# Supplementary material for: Frailty among middle-aged and older women and men in India: findings from wave 1 of the longitudinal Ageing study in India
Source: PubMed Central journal article supplement — BMJ Open. 2023 Jul 31;13(7):e071842. doi: 10.1136/bmjopen-2023-071842 (PMC10391831; doi:10.1136/bmjopen-2023-071842), 2023-07-31
Supplement: bmjopen-2023-071842.draft_revisions.pdf [file bmjopen-2023-071842.draft_revisions.pdf]

# BMJ Open

BMJ Open is committed to open peer review. As part of this commitment we make the peer review history of every article we publish publicly available.

When an article is published we post the peer reviewers' comments and the authors' responses online. We also post the versions of the paper that were used during peer review. These are the versions that the peer review comments apply to.

The versions of the paper that follow are the versions that were submitted during the peer review process. They are not the versions of record or the final published versions. They should not be cited or distributed as the published version of this manuscript.

BMJ Open is an open access journal and the full, final, typeset and author-corrected version of record of the manuscript is available on our site with no access controls, subscription charges or pay-per-view fees (<http://bmjopen.bmj.com>).

If you have any questions on BMJ Open's open peer review process please email [info.bmjopen@bmj.com](mailto:info.bmjopen@bmj.com)

# BMJ Open

## Frailty among middle-aged and older women and men in India: Findings from Wave 1 of the Longitudinal Aging Study in India

|                               |                                                                                                                                                                                                                                                                                                                                                                                                                        |
|-------------------------------|------------------------------------------------------------------------------------------------------------------------------------------------------------------------------------------------------------------------------------------------------------------------------------------------------------------------------------------------------------------------------------------------------------------------|
| Journal:                      | <i>BMJ Open</i>                                                                                                                                                                                                                                                                                                                                                                                                        |
| Manuscript ID                 | bmjopen-2023-071842                                                                                                                                                                                                                                                                                                                                                                                                    |
| Article Type:                 | Original research                                                                                                                                                                                                                                                                                                                                                                                                      |
| Date Submitted by the Author: | 19-Jan-2023                                                                                                                                                                                                                                                                                                                                                                                                            |
| Complete List of Authors:     | Ghosh, Arpita; The George Institute for Global Health India; Manipal Academy of Higher Education<br>Kundu, Monica; The George Institute for Global Health India<br>Devasenapathy, Niveditha; The George Institute for Global Health India<br>Woodward, Mark; The George Institute for Global Health; Imperial College London<br>Jha, Vivekanand; The George Institute for Global Health India; Imperial College London |
| Keywords:                     | EPIDEMIOLOGY, GERIATRIC MEDICINE, PUBLIC HEALTH, Quality of Life                                                                                                                                                                                                                                                                                                                                                       |
|                               |                                                                                                                                                                                                                                                                                                                                                                                                                        |

SCHOLARONE™  
Manuscripts

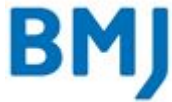

I, the Submitting Author has the right to grant and does grant on behalf of all authors of the Work (as defined in the below author licence), an exclusive licence and/or a non-exclusive licence for contributions from authors who are: i) UK Crown employees; ii) where BMJ has agreed a CC-BY licence shall apply, and/or iii) in accordance with the terms applicable for US Federal Government officers or employees acting as part of their official duties; on a worldwide, perpetual, irrevocable, royalty-free basis to BMJ Publishing Group Ltd ("BMJ") its licensees and where the relevant Journal is co-owned by BMJ to the co-owners of the Journal, to publish the Work in this journal and any other BMJ products and to exploit all rights, as set out in our [licence](#).

The Submitting Author accepts and understands that any supply made under these terms is made by BMJ to the Submitting Author unless you are acting as an employee on behalf of your employer or a postgraduate student of an affiliated institution which is paying any applicable article publishing charge ("APC") for Open Access articles. Where the Submitting Author wishes to make the Work available on an Open Access basis (and intends to pay the relevant APC), the terms of reuse of such Open Access shall be governed by a Creative Commons licence – details of these licences and which [Creative Commons](#) licence will apply to this Work are set out in our licence referred to above.

Other than as permitted in any relevant BMJ Author's Self Archiving Policies, I confirm this Work has not been accepted for publication elsewhere, is not being considered for publication elsewhere and does not duplicate material already published. I confirm all authors consent to publication of this Work and authorise the granting of this licence.

1  
2  
3 Frailty among middle-aged and older women and men in India: Findings from Wave 1 of the  
4  
5 Longitudinal Aging Study in India  
6  
7  
8  
9

10 Arpita Ghosh<sup>1,2</sup>, Monica Kundu<sup>3</sup>, Niveditha Devasenapathy<sup>3</sup>, Mark Woodward<sup>4,5</sup>, Vivekanand  
11  
12 Jha<sup>1,2,5\*</sup>  
13  
14  
15  
16  
17

18 <sup>1</sup> The George Institute for Global Health, University of New South Wales, New Delhi, India.  
19

20 <sup>2</sup> Prasanna School of Higher Education, Manipal Academy of Higher Education, Manipal,  
21  
22 India.  
23  
24

25 <sup>3</sup> The George Institute for Global Health, New Delhi, India.  
26  
27

28 <sup>4</sup> The George Institute for Global Health, University of New South Wales, Sydney, Australia.  
29  
30

31 <sup>5</sup> The George Institute for Global Health, School of Public Health, Imperial College London,  
32  
33 London, UK.  
34  
35

36  
37  
38  
39 \* Corresponding author  
40

41  
42 E-mail: v.jha@imperial.ac.uk  
43  
44  
45  
46  
47  
48  
49  
50  
51  
52  
53  
54  
55  
56  
57  
58  
59  
60

## Abstract

**Objectives:** Few studies have examined frailty in Indian adults, despite an increasing population of older adults and an escalating burden of chronic diseases. We aimed to study the prevalence and correlates of frailty in middle-aged and older Indian adults.

**Setting:** Cross-sectional data from Wave 1 of Longitudinal Ageing Study in India, conducted in 2017-2018 across all states and union territories, were used.

**Participants:** The final analytical sample included 57,649 participants aged 45 years and above who had information on frailty status.

**Primary outcome measure:** The deficits accumulation approach to measuring frailty was employed, creating a frailty index between 0 and 1, based on 40 deficits. Individuals with a frailty index of 0.25 or more were defined as 'frail'.

**Results:** Prevalence of frailty among 45-plus adults was 30%. 60-plus women were twice as likely to be frail compared to 60-plus men, after adjusting for a wide range of sociodemographic, economic and lifestyle factors. The sex difference was more pronounced in 45-59-year-olds. Odds of hospitalization in the last 12 months, and having falls in the past two years, were twice as high in frail adults compared to non-frail adults. Frail middle-aged and older adults had 33% and 39% higher odds, respectively, of having poor cognition than non-frail adults. The relative increase was higher in women for all three outcomes, although not statistically significant.

**Conclusions:** There needs to be careful consideration of sex differences when addressing frailty, particularly for optimizing frailty interventions. Frailty, although typically assessed in older adults, was shown in this study to be also prevalent and associated with adverse outcomes in middle-aged Indian adults. More research into assessment of frailty in younger populations, its trajectory and correlates may help develop public health measures for prevention of frailty.

## Strengths and limitations

1. The analyses were based on a nationally representative sample of 45-plus Indian adults from all states and union territories except Sikkim – ours is the first study to provide national, as well as state-level, estimates of prevalence of frailty.
2. We examined prevalence of frailty, its risk factors and association with adverse outcomes in middle-aged adults, in addition to older adults.
3. Our frailty index was constructed using 40 deficits, including deficits pertaining to mental impairment and instrumental activities of daily living aimed at assessing cognitive functioning, thus capturing the multidimensionality of frailty.
4. Due to cross-sectional nature of data, we were unable to look at temporal associations between frailty and adverse health outcomes.
5. We were not able to define other frailty measures such as the frailty phenotype, based on the available data.

## Background

Frailty is characterised by a decline in functioning across multiple physiological systems, accompanied by an increased vulnerability to stressors.<sup>1</sup> As a result, frail people are more likely to have adverse health outcomes when exposed to stressors than non-frail people.<sup>2</sup> A frailty score can help identify people with unique health needs, who need intervention to address the causes of poor health and improve outcomes in them. It can therefore be useful in clinical and community settings for risk stratification. However, there are multiple approaches and various tools to measure frailty and there is considerable disagreement between these instruments.<sup>3</sup> This is, in part, responsible for the marked variation in prevalence estimates across countries, and even within countries.<sup>4</sup>

Most studies on frailty are from high-income countries.<sup>4</sup> There exist several systematic reviews across geographical regions, but studies from low- and middle-income countries (LMICs) are limited and have used a variety of methods.<sup>5</sup> A few studies have shown that frailty prevalence and incidence are higher in LMICs compared to high-income countries.<sup>4 6-8</sup> However, interpretation of differences in prevalence between countries or regions is limited by the few data from LMICs. In a recent systematic review on prevalence of frailty in LMICs, only one of the 56 studies was from a low-income country and only two were from lower middle-income countries; the rest were from upper middle-income countries.<sup>5</sup> Robust disaggregated data on frailty in the Indian population are rare,<sup>9-13</sup> whilst no studies have provided subnational estimates on the prevalence of frailty.

Further, while there are many frailty studies amongst adults aged 60 years and above,<sup>4 5 8 14-16</sup> the extent of the problem and its significance in adults less than 60 years is poorly understood. Studies have shown that frailty is prevalent in younger adults and suggested that it be examined across the adult age spectrum.<sup>17-19</sup> This is especially true for India where chronic diseases develop a decade earlier than in HICs.<sup>20</sup> Furthermore, studies characterizing sex differences in frailty, and how frailty differently impacts health outcomes in women and men are rare in LMICs.<sup>11 21-25</sup>

1  
2  
3 With a rapidly aging population and a fragmented healthcare system, there is an urgent need  
4 to quantify frailty in India reliably, so as to inform the development of interventions and plan  
5 targeted service delivery. In this study, we examine frailty prevalence, its state-level and  
6 socioeconomic patterning and association, including sex-specific association, with key health  
7 outcomes in middle-aged (45-59-year-old) and older (60-year-plus) Indian adults.  
8  
9  
10  
11  
12  
13

## 14 **Methods**

### 15 **Data**

16  
17 We used data from Wave 1 of the Longitudinal Ageing Study in India (LASI) conducted in  
18 2017-2018.<sup>26</sup> LASI is a biennial panel survey, designed to provide longitudinal data on the  
19 broad domains of social, health and economic wellbeing of the elderly Indian population.<sup>26</sup>  
20  
21 Data from LASI wave 1 include 65,562 45-plus individuals from all states and union  
22 territories except Sikkim and is representative of the Indian population aged 45 years and  
23 above.  
24  
25  
26  
27  
28  
29  
30  
31  
32

### 33 **Variables**

#### 34 *Assessment of frailty*

35  
36 We used the frailty index measure based on a deficit accumulation approach, proposed by  
37 Rockwood and colleagues.<sup>27</sup> We included 40 deficits across different domains<sup>28</sup> – general  
38 health (1 deficit), diagnosed conditions (9 deficits), medical symptoms (4 deficits), mobility  
39 restrictions (9 deficits), basic Activities of Daily Living (ADL) and Instrumental Activities of  
40 Daily Living (IADL) limitations (13 deficits), any mental impairment (1 deficit), body mass  
41 index (1 deficit), grip strength (1 deficit) and gait speed (1 deficit). All deficits were assigned  
42 scores between 0 and 1, with 1 indicating complete deficit and 0 lack of any deficit. A  
43 detailed description is presented in **S1 Table. Error! Reference source not found.**The  
44 frailty index is the sum of deficit scores divided by the total number of deficits considered (40  
45 in our case), yielding a continuous score between 0 and 1. This index will be missing for an  
46 individual with missing data on any deficit. We used a cut-off of 0.25 to define presence or  
47  
48  
49  
50  
51  
52  
53  
54  
55  
56  
57  
58  
59  
60



1  
2  
3 absence of frailty<sup>29-31</sup> – individuals with frailty index  $\geq 0.25$  were defined as ‘frail’ and others  
4 as ‘non-frail’.  
5  
6

7  
8 In sensitivity analyses, we explored another commonly used frailty index cut-off, 0.21<sup>32</sup>. Also,  
9  
10 an alternative approach to calculating the frailty index that accounts for missing deficit scores  
11 was examined – up to 3 deficits were allowed to be missing and the frailty index for an  
12 individual was calculated by summing the non-missing health deficit scores and then dividing  
13  
14 by the total number of deficits measured in that individual.  
15  
16  
17

### 18 19 *Covariates*

20  
21 Demographic, socioeconomic and lifestyle factors were included as covariates – age, sex,  
22  
23 place of residence, educational status, living arrangement, monthly per capita consumption  
24  
25 expenditure (MPCE), working status, food constraint, religion, caste, tobacco use, alcohol  
26  
27 use and region. Food constraint referred to household food unavailability in the past 12  
28  
29 months. MPCE was defined as total monthly household consumption expenditure divided by  
30  
31 household size. Expenditure here includes the household’s per capita spending on food and  
32  
33 non-food items, including spending on health, education, and utilities. We used consumption  
34  
35 expenditure as our economic indicator as we consider this a better measure of living  
36  
37 standards and poverty than income. Also, household income information was missing for  
38  
39 1216 45-plus adults. As part of sensitivity analyses, we examined annual per capita  
40  
41 household income as the economic indicator.  
42  
43  
44

### 45 46 *Adverse outcomes*

47  
48 The respondents were asked about **number of hospitalizations** and **number of nights**  
49  
50 **spent in the hospital in the last 12 months**. In addition to these count outcome variables,  
51  
52 a binary outcome variable, **ever hospitalised in last 12 months**, was defined based on the  
53  
54 number of hospitalizations (**S2 Table**). Another binary outcome variable, **any fall in past 2**  
55  
56 **years**, was defined based on responses to questions about having fallen down or sustaining  
57  
58 a major injury from a fall in the past 2 years (**S2 Table**).  
59  
60

1  
2  
3 A composite **cognition score**, ranging from 0 to 43, was constructed by combining scores  
4 across five domains: memory, orientation, arithmetic function, executive functioning skills,  
5 and object naming (**S3 Table**). A higher score indicated better cognitive ability and **poor**  
6 **cognition** was defined as a score below the 10<sup>th</sup> percentile, which was 18.  
7  
8  
9

## 10 11 12 **Statistical analyses**

13  
14 Continuous variables were summarized as mean and standard deviation (SD) or median and  
15 interquartile interval (IQI) and categorical variables as frequencies and percentages. State-  
16 and national-level sampling weights were used to produce weighted prevalence estimates.  
17  
18 Multivariable logistic regressions were used to obtain odds ratios (ORs), with 95%  
19 confidence intervals (CIs) for the association between frailty status (frail vs. non-frail) and  
20 individuals' background characteristics – sex, age, place of residence, education,  
21 consumption expenditure, living arrangement, work status, food constraint, tobacco use,  
22 alcohol use, religion, and caste, separately for the middle-aged and older participants. Age  
23 was analysed as a continuous variable, and all other variables were treated as categorical.  
24  
25 Logistic and linear regressions were used to study associations between frailty status (frail  
26 vs. non-frail) and binary and continuous adverse outcomes, respectively. Poisson hurdle  
27 models were used for count outcomes with a high percentage of zeros – number of  
28 hospitalizations and number of nights spent in hospital in last 12 months. The Poisson hurdle  
29 model specifies a logistic regression for the zero counts and a truncated (at zero) Poisson  
30 model for the positive counts.<sup>33</sup> The association between frailty status and cognition score  
31 was examined using linear regression. All regressions examining associations between  
32 frailty and adverse outcomes were adjusted for participants' background characteristics. Sex  
33 differences in the associations with binary adverse outcomes were studied using the full  
34 interaction model, with all main effects and sex interactions with frailty as well as each  
35 confounding variable; sex-specific ORs were compared through women-to-men ratios of  
36 odds ratios (RORs).<sup>34</sup> All regressions were adjusted for state fixed effects to account for  
37  
38  
39  
40  
41  
42  
43  
44  
45  
46  
47  
48  
49  
50  
51  
52  
53  
54  
55  
56  
57  
58  
59  
60

state-level variation. All statistical analyses were carried out using Stata 13 (StataCorp LP, College Station, Texas, USA) and R version 4.2.0.<sup>35 36</sup>

## Patient and public involvement

Patients or the public were not involved in this secondary analysis of publicly available survey data.

## Results

### Description of study participants

LASI included 34,098 middle-aged adults (45-59 years) and 31,464 older adults (60 years and above). 7,913 participants for whom information related to frailty was missing were excluded from analyses, resulting in a total sample of 57,649 participants. Participants were further excluded while studying associations with outcomes, because of missing outcome data (**S1 Fig**). Of the 57,649 study participants, 55% of middle-aged adults and 52% of older participants were female (**Table 1**). Around 60% of the participants had no or less than 5 years of schooling, 66% lived in the rural areas, around a quarter had never worked, and 82% and 63% reported never consuming alcohol and never using any tobacco product, respectively. There were small differences between participants with missing frailty information and those included in analyses (**S4 Table**). Participants with missing frailty data (n=7,913) were more likely to be older, residing in urban areas, living with children and/or others and not working currently.

**Table 1. Characteristics of study participants.**

| Characteristic                | Overall,<br>N = 57,649 | 45-60 years,<br>N = 30,568 | 60-plus years,<br>N = 27,081 |
|-------------------------------|------------------------|----------------------------|------------------------------|
| <b>Sex</b>                    |                        |                            |                              |
| Female                        | 30,874 (54%)           | 16,912 (55%)               | 13,962 (52%)                 |
| Male                          | 26,775 (46%)           | 13,656 (45%)               | 13,119 (48%)                 |
| <b>Age, Median (Q1 – Q3)*</b> | 58 (50, 66)            | 51 (48, 55)                | 67 (63, 72)                  |
| <b>Place of residence</b>     |                        |                            |                              |
| Rural                         | 37,805 (66%)           | 19,730 (65%)               | 18,075 (67%)                 |
| Urban                         | 19,844 (34%)           | 10,838 (35%)               | 9,006 (33%)                  |
| <b>Educational status</b>     |                        |                            |                              |
| No schooling                  | 26,961 (47%)           | 12,562 (41%)               | 14,399 (53%)                 |
| Less than 5 years             | 6,738 (12%)            | 3,404 (11%)                | 3,334 (12%)                  |

|                                                        |              |              |              |
|--------------------------------------------------------|--------------|--------------|--------------|
| 5 to 9 years                                           | 13,280 (23%) | 7,995 (26%)  | 5,285 (20%)  |
| 10 years or more                                       | 10,670 (19%) | 6,607 (22%)  | 4,063 (15%)  |
| <b>MPCE fifths<sup>†</sup></b>                         |              |              |              |
| Poorest                                                | 11,358 (20%) | 5,846 (19%)  | 5,512 (20%)  |
| Poorer                                                 | 11,673 (20%) | 6,067 (20%)  | 5,606 (21%)  |
| Middle                                                 | 11,676 (20%) | 6,081 (20%)  | 5,595 (21%)  |
| Richer                                                 | 11,633 (20%) | 6,276 (21%)  | 5,357 (20%)  |
| Richest                                                | 11,309 (20%) | 6,298 (21%)  | 5,011 (19%)  |
| <b>Living arrangement</b>                              |              |              |              |
| Living alone                                           | 2,034 (3.5%) | 627 (2.1%)   | 1,407 (5.2%) |
| Living with spouse with or without children            | 42,607 (74%) | 25,346 (83%) | 17,261 (64%) |
| Living with children and others                        | 10,709 (19%) | 3,641 (12%)  | 7,068 (26%)  |
| Living with others only                                | 2,299 (4.0%) | 954 (3.1%)   | 1,345 (5.0%) |
| <b>Employment</b>                                      |              |              |              |
| Currently working <sup>§</sup>                         | 28,939 (50%) | 19,365 (63%) | 9,574 (35%)  |
| Worked in the past                                     | 13,045 (23%) | 2,961 (9.7%) | 10,084 (37%) |
| Never worked                                           | 15,665 (27%) | 8,242 (27%)  | 7,423 (27%)  |
| <b>Food constraint<sup>¶</sup></b>                     |              |              |              |
| No                                                     | 53,801 (93%) | 28,624 (94%) | 25,177 (93%) |
| Yes                                                    | 3,848 (6.7%) | 1,944 (6.4%) | 1,904 (7.0%) |
| <b>Tobacco use</b>                                     |              |              |              |
| Never used tobacco                                     | 36,252 (63%) | 19,919 (65%) | 16,333 (60%) |
| Current/past user                                      | 21,373 (37%) | 10,633 (35%) | 10,740 (40%) |
| Missing                                                | 24           | 16           | 8            |
| <b>Alcohol use</b>                                     |              |              |              |
| Never consumed                                         | 47,218 (82%) | 24,848 (81%) | 22,370 (83%) |
| Less than once a month in past 3 months                | 6,024 (10%)  | 3,123 (10%)  | 2,901 (11%)  |
| One to three days per month or more frequently         | 4,397 (7.6%) | 2,591 (8.5%) | 1,806 (6.7%) |
| Missing                                                | 10           | 6            | 4            |
| <b>Caste</b>                                           |              |              |              |
| Scheduled caste                                        | 9,695 (17%)  | 5,278 (17%)  | 4,417 (16%)  |
| Scheduled tribe                                        | 10,140 (18%) | 5,656 (19%)  | 4,484 (17%)  |
| Other backward class                                   | 21,813 (38%) | 11,461 (37%) | 10,352 (38%) |
| None of the above/no caste or tribe/don't know/missing | 16,001 (28%) | 8,173 (27%)  | 7,828 (29%)  |
| <b>Religion</b>                                        |              |              |              |
| Hindu                                                  | 42,322 (73%) | 22,482 (74%) | 19,840 (73%) |
| Muslim                                                 | 6,806 (12%)  | 3,625 (12%)  | 3,181 (12%)  |
| Christian                                              | 5,802 (10%)  | 3,069 (10%)  | 2,733 (10%)  |
| Other                                                  | 2,719 (4.7%) | 1,392 (4.6%) | 1,327 (4.9%) |
| <b>Region</b>                                          |              |              |              |
| North                                                  | 10,537 (18%) | 5,536 (18%)  | 5,001 (18%)  |
| Central                                                | 7,975 (14%)  | 4,257 (14%)  | 3,718 (14%)  |
| East                                                   | 10,443 (18%) | 5,344 (17%)  | 5,099 (19%)  |
| Northeast                                              | 7,551 (13%)  | 4,285 (14%)  | 3,266 (12%)  |
| West                                                   | 7,580 (13%)  | 3,977 (13%)  | 3,603 (13%)  |
| South                                                  | 13,563 (24%) | 7,169 (23%)  | 6,394 (24%)  |

Numbers presented in table are unweighted.

<sup>†</sup> Q1: first quartile, Q3: third quartile.

1  
2  
3 † MPCE: monthly per capita expenditure which is defined as total monthly household consumption  
4 expenditure divided by household size. It includes household's per capita spending on food and non-  
5 food items including spending on health, education, utilities, etc.  
6  
7

8  
9 § Includes Temporarily laid off, on sick or other leave, or in job training

10 ¶ Household food unavailability in the past 12 months, where household members either reduced their  
11 meal size, did not eat even though they were hungry, or did not eat for a whole day because enough  
12 food was not available in the household.  
13  
14  
15  
16  
17  
18

### 19 **Prevalence of frailty**

20  
21 The observed frailty index values ranged between 0 and 0.83, with a median of 0.14 (IQR=  
22 0.08 - 0.25) and mean of 0.18 (SD = 0.13) (**S2 Fig**, panel A). Using the cut-off of 0.25, the  
23 prevalence of frailty among adults 45 years and older was 29.5% (95% CI= 28.7 - 30.4).  
24  
25 Prevalence was higher among older adults compared with middle-aged adults (43.2% vs.  
26 16.2%) and among women compared to men (36.1% vs. 21.7%) (**S5 Table**).  
27  
28  
29  
30  
31

32  
33 There was substantial geographical variation in the prevalence of frailty, ranging between  
34 8.8% in Arunachal Pradesh and 38.2% in West Bengal (**Fig 1**). For middle-aged adults, the  
35 prevalence of frailty among females was double that in males (21.4% vs. 9.6%). For the  
36 older participants, frailty prevalence was almost 20 percentage points higher in females than  
37 in males (52.2% vs. 33.2%). Among older males, the prevalence varied between 11.8% in  
38 Nagaland and 42.7% in West Bengal. In 14 out of 35 states, more than 50% of the older  
39 women were frail, with the highest prevalence in Jammu & Kashmir (69%). Region-wise, 5  
40 out of the 7 North-eastern states covered always appeared among the bottom 8 states with  
41 lowest prevalence, for both the age groups and sexes.  
42  
43  
44  
45  
46  
47  
48  
49  
50  
51

### 52 **Sociodemographic, economic and lifestyle factors associated with frailty**

53  
54 Frailty prevalence varied widely across different social strata (**S5 Table**). Females had  
55 higher odds of being frail than males (OR (95% CI) = 2.3 (2, 2.5) among middle-aged adults  
56 and 2.0 (1.8, 2.1) among older adults), after adjusting for other background characteristics  
57  
58  
59  
60

1  
2  
3 (Fig 2). Among middle-aged participants, Muslims had 32% (95% CI = 18 to 48%) higher  
4 odds of being frail, compared to Hindus; the difference was attenuated in the older ages (OR  
5 (95% CI) = 1.1 (1, 1.2)). Adjusted odds of being frail increased by 23% and 12% with one  
6 year increase in age, among middle-aged and older participants, respectively. While higher  
7 education was negatively associated with frailty, with more educated people having lower  
8 odds, the individuals in the two highest expenditure fifths were likely to be frailer than those  
9 in the lowest 20%. The odds of being frail were higher among participants from rural areas  
10 compared to urban areas, tobacco users compared to non-users, infrequent drinkers  
11 compared to abstainers, and among participants facing food constraint.  
12  
13  
14  
15  
16  
17  
18  
19  
20  
21  
22

### 23 Association with adverse health outcomes

24  
25 Six percent of the middle-aged and 8% of the older adults were hospitalised in past 12  
26 months (Table 2Error! Reference source not found.). Fall in the past 2 years was  
27 recorded among 16% of middle-aged adults and 20% of older adults. The median cognition  
28 score was 27 (IQI = 22 - 32) and 7% and 15% of the middle-aged and older populations,  
29 respectively, had poor cognition, that is, were in the lowest 10% (S2 Fig, panel B). In both  
30 age groups, these adverse outcomes were more frequent, often double, among the frail  
31 participants compared to the non-frail. After adjusting for background characteristics of  
32 participants, frailty was associated with higher odds of all three outcomes studied –  
33 hospitalization in the last 12 months (OR (95% CI) = 2.4 (2.1, 2.7) among middle-aged  
34 adults and 2.2 (2.0, 2.4) among older adults), fall in the past two years (OR (95% CI) = 2.17  
35 (2.01, 2.36) and 1.9 (1.77, 2.03) in middle-aged and older adults, respectively) and poor  
36 cognition (OR (95% CI) = 1.33 (1.16, 1.53) and 1.39 (1.26, 1.54) in middle-aged and older  
37 adults, respectively) (Table 2).  
38  
39  
40  
41  
42  
43  
44  
45  
46  
47  
48  
49  
50  
51  
52  
53  
54  
55  
56  
57  
58  
59  
60

**Table 2. Association between frailty and adverse outcomes – hospitalized in last 12 months, any fall in past 2 years and poor cognition.**

| Outcome                               | 45–59-year-old adults |                 |                |                          | 60-plus adults  |                 |                |                          |
|---------------------------------------|-----------------------|-----------------|----------------|--------------------------|-----------------|-----------------|----------------|--------------------------|
|                                       | All                   | Non-frail       | Frail          | Adjusted* OR<br>(95% CI) | All             | Non-frail       | Frail          | Adjusted* OR<br>(95% CI) |
| <b>Hospitalized in last 12 months</b> |                       |                 |                |                          |                 |                 |                |                          |
| No                                    | 28,440<br>(94%)       | 24,658<br>(95%) | 3,782<br>(89%) | -                        | 24,631<br>(92%) | 15,364<br>(94%) | 9,267<br>(89%) | -                        |
| Yes                                   | 1,681<br>(5.6%)       | 1,215<br>(4.7%) | 466<br>(11%)   | 2.35 (2.09, 2.66)        | 2,038<br>(7.6%) | 911<br>(5.6%)   | 1,127<br>(11%) | 2.19 (1.98, 2.42)        |
| Missing                               | 447                   | 393             | 54             |                          | 412             | 226             | 186            |                          |
| <b>Any fall in past 2 years</b>       |                       |                 |                |                          |                 |                 |                |                          |
| No                                    | 25,651<br>(84%)       | 22,605<br>(86%) | 3,046<br>(71%) | -                        | 21,712<br>(80%) | 14,005<br>(85%) | 7,707<br>(73%) | -                        |
| Yes                                   | 4,914<br>(16%)        | 3,658<br>(14%)  | 1,256<br>(29%) | 2.17 (2.01, 2.36)        | 5,365<br>(20%)  | 2,495<br>(15%)  | 2,870<br>(27%) | 1.9 (1.77, 2.03)         |
| Missing                               | 3                     | 3               | 0              |                          | 4               | 1               | 3              |                          |
| <b>Poor cognition†</b>                |                       |                 |                |                          |                 |                 |                |                          |
| No                                    | 22,017<br>(93%)       | 19,343<br>(93%) | 2,674<br>(88%) | -                        | 15,521<br>(85%) | 10,540<br>(88%) | 4,981<br>(78%) | -                        |
| Yes                                   | 1,727<br>(7.3%)       | 1,362<br>(6.6%) | 365<br>(12%)   | 1.33 (1.16, 1.53)        | 2,750<br>(15%)  | 1,375<br>(12%)  | 1,375<br>(22%) | 1.39 (1.26, 1.54)        |
| Missing                               | 6,824                 | 5,561           | 1,263          |                          | 8,810           | 4,586           | 4,224          |                          |

\*Adjusted for participants' sex, age, rural place of residence, education, consumption expenditure, living arrangement, work status, food constraint, tobacco use, alcohol use, religion, caste, and state.

† Poor cognition was defined as a cognition score below the 10<sup>th</sup> percentile, which was 18.

1  
2  
3 Being frail was associated with a 74% (95% CI = 45 – 109%) and 122% (95% CI = 83 –  
4  
5 170%) increase in mean number of hospitalizations in the last 12 months and a 15% (95%  
6  
7 CI = 10 – 21%) and 18% (95% CI = 13 – 23%) increase in mean number of nights spent in  
8  
9 the hospital in last 12 months, among the middle-aged and older adults, respectively (**Table**  
10  
11 **3**). Frailty was associated with one-unit lower cognition scores in both the age groups – the  
12  
13 mean difference, for frailty versus not, was -1.02 (-1.2, -0.84) in middle-aged adults and  
14  
15 -1.05 (-1.2, -0.89) in the older adults.  
16  
17  
18  
19  
20  
21  
22  
23  
24  
25  
26  
27  
28  
29  
30  
31  
32  
33  
34  
35  
36  
37  
38  
39  
40  
41  
42  
43  
44  
45  
46  
47  
48  
49  
50  
51  
52  
53  
54  
55  
56  
57  
58  
59  
60



**Table 3. Association between frailty and adverse outcomes – number of times hospitalized in last 12 months, number of nights spent in hospital in last 12 months and cognition score.**

| Outcome                                                     | 45–59-year-old adults |             |             |                                    | 60-plus adults |             |             |                                    |
|-------------------------------------------------------------|-----------------------|-------------|-------------|------------------------------------|----------------|-------------|-------------|------------------------------------|
|                                                             | All                   | Non-frail   | Frail       | Adjusted* effect estimate (95% CI) | All            | Non-frail   | Frail       | Adjusted* effect estimate (95% CI) |
| <b>Number of times hospitalized in last 12 months</b>       |                       |             |             |                                    |                |             |             |                                    |
| N                                                           | 30,121                | 25,873      | 4,248       | Rate ratio =                       | 26,669         | 16,275      | 10,394      | Rate ratio =                       |
| Range                                                       | 0-23                  | 0-14        | 0-23        | 1.74 (1.45, 2.09)                  | 0-20           | 0-7         | 0-20        | 2.22 (1.83, 2.7)                   |
| Mean (SD)                                                   | 0.07 (0.42)           | 0.06 (0.33) | 0.16 (0.75) |                                    | 0.10 (0.43)    | 0.06 (0.30) | 0.15 (0.58) |                                    |
| Median (IQR)                                                | 0 (0, 0)              | 0 (0, 0)    | 0 (0, 0)    |                                    | 0 (0, 0)       | 0 (0, 0)    | 0 (0, 0)    |                                    |
| <b>Number of nights spent in hospital in last 12 months</b> |                       |             |             |                                    |                |             |             |                                    |
| N                                                           | 30,120                | 25,872      | 4,248       | Rate ratio =                       | 26,669         | 16,275      | 10,394      | Rate ratio =                       |
| Range                                                       | 0-169                 | 0-169       | 0-120       | 1.15 (1.1, 1.21)                   | 0-120          | 0-120       | 0-90        | 1.18 (1.13, 1.23)                  |
| Mean (SD)                                                   | 0.34 (2.57)           | 0.27 (2.35) | 0.74 (3.64) |                                    | 0.48 (2.88)    | 0.33 (2.43) | 0.71 (3.47) |                                    |
| Median (IQR)                                                | 0 (0, 0)              | 0 (0, 0)    | 0 (0, 0)    |                                    | 0 (0, 0)       | 0 (0, 0)    | 0 (0, 0)    |                                    |
| <b>Cognition score</b>                                      |                       |             |             |                                    |                |             |             |                                    |
| N                                                           | 23,744                | 20,705      | 3,039       | Mean difference                    | 18,271         | 11,915      | 6,356       | Mean difference =                  |
| Range                                                       | 7-43                  | 7-43        | 8-42        | = -1.02 (-1.2, -0.84)              | 4-43           | 7-43        | 4-43        | -1.05 (-1.2, -0.89)                |
| Mean (SD)                                                   | 28 (6)                | 28 (6)      | 26 (6)      |                                    | 26 (6)         | 27 (6)      | 24 (6)      |                                    |
| Median (IQR)                                                | 28 (24, 33)           | 29 (24, 33) | 26 (22, 30) |                                    | 26 (21, 31)    | 27 (22, 31) | 24 (19, 29) |                                    |

\*Adjusted for participants' sex, age, rural place of residence, education, consumption expenditure, living arrangement, work status, food constraint, tobacco use, alcohol use, religion, caste, and state.

## Sex differences

Of the 40 deficits that were considered, men fared worse than women only for grip strength, stroke, chronic obstructive pulmonary disease and asthma; whereas more women than men had poor general health, most diagnosed conditions, medical symptoms, mobility restrictions, difficulties with normal daily self-care activities and needed supervision or assistance, were either underweight, overweight or obese, and had slow gait speed (**S6 Table**). The sex differences in mobility restrictions and ADL/IADL limitations were especially pronounced, even in the middle-aged adults.

The adjusted odds of hospitalization in the past 12 months, falls in the past 2 years and poor cognition were higher for frail compared to non-frail adults, in both women and men. In women the ORs were higher than in men, in both the age groups. Women-to-men RORs were thus higher than unity for all three outcomes, although their CIs included zero, except for falls in past 2 years in the 60-plus age group, so that chance findings could not be ruled out (**S7 Table**).

## Sensitivity analyses

Of the 40 deficits considered, all deficits, except body mass index, grip strength and gait speed, were missing in <2% of the 45-plus participants; and these three measurements were missing in 10-11% of participants (**S3 Fig**). The frailty index calculated using non-missing health deficit scores made no difference to the prevalence estimates – 17% of middle-aged adults and 44% of older participants were frail using this metric (**S8 Table**).

ORs for the association between frailty and adverse outcomes were also similar (**S9 Table**).

Using an alternative cut-off value of 0.21,<sup>32 37</sup> the prevalence of frailty increased to 37%.

Even though frailty prevalence was inevitably higher using this cut-off (**S8 Table and S4 Fig**), the associations with adverse outcomes were similar (**S9 Table**).

No association between frailty and income was found after adjusting for other factors, when using household income instead of consumption expenditure as the economic indicator in

1  
2  
3 analysis exploring sociodemographic, economic and lifestyle factors associated with frailty  
4  
5 (S5 Fig).  
6  
7

## 8 Discussion

9

10 To our knowledge, this is the first study to provide national, as well as state-level, estimates  
11 of prevalence of frailty and its association with outcomes across the age spectrum amongst  
12 45-plus Indian adults. Our study showed that frailty is common among 45-plus Indian adults  
13 and it varies across the states. We found that women were more than twice as likely to be  
14 frail than men, after adjusting for a wide range of factors. We showed that frailty, usually  
15 assessed only in older adults, was also prevalent in 45-59-year-old middle-aged adults, and  
16 was associated with hospitalization, falls and poor cognitive functioning.  
17  
18  
19  
20  
21  
22  
23  
24  
25

26 Our findings are in line with associations observed in other studies – female sex,<sup>21</sup> lower  
27 education<sup>11</sup> and tobacco use<sup>38</sup> are well-known determinants of frailty. Our analyses pointed  
28 out that sex-differences in mobility restrictions and ADL/IADL limitations were especially  
29 pronounced, even among the middle-aged adults. Interestingly, we found frailty to be more  
30 prevalent in upper fifths of consumption expenditure, while many studies have shown an  
31 inverse gradient with economic well-being. We hypothesize that this may be because frail  
32 people tend to incur more healthcare expenditure, resulting in higher consumption  
33 expenditure. The positive association, however, was no longer present when per capita  
34 household income was instead used as the economic indicator. Another intriguing finding  
35 was that infrequent drinking was associated with higher odds of frailty compared to  
36 abstaining, but the same was not true for frequent drinking. Other studies have shown  
37 similar associations with infrequent and frequent alcohol intakes compared to zero  
38 consumption.<sup>19 39 40</sup> This, however, should be treated with caution, as it can be due to  
39 residual confounding or healthy survivor bias. Our results suggest that vulnerable groups  
40 should be targeted when developing interventions to prevent and manage frailty. For  
41 achieving best results, the interventions should be customized per their needs.<sup>41</sup> For this,  
42  
43  
44  
45  
46  
47  
48  
49  
50  
51  
52  
53  
54  
55  
56  
57  
58  
59  
60

1  
2  
3 knowledge of underlying mechanisms is essential and should be explored in future frailty  
4  
5 research.  
6  
7

8 Frailty was associated with hospitalization, falls and poor cognition, across both the age  
9  
10 groups and sexes. A systematic review of 13 prospective studies in community-dwelling  
11  
12 older adults found physical frailty to be a predictor of hospitalisation.<sup>42</sup> The authors  
13  
14 speculated that fall-related injuries could be one of the contributors. Another systematic  
15  
16 review of 11 studies showed that frailty, however defined, is a significant predictor of future  
17  
18 falls among community-dwelling older people. Fall risk according to frailty was found to be  
19  
20 higher in men than in women. A prospective population-based study, using data from the  
21  
22 Canadian Study of Health and Aging, showed that frailty status, defined using various  
23  
24 criteria, is strongly associated with changes in cognition.<sup>43</sup>  
25  
26

27 Inclusion of over 34,000 45-59-year-olds in LASI allowed us to examine frailty, its risk  
28  
29 factors, and its association with adverse outcomes for the first time in the middle-aged Indian  
30  
31 population. The association between frailty and hospitalization and falls was even stronger in  
32  
33 middle-aged adults compared to older adults. Although the prevalence of frailty increases  
34  
35 with age, it is not limited to the elderly. Studies looking into associations between frailty and  
36  
37 adverse outcomes in middle-aged adults are rare, and they highlight the need to identify,  
38  
39 manage, and prevent frailty across the age spectrum.<sup>19 44 45</sup>  
40  
41  
42

43 Our study has many strengths. First, our study provides frailty prevalence estimates among  
44  
45 45-plus adults for all Indian states and union territories (except Sikkim), in addition to a  
46  
47 national prevalence estimate. Second, we examined prevalence of frailty, its risk factors and  
48  
49 association with adverse outcomes in middle-aged adults, in addition to older adults. Third,  
50  
51 our frailty index was constructed using 40 deficits, 30 being the minimum number to ensure  
52  
53 sufficient accuracy in predicting adverse events. We included deficits pertaining to mental  
54  
55 impairment and instrumental activities of daily living aimed at assessing cognitive  
56  
57 functioning, thus capturing the multidimensionality of frailty. Finally, the sensitivity analyses  
58  
59  
60

1  
2  
3 helped demonstrate that our findings about variation in frailty and its association with  
4  
5 outcomes are robust to the cut-off used to define frailty.  
6  
7

8 We also recognize certain limitations. First, we were not able to define other frailty measures  
9  
10 such as the frailty phenotype, based on available data. Given that prevalence estimates vary  
11  
12 widely depending on the assessment method,<sup>4 5 10 37</sup> it would have been more informative if  
13  
14 we were able to compare our findings using other frailty measures. Second, our cross-  
15  
16 sectional study is unable to look at temporal associations between frailty and adverse health  
17  
18 outcomes. LASI is designed as a panel study and data from subsequent waves will allow for  
19  
20 examination of temporal associations in the future. Third, LASI employed a multistage  
21  
22 cluster sampling design but variables identifying participants belonging to the same cluster  
23  
24 have not been made publicly available, limiting our ability to account for the cluster sampling  
25  
26 design in analyses and generate robust standard errors.<sup>46</sup> Fourth, there is but limited  
27  
28 evidence to support the use of frailty index in middle-aged adults<sup>47-49</sup> and future research  
29  
30 should explore suitable frailty measures and cut-offs.  
31  
32  
33

## 34 **Conclusion**

35  
36 Our study has implications for healthcare delivery planning. We show that women are  
37  
38 significantly more likely to be frail compared with men, across both age groups studied.

39  
40 These high levels of frailty among women will have a significant impact on patient-reported  
41  
42 and clinical outcomes. Strategies to mitigate frailty should consider these sex differences.

43  
44 Also, we have demonstrated that frailty is prevalent in 45-59-year-old middle-aged adults,  
45  
46 exhibits social patterning and is associated with adverse outcomes, suggesting that younger  
47  
48 adults may be identified as frail and may benefit from early detection and delivery of timely  
49  
50 care.  
51  
52  
53  
54  
55  
56  
57  
58  
59  
60

## Declarations

### Ethics approval and consent to participate

Not applicable. We used LASI survey data available in the public domain from the International Institute for Population Sciences website. Ethics approval for LASI survey was granted by all collaborating institutions and the Indian Council for Medical Research. Written informed consent was obtained for household survey, individual survey, and dried blood spot collection.

### Availability of data and materials

LASI survey data are available in the public domain from the International Institute for Population Sciences (IIPS) website. Application has to be made for access to data and access is granted after review by IIPS for legitimate academic research purposes. Link for application can be accessed at <https://www.iipsindia.ac.in/content/LASI-data>.

### Competing interests

AG, MK and ND have no conflicts of interest to declare. MW is a consultant to Amgen, and Freeline. VJ has received grant funding from GSK, Baxter Healthcare, and Biocon and honoraria from Bayer, AstraZeneca, Boeringer Ingelheim, NephroPlus and Zydus Cadilla, under the policy of all honoraria being paid to the organization.

### Funding

No funding was received to conduct this study.

LASI Wave 1 was financially supported by Ministry of Health and Family Welfare, Govt. of India, National Institute on Aging (NIA/NIH), USA and United Nations Population Fund, India.

### Authors' contributions

AG and MK conceived the idea for the study, performed literature review, conducted data preparation, carried out statistical analyses and wrote the first draft. All authors contributed

1  
2  
3 to interpretation of the study findings. VJ, MW, ND and AG contributed to reviewing and  
4 editing the final draft. All authors have read and approved the final manuscript.  
5  
6  
7

## 8 **Acknowledgements**

9  
10 We would like to thank International Institute for Population Sciences, LASI survey team and  
11 study participants who made this analysis possible.  
12  
13  
14  
15  
16  
17

## 18 **References**

- 19
- 20
- 21 1. Hoogendijk EO, Afilalo J, Ensrud KE, et al. Frailty: implications for clinical practice and  
22 public health. *The Lancet* 2019;394(10206):1365-75.
- 23 2. Clegg A, Young J, Iliffe S, et al. Frailty in elderly people. *The lancet* 2013;381(9868):752-  
24 62.
- 25 3. Aguayo GA, Donneau A-F, Vaillant MT, et al. Agreement between 35 published frailty  
26 scores in the general population. *American journal of epidemiology* 2017;186(4):420-  
27 34.
- 28 4. O’Caoimh R, Sezgin D, O’Donovan MR, et al. Prevalence of frailty in 62 countries across  
29 the world: a systematic review and meta-analysis of population-level studies. *Age*  
30 *and ageing* 2021;50(1):96-104.
- 31 5. Siriwardhana DD, Haroon S, Rait G, et al. Prevalence of frailty and prefrailty among  
32 community-dwelling older adults in low-income and middle-income countries: a  
33 systematic review and meta-analysis. *BMJ open* 2018;8(3):e018195.
- 34 6. Alvarado BE, Zunzunegui M-V, Béland F, et al. Life course social and health conditions  
35 linked to frailty in Latin American older men and women. *The Journals of Gerontology*  
36 *Series A: Biological Sciences and Medical Sciences* 2008;63(12):1399-406.
- 37 7. Da Mata FAF, Pereira PPdS, Andrade KRCd, et al. Prevalence of frailty in Latin America  
38 and the Caribbean: a systematic review and meta-analysis. *PloS one*  
39 2016;11(8):e0160019.
- 40 8. Ofori-Asenso R, Chin KL, Mazidi M, et al. Global incidence of frailty and prefrailty among  
41 community-dwelling older adults: a systematic review and meta-analysis. *JAMA*  
42 *network open* 2019;2(8):e198398-e98.
- 43 9. Kshatri JS, Palo SK, Bhoi T, et al. Associations of multimorbidity on frailty and  
44 dependence among an elderly rural population: Findings from the AHSETS study.  
45 *Mechanisms of Ageing and Development* 2020;192:111384.
- 46 10. Kendhapedi KK, Devasenapathy N. Prevalence and factors associated with frailty among  
47 community-dwelling older people in rural Thanjavur district of South India: a cross-  
48 sectional study. *BMJ open* 2019;9(10):e032904.
- 49 11. Biritwum R, Minicuci N, Yawson A, et al. Prevalence of and factors associated with frailty  
50 and disability in older adults from China, Ghana, India, Mexico, Russia and South  
51 Africa. *Maturitas* 2016;91:8-18.
- 52 12. Chaudhary M, Arokiasamy P. Patterns of frailty and quality of life among older adults:  
53 Comparative analysis using SAGE States of India. *Journal of Population Ageing*  
54 2019;12(1):1-23.
- 55 13. Dasgupta A, Bandyopadhyay S, Bandyopadhyay L, et al. How frail are our elderly? An  
56 assessment with Tilburg frailty indicator (TFI) in a rural elderly population of West  
57 Bengal. *Journal of family medicine and primary care* 2019;8(7):2242.  
58  
59  
60

14. Collard RM, Boter H, Schoevers RA, et al. Prevalence of frailty in community-dwelling older persons: a systematic review. *Journal of the American Geriatrics Society* 2012;60(8):1487-92.
15. He B, Ma Y, Wang C, et al. Prevalence and risk factors for frailty among community-dwelling older people in China: a systematic review and meta-analysis. *The Journal of Nutrition, Health & Aging* 2019;23(5):442-50.
16. Kojima G, Iliffe S, Taniguchi Y, et al. Prevalence of frailty in Japan: A systematic review and meta-analysis. *Journal of Epidemiology* 2017;27(8):347-53.
17. Conroy S, Maynou L. Frailty: time for a new approach to health care? *The Lancet Healthy Longevity* 2021;2(2):e60-e61.
18. Blodgett JM, Rockwood K, Theou O. Changes in the severity and lethality of age-related health deficit accumulation in the USA between 1999 and 2018: a population-based cohort study. *The Lancet Healthy Longevity* 2021;2(2):e96-e104.
19. Hanlon P, Nicholl BI, Jani BD, et al. Frailty and pre-frailty in middle-aged and older adults and its association with multimorbidity and mortality: a prospective analysis of 493 737 UK Biobank participants. *The Lancet Public Health* 2018;3(7):e323-e32.
20. Arokiasamy P. India's escalating burden of non-communicable diseases. *The Lancet Global Health* 2018;6(12):e1262-e63.
21. Gordon E, Peel N, Samanta M, et al. Sex differences in frailty: a systematic review and meta-analysis. *Experimental Gerontology* 2017;89:30-40.
22. Ahrenfeldt LJ, Möller S, Thinggaard M, et al. Sex differences in comorbidity and frailty in Europe. *International Journal of Public Health* 2019;64(7):1025-36.
23. Kane AE, Howlett SE. Sex differences in frailty: Comparisons between humans and preclinical models. *Mechanisms of Ageing and Development* 2021;198:111546.
24. Gordon E, Hubbard R. Physiological basis for sex differences in frailty. *Current Opinion in Physiology* 2018;6:10-15.
25. Gordon E, Hubbard R. Do sex differences in chronic disease underpin the sex-frailty paradox? *Mechanisms of ageing and development* 2019;179:44-50.
26. International Institute for Population Sciences (IIPS), National Programme for Health Care of Elderly (NPHCE), MoHFW, Harvard T. H. Chan School of Public Health (HSPH) and the University of Southern California (USC) 2020. Longitudinal Ageing Study in India (LASI) Wave 1, 2017-18, India Report, International Institute for Population Sciences, Mumbai.
27. Rockwood K, Mitnitski A. Frailty in relation to the accumulation of deficits. *The Journals of Gerontology Series A: Biological Sciences and Medical Sciences* 2007;62(7):722-27.
28. Searle SD, Mitnitski A, Gahbauer EA, et al. A standard procedure for creating a frailty index. *BMC Geriatrics* 2008;8(1):1-10.
29. Gordon E, Reid N, Khetani I, et al. How frail is frail? A systematic scoping review and synthesis of high impact studies. *BMC Geriatrics* 2021;21(1):1-9.
30. Rockwood K, Andrew M, Mitnitski A. A comparison of two approaches to measuring frailty in elderly people. *The Journals of Gerontology Series A: Biological Sciences and Medical Sciences* 2007;62(7):738-43.
31. Song X, Mitnitski A, Rockwood K. Prevalence and 10-year outcomes of frailty in older adults in relation to deficit accumulation. *Journal of the American Geriatrics Society* 2010;58(4):681-87.
32. Rockwood K, Song X, Mitnitski A. Changes in relative fitness and frailty across the adult lifespan: evidence from the Canadian National Population Health Survey. *Cmaj* 2011;183(8):E487-E94.
33. Mullahy J. Specification and testing of some modified count data models. *Journal of Econometrics* 1986;33(3):341-65.
34. Woodward M. Rationale and tutorial for analysing and reporting sex differences in cardiovascular associations. *Heart* 2019;105(22):1701-08.



- 1
  - 2
  - 3
  - 4
  - 5
  - 6
  - 7
  - 8
  - 9
  - 10
  - 11
  - 12
  - 13
  - 14
  - 15
  - 16
  - 17
  - 18
  - 19
  - 20
  - 21
  - 22
  - 23
  - 24
  - 25
  - 26
  - 27
  - 28
  - 29
  - 30
  - 31
  - 32
  - 33
  - 34
  - 35
  - 36
  - 37
  - 38
  - 39
  - 40
  - 41
  - 42
  - 43
  - 44
  - 45
  - 46
  - 47
  - 48
  - 49
  - 50
  - 51
  - 52
  - 53
  - 54
  - 55
  - 56
  - 57
  - 58
  - 59
  - 60
35. R Core Team (2020). R: A language and environment for statistical computing. R Foundation for Statistical Computing, Vienna, Austria. URL <https://www.R-project.org/>. [program].
36. Zhu Y, Edwards D, Mant J, et al. Characteristics, service use and mortality of clusters of multimorbid patients in England: a population-based study. *BMC medicine* 2020;18:1-11.
37. Blodgett J, Theou O, Kirkland S, et al. Frailty in NHANES: comparing the frailty index and phenotype. *Archives of gerontology and geriatrics* 2015;60(3):464-70.
38. Kojima G, Iliffe S, Walters K. Smoking as a predictor of frailty: a systematic review. *BMC geriatrics* 2015;15(1):1-7.
39. Ortolá R, García-Esquinas E, León-Muñoz LM, et al. Patterns of alcohol consumption and risk of frailty in community-dwelling older adults. *Journals of Gerontology Series A: Biomedical Sciences and Medical Sciences* 2016;71(2):251-58.
40. Kojima G, Liljas A, Iliffe S, et al. A systematic review and meta-analysis of prospective associations between alcohol consumption and incident frailty. *Age and ageing* 2018;47(1):26-34.
41. Hanlon P, Blane DN, Macdonald S, et al. Our response to rising frailty in younger people must address prevention burden. *The Lancet Healthy Longevity* 2021;2(5):e245.
42. Kojima G. Frailty as a predictor of hospitalisation among community-dwelling older people: a systematic review and meta-analysis. *J Epidemiol Community Health* 2016;70(7):722-29.
43. Mitnitski A, Fallah N, Rockwood M, et al. Transitions in cognitive status in relation to frailty in older adults: a comparison of three frailty measures. *The journal of nutrition, health & ageing* 2011;15(10):863-67.
44. Segaux L, Broussier A, Oubaya N, et al. Several frailty parameters highly prevalent in middle age (50–65) are independent predictors of adverse events. *Scientific reports* 2021;11(1):1-10.
45. Lu Z, Er Y, Zhan Y, et al. Association of frailty status with risk of fall among middle-aged and older adults in China: a nationally representative cohort study. *The journal of nutrition, health & ageing* 2021;25(8):985-92.
46. Graubard BI, Korn EL. Regression analysis with clustered data. *Statistics in medicine* 1994;13(5-7):509-22.
47. Hanlon P, Jani BD, Butterly E, et al. An analysis of frailty and multimorbidity in 20,566 UK Biobank participants with type 2 diabetes. *Communications medicine* 2021;1(1):1-9.
48. Spiers GF, Kunonga TP, Hall A, et al. Measuring frailty in younger populations: a rapid review of evidence. *BMJ open* 2021;11(3):e047051.
49. Kanters DM, Griffith LE, Hogan DB, et al. Assessing the measurement properties of a Frailty Index across the age spectrum in the Canadian Longitudinal Study on Aging. *J Epidemiol Community Health* 2017;71(8):794-99.

1  
2  
3 **Fig 1. State-wise prevalence of frailty, by sex and age group.** Individuals with frailty  
4 index  $\geq 0.25$  are defined as 'frail'. Prevalence estimates are weighted, using state-level  
5 individual sampling weights provided in data.  
6  
7  
8  
9

10  
11  
12  
13 **Fig 2. Forest plot of adjusted odds ratios (95% CI) for frailty, by participants'**  
14 **background characteristics.** MPCE: monthly per capita expenditure, which is defined as  
15 total monthly household consumption expenditure divided by household size. Food  
16 constraint refers to household food unavailability in the past 12 months, where household  
17 members either reduced their meal size, did not eat even though they were hungry, or did  
18 not eat for a whole day because enough food was not available in the household.  
19  
20  
21  
22  
23  
24  
25  
26  
27  
28  
29  
30  
31  
32  
33  
34  
35  
36  
37  
38  
39  
40  
41  
42  
43  
44  
45  
46  
47  
48  
49  
50  
51  
52  
53  
54  
55  
56  
57  
58  
59  
60

# Female 45-59 years

# Male 45-59 years

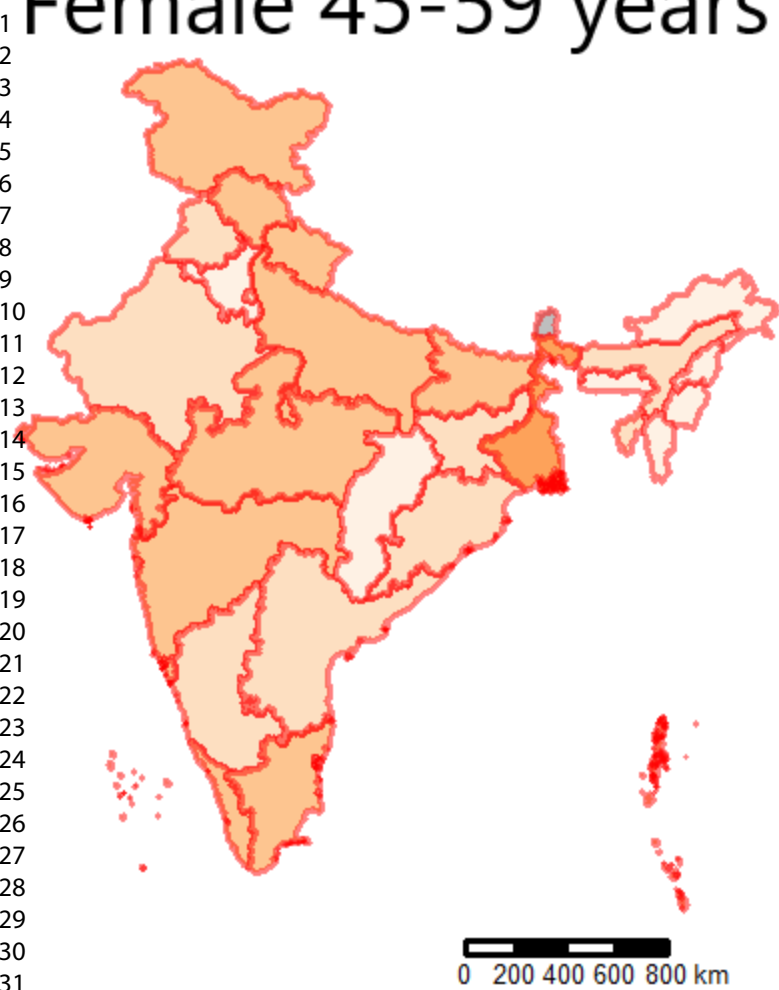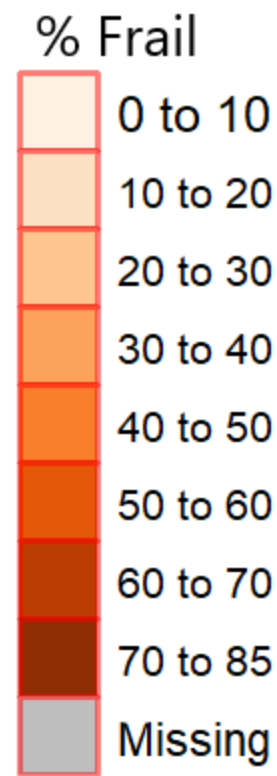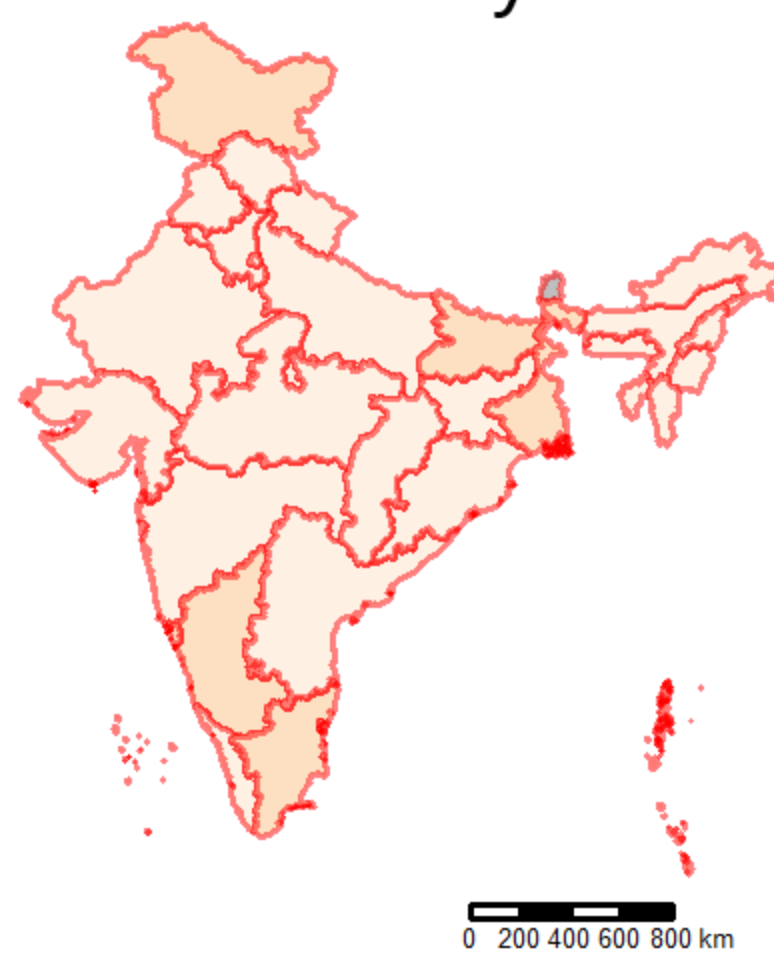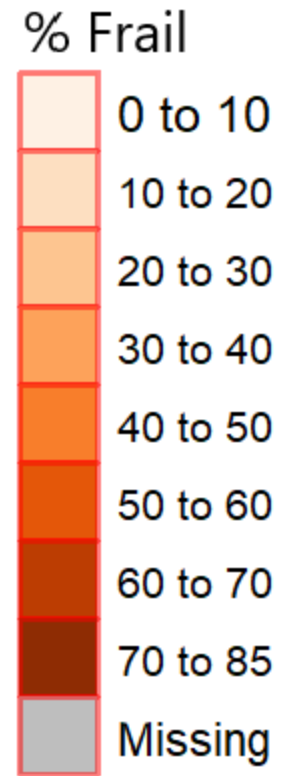

# Female 60-plus years

# Male 60-plus years

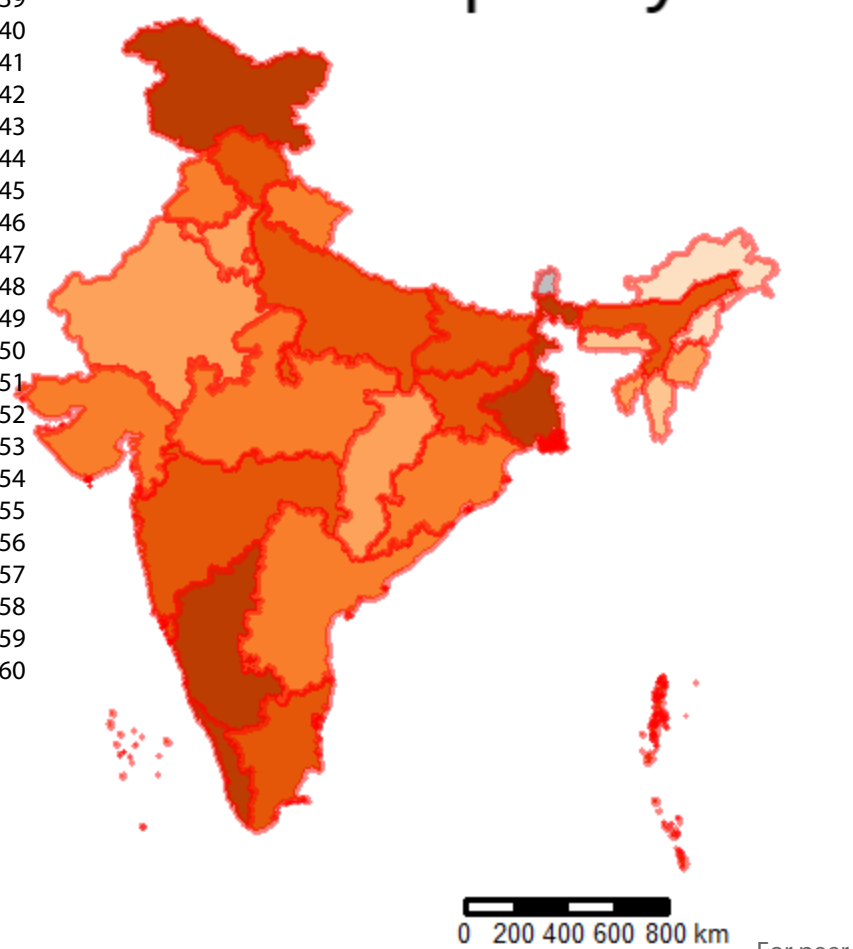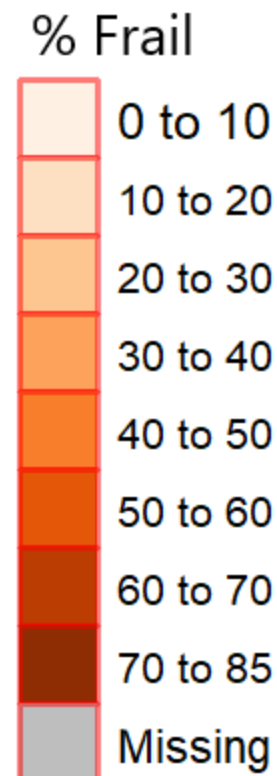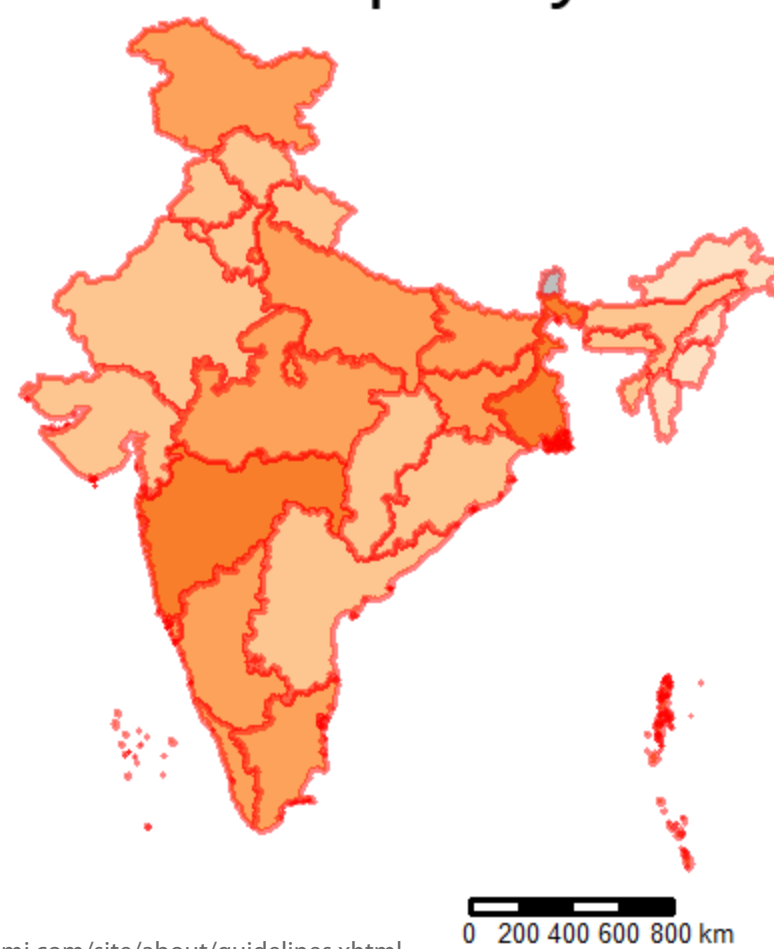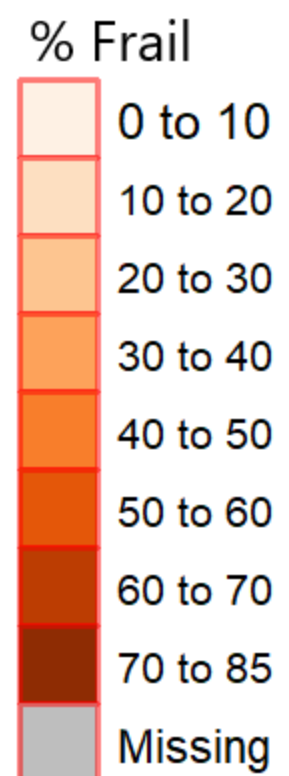

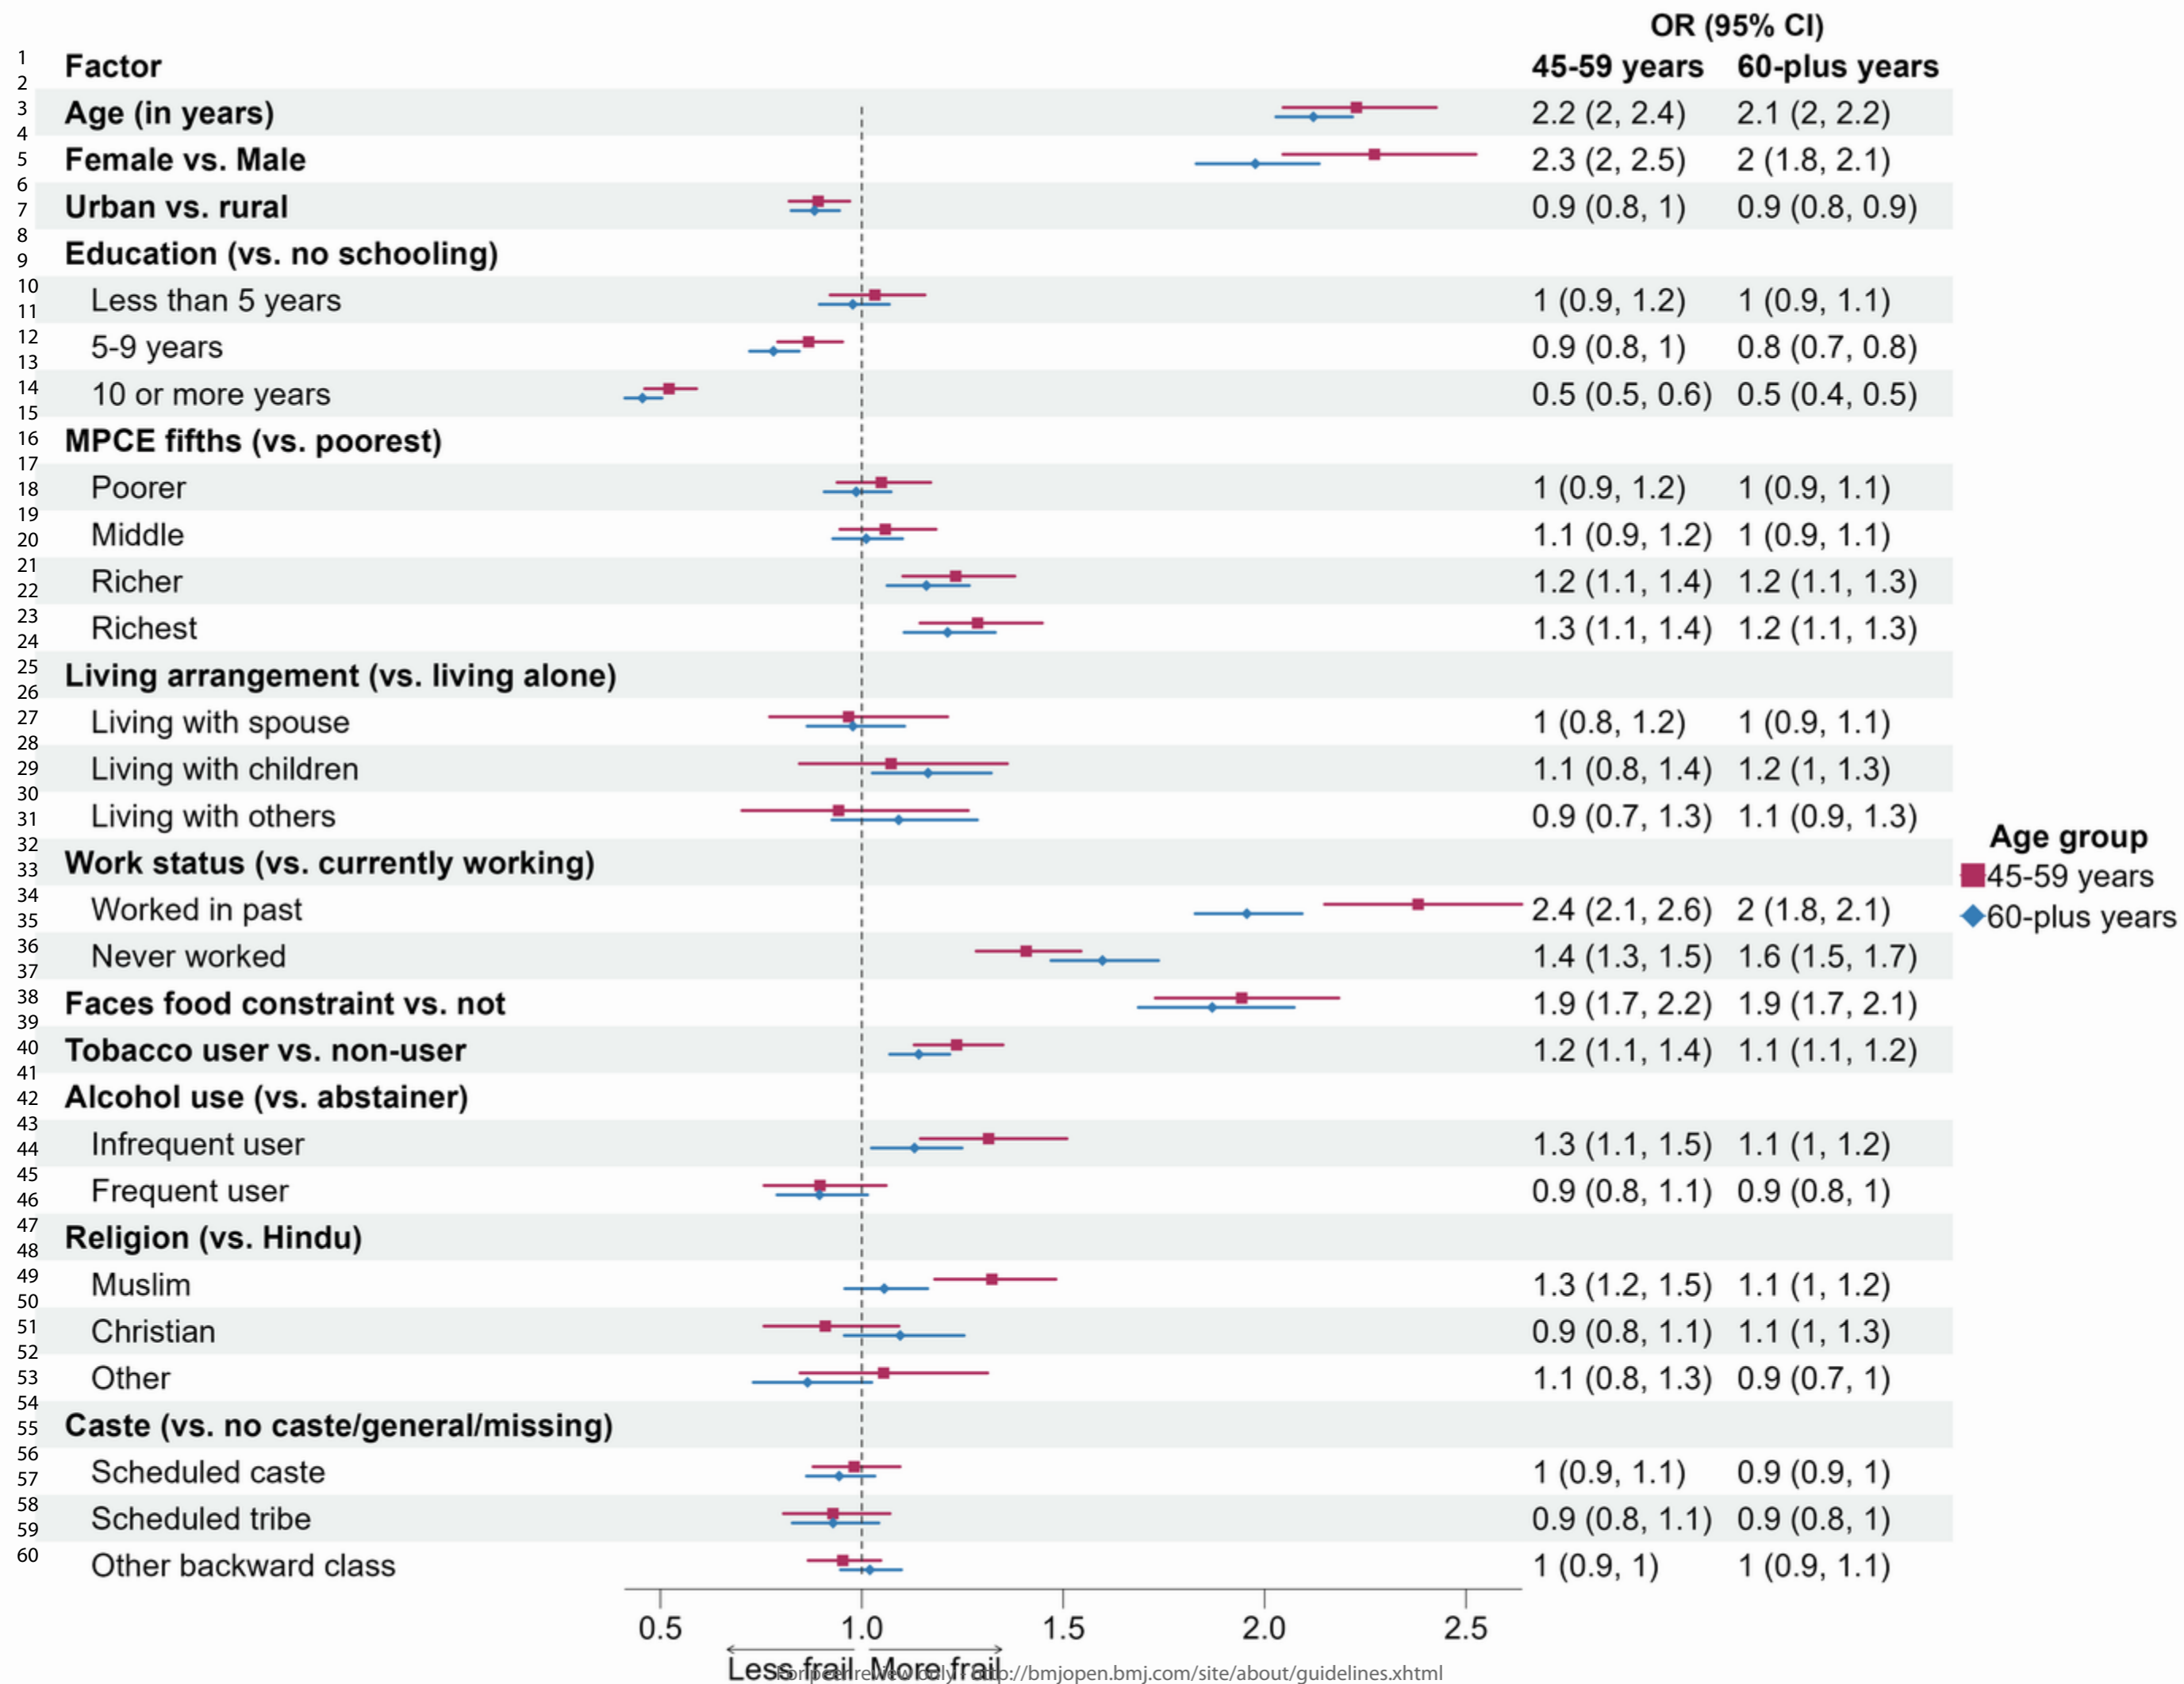

# Frailty among middle-aged and older women and men in India: Findings from Wave 1 of the Longitudinal Aging Study in India

## Supplementary Table & Figure legends

**S1 Table. Construction of deficits-based frailty index and distribution of deficit scores.**

**S2 Table. Definition of outcomes – hospitalization in last 12 months and any fall in past 2 years.**

**S3 Table. Construction of cognition score and distribution of its components.**

**S4 Table. Characteristics of excluded participants and participants included in various analyses.**

**S5 Table. Prevalence of frailty, overall and by participants' background characteristics.**

**S6 Table. Sex differences in distribution of frailty deficit scores.**

**S7 Table. Sex-specific associations between frailty and adverse outcomes.**

**S8 Table. Summary of different frailty measures, by sex and age groups.**

**S9 Table. Association between frailty (alternative definitions) and adverse outcomes.**

**S1 Fig. Flowchart presenting selection of participants for analyses.**

**S2 Fig. Distribution of frailty index and cognition score among 45-plus participants. A)** Frailty index had a mean value of 0.18 and standard deviation (SD) of 0.13, with values ranging from 0-0.83 and a median (IQR) of 0.14 (0.08, 0.25). The dotted line presents the cut-off 0.25. **B)** Composite cognition score value ranges from 4 to 43, with a mean of 27.01 (SD=6.36) and a median of 27 (IQR = 22,32). Poor cognition is defined as cognition score  $\leq$  18 (10<sup>th</sup> percentile marked as dotted line in the graph).

**S3 Fig. Missingness in deficit scores.** Mobility1:Walking 100 yards; Mobility2:Sitting for 2 hours or more; Mobility3:Getting up from a chair after sitting for long period; Mobility4:Climbing one flight of stairs without resting ; Mobility5:Stooping, kneeling or crouching; Mobility6:Reaching or extending arms above shoulder level (either arm); Mobility7:Pulling or pushing large objects; Mobility8:Lifting or carrying weights over 5 kilos, like a heavy bag of groceries; Mobility9:Picking up a coin from a table; Activities of Daily Living (ADL) 1:Dressing, including putting on chappals, shoes, etc.; ADL2:Walking across a room; ADL3:Bathing; ADL4:Eating; ADL5:Getting in or out of bed; ADL6:Using the toilet, including getting up and down; ADL7:Preparing a hot meal (cooking and serving); ADL8:Shopping for groceries; ADL9:Making telephone calls; ADL10:Taking medications; ADL11:Doing work around the house or garden; ADL12:Managing money, such as paying

1  
2  
3 bills and keeping track of expenses; ADL13:Getting around or finding address in unfamiliar  
4 place.  
5

6 **S4 Fig. Prevalence of frailty across states, in middle-aged and elderly men and**  
7 **women.** Individuals with frailty index > 0.21 were considered as frail. Prevalence estimates  
8 are weighted, using state-level individual sampling weights provided in data.  
9

10 **S5 Fig. Forest plot of adjusted odds ratios (95% CI) for frailty, by participants'**  
11 **background characteristics, using income as the economic indicator.** Annual per capita  
12 household income is used as the economic indicator, instead of monthly per capita  
13 consumption expenditure. Per capita household income is computed by aggregating income  
14 from all sources (agricultural and non-agricultural business, wage/salary, pension and  
15 transfers) and dividing by the number of household members.  
16  
17  
18  
19  
20  
21  
22  
23  
24  
25  
26  
27  
28  
29  
30  
31  
32  
33  
34  
35  
36  
37  
38  
39  
40  
41  
42  
43  
44  
45  
46  
47  
48  
49  
50  
51  
52  
53  
54  
55  
56  
57  
58  
59  
60

**S1 Table. Construction of deficits-based frailty index and distribution of deficit scores.**

| Domain/variable                                                  | Coding criteria                                                     | Questions                                                                                                                                                                                                                                                                                                                                                              | Distribution in adults 45 years or older* (N=65562) |               |
|------------------------------------------------------------------|---------------------------------------------------------------------|------------------------------------------------------------------------------------------------------------------------------------------------------------------------------------------------------------------------------------------------------------------------------------------------------------------------------------------------------------------------|-----------------------------------------------------|---------------|
|                                                                  |                                                                     |                                                                                                                                                                                                                                                                                                                                                                        | Value                                               | N (%)         |
| <b>General Health (Self-reported health) (1 deficit)</b>         | Very good = 0, Good = 0.25, Fair = 0.50, Poor = 0.75, Very poor = 1 | 1. Now I want to ask you about your general health. Overall, how is your health in general? Would you say it is very good, good, fair, poor, or very poor?<br>1. Very good<br>2. Good<br>3. Fair<br>4. Poor<br>5. Very poor                                                                                                                                            | Value                                               | N (%)         |
|                                                                  |                                                                     |                                                                                                                                                                                                                                                                                                                                                                        | 0                                                   | 3050 (4.65)   |
|                                                                  |                                                                     |                                                                                                                                                                                                                                                                                                                                                                        | 0.25                                                | 23628 (36.04) |
|                                                                  |                                                                     |                                                                                                                                                                                                                                                                                                                                                                        | 0.5                                                 | 26924 (41.07) |
|                                                                  |                                                                     |                                                                                                                                                                                                                                                                                                                                                                        | 0.75                                                | 9811 (14.96)  |
|                                                                  |                                                                     |                                                                                                                                                                                                                                                                                                                                                                        | 1                                                   | 1242 (1.89)   |
| Missing                                                          | 7 (1.38)                                                            |                                                                                                                                                                                                                                                                                                                                                                        |                                                     |               |
| <b>Self-reported medically diagnosed conditions (9 deficits)</b> |                                                                     |                                                                                                                                                                                                                                                                                                                                                                        |                                                     |               |
| (1) Arthritis                                                    | 1 if Yes to 1. and selected a. in 2.<br>0 otherwise                 | 1. Has any health professional ever diagnosed you with the following chronic conditions or diseases?<br>Arthritis or rheumatism, Osteoporosis or other bone/joint diseases.<br>1. Yes<br>2. No<br><br>2. Have you ever been diagnosed with the following bone/joint diseases/problems?<br>a. Arthritis<br>b. Rheumatism<br>c. Osteoporosis<br>d. Other, please specify | Value                                               | N (%)         |
|                                                                  |                                                                     |                                                                                                                                                                                                                                                                                                                                                                        | 0                                                   | 60065 (91.62) |
|                                                                  |                                                                     |                                                                                                                                                                                                                                                                                                                                                                        | 1                                                   | 5327 (8.13)   |
|                                                                  |                                                                     |                                                                                                                                                                                                                                                                                                                                                                        | Missing                                             | 170 (0.26)    |
| (2) Stroke                                                       | 1 if Yes to 1.<br>0 otherwise                                       | 1. Has any health professional ever diagnosed you with the following chronic conditions or diseases?<br>Stroke<br>1. Yes<br>2. No                                                                                                                                                                                                                                      | Value                                               | N (%)         |
|                                                                  |                                                                     |                                                                                                                                                                                                                                                                                                                                                                        | 0                                                   | 64195 (97.91) |
|                                                                  |                                                                     |                                                                                                                                                                                                                                                                                                                                                                        | 1                                                   | 1195 (1.82)   |
|                                                                  |                                                                     |                                                                                                                                                                                                                                                                                                                                                                        | Missing                                             | 172 (0.26)    |

| <p>(3) Angina</p> | <p>Angina is defined based on symptoms.</p> <p>Individuals classified as having angina were those who had a history of chest pain (answer "Yes" to question 1), set off by physical exertion (answer "Yes" to questions 2 or 3), forcing them to stop or slow down (question 4), with subsequent relief ("Yes" to question 5), within 10 minutes (question 6), and located in the sternum or the left anterior chest and left arm</p> | <p><b>Rose angina questionnaire:</b><sup>1</sup></p> <ol style="list-style-type: none"> <li>1. Do you ever have any pain or discomfort in your chest?             <ol style="list-style-type: none"> <li>1. Yes</li> <li>2. No</li> </ol> </li> <li>2. Do you get this pain or discomfort when you walk uphill or hurry?             <ol style="list-style-type: none"> <li>1. Yes</li> <li>2. No</li> <li>3. Unable to walk</li> </ol> </li> <li>3. Do you get it when you walk at an ordinary pace on the level?             <ol style="list-style-type: none"> <li>1. Yes</li> <li>2. No</li> </ol> </li> <li>4. When you get any pain or discomfort in your chest while walking or moving, what do you do?             <ol style="list-style-type: none"> <li>1. Stop</li> <li>2. Slow down</li> <li>3. Continue at the same pace</li> </ol> </li> <li>5. Does it go away when you stop moving?             <ol style="list-style-type: none"> <li>1. Yes</li> <li>2. No</li> </ol> </li> <li>6. How quickly the pain subsides when it occurs?             <ol style="list-style-type: none"> <li>1. 10 minutes or less</li> <li>2. More than 10 minutes</li> </ol> </li> <li>7. Where do you get this pain or discomfort? (figure)</li> </ol> | <table border="1"> <thead> <tr> <th>Value</th> <th>N (%)</th> </tr> </thead> <tbody> <tr> <td>0</td> <td>61336 (93.55)</td> </tr> <tr> <td>1</td> <td>4005 (6.11)</td> </tr> <tr> <td>Missing</td> <td>221 (0.34)</td> </tr> </tbody> </table> | Value | N (%) | 0 | 61336 (93.55) | 1 | 4005 (6.11) | Missing | 221 (0.34) |
|-------------------|---------------------------------------------------------------------------------------------------------------------------------------------------------------------------------------------------------------------------------------------------------------------------------------------------------------------------------------------------------------------------------------------------------------------------------------|----------------------------------------------------------------------------------------------------------------------------------------------------------------------------------------------------------------------------------------------------------------------------------------------------------------------------------------------------------------------------------------------------------------------------------------------------------------------------------------------------------------------------------------------------------------------------------------------------------------------------------------------------------------------------------------------------------------------------------------------------------------------------------------------------------------------------------------------------------------------------------------------------------------------------------------------------------------------------------------------------------------------------------------------------------------------------------------------------------------------------------------------------------------------------------------------------------------------------------------------------|------------------------------------------------------------------------------------------------------------------------------------------------------------------------------------------------------------------------------------------------|-------|-------|---|---------------|---|-------------|---------|------------|
| Value             | N (%)                                                                                                                                                                                                                                                                                                                                                                                                                                 |                                                                                                                                                                                                                                                                                                                                                                                                                                                                                                                                                                                                                                                                                                                                                                                                                                                                                                                                                                                                                                                                                                                                                                                                                                                    |                                                                                                                                                                                                                                                |       |       |   |               |   |             |         |            |
| 0                 | 61336 (93.55)                                                                                                                                                                                                                                                                                                                                                                                                                         |                                                                                                                                                                                                                                                                                                                                                                                                                                                                                                                                                                                                                                                                                                                                                                                                                                                                                                                                                                                                                                                                                                                                                                                                                                                    |                                                                                                                                                                                                                                                |       |       |   |               |   |             |         |            |
| 1                 | 4005 (6.11)                                                                                                                                                                                                                                                                                                                                                                                                                           |                                                                                                                                                                                                                                                                                                                                                                                                                                                                                                                                                                                                                                                                                                                                                                                                                                                                                                                                                                                                                                                                                                                                                                                                                                                    |                                                                                                                                                                                                                                                |       |       |   |               |   |             |         |            |
| Missing           | 221 (0.34)                                                                                                                                                                                                                                                                                                                                                                                                                            |                                                                                                                                                                                                                                                                                                                                                                                                                                                                                                                                                                                                                                                                                                                                                                                                                                                                                                                                                                                                                                                                                                                                                                                                                                                    |                                                                                                                                                                                                                                                |       |       |   |               |   |             |         |            |



1  
2  
3  
4  
5  
6  
7  
8  
9  
10  
11  
12  
13  
14  
15  
16  
17  
18  
19  
20  
21  
22  
23  
24  
25  
26  
27  
28  
29  
30  
31  
32  
33  
34  
35  
36  
37  
38  
39  
40  
41  
42  
43  
44  
45  
46

|              | (quadrants 4, 8, or 5 and 6 in question 7).<br><br>1 if Yes to above conditions specified.<br>0 otherwise |                                                                                                                                                                                                                                                                                                                                                                                                                                         |                                                                                                                                                                                                                                                 |       |       |   |               |   |              |         |            |
|--------------|-----------------------------------------------------------------------------------------------------------|-----------------------------------------------------------------------------------------------------------------------------------------------------------------------------------------------------------------------------------------------------------------------------------------------------------------------------------------------------------------------------------------------------------------------------------------|-------------------------------------------------------------------------------------------------------------------------------------------------------------------------------------------------------------------------------------------------|-------|-------|---|---------------|---|--------------|---------|------------|
| (4) Diabetes | 1 if Yes to 1.<br>0 otherwise                                                                             | 1. Has any health professional ever diagnosed you with the following chronic conditions or diseases?<br>Diabetes<br>1. Yes<br>2. No                                                                                                                                                                                                                                                                                                     | <table border="1"> <thead> <tr> <th>Value</th> <th>N (%)</th> </tr> </thead> <tbody> <tr> <td>0</td> <td>56952 (86.87)</td> </tr> <tr> <td>1</td> <td>8429 (12.86)</td> </tr> <tr> <td>Missing</td> <td>181 (0.28)</td> </tr> </tbody> </table> | Value | N (%) | 0 | 56952 (86.87) | 1 | 8429 (12.86) | Missing | 181 (0.28) |
| Value        | N (%)                                                                                                     |                                                                                                                                                                                                                                                                                                                                                                                                                                         |                                                                                                                                                                                                                                                 |       |       |   |               |   |              |         |            |
| 0            | 56952 (86.87)                                                                                             |                                                                                                                                                                                                                                                                                                                                                                                                                                         |                                                                                                                                                                                                                                                 |       |       |   |               |   |              |         |            |
| 1            | 8429 (12.86)                                                                                              |                                                                                                                                                                                                                                                                                                                                                                                                                                         |                                                                                                                                                                                                                                                 |       |       |   |               |   |              |         |            |
| Missing      | 181 (0.28)                                                                                                |                                                                                                                                                                                                                                                                                                                                                                                                                                         |                                                                                                                                                                                                                                                 |       |       |   |               |   |              |         |            |
| (5) COPD     | 1 if Yes to 1. and selected a. in 2.<br>0 otherwise                                                       | 1. Has any health professional ever diagnosed you with the following chronic conditions or diseases?<br>Chronic lung disease such as asthma, chronic obstructive pulmonary disease/Chronic bronchitis or other chronic lung problems.<br>1. Yes<br>2. No<br><br>2. Which type of chronic lung disease do you have?<br>a. Chronic obstructive pulmonary disease (COPD)<br>b. Chronic Bronchitis<br>c. Asthma<br>d. Other, please specify | <table border="1"> <thead> <tr> <th>Value</th> <th>N (%)</th> </tr> </thead> <tbody> <tr> <td>0</td> <td>64667 (98.63)</td> </tr> <tr> <td>1</td> <td>724 (1.10)</td> </tr> <tr> <td>Missing</td> <td>171 (0.26)</td> </tr> </tbody> </table>   | Value | N (%) | 0 | 64667 (98.63) | 1 | 724 (1.10)   | Missing | 171 (0.26) |
| Value        | N (%)                                                                                                     |                                                                                                                                                                                                                                                                                                                                                                                                                                         |                                                                                                                                                                                                                                                 |       |       |   |               |   |              |         |            |
| 0            | 64667 (98.63)                                                                                             |                                                                                                                                                                                                                                                                                                                                                                                                                                         |                                                                                                                                                                                                                                                 |       |       |   |               |   |              |         |            |
| 1            | 724 (1.10)                                                                                                |                                                                                                                                                                                                                                                                                                                                                                                                                                         |                                                                                                                                                                                                                                                 |       |       |   |               |   |              |         |            |
| Missing      | 171 (0.26)                                                                                                |                                                                                                                                                                                                                                                                                                                                                                                                                                         |                                                                                                                                                                                                                                                 |       |       |   |               |   |              |         |            |
| (6) Asthma   | 1 if Yes to 1. and selected c. in 2.<br>0 otherwise                                                       | 1. Has any health professional ever diagnosed you with the following chronic conditions or diseases?<br>Chronic lung disease such as asthma, chronic obstructive pulmonary disease/Chronic bronchitis or other chronic lung problems.<br>1. Yes<br>2. No<br><br>2. Which type of chronic lung disease do you have?                                                                                                                      | <table border="1"> <thead> <tr> <th>Value</th> <th>N (%)</th> </tr> </thead> <tbody> <tr> <td>0</td> <td>62830 (95.83)</td> </tr> <tr> <td>1</td> <td>2561 (3.91)</td> </tr> <tr> <td>Missing</td> <td>171 (0.26)</td> </tr> </tbody> </table>  | Value | N (%) | 0 | 62830 (95.83) | 1 | 2561 (3.91)  | Missing | 171 (0.26) |
| Value        | N (%)                                                                                                     |                                                                                                                                                                                                                                                                                                                                                                                                                                         |                                                                                                                                                                                                                                                 |       |       |   |               |   |              |         |            |
| 0            | 62830 (95.83)                                                                                             |                                                                                                                                                                                                                                                                                                                                                                                                                                         |                                                                                                                                                                                                                                                 |       |       |   |               |   |              |         |            |
| 1            | 2561 (3.91)                                                                                               |                                                                                                                                                                                                                                                                                                                                                                                                                                         |                                                                                                                                                                                                                                                 |       |       |   |               |   |              |         |            |
| Missing      | 171 (0.26)                                                                                                |                                                                                                                                                                                                                                                                                                                                                                                                                                         |                                                                                                                                                                                                                                                 |       |       |   |               |   |              |         |            |

|                |                                                                                                                                                                                                                                                                                                                                                                                           | <p>a. Chronic obstructive pulmonary disease (COPD)</p> <p>b. Chronic Bronchitis</p> <p>c. Asthma</p> <p>d. Other, please specify</p>                                                                                                                                                                                                                                                                                                                                                                                                                                                                                                                                                                                                                                                                                                                                                                                                                                                  |                                                                                                                                                                                                                                                 |       |       |   |               |   |             |         |             |
|----------------|-------------------------------------------------------------------------------------------------------------------------------------------------------------------------------------------------------------------------------------------------------------------------------------------------------------------------------------------------------------------------------------------|---------------------------------------------------------------------------------------------------------------------------------------------------------------------------------------------------------------------------------------------------------------------------------------------------------------------------------------------------------------------------------------------------------------------------------------------------------------------------------------------------------------------------------------------------------------------------------------------------------------------------------------------------------------------------------------------------------------------------------------------------------------------------------------------------------------------------------------------------------------------------------------------------------------------------------------------------------------------------------------|-------------------------------------------------------------------------------------------------------------------------------------------------------------------------------------------------------------------------------------------------|-------|-------|---|---------------|---|-------------|---------|-------------|
| (7) Depression | <p>Depression is defined based on symptoms using CIDI scale.</p> <p>a) Calculated appetite status:<br/>1 if Yes to either 6. or 7.<br/>0 otherwise</p> <p>b) Calculated CIDI score:<br/>1 is summation of 4, 5, appetite status, 8, 9, 10, 11</p> <p>c) Finally, depression status:<br/>1 if 1. is Yes &amp; selected either 1. or 2. category from 2. &amp; selected either 1. or 2.</p> | <p>1. During the last 12 months, was there ever a time when you felt sad, blue, or depressed for two weeks or more in a row?</p> <p>1. Yes<br/>2. No</p> <p>2. Please think of the two-week period during the last 12 months when these feelings were worst. During that time did the feelings of being sad, blue, or depressed usually last all day long, most of the day, about half the day, or less than half the day?</p> <p>1. All day long<br/>2. Most of the day<br/>3. About half the day<br/>4. Less than half the day</p> <p>3. During those two weeks, did you feel this way every day, almost every day, or less often than that?</p> <p>1. Every day<br/>2. Almost every day<br/>3. Less often</p> <p>Thinking about those same two weeks,</p> <p>4. Did you lose interest in most things?</p> <p>1. Yes<br/>2. No</p> <p>5. Did you ever feel more tired out or low in energy than is usual for you?</p> <p>1. Yes<br/>2. No</p> <p>6. Did you lose your appetite?</p> | <table border="1"> <thead> <tr> <th>Value</th> <th>N (%)</th> </tr> </thead> <tbody> <tr> <td>0</td> <td>60228 (91.86)</td> </tr> <tr> <td>1</td> <td>4058 (6.19)</td> </tr> <tr> <td>Missing</td> <td>1276 (1.95)</td> </tr> </tbody> </table> | Value | N (%) | 0 | 60228 (91.86) | 1 | 4058 (6.19) | Missing | 1276 (1.95) |
| Value          | N (%)                                                                                                                                                                                                                                                                                                                                                                                     |                                                                                                                                                                                                                                                                                                                                                                                                                                                                                                                                                                                                                                                                                                                                                                                                                                                                                                                                                                                       |                                                                                                                                                                                                                                                 |       |       |   |               |   |             |         |             |
| 0              | 60228 (91.86)                                                                                                                                                                                                                                                                                                                                                                             |                                                                                                                                                                                                                                                                                                                                                                                                                                                                                                                                                                                                                                                                                                                                                                                                                                                                                                                                                                                       |                                                                                                                                                                                                                                                 |       |       |   |               |   |             |         |             |
| 1              | 4058 (6.19)                                                                                                                                                                                                                                                                                                                                                                               |                                                                                                                                                                                                                                                                                                                                                                                                                                                                                                                                                                                                                                                                                                                                                                                                                                                                                                                                                                                       |                                                                                                                                                                                                                                                 |       |       |   |               |   |             |         |             |
| Missing        | 1276 (1.95)                                                                                                                                                                                                                                                                                                                                                                               |                                                                                                                                                                                                                                                                                                                                                                                                                                                                                                                                                                                                                                                                                                                                                                                                                                                                                                                                                                                       |                                                                                                                                                                                                                                                 |       |       |   |               |   |             |         |             |

1  
2  
3  
4  
5  
6  
7  
8  
9  
10  
11  
12  
13  
14  
15  
16  
17  
18  
19  
20  
21  
22  
23  
24  
25  
26  
27  
28  
29  
30  
31  
32  
33  
34  
35  
36  
37  
38  
39  
40  
41  
42  
43  
44  
45  
46

|                  | category from 3. & CIDI score is >= 3. 0 otherwise                                                                                 | <p>1. Yes<br/>2. No</p> <p>7. Did your appetite increase during those same two weeks?<br/>1. Yes<br/>2. No</p> <p>8. During the same two-week period did you have a lot more trouble concentrating than usual?<br/>1. Yes<br/>2. No</p> <p>9. People sometimes feel down on themselves, and no good or worthless. During that two-week period, did you feel this way?<br/>1. Yes<br/>2. No</p> <p>10. Did you think a lot about death – either your own, someone else’s, or death in general – during those two weeks?<br/>1. Yes<br/>2. No</p> <p>11. Did you have more trouble falling asleep than you usually do during those two weeks?<br/>1. Yes<br/>2. No</p> |                                                                                                                                                                                                                                                  |       |       |   |               |   |               |         |            |
|------------------|------------------------------------------------------------------------------------------------------------------------------------|----------------------------------------------------------------------------------------------------------------------------------------------------------------------------------------------------------------------------------------------------------------------------------------------------------------------------------------------------------------------------------------------------------------------------------------------------------------------------------------------------------------------------------------------------------------------------------------------------------------------------------------------------------------------|--------------------------------------------------------------------------------------------------------------------------------------------------------------------------------------------------------------------------------------------------|-------|-------|---|---------------|---|---------------|---------|------------|
| (8) Hypertension | <p>Hypertension is defined as either self-reported or BP &gt;=140/90</p> <p>1 if Yes to 1. or 2.is &gt; =140 or 3. is &gt;=90,</p> | <p>1. Has any health professional ever diagnosed you with the following chronic conditions or diseases?<br/>Hypertension or high blood pressure.<br/>1. Yes<br/>2. No</p> <p>When the device is in the correct position and the R is relaxed, press the button to Start. Measure blood pressure and pulse three times with one minute gap between each of the measurements. No need to</p>                                                                                                                                                                                                                                                                           | <table border="1"> <thead> <tr> <th>Value</th> <th>N (%)</th> </tr> </thead> <tbody> <tr> <td>0</td> <td>34246 (52.23)</td> </tr> <tr> <td>1</td> <td>31143 (47.50)</td> </tr> <tr> <td>Missing</td> <td>173 (0.26)</td> </tr> </tbody> </table> | Value | N (%) | 0 | 34246 (52.23) | 1 | 31143 (47.50) | Missing | 173 (0.26) |
| Value            | N (%)                                                                                                                              |                                                                                                                                                                                                                                                                                                                                                                                                                                                                                                                                                                                                                                                                      |                                                                                                                                                                                                                                                  |       |       |   |               |   |               |         |            |
| 0                | 34246 (52.23)                                                                                                                      |                                                                                                                                                                                                                                                                                                                                                                                                                                                                                                                                                                                                                                                                      |                                                                                                                                                                                                                                                  |       |       |   |               |   |               |         |            |
| 1                | 31143 (47.50)                                                                                                                      |                                                                                                                                                                                                                                                                                                                                                                                                                                                                                                                                                                                                                                                                      |                                                                                                                                                                                                                                                  |       |       |   |               |   |               |         |            |
| Missing          | 173 (0.26)                                                                                                                         |                                                                                                                                                                                                                                                                                                                                                                                                                                                                                                                                                                                                                                                                      |                                                                                                                                                                                                                                                  |       |       |   |               |   |               |         |            |

|                                        | 0 otherwise                                             | <p>remove the cuffs and the device between the measurements. Record measurements in CAPI. Enter 993 in systolic, diastolic and pulse reading if an unresolvable equipment problem occurs. If the average systolic reading obtained is greater than 180 and average diastolic reading is greater than 110 or either of it, fill the referral letter and give to respondent and stop the test immediately.</p> <p>2. Systolic readings: average of last two readings.<br/>3. Diastolic readings: average of last two readings.</p> |                                                                                                                                                                                                                                                  |       |       |   |               |   |               |         |            |
|----------------------------------------|---------------------------------------------------------|----------------------------------------------------------------------------------------------------------------------------------------------------------------------------------------------------------------------------------------------------------------------------------------------------------------------------------------------------------------------------------------------------------------------------------------------------------------------------------------------------------------------------------|--------------------------------------------------------------------------------------------------------------------------------------------------------------------------------------------------------------------------------------------------|-------|-------|---|---------------|---|---------------|---------|------------|
| (9) Cataract                           | 1 if Yes to 1. and selected b. in 2.<br>0 otherwise     | <p>1. Now I have some questions about your eyesight. Have you ever been diagnosed with any eye or vision problem or condition, including ordinary near sightedness or farsightedness?</p> <p>1. Yes<br/>2. No</p> <p>2. With which problem or condition were you diagnosed?</p> <p>a. Presbyopia<br/>b. Cataract<br/>c. Glaucoma<br/>d. Myopia (Nearsightedness)<br/>e. Hypermetropia (Farsightedness)<br/>f. Other, please specify</p>                                                                                          | <table border="1"> <thead> <tr> <th>Value</th> <th>N (%)</th> </tr> </thead> <tbody> <tr> <td>0</td> <td>57291 (87.38)</td> </tr> <tr> <td>1</td> <td>8088 (12.34)</td> </tr> <tr> <td>Missing</td> <td>183 (0.28)</td> </tr> </tbody> </table>  | Value | N (%) | 0 | 57291 (87.38) | 1 | 8088 (12.34)  | Missing | 183 (0.28) |
| Value                                  | N (%)                                                   |                                                                                                                                                                                                                                                                                                                                                                                                                                                                                                                                  |                                                                                                                                                                                                                                                  |       |       |   |               |   |               |         |            |
| 0                                      | 57291 (87.38)                                           |                                                                                                                                                                                                                                                                                                                                                                                                                                                                                                                                  |                                                                                                                                                                                                                                                  |       |       |   |               |   |               |         |            |
| 1                                      | 8088 (12.34)                                            |                                                                                                                                                                                                                                                                                                                                                                                                                                                                                                                                  |                                                                                                                                                                                                                                                  |       |       |   |               |   |               |         |            |
| Missing                                | 183 (0.28)                                              |                                                                                                                                                                                                                                                                                                                                                                                                                                                                                                                                  |                                                                                                                                                                                                                                                  |       |       |   |               |   |               |         |            |
| <b>Medical symptoms (4 deficits)</b>   |                                                         |                                                                                                                                                                                                                                                                                                                                                                                                                                                                                                                                  |                                                                                                                                                                                                                                                  |       |       |   |               |   |               |         |            |
| 1) Bodily aches or pains did you have? | 1 if Yes to 1. & Either a., b., c. in 2.<br>0 otherwise | <p>1. Are you often troubled with pain?</p> <p>1. Yes<br/>2. No</p> <p>2. Do you take any medication or therapy to get relief from the pain [Multiple answers are allowed]?</p> <p>a. Yes, analgesics (Oral/ Injectable)</p>                                                                                                                                                                                                                                                                                                     | <table border="1"> <thead> <tr> <th>Value</th> <th>N (%)</th> </tr> </thead> <tbody> <tr> <td>0</td> <td>48290 (73.66)</td> </tr> <tr> <td>1</td> <td>17042 (25.99)</td> </tr> <tr> <td>Missing</td> <td>230 (0.35)</td> </tr> </tbody> </table> | Value | N (%) | 0 | 48290 (73.66) | 1 | 17042 (25.99) | Missing | 230 (0.35) |
| Value                                  | N (%)                                                   |                                                                                                                                                                                                                                                                                                                                                                                                                                                                                                                                  |                                                                                                                                                                                                                                                  |       |       |   |               |   |               |         |            |
| 0                                      | 48290 (73.66)                                           |                                                                                                                                                                                                                                                                                                                                                                                                                                                                                                                                  |                                                                                                                                                                                                                                                  |       |       |   |               |   |               |         |            |
| 1                                      | 17042 (25.99)                                           |                                                                                                                                                                                                                                                                                                                                                                                                                                                                                                                                  |                                                                                                                                                                                                                                                  |       |       |   |               |   |               |         |            |
| Missing                                | 230 (0.35)                                              |                                                                                                                                                                                                                                                                                                                                                                                                                                                                                                                                  |                                                                                                                                                                                                                                                  |       |       |   |               |   |               |         |            |

1  
2  
3  
4  
5  
6  
7  
8  
9  
10  
11  
12  
13  
14  
15  
16  
17  
18  
19  
20  
21  
22  
23  
24  
25  
26  
27  
28  
29  
30  
31  
32  
33  
34  
35  
36  
37  
38  
39  
40  
41  
42  
43  
44  
45  
46

|                                                                          |                                                                                                                                   | <p>b. Yes, therapy(ies)</p> <p>c. Local/external application (Ointment, cream, gel, balm, spray, oil, etc.)</p> <p>d. None</p>                                                                                                                                                                                                                                                                                                                                                                                                                                                                                                                                                                                                                                                      |                                                                                                                                                                                                                                                                                                                                                                                           |       |       |   |               |      |               |         |               |      |              |   |            |         |            |
|--------------------------------------------------------------------------|-----------------------------------------------------------------------------------------------------------------------------------|-------------------------------------------------------------------------------------------------------------------------------------------------------------------------------------------------------------------------------------------------------------------------------------------------------------------------------------------------------------------------------------------------------------------------------------------------------------------------------------------------------------------------------------------------------------------------------------------------------------------------------------------------------------------------------------------------------------------------------------------------------------------------------------|-------------------------------------------------------------------------------------------------------------------------------------------------------------------------------------------------------------------------------------------------------------------------------------------------------------------------------------------------------------------------------------------|-------|-------|---|---------------|------|---------------|---------|---------------|------|--------------|---|------------|---------|------------|
| 2) Problem did you have with sleeping?                                   | <p>1 if responded 4. Frequently (5 or more nights per week), for answering any of the 4 questions listed.</p> <p>0 otherwise.</p> | <p>Now I would like to ask you a few questions about your sleep during the past 1 month.</p> <p>How often do you...? Would you say Never, Rarely (1-2 nights per week), Occasionally (3-4 nights per week), or Frequently (5 or more nights per week)?</p> <p>1. Never</p> <p>2. Rarely (1-2 nights per week)</p> <p>3. Occasionally (3-4 nights per week)</p> <p>4. Frequently (5 or more nights per week)</p> <p>1. How often do you have trouble falling asleep?</p> <p>2. How often did you wake up during the night and had trouble getting back to sleep?</p> <p>3. How often did you wake up too early in the morning and were not being able to fall asleep again?</p> <p>4. How often did you feel unrested during the day, no matter how many hours of sleep you had?</p> | <table border="1"> <thead> <tr> <th>Value</th> <th>N (%)</th> </tr> </thead> <tbody> <tr> <td>0</td> <td>57554 (87.79)</td> </tr> <tr> <td>1</td> <td>7786 (11.88)</td> </tr> <tr> <td>Missing</td> <td>222 (0.34)</td> </tr> </tbody> </table>                                                                                                                                           | Value | N (%) | 0 | 57554 (87.79) | 1    | 7786 (11.88)  | Missing | 222 (0.34)    |      |              |   |            |         |            |
| Value                                                                    | N (%)                                                                                                                             |                                                                                                                                                                                                                                                                                                                                                                                                                                                                                                                                                                                                                                                                                                                                                                                     |                                                                                                                                                                                                                                                                                                                                                                                           |       |       |   |               |      |               |         |               |      |              |   |            |         |            |
| 0                                                                        | 57554 (87.79)                                                                                                                     |                                                                                                                                                                                                                                                                                                                                                                                                                                                                                                                                                                                                                                                                                                                                                                                     |                                                                                                                                                                                                                                                                                                                                                                                           |       |       |   |               |      |               |         |               |      |              |   |            |         |            |
| 1                                                                        | 7786 (11.88)                                                                                                                      |                                                                                                                                                                                                                                                                                                                                                                                                                                                                                                                                                                                                                                                                                                                                                                                     |                                                                                                                                                                                                                                                                                                                                                                                           |       |       |   |               |      |               |         |               |      |              |   |            |         |            |
| Missing                                                                  | 222 (0.34)                                                                                                                        |                                                                                                                                                                                                                                                                                                                                                                                                                                                                                                                                                                                                                                                                                                                                                                                     |                                                                                                                                                                                                                                                                                                                                                                                           |       |       |   |               |      |               |         |               |      |              |   |            |         |            |
| 3) Difficulty did you have in seeing (person or object) across the road? | <p>Very good = 0, Good = 0.25, Fair = 0.50, Poor = 0.75, Very poor = 1</p>                                                        | <p>1. How good is your eyesight for seeing things at a distance, like recognizing a person across the street (or 20 meters away) whether or not you wear glasses, contacts, or corrective lenses?</p> <p>1. Very good</p> <p>2. Good</p> <p>3. Fair</p> <p>4. Poor</p> <p>5. Very poor</p>                                                                                                                                                                                                                                                                                                                                                                                                                                                                                          | <table border="1"> <thead> <tr> <th>Value</th> <th>N (%)</th> </tr> </thead> <tbody> <tr> <td>0</td> <td>4142 (6.32)</td> </tr> <tr> <td>0.25</td> <td>25786 (39.33)</td> </tr> <tr> <td>0.5</td> <td>25991 (39.64)</td> </tr> <tr> <td>0.75</td> <td>8472 (12.92)</td> </tr> <tr> <td>1</td> <td>966 (1.47)</td> </tr> <tr> <td>Missing</td> <td>205 (0.31)</td> </tr> </tbody> </table> | Value | N (%) | 0 | 4142 (6.32)   | 0.25 | 25786 (39.33) | 0.5     | 25991 (39.64) | 0.75 | 8472 (12.92) | 1 | 966 (1.47) | Missing | 205 (0.31) |
| Value                                                                    | N (%)                                                                                                                             |                                                                                                                                                                                                                                                                                                                                                                                                                                                                                                                                                                                                                                                                                                                                                                                     |                                                                                                                                                                                                                                                                                                                                                                                           |       |       |   |               |      |               |         |               |      |              |   |            |         |            |
| 0                                                                        | 4142 (6.32)                                                                                                                       |                                                                                                                                                                                                                                                                                                                                                                                                                                                                                                                                                                                                                                                                                                                                                                                     |                                                                                                                                                                                                                                                                                                                                                                                           |       |       |   |               |      |               |         |               |      |              |   |            |         |            |
| 0.25                                                                     | 25786 (39.33)                                                                                                                     |                                                                                                                                                                                                                                                                                                                                                                                                                                                                                                                                                                                                                                                                                                                                                                                     |                                                                                                                                                                                                                                                                                                                                                                                           |       |       |   |               |      |               |         |               |      |              |   |            |         |            |
| 0.5                                                                      | 25991 (39.64)                                                                                                                     |                                                                                                                                                                                                                                                                                                                                                                                                                                                                                                                                                                                                                                                                                                                                                                                     |                                                                                                                                                                                                                                                                                                                                                                                           |       |       |   |               |      |               |         |               |      |              |   |            |         |            |
| 0.75                                                                     | 8472 (12.92)                                                                                                                      |                                                                                                                                                                                                                                                                                                                                                                                                                                                                                                                                                                                                                                                                                                                                                                                     |                                                                                                                                                                                                                                                                                                                                                                                           |       |       |   |               |      |               |         |               |      |              |   |            |         |            |
| 1                                                                        | 966 (1.47)                                                                                                                        |                                                                                                                                                                                                                                                                                                                                                                                                                                                                                                                                                                                                                                                                                                                                                                                     |                                                                                                                                                                                                                                                                                                                                                                                           |       |       |   |               |      |               |         |               |      |              |   |            |         |            |
| Missing                                                                  | 205 (0.31)                                                                                                                        |                                                                                                                                                                                                                                                                                                                                                                                                                                                                                                                                                                                                                                                                                                                                                                                     |                                                                                                                                                                                                                                                                                                                                                                                           |       |       |   |               |      |               |         |               |      |              |   |            |         |            |
| 4) Difficulty did you have in seeing                                     | <p>Very good = 0, Good = 0.25,</p>                                                                                                | <p>1. How good is your eyesight for seeing things up close, like reading ordinary newspaper print whether or not you wear glasses, contacts, or corrective lenses</p> <p>1. Very good</p>                                                                                                                                                                                                                                                                                                                                                                                                                                                                                                                                                                                           | <table border="1"> <thead> <tr> <th>Value</th> <th>N (%)</th> </tr> </thead> <tbody> <tr> <td>0</td> <td>3262 (4.98)</td> </tr> <tr> <td>0.25</td> <td>22743 (34.69)</td> </tr> <tr> <td>0.5</td> <td>28024 (42.74)</td> </tr> </tbody> </table>                                                                                                                                          | Value | N (%) | 0 | 3262 (4.98)   | 0.25 | 22743 (34.69) | 0.5     | 28024 (42.74) |      |              |   |            |         |            |
| Value                                                                    | N (%)                                                                                                                             |                                                                                                                                                                                                                                                                                                                                                                                                                                                                                                                                                                                                                                                                                                                                                                                     |                                                                                                                                                                                                                                                                                                                                                                                           |       |       |   |               |      |               |         |               |      |              |   |            |         |            |
| 0                                                                        | 3262 (4.98)                                                                                                                       |                                                                                                                                                                                                                                                                                                                                                                                                                                                                                                                                                                                                                                                                                                                                                                                     |                                                                                                                                                                                                                                                                                                                                                                                           |       |       |   |               |      |               |         |               |      |              |   |            |         |            |
| 0.25                                                                     | 22743 (34.69)                                                                                                                     |                                                                                                                                                                                                                                                                                                                                                                                                                                                                                                                                                                                                                                                                                                                                                                                     |                                                                                                                                                                                                                                                                                                                                                                                           |       |       |   |               |      |               |         |               |      |              |   |            |         |            |
| 0.5                                                                      | 28024 (42.74)                                                                                                                     |                                                                                                                                                                                                                                                                                                                                                                                                                                                                                                                                                                                                                                                                                                                                                                                     |                                                                                                                                                                                                                                                                                                                                                                                           |       |       |   |               |      |               |         |               |      |              |   |            |         |            |

|                                                          |                                               |                                                                                                                                                                                            |         |               |
|----------------------------------------------------------|-----------------------------------------------|--------------------------------------------------------------------------------------------------------------------------------------------------------------------------------------------|---------|---------------|
| an object at arm's length?                               | Fair = 0.50,<br>Poor = 0.75,<br>Very poor = 1 | 2. Good<br>3. Fair<br>4. Poor<br>5. Very poor                                                                                                                                              | 0.75    | 10198 (15.55) |
|                                                          |                                               |                                                                                                                                                                                            | 1       | 1072 (1.64)   |
|                                                          |                                               |                                                                                                                                                                                            | Missing | 263 (0.4)     |
| <b>Functional assessment (9 deficits)</b>                | 1 = Yes,<br>0 = No                            | 1. Because of physical or health problems, do you have difficulty doing any of the activities? Exclude any difficulties that you expect to last less than three months.<br>1. Yes<br>2. No |         |               |
| 1) Walking 100 yards                                     |                                               |                                                                                                                                                                                            | Value   | N (%)         |
|                                                          |                                               |                                                                                                                                                                                            | 0       | 50503 (77.03) |
|                                                          |                                               |                                                                                                                                                                                            | 1       | 14782 (22.55) |
|                                                          |                                               |                                                                                                                                                                                            | Missing | 277 (0.42)    |
| 2) Sitting for 2 hours or more                           |                                               |                                                                                                                                                                                            | Value   | N (%)         |
|                                                          |                                               |                                                                                                                                                                                            | 0       | 46098 (70.31) |
|                                                          |                                               |                                                                                                                                                                                            | 1       | 19187 (29.27) |
|                                                          |                                               |                                                                                                                                                                                            | Missing | 277 (0.42)    |
| 3) Getting up from a chair after sitting for long period |                                               |                                                                                                                                                                                            | Value   | N (%)         |
|                                                          |                                               |                                                                                                                                                                                            | 0       | 44358 (67.66) |
|                                                          |                                               |                                                                                                                                                                                            | 1       | 20927 (31.92) |
|                                                          |                                               |                                                                                                                                                                                            | Missing | 277 (0.42)    |
| 4) Climbing one flight of stairs without resting         |                                               |                                                                                                                                                                                            | Value   | N (%)         |
|                                                          |                                               |                                                                                                                                                                                            | 0       | 37857 (57.74) |
|                                                          |                                               |                                                                                                                                                                                            | 1       | 27428 (41.84) |
|                                                          |                                               |                                                                                                                                                                                            | Missing | 277 (0.42)    |
| 5) Stooping, kneeling or crouching                       |                                               |                                                                                                                                                                                            | Value   | N (%)         |
|                                                          |                                               |                                                                                                                                                                                            | 0       | 36375 (55.48) |
|                                                          |                                               |                                                                                                                                                                                            | 1       | 28910 (44.10) |
|                                                          |                                               |                                                                                                                                                                                            | Missing | 277 (0.42)    |
| 6) Reaching or extending arms                            |                                               |                                                                                                                                                                                            | Value   | N (%)         |
|                                                          |                                               |                                                                                                                                                                                            | 0       | 56168 (85.67) |
|                                                          |                                               |                                                                                                                                                                                            | 1       | 9117 (13.91)  |

1  
2  
3  
4  
5  
6  
7  
8  
9  
10  
11  
12  
13  
14  
15  
16  
17  
18  
19  
20  
21  
22  
23  
24  
25  
26  
27  
28  
29  
30  
31  
32  
33  
34  
35  
36  
37  
38  
39  
40  
41  
42  
43  
44  
45  
46

|                                                                            |                    |                                                                                                                                                                                                                                                                                                                                                        |         |               |
|----------------------------------------------------------------------------|--------------------|--------------------------------------------------------------------------------------------------------------------------------------------------------------------------------------------------------------------------------------------------------------------------------------------------------------------------------------------------------|---------|---------------|
| above shoulder level (either arm)                                          |                    |                                                                                                                                                                                                                                                                                                                                                        | Missing | 277 (0.42)    |
| 7) Pulling or pushing large objects                                        |                    |                                                                                                                                                                                                                                                                                                                                                        | Value   | N (%)         |
|                                                                            |                    |                                                                                                                                                                                                                                                                                                                                                        | 0       | 40486 (61.75) |
|                                                                            |                    |                                                                                                                                                                                                                                                                                                                                                        | 1       | 24798 (37.82) |
|                                                                            |                    |                                                                                                                                                                                                                                                                                                                                                        | Missing | 278 (0.42)    |
| 8) Lifting or carrying weights over 5 kilos, like a heavy bag of groceries |                    |                                                                                                                                                                                                                                                                                                                                                        | Value   | N (%)         |
|                                                                            |                    |                                                                                                                                                                                                                                                                                                                                                        | 0       | 48469 (73.93) |
|                                                                            |                    |                                                                                                                                                                                                                                                                                                                                                        | 1       | 16815 (25.65) |
|                                                                            |                    |                                                                                                                                                                                                                                                                                                                                                        | Missing | 278 (0.42)    |
| 9) Picking up a coin from a table                                          |                    |                                                                                                                                                                                                                                                                                                                                                        | Value   | N (%)         |
|                                                                            |                    |                                                                                                                                                                                                                                                                                                                                                        | 0       | 61255 (93.43) |
|                                                                            |                    |                                                                                                                                                                                                                                                                                                                                                        | 1       | 4029 (6.15)   |
|                                                                            |                    |                                                                                                                                                                                                                                                                                                                                                        | Missing | 278 (0.42)    |
| <b>ADL/IADL<sup>†</sup> limitations (13 deficits)</b>                      | 1 = Yes,<br>0 = No | Now, I will ask you about a few everyday activities. Please tell me if you have any difficulty with these because of a physical, mental, emotional, or memory problem. Please exclude any difficulties you expect to last less than three months.<br><br>Because of a health or memory problem, do you have any difficulty with...?<br>1. Yes<br>2. No |         |               |
| 1) Dressing, including putting on chappals, shoes, etc.                    |                    |                                                                                                                                                                                                                                                                                                                                                        | Value   | N (%)         |
|                                                                            |                    |                                                                                                                                                                                                                                                                                                                                                        | 0       | 62376 (95.14) |
|                                                                            |                    |                                                                                                                                                                                                                                                                                                                                                        | 1       | 2905 (4.43)   |
|                                                                            |                    |                                                                                                                                                                                                                                                                                                                                                        | Missing | 281 (0.43)    |
| 2) Walking across a room                                                   |                    |                                                                                                                                                                                                                                                                                                                                                        | Value   | N (%)         |
|                                                                            |                    |                                                                                                                                                                                                                                                                                                                                                        | 0       | 62466 (95.28) |
|                                                                            |                    |                                                                                                                                                                                                                                                                                                                                                        | 1       | 2815 (4.29)   |

|                                                    |  |  |         |               |
|----------------------------------------------------|--|--|---------|---------------|
|                                                    |  |  | Missing | 281 (0.43)    |
| 3) Bathing                                         |  |  | Value   | N (%)         |
|                                                    |  |  | 0       | 62462 (95.27) |
|                                                    |  |  | 1       | 2819 (4.30)   |
|                                                    |  |  | Missing | 281 (0.43)    |
| 4) Eating                                          |  |  | Value   | N (%)         |
|                                                    |  |  | 0       | 62336 (95.08) |
|                                                    |  |  | 1       | 2945 (4.49)   |
|                                                    |  |  | Missing | 281 (0.43)    |
| 5) Getting in or out of bed                        |  |  | Value   | N (%)         |
|                                                    |  |  | 0       | 60712 (92.60) |
|                                                    |  |  | 1       | 4569 (6.97)   |
|                                                    |  |  | Missing | 281 (0.43)    |
| 6) Using the toilet, including getting up and down |  |  | Value   | N (%)         |
|                                                    |  |  | 0       | 58531 (89.28) |
|                                                    |  |  | 1       | 6750 (10.30)  |
|                                                    |  |  | Missing | 281 (0.43)    |
| 7) Preparing a hot meal (cooking and serving)      |  |  | Value   | N (%)         |
|                                                    |  |  | 0       | 58627 (89.42) |
|                                                    |  |  | 1       | 6654 (10.15)  |
|                                                    |  |  | Missing | 281 (0.43)    |
| 8) Shopping for groceries                          |  |  | Value   | N (%)         |
|                                                    |  |  | 0       | 56411 (86.04) |
|                                                    |  |  | 1       | 8865 (13.52)  |
|                                                    |  |  | Missing | 286 (0.44)    |
| 9) Making telephone calls                          |  |  | Value   | N (%)         |
|                                                    |  |  | 0       | 53181 (81.12) |
|                                                    |  |  | 1       | 12043 (18.37) |
|                                                    |  |  | Missing | 338 (0.52)    |
| 10) Taking medications                             |  |  | Value   | N (%)         |
|                                                    |  |  | 0       | 59283 (90.42) |
|                                                    |  |  | 1       | 5998 (9.15)   |



1  
2  
3  
4  
5  
6  
7  
8  
9  
10  
11  
12  
13  
14  
15  
16  
17  
18  
19  
20  
21  
22  
23  
24  
25  
26  
27  
28  
29  
30  
31  
32  
33  
34  
35  
36  
37  
38  
39  
40  
41  
42  
43  
44  
45  
46

|                                                                                         |                                                                      |                                                                                                                                                                                                                                                                                                                                                                                                    |         |               |
|-----------------------------------------------------------------------------------------|----------------------------------------------------------------------|----------------------------------------------------------------------------------------------------------------------------------------------------------------------------------------------------------------------------------------------------------------------------------------------------------------------------------------------------------------------------------------------------|---------|---------------|
|                                                                                         |                                                                      |                                                                                                                                                                                                                                                                                                                                                                                                    | Missing | 281 (0.43)    |
| 11) Doing work around the house or garden                                               |                                                                      |                                                                                                                                                                                                                                                                                                                                                                                                    | Value   | N (%)         |
|                                                                                         |                                                                      |                                                                                                                                                                                                                                                                                                                                                                                                    | 0       | 55490 (84.64) |
|                                                                                         |                                                                      |                                                                                                                                                                                                                                                                                                                                                                                                    | 1       | 9791 (14.93)  |
|                                                                                         |                                                                      |                                                                                                                                                                                                                                                                                                                                                                                                    | Missing | 281 (0.43)    |
| 12) Managing money, such as paying bills and keeping track of expenses                  |                                                                      |                                                                                                                                                                                                                                                                                                                                                                                                    | Value   | N (%)         |
|                                                                                         |                                                                      |                                                                                                                                                                                                                                                                                                                                                                                                    | 0       | 54799 (83.58) |
|                                                                                         |                                                                      |                                                                                                                                                                                                                                                                                                                                                                                                    | 1       | 10482 (15.99) |
|                                                                                         |                                                                      |                                                                                                                                                                                                                                                                                                                                                                                                    | Missing | 281 (0.43)    |
| 13) Getting around or finding address in unfamiliar place                               |                                                                      |                                                                                                                                                                                                                                                                                                                                                                                                    | Value   | N (%)         |
|                                                                                         |                                                                      |                                                                                                                                                                                                                                                                                                                                                                                                    | 0       | 53400 (81.45) |
|                                                                                         |                                                                      |                                                                                                                                                                                                                                                                                                                                                                                                    | 1       | 11881 (18.12) |
|                                                                                         |                                                                      |                                                                                                                                                                                                                                                                                                                                                                                                    | Missing | 281 (0.43)    |
| <b>Any form of mental impairment (1) (Proxy variable used for mental health status)</b> | 1 if Yes to 1. & Selected b. in 2.<br>0 otherwise                    | 1. Do you have any form of physical or mental impairment?<br>1. Yes<br>2. No<br><br>2. Which form of impairment do you have?<br>a. Physical impairment such as lower body or upper body<br>b. Mental impairment such as intellectual, cognition, or learning impairment<br>c. Hearing impairment<br>d. Visual impairment<br>e. Speech impairment such as speech production, language comprehension | Value   | N (%)         |
|                                                                                         |                                                                      |                                                                                                                                                                                                                                                                                                                                                                                                    | 0       | 64046 (97.69) |
|                                                                                         |                                                                      |                                                                                                                                                                                                                                                                                                                                                                                                    | 1       | 1222 (1.86)   |
|                                                                                         |                                                                      |                                                                                                                                                                                                                                                                                                                                                                                                    | Missing | 294 (0.45)    |
| <b>Body mass index (BMI) (1 deficit)</b>                                                | BMI >= 18.5 - <25 = 0 (Normal)<br>BMI >= 25 - <30 = 0.5 (Overweight) | BMI is weight in kilograms divided by height in meters squared.                                                                                                                                                                                                                                                                                                                                    | Value   | N (%)         |
|                                                                                         |                                                                      |                                                                                                                                                                                                                                                                                                                                                                                                    | 0       | 30872 (47.09) |
|                                                                                         |                                                                      |                                                                                                                                                                                                                                                                                                                                                                                                    | 0.5     | 12852 (19.60) |
|                                                                                         |                                                                      |                                                                                                                                                                                                                                                                                                                                                                                                    | 1       | 15349 (23.41) |
|                                                                                         |                                                                      |                                                                                                                                                                                                                                                                                                                                                                                                    | Missing | 6489 (9.90)   |

|                                  | BMI < 18.5 = 1<br>(Underweight)<br>BMI >= 30 = 1<br>(Obese)                                                                                                                                                                                                                                                               |                                                                                                                                                                                                                  |                                                                                                                                                                                                                                                    |       |       |   |               |   |               |         |              |  |
|----------------------------------|---------------------------------------------------------------------------------------------------------------------------------------------------------------------------------------------------------------------------------------------------------------------------------------------------------------------------|------------------------------------------------------------------------------------------------------------------------------------------------------------------------------------------------------------------|----------------------------------------------------------------------------------------------------------------------------------------------------------------------------------------------------------------------------------------------------|-------|-------|---|---------------|---|---------------|---------|--------------|--|
| <b>Grip strength (1 deficit)</b> | Grip (in kg), (Left+Right hand)/2<br><br>Men:<br>(0<BMI<=24 and grip<=29)<br>or<br>(24<BMI<=26 and grip <=30) or<br>(26<BMI<=28 and grip<=30)<br>or<br>(28<BMI<=40 and grip<=32)<br>= 1 (Weak grip)<br><br>Women:<br>(0<BMI<=23 and grip<=17)<br>or<br>(23<BMI<=26 and grip <=17.3) or<br>(26<BMI<=29 and grip<=18)<br>or | The LASI measured grip strength in kilograms using a handheld dynamometer (Smedley's Hand Dynamometer). Health investigators collected two readings of grip strength for both hands (dominant and non-dominant). | <table border="1"> <thead> <tr> <th>Value</th> <th>N (%)</th> </tr> </thead> <tbody> <tr> <td>0</td> <td>23368 (35.64)</td> </tr> <tr> <td>1</td> <td>35313 (53.86)</td> </tr> <tr> <td>Missing</td> <td>6881 (10.50)</td> </tr> </tbody> </table> | Value | N (%) | 0 | 23368 (35.64) | 1 | 35313 (53.86) | Missing | 6881 (10.50) |  |
| Value                            | N (%)                                                                                                                                                                                                                                                                                                                     |                                                                                                                                                                                                                  |                                                                                                                                                                                                                                                    |       |       |   |               |   |               |         |              |  |
| 0                                | 23368 (35.64)                                                                                                                                                                                                                                                                                                             |                                                                                                                                                                                                                  |                                                                                                                                                                                                                                                    |       |       |   |               |   |               |         |              |  |
| 1                                | 35313 (53.86)                                                                                                                                                                                                                                                                                                             |                                                                                                                                                                                                                  |                                                                                                                                                                                                                                                    |       |       |   |               |   |               |         |              |  |
| Missing                          | 6881 (10.50)                                                                                                                                                                                                                                                                                                              |                                                                                                                                                                                                                  |                                                                                                                                                                                                                                                    |       |       |   |               |   |               |         |              |  |

1  
2  
3  
4  
5  
6  
7  
8  
9  
10  
11  
12  
13  
14  
15  
16  
17  
18  
19  
20  
21  
22  
23  
24  
25  
26  
27  
28  
29  
30  
31  
32  
33  
34  
35  
36  
37  
38  
39  
40  
41  
42  
43  
44  
45  
46

1  
2  
3  
4  
5  
6  
7  
8  
9  
10  
11  
12  
13  
14  
15  
16  
17  
18  
19  
20  
21  
22  
23  
24  
25  
26  
27  
28  
29  
30  
31  
32  
33  
34  
35  
36  
37  
38  
39  
40  
41  
42  
43  
44  
45  
46

|                                                                                                                                                                       | (29<BMI<=40 and grip<=21) = 1 (Weak grip)<br><br>1 = weak grip if fulfilled above specified conditions, 0 otherwise |                                                                                                                                                   |                                                                                                                                                                                                                                                  |       |       |   |               |   |               |         |              |
|-----------------------------------------------------------------------------------------------------------------------------------------------------------------------|---------------------------------------------------------------------------------------------------------------------|---------------------------------------------------------------------------------------------------------------------------------------------------|--------------------------------------------------------------------------------------------------------------------------------------------------------------------------------------------------------------------------------------------------|-------|-------|---|---------------|---|---------------|---------|--------------|
| <b>Timed walk (gait speed) (1 deficit)</b>                                                                                                                            | Gait speed = 1 if timed walk > 10 (Slow)<br>Gait speed = 0 if timed walk <=10 (Normal)                              | LASI, respondents were asked to walk 4 metres twice. The time taken to walk was recorded in seconds. Each time, and the mean time was calculated. | <table border="1"> <thead> <tr> <th>Value</th> <th>N (%)</th> </tr> </thead> <tbody> <tr> <td>0</td> <td>57032 (86.99)</td> </tr> <tr> <td>1</td> <td>1289 (1.97)</td> </tr> <tr> <td>Missing</td> <td>7241 (11.04)</td> </tr> </tbody> </table> | Value | N (%) | 0 | 57032 (86.99) | 1 | 1289 (1.97)   | Missing | 7241 (11.04) |
| Value                                                                                                                                                                 | N (%)                                                                                                               |                                                                                                                                                   |                                                                                                                                                                                                                                                  |       |       |   |               |   |               |         |              |
| 0                                                                                                                                                                     | 57032 (86.99)                                                                                                       |                                                                                                                                                   |                                                                                                                                                                                                                                                  |       |       |   |               |   |               |         |              |
| 1                                                                                                                                                                     | 1289 (1.97)                                                                                                         |                                                                                                                                                   |                                                                                                                                                                                                                                                  |       |       |   |               |   |               |         |              |
| Missing                                                                                                                                                               | 7241 (11.04)                                                                                                        |                                                                                                                                                   |                                                                                                                                                                                                                                                  |       |       |   |               |   |               |         |              |
| <b>Frailty Index Scoring:</b><br>$\sum(\text{variables})/40$<br><b>Score range: 0 – 1</b><br><b>Cut points:</b><br><b>Robust = 0 to &lt; 0.25, Frail = 0.25 – 1.0</b> |                                                                                                                     |                                                                                                                                                   | <table border="1"> <thead> <tr> <th>Value</th> <th>N (%)</th> </tr> </thead> <tbody> <tr> <td>0</td> <td>42767 (65.23)</td> </tr> <tr> <td>1</td> <td>14882 (22.70)</td> </tr> <tr> <td>Missing</td> <td>7913 (.07)</td> </tr> </tbody> </table> | Value | N (%) | 0 | 42767 (65.23) | 1 | 14882 (22.70) | Missing | 7913 (.07)   |
| Value                                                                                                                                                                 | N (%)                                                                                                               |                                                                                                                                                   |                                                                                                                                                                                                                                                  |       |       |   |               |   |               |         |              |
| 0                                                                                                                                                                     | 42767 (65.23)                                                                                                       |                                                                                                                                                   |                                                                                                                                                                                                                                                  |       |       |   |               |   |               |         |              |
| 1                                                                                                                                                                     | 14882 (22.70)                                                                                                       |                                                                                                                                                   |                                                                                                                                                                                                                                                  |       |       |   |               |   |               |         |              |
| Missing                                                                                                                                                               | 7913 (.07)                                                                                                          |                                                                                                                                                   |                                                                                                                                                                                                                                                  |       |       |   |               |   |               |         |              |

\* Unweighted figures.

† ADL: Activities of Daily Living; IADL: Instrumental Activities of Daily Living

**S2 Table. Definition of outcomes – hospitalization in last 12 months and any fall in past 2 years.**

| Survey questions                                                                                                                                                                                                                                                                                                                                                                                                                                                                                                                                                                                                                                                                                                                                                                                                                                                                                                                                                                                                                                                                                                                                                                                                                                                                                                                                                    | Outcome definition                                                                                                                                                                                                                                                                                                                                                                                                                                                                                                                                                                                         |
|---------------------------------------------------------------------------------------------------------------------------------------------------------------------------------------------------------------------------------------------------------------------------------------------------------------------------------------------------------------------------------------------------------------------------------------------------------------------------------------------------------------------------------------------------------------------------------------------------------------------------------------------------------------------------------------------------------------------------------------------------------------------------------------------------------------------------------------------------------------------------------------------------------------------------------------------------------------------------------------------------------------------------------------------------------------------------------------------------------------------------------------------------------------------------------------------------------------------------------------------------------------------------------------------------------------------------------------------------------------------|------------------------------------------------------------------------------------------------------------------------------------------------------------------------------------------------------------------------------------------------------------------------------------------------------------------------------------------------------------------------------------------------------------------------------------------------------------------------------------------------------------------------------------------------------------------------------------------------------------|
| <p><b>Q1. In the past 12 months, have you visited any health care facility, or any health professional has visited you?</b> <i>[Please identify ALL the facilities that you have visited]</i><br/> <i>[Instruction: If response is 'p' freeze all other options]</i></p> <p><b>Public facility:</b></p> <ul style="list-style-type: none"> <li>a. Health post/sub centers</li> <li>b. Primary health center/Urban Health Center</li> <li>c. Community health center</li> <li>d. District / Sub-district hospital</li> <li>e. Government/tertiary hospital</li> <li>f. Govt. AYUSH hospital</li> </ul> <p><b>Private facility:</b></p> <ul style="list-style-type: none"> <li>g. Private hospital/nursing home</li> <li>h. Private clinic (OPD based services)</li> <li>i. NGO/Charity/Trust/Church-run hospital</li> <li>j. Private AYUSH hospital</li> </ul> <p><b>Others:</b></p> <ul style="list-style-type: none"> <li>k. Health camp</li> <li>l. Mobile healthcare unit</li> <li>m. Pharmacy/drugstore</li> <li>n. Home visit</li> <li>o. Other, please specify _____</li> <li>p. None</li> </ul> <p><b>Q2. Over the last 12 months, how many times you were admitted as patient to a hospital/long-term care facility for at least one night?</b> <i>[Instruction for the interviewer: If respondent did not stay at hospital, enter '0']</i> _____ Times</p> | <p><b>Number of hospitalizations in past 12 months</b> was defined as response to Q2. Respondents who said 'None' to Q1 were also coded as '0'.</p> <p>The variable <b>ever hospitalised in past 12 months</b> was coded as 'yes' if the number of hospitalizations was 1 or more and 'no' if 0.</p> <p>Respondents with a non-zero response to Q2 were then asked Q3. The maximum of the responses to the two questions, Q2 and Q3, was used to construct the count variable <b>number of nights in hospital in past 12 months</b>. In addition, respondents who said 'None' to Q1 were coded as '0'.</p> |

1  
2  
3  
4  
5  
6  
7  
8  
9  
10  
11  
12  
13  
14  
15  
16  
17  
18  
19  
20  
21  
22  
23  
24  
25  
26  
27  
28  
29  
30  
31  
32  
33  
34  
35  
36  
37  
38  
39  
40  
41  
42  
43  
44  
45  
46

**Q3. [Ask only if Q2 ≥ 1] How many nights have you spent in the hospital during the past 12 months?** Number of nights \_\_\_\_\_

**Q1. In the past two years, have you sustained any major injury?**

- 1. Yes
- 2. No

**Q2. [Ask only if Q1=1] What was the cause of that injury? [Multiple answers are allowed]**

- a. Traffic accident
- b. Struck by person or object
- c. Fire, flames, burn, electric Shock
- d. Drowning
- e. Poisoning
- f. Animal attack or bite
- g. Fall
- h. Other, please specify\_\_\_\_\_

**Q3. [Ask only if Q2≠ g] In the past two years, have you fallen down?**

- 1. Yes
- 2. No

Individuals having **any fall in last 2 years** were identified as those who responded 'Yes' to Q1 and identified 'Fall' in response to Q2, or those who said 'Yes' to Q3.

**S3 Table. Construction of cognition score and distribution of its components.**

| Domain             | Item                  | Measurement                                                                                                          | Questions                                                                                                                            | Range | Distribution in 45-plus participants (n=65,562) |              |
|--------------------|-----------------------|----------------------------------------------------------------------------------------------------------------------|--------------------------------------------------------------------------------------------------------------------------------------|-------|-------------------------------------------------|--------------|
| <b>Memory</b>      | Immediate word recall | Interviewer read out a list of 10 words and respondents were asked to repeat the words.                              | I will read a set of 10 words and ask you to recall as many as you can.<br>1. Number of words respondent (R) correctly recalls _____ | 0-10  | 0                                               | 538 (0.8)    |
|                    |                       |                                                                                                                      |                                                                                                                                      |       | 1                                               | 1057 (1.7)   |
|                    |                       |                                                                                                                      |                                                                                                                                      |       | 2                                               | 3159 (4.9)   |
|                    |                       |                                                                                                                      |                                                                                                                                      |       | 3                                               | 6899 (10.8)  |
|                    |                       |                                                                                                                      |                                                                                                                                      |       | 4                                               | 11872 (18.6) |
|                    |                       |                                                                                                                      |                                                                                                                                      |       | 5                                               | 14183 (22.2) |
|                    |                       |                                                                                                                      |                                                                                                                                      |       | 6                                               | 12298 (19.2) |
|                    |                       |                                                                                                                      |                                                                                                                                      |       | 7                                               | 8243 (12.9)  |
|                    |                       |                                                                                                                      |                                                                                                                                      |       | 8                                               | 3884 (6.1)   |
|                    |                       |                                                                                                                      |                                                                                                                                      |       | 9                                               | 1238 (1.9)   |
|                    |                       |                                                                                                                      |                                                                                                                                      |       | 10                                              | 595 (0.9)    |
|                    |                       |                                                                                                                      |                                                                                                                                      |       | Missing                                         | 1596         |
|                    | Delayed word recall   | Respondents were asked to recall the same words read out for immediate recall after some time.                       | 1. Number of words respondent (R) correctly recalls _____                                                                            | 0-10  | 1                                               | 4399 (7.3)   |
|                    |                       |                                                                                                                      |                                                                                                                                      |       | 2                                               | 8068 (13.5)  |
|                    |                       |                                                                                                                      |                                                                                                                                      |       | 3                                               | 12022 (20)   |
|                    |                       |                                                                                                                      |                                                                                                                                      |       | 4                                               | 12800 (21.3) |
|                    |                       |                                                                                                                      |                                                                                                                                      |       | 5                                               | 9970 (16.6)  |
|                    |                       |                                                                                                                      |                                                                                                                                      |       | 6                                               | 6505 (10.8)  |
|                    |                       |                                                                                                                      |                                                                                                                                      |       | 7                                               | 3541 (5.9)   |
|                    |                       |                                                                                                                      |                                                                                                                                      |       | 8                                               | 1662 (2.8)   |
|                    |                       |                                                                                                                      |                                                                                                                                      |       | 9                                               | 609 (1)      |
|                    |                       |                                                                                                                      |                                                                                                                                      |       | 10                                              | 393 (0.7)    |
|                    |                       |                                                                                                                      |                                                                                                                                      |       | Missing                                         | 5593         |
| <b>Orientation</b> | Time                  | Respondents were asked to state today's date, month and year and day of the week. For each question, the score was 0 | Date<br>1. Correct<br>2. Incorrect<br>Month                                                                                          | 0-4   | 0                                               | 1345 (2.1)   |
|                    |                       |                                                                                                                      |                                                                                                                                      |       | 1                                               | 7306 (11.4)  |
|                    |                       |                                                                                                                      |                                                                                                                                      |       | 2                                               | 10485 (16.4) |

1  
2  
3  
4  
5  
6  
7  
8  
9  
10  
11  
12  
13  
14  
15  
16  
17  
18  
19  
20  
21  
22  
23  
24  
25  
26  
27  
28  
29  
30  
31  
32  
33  
34  
35  
36  
37  
38  
39  
40  
41  
42  
43  
44  
45  
46

|                            |                   |                                                                                                                                                                                                                                                        |                                                                                                                                                                                                                                                                                                                                                                                                       |     |                                                                                                                                                                                                                                                                        |   |              |   |              |         |              |         |             |   |              |         |      |
|----------------------------|-------------------|--------------------------------------------------------------------------------------------------------------------------------------------------------------------------------------------------------------------------------------------------------|-------------------------------------------------------------------------------------------------------------------------------------------------------------------------------------------------------------------------------------------------------------------------------------------------------------------------------------------------------------------------------------------------------|-----|------------------------------------------------------------------------------------------------------------------------------------------------------------------------------------------------------------------------------------------------------------------------|---|--------------|---|--------------|---------|--------------|---------|-------------|---|--------------|---------|------|
|                            |                   | (incorrect responses) or 1 (correct responses).                                                                                                                                                                                                        | 1. Correct<br>2. Incorrect<br>Year<br>1. Correct<br>2. Incorrect<br>Please tell me which day of week is today. Is it Monday, Tuesday, Wednesday, Thursday, Friday, Saturday, or Sunday?<br>1. Correct<br>2. Incorrect                                                                                                                                                                                 |     | <table border="1"> <tr><td>3</td><td>10599 (16.6)</td></tr> <tr><td>4</td><td>34209 (53.5)</td></tr> <tr><td>Missing</td><td>1618</td></tr> </table>                                                                                                                   | 3 | 10599 (16.6) | 4 | 34209 (53.5) | Missing | 1618         |         |             |   |              |         |      |
| 3                          | 10599 (16.6)      |                                                                                                                                                                                                                                                        |                                                                                                                                                                                                                                                                                                                                                                                                       |     |                                                                                                                                                                                                                                                                        |   |              |   |              |         |              |         |             |   |              |         |      |
| 4                          | 34209 (53.5)      |                                                                                                                                                                                                                                                        |                                                                                                                                                                                                                                                                                                                                                                                                       |     |                                                                                                                                                                                                                                                                        |   |              |   |              |         |              |         |             |   |              |         |      |
| Missing                    | 1618              |                                                                                                                                                                                                                                                        |                                                                                                                                                                                                                                                                                                                                                                                                       |     |                                                                                                                                                                                                                                                                        |   |              |   |              |         |              |         |             |   |              |         |      |
|                            | Place             | Orientation towards place was captured based on place of interview, name of the village, street number/colony name/landmark/neighbourhood and name of the district. For each question, the score was 0 (incorrect responses) or 1 (correct responses). | What is this place used for? [plausible answers are specific answers such as living room, house, apartment, hospital, market, etc.]<br>1. Correct<br>2. Incorrect<br>What is your address? Name of village/town/city<br>1. Correct<br>2. Incorrect<br>Street number/ colony name/landmark/neighbourhood<br>1. Correct<br>2. Incorrect<br>What is name of your district?<br>1. Correct<br>2. Incorrect | 0-4 | <table border="1"> <tr><td>0</td><td>125 (0.2)</td></tr> <tr><td>1</td><td>419 (0.7)</td></tr> <tr><td>2</td><td>1429 (2.2)</td></tr> <tr><td>3</td><td>6775 (10.7)</td></tr> <tr><td>4</td><td>54818 (86.2)</td></tr> <tr><td>Missing</td><td>1996</td></tr> </table> | 0 | 125 (0.2)    | 1 | 419 (0.7)    | 2       | 1429 (2.2)   | 3       | 6775 (10.7) | 4 | 54818 (86.2) | Missing | 1996 |
| 0                          | 125 (0.2)         |                                                                                                                                                                                                                                                        |                                                                                                                                                                                                                                                                                                                                                                                                       |     |                                                                                                                                                                                                                                                                        |   |              |   |              |         |              |         |             |   |              |         |      |
| 1                          | 419 (0.7)         |                                                                                                                                                                                                                                                        |                                                                                                                                                                                                                                                                                                                                                                                                       |     |                                                                                                                                                                                                                                                                        |   |              |   |              |         |              |         |             |   |              |         |      |
| 2                          | 1429 (2.2)        |                                                                                                                                                                                                                                                        |                                                                                                                                                                                                                                                                                                                                                                                                       |     |                                                                                                                                                                                                                                                                        |   |              |   |              |         |              |         |             |   |              |         |      |
| 3                          | 6775 (10.7)       |                                                                                                                                                                                                                                                        |                                                                                                                                                                                                                                                                                                                                                                                                       |     |                                                                                                                                                                                                                                                                        |   |              |   |              |         |              |         |             |   |              |         |      |
| 4                          | 54818 (86.2)      |                                                                                                                                                                                                                                                        |                                                                                                                                                                                                                                                                                                                                                                                                       |     |                                                                                                                                                                                                                                                                        |   |              |   |              |         |              |         |             |   |              |         |      |
| Missing                    | 1996              |                                                                                                                                                                                                                                                        |                                                                                                                                                                                                                                                                                                                                                                                                       |     |                                                                                                                                                                                                                                                                        |   |              |   |              |         |              |         |             |   |              |         |      |
| <b>Arithmetic function</b> | Backward counting | Respondents were asked to count backward as quickly as possible from the number 20. The respondents were asked to stop after correctly counting backward from 20 to 11 or from 19 to 10. Correct counting                                              | Please try to count backward as quickly as you can from the number, I will give you. I will tell you when to stop. Please start with 20.<br>1. R correctly counted (e.g., 19 – 10; 20 – 11) without error<br>2. R made an error(s)                                                                                                                                                                    | 0-2 | <table border="1"> <tr><td>0</td><td>19815 (31)</td></tr> <tr><td>1</td><td>12274 (19.2)</td></tr> <tr><td>2</td><td>31867 (49.8)</td></tr> <tr><td>Missing</td><td>1606</td></tr> </table>                                                                            | 0 | 19815 (31)   | 1 | 12274 (19.2) | 2       | 31867 (49.8) | Missing | 1606        |   |              |         |      |
| 0                          | 19815 (31)        |                                                                                                                                                                                                                                                        |                                                                                                                                                                                                                                                                                                                                                                                                       |     |                                                                                                                                                                                                                                                                        |   |              |   |              |         |              |         |             |   |              |         |      |
| 1                          | 12274 (19.2)      |                                                                                                                                                                                                                                                        |                                                                                                                                                                                                                                                                                                                                                                                                       |     |                                                                                                                                                                                                                                                                        |   |              |   |              |         |              |         |             |   |              |         |      |
| 2                          | 31867 (49.8)      |                                                                                                                                                                                                                                                        |                                                                                                                                                                                                                                                                                                                                                                                                       |     |                                                                                                                                                                                                                                                                        |   |              |   |              |         |              |         |             |   |              |         |      |
| Missing                    | 1606              |                                                                                                                                                                                                                                                        |                                                                                                                                                                                                                                                                                                                                                                                                       |     |                                                                                                                                                                                                                                                                        |   |              |   |              |         |              |         |             |   |              |         |      |

|         |              |                                                                                                                                                                                                                      |                                                                                                                                                                                                                                                                                                                                                                                                                                                                                                                                                         |     |                                                                                                                                                                                                                                                                                                                   |   |              |   |             |   |              |         |             |   |            |   |              |         |      |
|---------|--------------|----------------------------------------------------------------------------------------------------------------------------------------------------------------------------------------------------------------------|---------------------------------------------------------------------------------------------------------------------------------------------------------------------------------------------------------------------------------------------------------------------------------------------------------------------------------------------------------------------------------------------------------------------------------------------------------------------------------------------------------------------------------------------------------|-----|-------------------------------------------------------------------------------------------------------------------------------------------------------------------------------------------------------------------------------------------------------------------------------------------------------------------|---|--------------|---|-------------|---|--------------|---------|-------------|---|------------|---|--------------|---------|------|
|         |              | received 2 points; counts with a mistake received 1 point. Those who could not count received 0 points.                                                                                                              | 3. R cannot count                                                                                                                                                                                                                                                                                                                                                                                                                                                                                                                                       |     |                                                                                                                                                                                                                                                                                                                   |   |              |   |             |   |              |         |             |   |            |   |              |         |      |
|         | Serial       | Respondents were asked to subtract seven from 100 in the first step and asked to continue subtracting seven from the previous number in each subsequent step for five times. Each correct response received 1 point. | <p>Now let's try some subtraction of numbers. One hundred minus 7 equals what?<br/>Enter the answer R gave:<br/>1. _____<br/>2. R cannot count, skip next questions, and go to 'computation'<br/>And 7 from that equals what?<br/>[Interviewer: enter the answer R gave]</p> <p>_____<br/>And 7 from that equals what?<br/>[Interviewer: enter the answer R gave]</p> <p>_____<br/>And 7 from that equals what?<br/>[Interviewer: enter the answer R gave]</p> <p>_____<br/>And 7 from that equals what?<br/>[Interviewer: enter the answer R gave]</p> | 0-5 | <table border="1"> <tr><td>0</td><td>21325 (36.5)</td></tr> <tr><td>1</td><td>5131 (8.8)</td></tr> <tr><td>2</td><td>5791 (9.9)</td></tr> <tr><td>3</td><td>7776 (13.3)</td></tr> <tr><td>4</td><td>5778 (9.9)</td></tr> <tr><td>5</td><td>12599 (21.6)</td></tr> <tr><td>Missing</td><td>7162</td></tr> </table> | 0 | 21325 (36.5) | 1 | 5131 (8.8)  | 2 | 5791 (9.9)   | 3       | 7776 (13.3) | 4 | 5778 (9.9) | 5 | 12599 (21.6) | Missing | 7162 |
| 0       | 21325 (36.5) |                                                                                                                                                                                                                      |                                                                                                                                                                                                                                                                                                                                                                                                                                                                                                                                                         |     |                                                                                                                                                                                                                                                                                                                   |   |              |   |             |   |              |         |             |   |            |   |              |         |      |
| 1       | 5131 (8.8)   |                                                                                                                                                                                                                      |                                                                                                                                                                                                                                                                                                                                                                                                                                                                                                                                                         |     |                                                                                                                                                                                                                                                                                                                   |   |              |   |             |   |              |         |             |   |            |   |              |         |      |
| 2       | 5791 (9.9)   |                                                                                                                                                                                                                      |                                                                                                                                                                                                                                                                                                                                                                                                                                                                                                                                                         |     |                                                                                                                                                                                                                                                                                                                   |   |              |   |             |   |              |         |             |   |            |   |              |         |      |
| 3       | 7776 (13.3)  |                                                                                                                                                                                                                      |                                                                                                                                                                                                                                                                                                                                                                                                                                                                                                                                                         |     |                                                                                                                                                                                                                                                                                                                   |   |              |   |             |   |              |         |             |   |            |   |              |         |      |
| 4       | 5778 (9.9)   |                                                                                                                                                                                                                      |                                                                                                                                                                                                                                                                                                                                                                                                                                                                                                                                                         |     |                                                                                                                                                                                                                                                                                                                   |   |              |   |             |   |              |         |             |   |            |   |              |         |      |
| 5       | 12599 (21.6) |                                                                                                                                                                                                                      |                                                                                                                                                                                                                                                                                                                                                                                                                                                                                                                                                         |     |                                                                                                                                                                                                                                                                                                                   |   |              |   |             |   |              |         |             |   |            |   |              |         |      |
| Missing | 7162         |                                                                                                                                                                                                                      |                                                                                                                                                                                                                                                                                                                                                                                                                                                                                                                                                         |     |                                                                                                                                                                                                                                                                                                                   |   |              |   |             |   |              |         |             |   |            |   |              |         |      |
|         | Computation  | This test involved the mathematical operation of division. Respondents were asked to compute the net sale price of a product after considering a discount sale of half of the original price.                        | <p>A shop is having a sale and selling all items at half price. Before the sale, a sari cost 300 Rs. How much will it cost in the sale?<br/>1. R gave the correct answer of 150 Rs<br/>2. R gave incorrect answer</p> <p>If 5 people all have the winning numbers in the lottery and the prize is 1,000 Rs, how much will each of them get?<br/>1. R gave the correct answer of 200 Rs<br/>2. R gave incorrect answer</p>                                                                                                                               | 0-2 | <table border="1"> <tr><td>0</td><td>5758 (9.3)</td></tr> <tr><td>1</td><td>9856 (15.9)</td></tr> <tr><td>2</td><td>46414 (74.8)</td></tr> <tr><td>Missing</td><td>3534</td></tr> </table>                                                                                                                        | 0 | 5758 (9.3)   | 1 | 9856 (15.9) | 2 | 46414 (74.8) | Missing | 3534        |   |            |   |              |         |      |
| 0       | 5758 (9.3)   |                                                                                                                                                                                                                      |                                                                                                                                                                                                                                                                                                                                                                                                                                                                                                                                                         |     |                                                                                                                                                                                                                                                                                                                   |   |              |   |             |   |              |         |             |   |            |   |              |         |      |
| 1       | 9856 (15.9)  |                                                                                                                                                                                                                      |                                                                                                                                                                                                                                                                                                                                                                                                                                                                                                                                                         |     |                                                                                                                                                                                                                                                                                                                   |   |              |   |             |   |              |         |             |   |            |   |              |         |      |
| 2       | 46414 (74.8) |                                                                                                                                                                                                                      |                                                                                                                                                                                                                                                                                                                                                                                                                                                                                                                                                         |     |                                                                                                                                                                                                                                                                                                                   |   |              |   |             |   |              |         |             |   |            |   |              |         |      |
| Missing | 3534         |                                                                                                                                                                                                                      |                                                                                                                                                                                                                                                                                                                                                                                                                                                                                                                                                         |     |                                                                                                                                                                                                                                                                                                                   |   |              |   |             |   |              |         |             |   |            |   |              |         |      |



|                           |                           |                                                                                                                                                                                                                                                         |                                                                                                                                                                                                                                                                                                                                                                                                                                                         |     |                                                                                                                                                                                                                                                   |   |              |   |              |         |              |         |              |         |      |  |
|---------------------------|---------------------------|---------------------------------------------------------------------------------------------------------------------------------------------------------------------------------------------------------------------------------------------------------|---------------------------------------------------------------------------------------------------------------------------------------------------------------------------------------------------------------------------------------------------------------------------------------------------------------------------------------------------------------------------------------------------------------------------------------------------------|-----|---------------------------------------------------------------------------------------------------------------------------------------------------------------------------------------------------------------------------------------------------|---|--------------|---|--------------|---------|--------------|---------|--------------|---------|------|--|
| <b>Executive function</b> | Executive (paper folding) | This is a three-stage command task. The respondents were instructed to take a piece of paper from the interviewer, turn it over, fold it in half, and give it back to the interviewer. Three points were given if each task was completed successfully. | When I give you a piece of paper, please turn it over, fold it in half, and give it back to me.<br>1. One of the tasks – turning/folding/returning actions is completed successfully<br>2. Two of the tasks – turning/folding/returning actions are completed successfully<br>3. All of the tasks – turning/folding/returning actions are completed successfully<br>4. None of the tasks – turning/folding/returning actions is completed successfully. | 0-3 | <table border="1"> <tbody> <tr><td>0</td><td>3197 (5)</td></tr> <tr><td>1</td><td>12511 (19.5)</td></tr> <tr><td>2</td><td>25640 (40)</td></tr> <tr><td>3</td><td>22757 (35.5)</td></tr> <tr><td>Missing</td><td>1457</td></tr> </tbody> </table> | 0 | 3197 (5)     | 1 | 12511 (19.5) | 2       | 25640 (40)   | 3       | 22757 (35.5) | Missing | 1457 |  |
| 0                         | 3197 (5)                  |                                                                                                                                                                                                                                                         |                                                                                                                                                                                                                                                                                                                                                                                                                                                         |     |                                                                                                                                                                                                                                                   |   |              |   |              |         |              |         |              |         |      |  |
| 1                         | 12511 (19.5)              |                                                                                                                                                                                                                                                         |                                                                                                                                                                                                                                                                                                                                                                                                                                                         |     |                                                                                                                                                                                                                                                   |   |              |   |              |         |              |         |              |         |      |  |
| 2                         | 25640 (40)                |                                                                                                                                                                                                                                                         |                                                                                                                                                                                                                                                                                                                                                                                                                                                         |     |                                                                                                                                                                                                                                                   |   |              |   |              |         |              |         |              |         |      |  |
| 3                         | 22757 (35.5)              |                                                                                                                                                                                                                                                         |                                                                                                                                                                                                                                                                                                                                                                                                                                                         |     |                                                                                                                                                                                                                                                   |   |              |   |              |         |              |         |              |         |      |  |
| Missing                   | 1457                      |                                                                                                                                                                                                                                                         |                                                                                                                                                                                                                                                                                                                                                                                                                                                         |     |                                                                                                                                                                                                                                                   |   |              |   |              |         |              |         |              |         |      |  |
|                           | Pentagon drawing          | Visio-construction is the ability to coordinate fine motor skills with visuospatial abilities, usually by reproducing geometric figures. Respondents were asked to copy two overlapping pentagons and scored 1 point for a correct drawing.             | Do you see this picture? Please draw that picture on this paper. [Show the picture of two pentagons overlapped]<br>1. Drew picture<br>2. Failed to draw picture<br>3. Not applicable.                                                                                                                                                                                                                                                                   | 0-1 | <table border="1"> <tbody> <tr><td>0</td><td>31187 (55.5)</td></tr> <tr><td>1</td><td>25051 (44.5)</td></tr> <tr><td>Missing</td><td>9324</td></tr> </tbody> </table>                                                                             | 0 | 31187 (55.5) | 1 | 25051 (44.5) | Missing | 9324         |         |              |         |      |  |
| 0                         | 31187 (55.5)              |                                                                                                                                                                                                                                                         |                                                                                                                                                                                                                                                                                                                                                                                                                                                         |     |                                                                                                                                                                                                                                                   |   |              |   |              |         |              |         |              |         |      |  |
| 1                         | 25051 (44.5)              |                                                                                                                                                                                                                                                         |                                                                                                                                                                                                                                                                                                                                                                                                                                                         |     |                                                                                                                                                                                                                                                   |   |              |   |              |         |              |         |              |         |      |  |
| Missing                   | 9324                      |                                                                                                                                                                                                                                                         |                                                                                                                                                                                                                                                                                                                                                                                                                                                         |     |                                                                                                                                                                                                                                                   |   |              |   |              |         |              |         |              |         |      |  |
| <b>Object naming</b>      |                           | The interviewer points to a specific object and asks the respondent to name it. Two objects were pointed out and 1 point was given for each correct response.                                                                                           | What is this? [Items can be anything from cell phones, gloves, hats, rings, and umbrella that can be within close reach.]<br>1. Correct<br>2. Incorrect<br>What is this?<br>1. Correct<br>2. Incorrect                                                                                                                                                                                                                                                  | 0-2 | <table border="1"> <tbody> <tr><td>0</td><td>646 (1)</td></tr> <tr><td>1</td><td>2509 (3.9)</td></tr> <tr><td>2</td><td>61158 (95.1)</td></tr> <tr><td>Missing</td><td>1249</td></tr> </tbody> </table>                                           | 0 | 646 (1)      | 1 | 2509 (3.9)   | 2       | 61158 (95.1) | Missing | 1249         |         |      |  |
| 0                         | 646 (1)                   |                                                                                                                                                                                                                                                         |                                                                                                                                                                                                                                                                                                                                                                                                                                                         |     |                                                                                                                                                                                                                                                   |   |              |   |              |         |              |         |              |         |      |  |
| 1                         | 2509 (3.9)                |                                                                                                                                                                                                                                                         |                                                                                                                                                                                                                                                                                                                                                                                                                                                         |     |                                                                                                                                                                                                                                                   |   |              |   |              |         |              |         |              |         |      |  |
| 2                         | 61158 (95.1)              |                                                                                                                                                                                                                                                         |                                                                                                                                                                                                                                                                                                                                                                                                                                                         |     |                                                                                                                                                                                                                                                   |   |              |   |              |         |              |         |              |         |      |  |
| Missing                   | 1249                      |                                                                                                                                                                                                                                                         |                                                                                                                                                                                                                                                                                                                                                                                                                                                         |     |                                                                                                                                                                                                                                                   |   |              |   |              |         |              |         |              |         |      |  |

Composite cognition score is the combined score of memory, orientation, arithmetic function, executive function, and object naming and is obtained by summing up the responses for all these items. It ranges from 0-43.

**S4 Table. Characteristics of excluded participants and participants included in various analyses.**

| Characteristic                              | 45-plus adults with frailty status missing | Study participants (45-plus adults with frailty status non-missing) | Study participants with non-missing hospitalization status | Study participants with non-missing fall status | Study participants with non-missing cognition score |
|---------------------------------------------|--------------------------------------------|---------------------------------------------------------------------|------------------------------------------------------------|-------------------------------------------------|-----------------------------------------------------|
|                                             | N = 7,913                                  | N = 57,649                                                          | N = 56,790                                                 | N = 57,642                                      | N = 42,015                                          |
| <b>Sex</b>                                  |                                            |                                                                     |                                                            |                                                 |                                                     |
| Female                                      | 4,209 (53%)                                | 30,874 (54%)                                                        | 30,422 (54%)                                               | 30,871 (54%)                                    | 20,767 (49%)                                        |
| Male                                        | 3,704 (47%)                                | 26,775 (46%)                                                        | 26,368 (46%)                                               | 26,771 (46%)                                    | 21,248 (51%)                                        |
| <b>Age, Median (Q1 – Q3)*</b>               | 61 (52, 70)                                | 58 (50, 66)                                                         | 58 (50, 66)                                                | 58 (50, 66)                                     | 57 (50, 65)                                         |
| <b>Place of residence</b>                   |                                            |                                                                     |                                                            |                                                 |                                                     |
| Rural                                       | 4,619 (58%)                                | 37,805 (66%)                                                        | 37,202 (66%)                                               | 37,799 (66%)                                    | 26,212 (62%)                                        |
| Urban                                       | 3,294 (42%)                                | 19,844 (34%)                                                        | 19,588 (34%)                                               | 19,843 (34%)                                    | 15,803 (38%)                                        |
| <b>Educational status</b>                   |                                            |                                                                     |                                                            |                                                 |                                                     |
| No schooling                                | 3,857 (49%)                                | 26,961 (47%)                                                        | 26,488 (47%)                                               | 26,958 (47%)                                    | 16,083 (38%)                                        |
| Less than 5 years                           | 740 (9.4%)                                 | 6,738 (12%)                                                         | 6,653 (12%)                                                | 6,736 (12%)                                     | 4,952 (12%)                                         |
| 5 to 9 years                                | 1,579 (20%)                                | 13,280 (23%)                                                        | 13,125 (23%)                                               | 13,279 (23%)                                    | 11,155 (27%)                                        |
| 10 years or more                            | 1,734 (22%)                                | 10,670 (19%)                                                        | 10,524 (19%)                                               | 10,669 (19%)                                    | 9,825 (23%)                                         |
| Missing                                     | 3                                          |                                                                     |                                                            |                                                 |                                                     |
| <b>MPCE quintile†</b>                       |                                            |                                                                     |                                                            |                                                 |                                                     |
| Poorest                                     | 1,583 (20%)                                | 11,358 (20%)                                                        | 11,174 (20%)                                               | 11,356 (20%)                                    | 7,923 (19%)                                         |
| Poorer                                      | 1,517 (19%)                                | 11,673 (20%)                                                        | 11,487 (20%)                                               | 11,673 (20%)                                    | 8,336 (20%)                                         |
| Middle                                      | 1,487 (19%)                                | 11,676 (20%)                                                        | 11,500 (20%)                                               | 11,674 (20%)                                    | 8,405 (20%)                                         |
| Richer                                      | 1,577 (20%)                                | 11,633 (20%)                                                        | 11,451 (20%)                                               | 11,631 (20%)                                    | 8,727 (21%)                                         |
| Richest                                     | 1,749 (22%)                                | 11,309 (20%)                                                        | 11,178 (20%)                                               | 11,308 (20%)                                    | 8,624 (21%)                                         |
| <b>Living arrangement</b>                   |                                            |                                                                     |                                                            |                                                 |                                                     |
| Living alone                                | 279 (3.5%)                                 | 2,034 (3.5%)                                                        | 2,008 (3.5%)                                               | 2,034 (3.5%)                                    | 1,302 (3.1%)                                        |
| Living with spouse with or without children | 5,270 (67%)                                | 42,607 (74%)                                                        | 41,988 (74%)                                               | 42,604 (74%)                                    | 32,345 (77%)                                        |

|                                                               |             |              |              |              |              |
|---------------------------------------------------------------|-------------|--------------|--------------|--------------|--------------|
| <i>Living with children and others</i>                        | 1,732 (22%) | 10,709 (19%) | 10,527 (19%) | 10,706 (19%) | 6,786 (16%)  |
| <i>Living with others only</i>                                | 632 (8.0%)  | 2,299 (4.0%) | 2,267 (4.0%) | 2,298 (4.0%) | 1,582 (3.8%) |
| <b>Employment</b>                                             |             |              |              |              |              |
| <i>Currently working<sup>§</sup></i>                          | 3,340 (42%) | 28,939 (50%) | 28,526 (50%) | 28,935 (50%) | 22,168 (53%) |
| <i>Worked in the past</i>                                     | 2,236 (28%) | 13,045 (23%) | 12,819 (23%) | 13,043 (23%) | 9,069 (22%)  |
| <i>Never worked</i>                                           | 2,327 (29%) | 15,665 (27%) | 15,445 (27%) | 15,664 (27%) | 10,778 (26%) |
| Missing                                                       | 10          |              |              |              |              |
| <b>Food constraint<sup>¶</sup></b>                            |             |              |              |              |              |
| <i>No</i>                                                     | 7,360 (93%) | 53,801 (93%) | 53,018 (93%) | 53,797 (93%) | 39,582 (94%) |
| <i>Yes</i>                                                    | 553 (7.0%)  | 3,848 (6.7%) | 3,772 (6.6%) | 3,845 (6.7%) | 2,433 (5.8%) |
| <b>Tobacco use</b>                                            |             |              |              |              |              |
| <i>Never used tobacco</i>                                     | 4,894 (66%) | 36,252 (63%) | 35,747 (63%) | 36,249 (63%) | 26,313 (63%) |
| <i>Current/past user</i>                                      | 2,469 (34%) | 21,373 (37%) | 21,023 (37%) | 21,369 (37%) | 15,681 (37%) |
| Missing                                                       | 550         | 24           | 20           | 24           | 21           |
| <b>Alcohol</b>                                                |             |              |              |              |              |
| <i>Never consumed</i>                                         | 6,072 (82%) | 47,218 (82%) | 46,516 (82%) | 47,216 (82%) | 34,223 (81%) |
| <i>Less than once a month in past 3 months</i>                | 738 (10%)   | 6,024 (10%)  | 5,914 (10%)  | 6,020 (10%)  | 4,642 (11%)  |
| <i>One to three days per month or more frequently</i>         | 559 (7.6%)  | 4,397 (7.6%) | 4,354 (7.7%) | 4,396 (7.6%) | 3,145 (7.5%) |
| Missing                                                       | 544         | 10           | 6            | 10           | 5            |
| <b>Caste</b>                                                  |             |              |              |              |              |
| <i>Scheduled caste</i>                                        | 1,264 (16%) | 9,695 (17%)  | 9,515 (17%)  | 9,695 (17%)  | 6,854 (16%)  |
| <i>Scheduled tribe</i>                                        | 1,225 (15%) | 10,140 (18%) | 10,041 (18%) | 10,137 (18%) | 6,514 (16%)  |
| <i>Other backward class</i>                                   | 2,816 (36%) | 21,813 (38%) | 21,448 (38%) | 21,810 (38%) | 16,190 (39%) |
| <i>None of the above/No caste or tribe/Don't know/Missing</i> | 2,608 (33%) | 16,001 (28%) | 15,786 (28%) | 16,000 (28%) | 12,457 (30%) |
| <b>Religion</b>                                               |             |              |              |              |              |
| <i>Hindu</i>                                                  | 5,777 (73%) | 42,322 (73%) | 41,579 (73%) | 42,320 (73%) | 31,313 (75%) |
| <i>Muslim</i>                                                 | 997 (13%)   | 6,806 (12%)  | 6,724 (12%)  | 6,805 (12%)  | 4,834 (12%)  |
| <i>Christian</i>                                              | 734 (9.3%)  | 5,802 (10%)  | 5,787 (10%)  | 5,800 (10%)  | 3,831 (9.1%) |
| <i>Other</i>                                                  | 405 (5.1%)  | 2,719 (4.7%) | 2,700 (4.8%) | 2,717 (4.7%) | 2,037 (4.8%) |

| Region           |             |              |              |              |             |
|------------------|-------------|--------------|--------------|--------------|-------------|
| <i>North</i>     | 1,429 (18%) | 10,537 (18%) | 10,222 (18%) | 10,535 (18%) | 8,015 (19%) |
| <i>Central</i>   | 932 (12%)   | 7,975 (14%)  | 7,654 (13%)  | 7,975 (14%)  | 5,940 (14%) |
| <i>East</i>      | 1,137 (14%) | 10,443 (18%) | 10,443 (18%) | 10,441 (18%) | 7,979 (19%) |
| <i>Northeast</i> | 962 (12%)   | 7,551 (13%)  | 7,546 (13%)  | 7,550 (13%)  | 5,191 (12%) |
| <i>West</i>      | 1,314 (17%) | 7,580 (13%)  | 7,449 (13%)  | 7,579 (13%)  | 5,231 (12%) |
| <i>South</i>     | 2,139 (27%) | 13,563 (24%) | 13,476 (24%) | 13,562 (24%) | 9,659 (23%) |

Numbers presented in table are unweighted.

\* Q1: first quartile, Q3: third quartile.

† MPCE: monthly per capita expenditure which is defined as total monthly household consumption expenditure divided by household size. It includes household's per capita spending on food and non-food items including spending on health, education, utilities, etc.

§ Includes Temporarily laid off, on sick or other leave, or in job training

¶ Household food unavailability in the past 12 months, where household members either reduced their meal size, did not eat even though they were hungry, or did not eat for a whole day because enough food was not available in the household.

**S5 Table. Prevalence of frailty, overall and by participants' background characteristics.**

| Characteristic                                 | All               | 45-60 years       | 60-plus years     |
|------------------------------------------------|-------------------|-------------------|-------------------|
| <b>Overall</b>                                 | 29.5 (28.7, 30.4) | 16.2 (15.4, 16.9) | 43.2 (41.9, 44.4) |
| <b>Sex</b>                                     |                   |                   |                   |
| Female                                         | 36.1 (34.9, 37.4) | 21.4 (20.2, 22.6) | 52.2 (50.4, 54.1) |
| Male                                           | 21.7 (20.8, 22.7) | 9.6 (8.5, 10.6)   | 33.2 (31.8, 34.6) |
| <b>5-year age group</b>                        |                   |                   |                   |
| 45-49                                          | 11.6 (10.5, 12.7) | 11.6 (10.5, 12.7) | -                 |
| 50-54                                          | 16.3 (14.8, 17.7) | 16.3 (14.8, 17.7) | -                 |
| 55-59                                          | 21.8 (20.1, 23.5) | 21.8 (20.1, 23.5) | -                 |
| 60-64                                          | 29.9 (28.4, 31.5) | -                 | 29.9 (28.4, 31.5) |
| 65-69                                          | 39 (36.3, 41.7)   | -                 | 39 (36.3, 41.7)   |
| 70-74                                          | 52.5 (49.3, 55.8) | -                 | 52.5 (49.3, 55.8) |
| 75-79                                          | 53.9 (50.4, 57.3) | -                 | 53.9 (50.4, 57.3) |
| 80-plus                                        | 67.9 (64.2, 71.6) | -                 | 67.9 (64.2, 71.6) |
| <b>Place of residence</b>                      |                   |                   |                   |
| Rural                                          | 30.8 (30.1, 31.5) | 17.5 (16.7, 18.3) | 43.7 (42.6, 44.8) |
| Urban                                          | 26.5 (24.3, 28.8) | 13.2 (11.5, 14.9) | 41.8 (38.3, 45.2) |
| <b>Educational status</b>                      |                   |                   |                   |
| No schooling                                   | 35.3 (34.4, 36.3) | 19.8 (18.7, 20.9) | 48 (46.6, 49.4)   |
| Less than 5 years                              | 34.2 (32.1, 36.2) | 19.7 (17.6, 21.8) | 47.6 (44.5, 50.8) |
| 5 to 9 years                                   | 24.7 (22.6, 26.9) | 15.1 (13.4, 16.8) | 37.4 (33.5, 41.3) |
| 10 years or more                               | 15.5 (12.8, 18.2) | 7.9 (6.3, 9.4)    | 27.3 (21.9, 32.7) |
| <b>MPCE fifths</b> <sup>*</sup>                |                   |                   |                   |
| Poorest                                        | 29.8 (28.4, 31.2) | 15 (13.4, 16.6)   | 44.3 (42.1, 46.4) |
| Poorer                                         | 29.9 (28.6, 31.3) | 16.9 (15.3, 18.4) | 42.9 (40.8, 45)   |
| Middle                                         | 28.8 (27.2, 30.4) | 16.1 (14.5, 17.7) | 41.2 (38.8, 43.6) |
| Richer                                         | 30.6 (28.2, 33)   | 17.4 (15.2, 19.6) | 44.1 (40.6, 47.7) |
| Richest                                        | 28.3 (25.7, 30.9) | 15.5 (13.6, 17.3) | 43.4 (39.4, 47.3) |
| <b>Living arrangement</b>                      |                   |                   |                   |
| Living alone                                   | 46.4 (42.8, 50)   | 22.7 (17.9, 27.5) | 53.7 (49.5, 57.9) |
| Living with spouse with or without children    | 24.2 (23.4, 24.9) | 15.5 (14.6, 16.3) | 36.2 (35, 37.5)   |
| Living with children and others                | 45.4 (42.9, 47.9) | 21.4 (19.2, 23.6) | 55.2 (52.3, 58.1) |
| Living with others only                        | 36 (31, 41)       | 13.1 (8.5, 17.8)  | 50.9 (46.7, 55.1) |
| <b>Employment</b>                              |                   |                   |                   |
| Currently working <sup>†</sup>                 | 18.4 (17.6, 19.3) | 12.4 (11.5, 13.3) | 29.3 (27.8, 30.8) |
| Worked in the past                             | 45.9 (44.4, 47.4) | 29.9 (27.3, 32.5) | 50.2 (48.5, 51.9) |
| Never worked                                   | 36.5 (34.2, 38.8) | 20.5 (18.6, 22.3) | 52.9 (49.8, 56)   |
| <b>Food constraint</b> <sup>§</sup>            |                   |                   |                   |
| No                                             | 28.3 (27.4, 29.2) | 15.2 (14.4, 16)   | 41.8 (40.4, 43.1) |
| Yes                                            | 44.1 (41.7, 46.5) | 28.2 (25.2, 31.2) | 58.4 (55, 61.7)   |
| <b>Tobacco use</b>                             |                   |                   |                   |
| Never used tobacco                             | 30.2 (29, 31.4)   | 17.1 (16, 18.2)   | 45 (43.1, 46.8)   |
| Current/past user                              | 28.3 (27.3, 29.3) | 14.4 (13.4, 15.4) | 40.5 (39, 42)     |
| <b>Alcohol use</b>                             |                   |                   |                   |
| Never consumed                                 | 31 (30, 31.9)     | 17.2 (16.3, 18.1) | 44.9 (43.5, 46.3) |
| Less than once a month in past 3 months        | 23.5 (21.8, 25.2) | 11.6 (9.8, 13.3)  | 35.1 (32.2, 37.9) |
| One to three days per month or more frequently | 18.1 (16.2, 19.9) | 9 (7.4, 10.5)     | 29.6 (26, 33.1)   |

|                                                        |                   |                   |                   |
|--------------------------------------------------------|-------------------|-------------------|-------------------|
| <b>Caste</b>                                           |                   |                   |                   |
| Scheduled caste                                        | 29.9 (28.5, 31.4) | 17.9 (16.3, 19.5) | 42.9 (40.6, 45.2) |
| Scheduled tribe                                        | 23.9 (22.1, 25.7) | 12.9 (11.2, 14.6) | 36.6 (33.5, 39.8) |
| Other backward class                                   | 30 (28.4, 31.6)   | 15.5 (14.1, 16.8) | 44.8 (42.5, 47.1) |
| None of the above/No caste or tribe/Don't know/Missing | 30.2 (29.1, 31.3) | 17.2 (16, 18.5)   | 42.5 (40.8, 44.2) |
| <b>Religion</b>                                        |                   |                   |                   |
| Hindu                                                  | 29.1 (28.2, 30.1) | 15.4 (14.6, 16.2) | 43.1 (41.6, 44.5) |
| Muslim                                                 | 34.4 (32.2, 36.6) | 23.4 (20, 26.7)   | 46.1 (43.3, 49)   |
| Christian                                              | 24 (19.5, 28.4)   | 10.5 (6.7, 14.3)  | 39.2 (34.7, 43.7) |
| Other                                                  | 28.2 (25.4, 31.1) | 16.4 (13.1, 19.7) | 39.3 (35, 43.6)   |
| <b>Region</b>                                          |                   |                   |                   |
| North                                                  | 23.6 (22.5, 24.8) | 12 (10.8, 13.2)   | 34.9 (33.1, 36.8) |
| Central                                                | 27.2 (25.7, 28.6) | 14.4 (12.9, 15.8) | 40 (37.7, 42.3)   |
| East                                                   | 33.2 (31.9, 34.5) | 20.5 (19, 22.1)   | 45.7 (43.7, 47.7) |
| Northeast                                              | 19.8 (18.3, 21.2) | 8.8 (7.5, 10.1)   | 34.7 (32.1, 37.3) |
| West                                                   | 32.2 (30.6, 33.8) | 18.6 (16.8, 20.3) | 45 (42.5, 47.6)   |
| South                                                  | 30.6 (27.8, 33.5) | 15.2 (13, 17.5)   | 47.9 (43.9, 51.9) |

Numbers presented in table are weighted, using national-level individual sampling weights provided in data.

\* MPCE: monthly per capita expenditure which is defined as total monthly household consumption expenditure divided by household size. It includes household's per capita spending on food and non-food items including spending on health, education, utilities, etc.

† Includes Temporarily laid off, on sick or other leave, or in job training

§ Household food unavailability in the past 12 months, where household members either reduced their meal size, did not eat even though they were hungry, or did not eat for a whole day because enough food was not available in the household.

**S6 Table. Sex differences in distribution of frailty deficit scores.**

|                                                              | 45-59 years  |              | 60-plus years |              |
|--------------------------------------------------------------|--------------|--------------|---------------|--------------|
|                                                              | Female       | Male         | Female        | Male         |
| <b>Self-reported general Health</b>                          |              |              |               |              |
| 0 (very good)                                                | 851 (4.6%)   | 1,167 (7.6%) | 416 (2.6%)    | 616 (4.2%)   |
| 0.25 (good)                                                  | 7,280 (39%)  | 7,076 (46%)  | 4,418 (28%)   | 4,854 (33%)  |
| 0.5 (fair)                                                   | 8,003 (43%)  | 5,540 (36%)  | 7,160 (45%)   | 6,221 (42%)  |
| 0.75 (poor)                                                  | 2,265 (12%)  | 1,342 (8.8%) | 3,541 (22%)   | 2,663 (18%)  |
| 1 (very poor)                                                | 195 (1.0%)   | 138 (0.9%)   | 485 (3.0%)    | 424 (2.9%)   |
| <b>Self-reported medically diagnosed conditions</b>          |              |              |               |              |
| Arthritis                                                    | 1,568 (8.4%) | 704 (4.6%)   | 1,833 (11%)   | 1,222 (8.1%) |
| Stroke                                                       | 128 (0.7%)   | 225 (1.5%)   | 347 (2.1%)    | 495 (3.3%)   |
| Angina                                                       | 1,313 (7.0%) | 656 (4.3%)   | 1,232 (7.5%)  | 804 (5.3%)   |
| Diabetes                                                     | 1,968 (11%)  | 1,601 (10%)  | 2,416 (15%)   | 2,444 (16%)  |
| COPD                                                         | 116 (0.6%)   | 143 (0.9%)   | 213 (1.3%)    | 252 (1.7%)   |
| Asthma                                                       | 482 (2.6%)   | 414 (2.7%)   | 792 (4.8%)    | 873 (5.8%)   |
| Depression                                                   | 1,278 (6.9%) | 732 (4.8%)   | 1,162 (7.3%)  | 886 (6.0%)   |
| Hypertension                                                 | 7,758 (42%)  | 6,058 (40%)  | 9,524 (58%)   | 7,803 (52%)  |
| Cataract                                                     | 1,027 (5.5%) | 553 (3.6%)   | 3,646 (22%)   | 2,862 (19%)  |
| <b>Medical symptoms</b>                                      |              |              |               |              |
| Bodily aches or pains                                        | 5,300 (28%)  | 2,751 (18%)  | 5,331 (33%)   | 3,660 (24%)  |
| Problem with sleeping                                        | 2,060 (11%)  | 1,369 (8.9%) | 2,449 (15%)   | 1,908 (13%)  |
| Difficulty with distance vision                              |              |              |               |              |
| 0                                                            | 1,255 (6.7%) | 1,559 (10%)  | 542 (3.3%)    | 786 (5.2%)   |
| 0.25                                                         | 8,181 (44%)  | 7,683 (50%)  | 4,716 (29%)   | 5,206 (35%)  |
| 0.5                                                          | 7,340 (39%)  | 5,011 (33%)  | 7,311 (45%)   | 6,329 (42%)  |
| 0.75                                                         | 1,772 (9.5%) | 991 (6.5%)   | 3,318 (20%)   | 2,391 (16%)  |
| 1                                                            | 106 (0.6%)   | 90 (0.6%)    | 444 (2.7%)    | 326 (2.2%)   |
| Difficulty with near vision                                  |              |              |               |              |
| 0                                                            | 922 (4.9%)   | 1,105 (7.2%) | 520 (3.2%)    | 715 (4.8%)   |
| 0.25                                                         | 7,019 (38%)  | 6,310 (41%)  | 4,477 (27%)   | 4,937 (33%)  |
| 0.5                                                          | 7,962 (43%)  | 5,803 (38%)  | 7,646 (47%)   | 6,613 (44%)  |
| 0.75                                                         | 2,580 (14%)  | 1,970 (13%)  | 3,228 (20%)   | 2,420 (16%)  |
| 1                                                            | 156 (0.8%)   | 140 (0.9%)   | 436 (2.7%)    | 340 (2.3%)   |
| <b>Functional assessment (difficulty with the following)</b> |              |              |               |              |
| Walking 100 yards                                            | 3,103 (17%)  | 1,381 (9.0%) | 6,250 (38%)   | 4,048 (27%)  |
| Sitting for 2 hours or more                                  | 4,717 (25%)  | 2,385 (16%)  | 7,270 (45%)   | 4,815 (32%)  |
| Getting up from a chair after sitting for long period        | 5,087 (27%)  | 2,559 (17%)  | 7,894 (48%)   | 5,387 (36%)  |
| Climbing one flight of stairs without resting                | 6,870 (37%)  | 3,350 (22%)  | 10,060 (62%)  | 7,148 (48%)  |

|                                                                         |              |              |              |              |
|-------------------------------------------------------------------------|--------------|--------------|--------------|--------------|
| Stooping, kneeling or crouching                                         | 7,445 (40%)  | 3,838 (25%)  | 10,144 (62%) | 7,483 (50%)  |
| Reaching or extending arms above shoulder level (either arm)            | 1,819 (9.8%) | 964 (6.3%)   | 3,944 (24%)  | 2,390 (16%)  |
| Pulling or pushing large objects                                        | 6,027 (32%)  | 2,717 (18%)  | 9,583 (59%)  | 6,471 (43%)  |
| Lifting or carrying weights over 5 kilos, like a heavy bag of groceries | 3,583 (19%)  | 1,419 (9.3%) | 7,439 (46%)  | 4,374 (29%)  |
| Picking up a coin from a table                                          | 563 (3.0%)   | 296 (1.9%)   | 1,950 (12%)  | 1,220 (8.1%) |
| <b>ADL/IADL* limitations (difficulty with the following)</b>            |              |              |              |              |
| Dressing, including putting on chappals, shoes, etc                     | 440 (2.4%)   | 292 (1.9%)   | 1,282 (7.9%) | 891 (5.9%)   |
| Walking across a room                                                   | 380 (2.0%)   | 208 (1.4%)   | 1,339 (8.2%) | 888 (5.9%)   |
| Bathing                                                                 | 326 (1.7%)   | 249 (1.6%)   | 1,318 (8.1%) | 926 (6.2%)   |
| Eating                                                                  | 390 (2.1%)   | 237 (1.5%)   | 1,394 (8.5%) | 924 (6.2%)   |
| Getting in or out of bed                                                | 864 (4.6%)   | 395 (2.6%)   | 2,024 (12%)  | 1,286 (8.6%) |
| Using the toilet, including getting up and down                         | 1,265 (6.8%) | 630 (4.1%)   | 2,868 (18%)  | 1,987 (13%)  |
| Preparing a hot meal (cooking and serving)                              | 810 (4.3%)   | 669 (4.4%)   | 2,963 (18%)  | 2,212 (15%)  |
| Shopping for groceries                                                  | 1,551 (8.3%) | 630 (4.1%)   | 4,323 (26%)  | 2,361 (16%)  |
| Making telephone calls                                                  | 2,966 (16%)  | 969 (6.3%)   | 5,270 (32%)  | 2,838 (19%)  |
| Taking medications                                                      | 1,194 (6.4%) | 486 (3.2%)   | 2,803 (17%)  | 1,515 (10%)  |
| Doing work around the house or garden                                   | 1,728 (9.3%) | 700 (4.6%)   | 4,598 (28%)  | 2,765 (18%)  |
| Managing money, such as paying bills and keeping track of expenses      | 2,468 (13%)  | 604 (3.9%)   | 5,127 (31%)  | 2,283 (15%)  |
| Getting around or finding address in unfamiliar place                   | 3,041 (16%)  | 726 (4.7%)   | 5,677 (35%)  | 2,437 (16%)  |
| <b>Any form of mental impairment</b>                                    | 266 (1.4%)   | 199 (1.3%)   | 431 (2.6%)   | 326 (2.2%)   |
| <b>Body mass index</b>                                                  |              |              |              |              |
| 0 (normal)                                                              | 8,197 (48%)  | 7,967 (58%)  | 7,118 (49%)  | 7,590 (56%)  |
| 0.5 (underweight/overweight)                                            | 4,531 (26%)  | 3,136 (23%)  | 2,936 (20%)  | 2,249 (17%)  |
| 1 (obese)                                                               | 4,461 (26%)  | 2,731 (20%)  | 4,487 (31%)  | 3,670 (27%)  |
| <b>Weak grip strength</b>                                               | 7,279 (43%)  | 6,807 (49%)  | 10,265 (71%) | 10,962 (82%) |
| <b>Slow gait speed</b>                                                  | 83 (0.5%)    | 48 (0.3%)    | 807 (5.7%)   | 351 (2.6%)   |

\*ADL: Activities of Daily Living; IADL: Instrumental Activities of Daily Living



**S7 Table. Sex-specific associations between frailty and adverse outcomes.**

| Outcome                        | 45-59 years       |                    |                           | 60-plus years     |                    |                           |
|--------------------------------|-------------------|--------------------|---------------------------|-------------------|--------------------|---------------------------|
|                                | Male OR (95% CI)  | Female OR (95% CI) | Female:Male ROR (95% CI)* | Male OR (95% CI)  | Female OR (95% CI) | Female:Male ROR (95% CI)* |
| Hospitalized in last 12 months | 2.22 (1.91, 2.58) | 2.6 (2.11, 3.21)   | 1.17 (0.91, 1.52)         | 2.13 (1.84, 2.46) | 2.27 (1.97, 2.61)  | 1.07 (0.87, 1.31)         |
| Fallen down in last 2 years    | 2.15 (1.96, 2.37) | 2.17 (1.86, 2.54)  | 1.01 (0.84, 1.21)         | 1.75 (1.6, 1.91)  | 2.06 (1.86, 2.29)  | 1.18 (1.03, 1.35)         |
| Poor cognition                 | 1.29 (1.1, 1.5)   | 1.44 (1.00, 2.06)  | 1.12 (0.75, 1.66)         | 1.35 (1.19, 1.52) | 1.56 (1.31, 1.86)  | 1.16 (0.93, 1.44)         |

\*ROR, ratio of odds ratios, indicating the sex difference in the relationship between frailty and adverse outcomes. For example, odds ratios of 2.6 and 2.22 for females and males, respectively, and a female:male ROR of 1.17 for hospitalization indicates that odds of hospitalization are higher for frail adults in both sexes, but the relative increase is 17% higher in females.

**S8 Table. Summary of different frailty measures, by sex and age groups.**

|         | Frailty index        |                      |                      | Frail: frailty index ≥ 0.25 |                      |                      | Frail: frailty index > 0.21 |                      |                      | Frail: Frailty index based on non-missing deficits* ≥ 0.25 |                      |                      |
|---------|----------------------|----------------------|----------------------|-----------------------------|----------------------|----------------------|-----------------------------|----------------------|----------------------|------------------------------------------------------------|----------------------|----------------------|
|         | 45-59 years          | 60-plus years        | Overall              | 45-59 years                 | 60-plus years        | Overall              | 45-59 years                 | 60-plus years        | Overall              | 45-59 years                                                | 60-plus years        | Overall              |
| Overall | 0.14<br>(0.14, 0.15) | 0.24<br>(0.24, 0.25) | 0.19<br>(0.19, 0.2)  | 16.2<br>(15.4, 16.9)        | 43.2<br>(41.9, 44.4) | 29.5<br>(28.7, 30.4) | 22.6<br>(21.7, 23.6)        | 52.2<br>(51, 53.4)   | 37.2<br>(36.4, 38.1) | 16.7<br>(15.7, 17.7)                                       | 44.5<br>(43.3, 45.6) | 30.5<br>(29.7, 31.4) |
| Male    | 0.12<br>(0.12, 0.12) | 0.21<br>(0.21, 0.22) | 0.17<br>(0.16, 0.17) | 9.6 (8.5, 10.6)             | 33.2<br>(31.8, 34.6) | 21.7<br>(20.8, 22.7) | 13.8<br>(12.7, 15)          | 42.2<br>(40.7, 43.6) | 28.4<br>(27.3, 29.4) | 10.8<br>(8.9, 12.6)                                        | 34.8<br>(33.4, 36.1) | 23.1<br>(22, 24.2)   |
| Female  | 0.17<br>(0.16, 0.17) | 0.27<br>(0.27, 0.28) | 0.22<br>(0.21, 0.22) | 21.4<br>(20.2, 22.6)        | 52.2<br>(50.4, 54.1) | 36.1<br>(34.9, 37.4) | 29.6<br>(28.2, 31)          | 61.3<br>(59.6, 63)   | 44.8<br>(43.5, 46.1) | 21.5<br>(20.3, 22.6)                                       | 53.1<br>(51.5, 54.8) | 36.8<br>(35.6, 38)   |

\*Frailty index for an individual was calculated by summing the non-missing health deficit scores and then dividing by the total number of deficits measured in that individual (up to 3 were allowed to be missing). CI: confidence interval

**S9 Table. Association between frailty (alternative definitions) and adverse outcomes.**

| Outcome                           | Frail: frailty index > 0.21   |                                   | Frail: Frailty index based on non-missing deficits* $\geq 0.25$ |                                |
|-----------------------------------|-------------------------------|-----------------------------------|-----------------------------------------------------------------|--------------------------------|
|                                   | 45-59 years<br>OR (95%<br>CI) | $\geq 60$ years<br>OR (95%<br>CI) | 45-59 years<br>OR (95% CI)                                      | $\geq 60$ years<br>OR (95% CI) |
| Hospitalization in last 12 months | 2.26 (2.02, 2.53)             | 2.11 (1.9, 2.33)                  | 2.58 (2.31, 2.88)                                               | 2.37 (2.16, 2.6)               |
| Any fall in last 2 years          | 1.99 (1.85, 2.14)             | 1.88 (1.76, 2.01)                 | 2.18 (2.02, 2.36)                                               | 1.97 (1.85, 2.09)              |
| Poor cognition                    | 1.99 (1.85, 2.14)             | 1.35 (1.22, 1.5)                  | 1.35 (1.19, 1.55)                                               | 1.42 (1.3, 1.56)               |

\*Frailty index for an individual was calculated by summing the non-missing health deficit scores and then dividing by the total number of deficits measured in that individual (up to 3 were allowed to be missing).

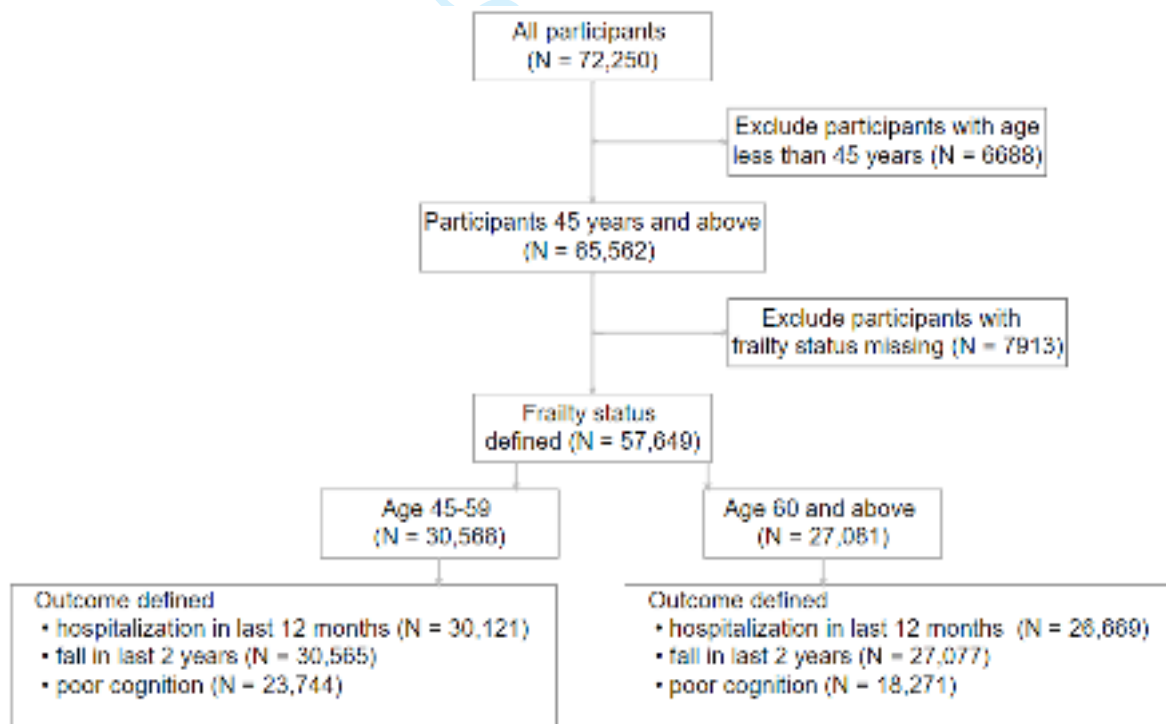**S1 Fig. Flowchart presenting selection of participants for analyses.**

1  
2  
3  
4  
5  
6  
7  
8  
9  
10  
11  
12  
13  
14  
15  
16  
17  
18  
19  
20  
21  
22  
23  
24  
25  
26  
27  
28  
29  
30  
31  
32  
33  
34  
35  
36  
37  
38  
39  
40  
41  
42  
43  
44  
45  
46

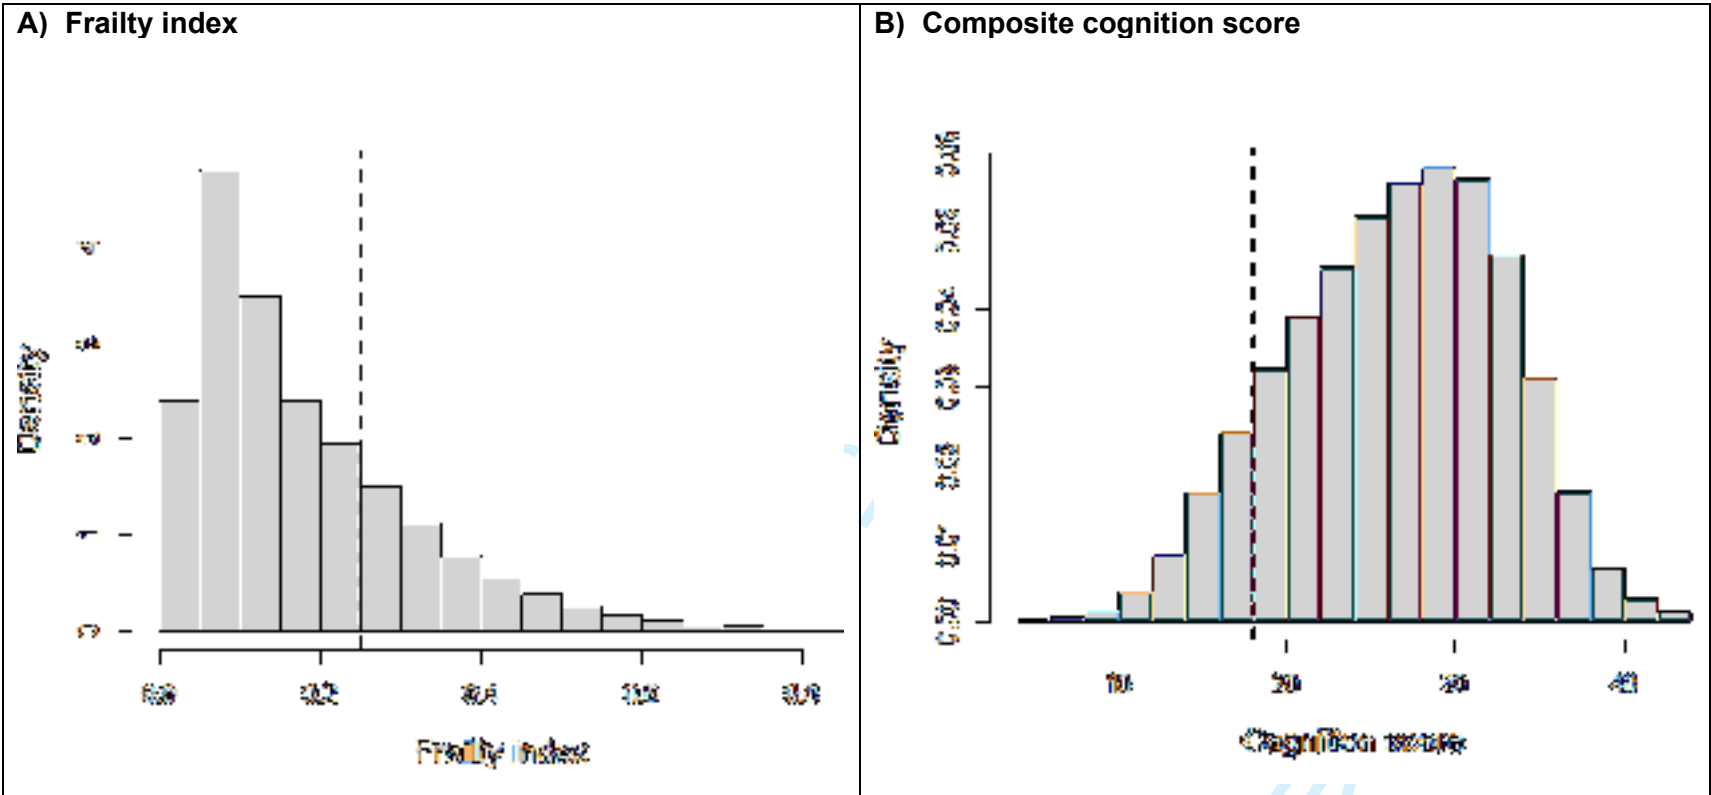

**S2 Fig. Distribution of frailty index and cognition score among 45-plus participants.** A) Frailty index had a mean value of 0.18 and standard deviation (SD) of 0.13, with values ranging from 0-0.83 and a median (IQR) of 0.14 (0.08, 0.25). The dotted line presents the cut-off 0.25. B) Composite cognition score value ranges from 4 to 43, with a mean of 27.01 (SD=6.36) and a median of 27 (IQR = 22,32). Poor cognition is defined as cognition score  $\leq 18$  (10<sup>th</sup> percentile marked as dotted line in the graph).

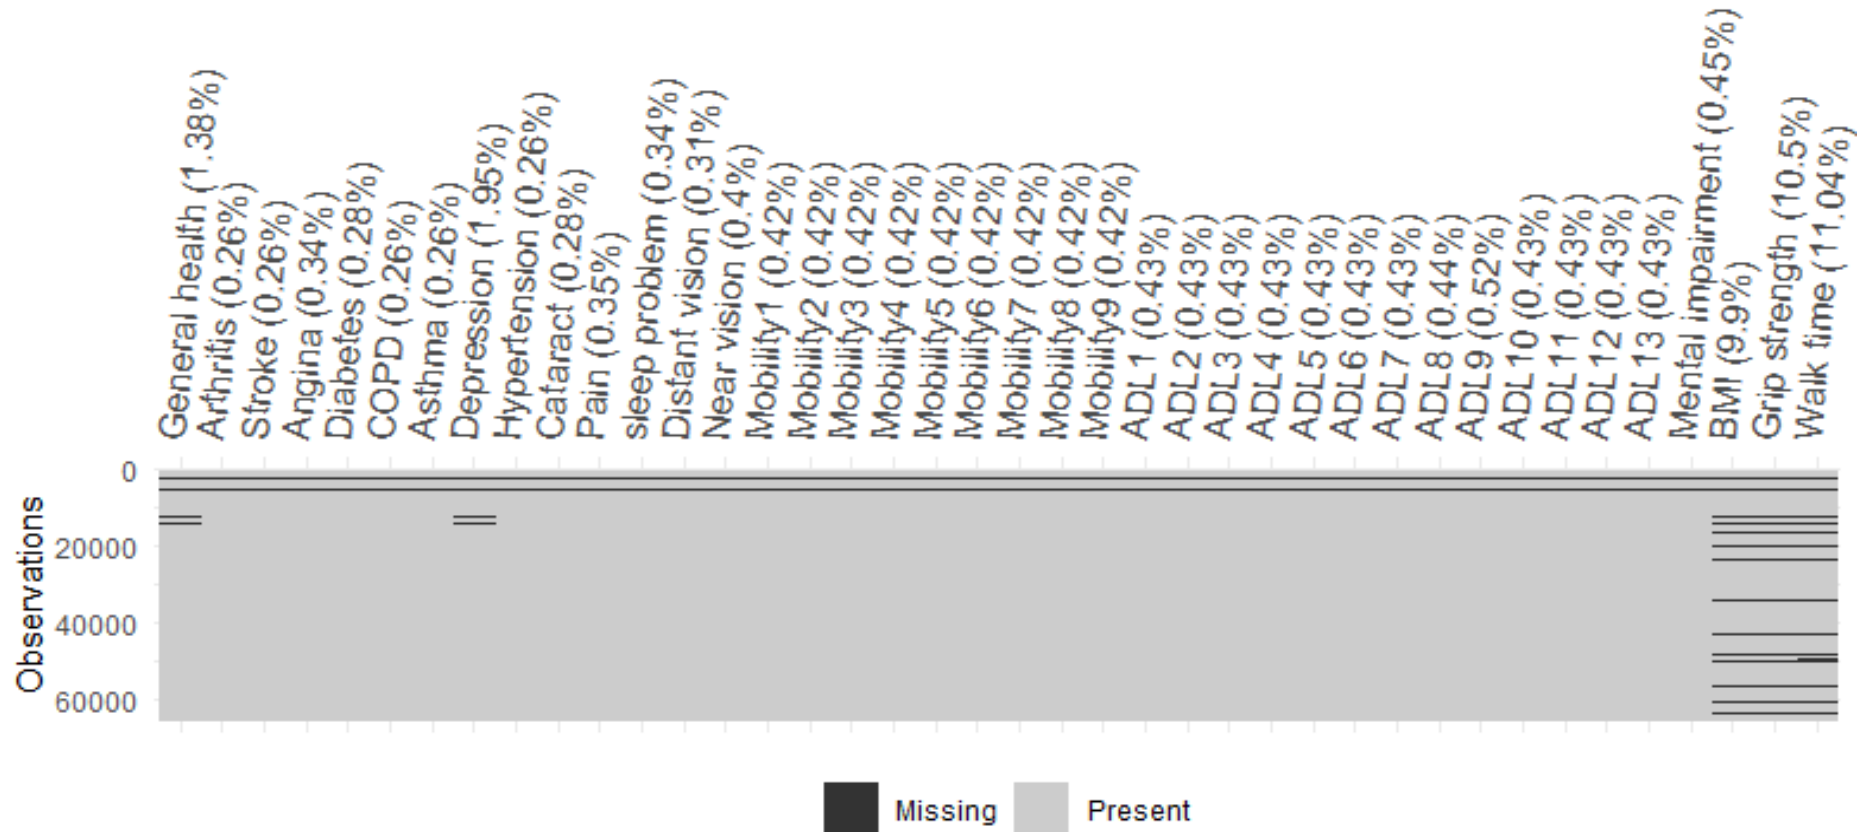

**S3 Fig. Missingness in deficit scores.** BMI:Body mass index; Mobility1:Walking 100 yards; Mobility2:Sitting for 2 hours or more; Mobility3:Getting up from a chair after sitting for long period; Mobility4:Climbing one flight of stairs without resting ; Mobility5:Stooping, kneeling or crouching; Mobility6:Reaching or extending arms above shoulder level (either arm); Mobility7:Pulling or pushing large objects; Mobility8:Lifting or carrying weights over 5 kilos, like a heavy bag of groceries; Mobility9:Picking up a coin from a table; Activities of Daily Living (ADL) 1:Dressing, including putting on chappals, shoes, etc.; ADL2:Walking across a room; ADL3:Bathing; ADL4:Eating; ADL5:Getting in or out of bed; ADL6:Using the toilet, including getting up and down; ADL7:Preparing a hot meal (cooking and serving); ADL8:Shopping for groceries; ADL9:Making telephone calls; ADL10:Taking medications; ADL11:Doing work around the house or garden; ADL12:Managing money, such as paying bills and keeping track of expenses; ADL13:Getting around or finding address in unfamiliar place.

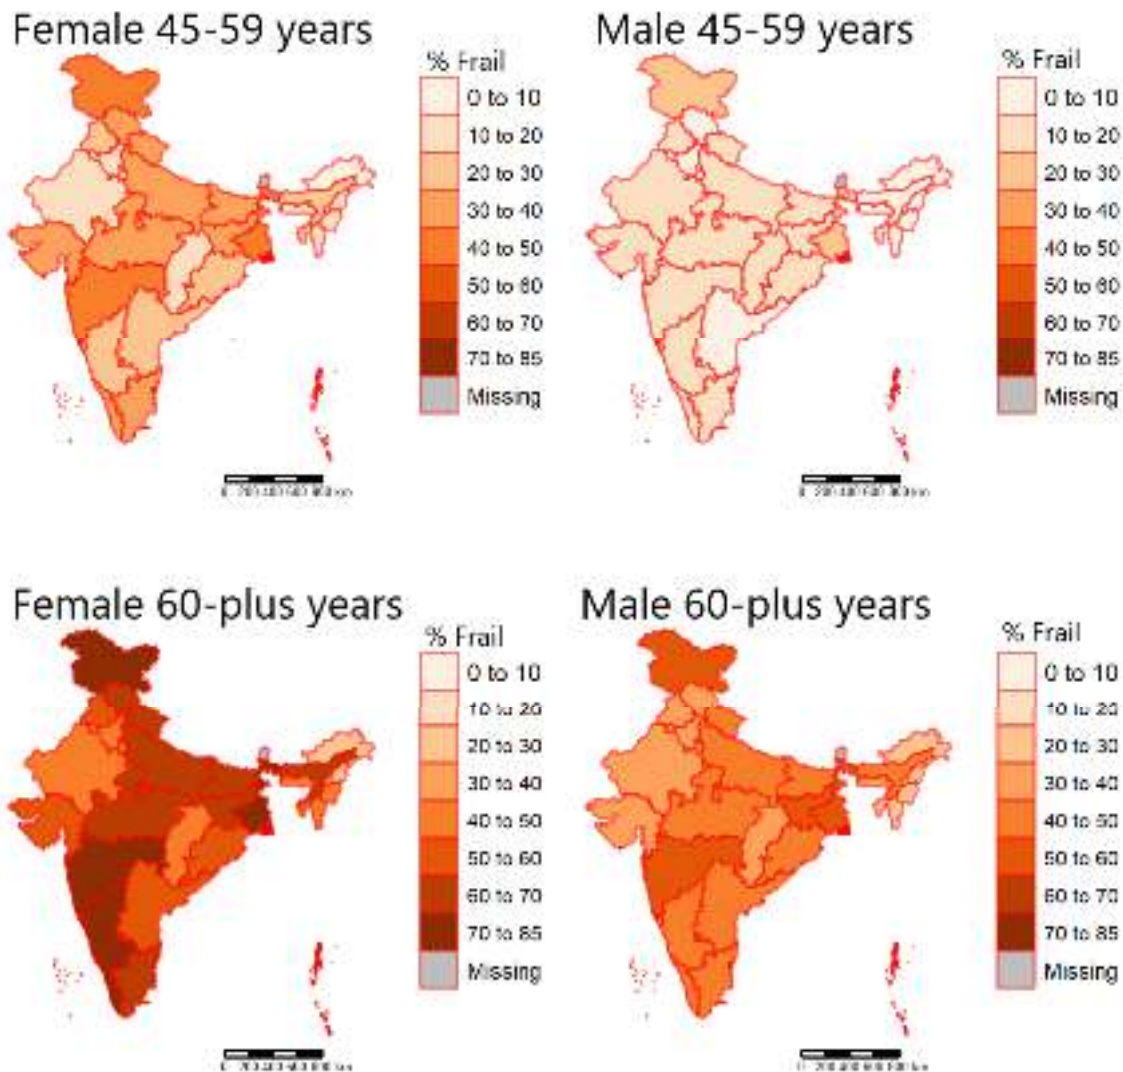

**S4 Fig. Prevalence of frailty across states, in middle-aged and elderly men and women.** Individuals with frailty index > 0.21 were considered as frail. Prevalence estimates are weighted, using state-level individual sampling weights provided in data.

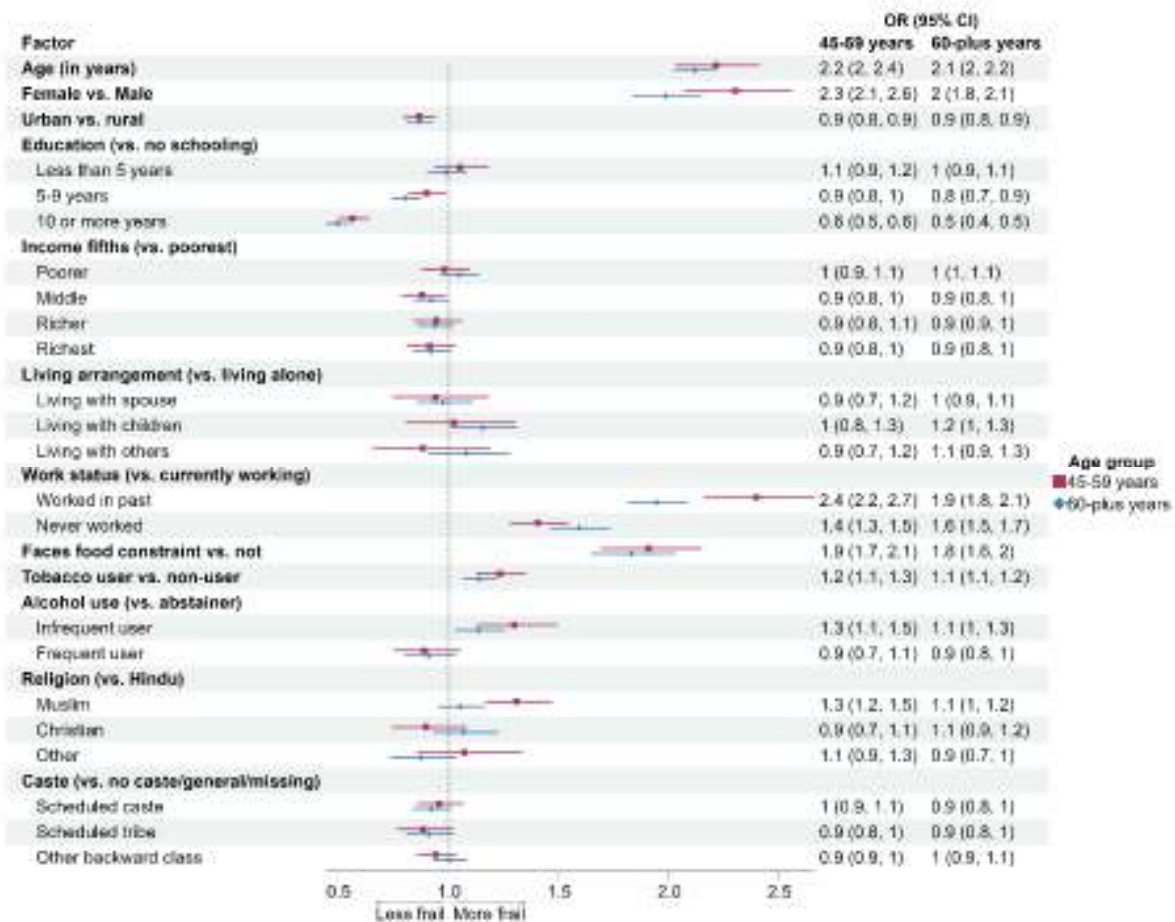

**S5 Fig. Forest plot of adjusted odds ratios (95% CI) for frailty, by participants' background characteristics, using income as the economic indicator.** Annual per capita household income is used as the economic indicator, instead of monthly per capita consumption expenditure. Per capita household income is computed by aggregating income from all sources (agricultural and non-agricultural business, wage/salary, pension and transfers) and dividing by the number of household members.

STROBE Statement—Checklist of items that should be included in reports of *cross-sectional studies*

|                              | Item No | Recommendation                                                                                                                                                                       | Page No                                               |
|------------------------------|---------|--------------------------------------------------------------------------------------------------------------------------------------------------------------------------------------|-------------------------------------------------------|
| <b>: Title and abstract</b>  | 1       | (a) Indicate the study's design with a commonly used term in the title or the abstract                                                                                               | Abstract: Methods                                     |
|                              |         | (b) Provide in the abstract an informative and balanced summary of what was done and what was found                                                                                  | Abstract Methods, Results                             |
| <b>Introduction</b>          |         |                                                                                                                                                                                      |                                                       |
| Background/rationale         | 2       | Explain the scientific background and rationale for the investigation being reported                                                                                                 | Background paragraphs 1-3                             |
| Objectives                   | 3       | State specific objectives, including any prespecified hypotheses                                                                                                                     | Background paragraph 4                                |
| <b>Methods</b>               |         |                                                                                                                                                                                      |                                                       |
| Study design                 | 4       | Present key elements of study design early in the paper                                                                                                                              | Methods subsection <i>Data</i>                        |
| Setting                      | 5       | Describe the setting, locations, and relevant dates, including periods of recruitment, exposure, follow-up, and data collection                                                      | Methods subsection <i>Data</i>                        |
| Participants                 | 6       | (a) Give the eligibility criteria, and the sources and methods of selection of participants                                                                                          | Methods subsection <i>Data</i> , S1 Fig               |
| Variables                    | 7       | Clearly define all outcomes, exposures, predictors, potential confounders, and effect modifiers. Give diagnostic criteria, if applicable                                             | Methods subsection <i>Variables</i>                   |
| Data sources/<br>measurement | 8*      | For each variable of interest, give sources of data and details of methods of assessment (measurement). Describe comparability of assessment methods if there is more than one group | Methods subsection <i>Variables</i> , S1-S3 Tables    |
| Bias                         | 9       | Describe any efforts to address potential sources of bias                                                                                                                            | Methods subsection <i>Statistical analysis</i>        |
| Study size                   | 10      | Explain how the study size was arrived at                                                                                                                                            | Methods subsection <i>Data</i> , S1 Fig, S4 Table     |
| Quantitative variables       | 11      | Explain how quantitative variables were handled in the analyses. If applicable, describe which groupings were chosen and why                                                         | Methods subsection <i>Statistical analysis</i>        |
| Statistical methods          | 12      | (a) Describe all statistical methods, including those used to control for confounding                                                                                                | Methods subsection <i>Statistical analysis</i>        |
|                              |         | (b) Describe any methods used to examine subgroups and interactions                                                                                                                  | Methods subsection <i>Statistical analysis</i>        |
|                              |         | (c) Explain how missing data were addressed                                                                                                                                          | Methods subsection <i>Variables</i> , Table 1, S3 Fig |
|                              |         | (d) If applicable, describe analytical methods taking account of sampling strategy                                                                                                   | Methods subsection <i>Statistical analysis</i>        |
|                              |         | (e) Describe any sensitivity analyses                                                                                                                                                | Methods subsection <i>Variables</i>                   |

**Results**

|                          |     |                                                                                                                                                                                                                                                                                                 |                                                                            |
|--------------------------|-----|-------------------------------------------------------------------------------------------------------------------------------------------------------------------------------------------------------------------------------------------------------------------------------------------------|----------------------------------------------------------------------------|
| Participants             | 13* | (a) Report numbers of individuals at each stage of study—eg numbers potentially eligible, examined for eligibility, confirmed eligible, included in the study, completing follow-up, and analysed<br>(b) Give reasons for non-participation at each stage<br>(c) Consider use of a flow diagram | Results paragraph 1, S4 Table<br>S1 Fig<br>S1 Fig                          |
| Descriptive data         | 14* | (a) Give characteristics of study participants (eg demographic, clinical, social) and information on exposures and potential confounders                                                                                                                                                        | Results paragraph 1, Table 1                                               |
|                          |     | (b) Indicate number of participants with missing data for each variable of interest                                                                                                                                                                                                             | Table 1, Table 2, S1 Table, S3 Table, S4 Table, S3 Fig                     |
| Outcome data             | 15* | Report numbers of outcome events or summary measures                                                                                                                                                                                                                                            | S2 Fig panel A, S5 Table, Table 2, Table 3                                 |
| Main results             | 16  | (a) Give unadjusted estimates and, if applicable, confounder-adjusted estimates and their precision (eg, 95% confidence interval). Make clear which confounders were adjusted for and why they were included                                                                                    | Tables 2-3, Fig 2                                                          |
|                          |     | (b) Report category boundaries when continuous variables were categorized                                                                                                                                                                                                                       | Tables 2-3, Fig 2                                                          |
|                          |     | (c) If relevant, consider translating estimates of relative risk into absolute risk for a meaningful time period                                                                                                                                                                                | NA                                                                         |
| Other analyses           | 17  | Report other analyses done—eg analyses of subgroups and interactions, and sensitivity analyses                                                                                                                                                                                                  | Results subsections <i>Sex differences</i> and <i>Sensitivity analyses</i> |
| <b>Discussion</b>        |     |                                                                                                                                                                                                                                                                                                 |                                                                            |
| Key results              | 18  | Summarise key results with reference to study objectives                                                                                                                                                                                                                                        | Discussion para 1                                                          |
| Limitations              | 19  | Discuss limitations of the study, taking into account sources of potential bias or imprecision. Discuss both direction and magnitude of any potential bias                                                                                                                                      | Discussion para 6                                                          |
| Interpretation           | 20  | Give a cautious overall interpretation of results considering objectives, limitations, multiplicity of analyses, results from similar studies, and other relevant evidence                                                                                                                      | Conclusion                                                                 |
| Generalisability         | 21  | Discuss the generalisability (external validity) of the study results                                                                                                                                                                                                                           | Discussion para 2-5                                                        |
| <b>Other information</b> |     |                                                                                                                                                                                                                                                                                                 |                                                                            |
| Funding                  | 22  | Give the source of funding and the role of the funders for the present study and, if applicable, for the original study on which the present article is based                                                                                                                                   | Declarations subsection <i>Funding</i>                                     |

\*Give information separately for exposed and unexposed groups.

**Note:** An Explanation and Elaboration article discusses each checklist item and gives methodological background and published examples of transparent reporting. The STROBE checklist is best used in conjunction with this article (freely available on the Web sites of PLoS Medicine at <http://www.plosmedicine.org/>, Annals of Internal Medicine at



1  
2  
3  
4  
5  
6  
7  
8  
9  
10  
11  
12  
13  
14  
15  
16  
17  
18  
19  
20  
21  
22  
23  
24  
25  
26  
27  
28  
29  
30  
31  
32  
33  
34  
35  
36  
37  
38  
39  
40  
41  
42  
43  
44  
45  
46  
47  
48  
49  
50  
51  
52  
53  
54  
55  
56  
57  
58  
59  
60

<http://www.annals.org/>, and *Epidemiology* at <http://www.epidem.com/>). Information on the STROBE Initiative is available at [www.strobe-statement.org](http://www.strobe-statement.org).

For peer review only

# BMJ Open

## Frailty among middle-aged and older women and men in India: Findings from Wave 1 of the Longitudinal Aging Study in India

|                                 |                                                                                                                                                                                                                                                                                                                                                                                                                        |
|---------------------------------|------------------------------------------------------------------------------------------------------------------------------------------------------------------------------------------------------------------------------------------------------------------------------------------------------------------------------------------------------------------------------------------------------------------------|
| Journal:                        | <i>BMJ Open</i>                                                                                                                                                                                                                                                                                                                                                                                                        |
| Manuscript ID                   | bmjopen-2023-071842.R1                                                                                                                                                                                                                                                                                                                                                                                                 |
| Article Type:                   | Original research                                                                                                                                                                                                                                                                                                                                                                                                      |
| Date Submitted by the Author:   | 23-Jun-2023                                                                                                                                                                                                                                                                                                                                                                                                            |
| Complete List of Authors:       | Ghosh, Arpita; The George Institute for Global Health India; Manipal Academy of Higher Education<br>Kundu, Monica; The George Institute for Global Health India<br>Devasenapathy, Niveditha; The George Institute for Global Health India<br>Woodward, Mark; The George Institute for Global Health; Imperial College London<br>Jha, Vivekanand; The George Institute for Global Health India; Imperial College London |
| <b>Primary Subject Heading</b>: | Public health                                                                                                                                                                                                                                                                                                                                                                                                          |
| Secondary Subject Heading:      | Geriatric medicine, Epidemiology, General practice / Family practice, Health services research, Patient-centred medicine                                                                                                                                                                                                                                                                                               |
| Keywords:                       | EPIDEMIOLOGY, GERIATRIC MEDICINE, PUBLIC HEALTH, Quality of Life                                                                                                                                                                                                                                                                                                                                                       |
|                                 |                                                                                                                                                                                                                                                                                                                                                                                                                        |

SCHOLARONE™  
Manuscripts



I, the Submitting Author has the right to grant and does grant on behalf of all authors of the Work (as defined in the below author licence), an exclusive licence and/or a non-exclusive licence for contributions from authors who are: i) UK Crown employees; ii) where BMJ has agreed a CC-BY licence shall apply, and/or iii) in accordance with the terms applicable for US Federal Government officers or employees acting as part of their official duties; on a worldwide, perpetual, irrevocable, royalty-free basis to BMJ Publishing Group Ltd ("BMJ") its licensees and where the relevant Journal is co-owned by BMJ to the co-owners of the Journal, to publish the Work in this journal and any other BMJ products and to exploit all rights, as set out in our [licence](#).

The Submitting Author accepts and understands that any supply made under these terms is made by BMJ to the Submitting Author unless you are acting as an employee on behalf of your employer or a postgraduate student of an affiliated institution which is paying any applicable article publishing charge ("APC") for Open Access articles. Where the Submitting Author wishes to make the Work available on an Open Access basis (and intends to pay the relevant APC), the terms of reuse of such Open Access shall be governed by a Creative Commons licence – details of these licences and which [Creative Commons](#) licence will apply to this Work are set out in our licence referred to above.

Other than as permitted in any relevant BMJ Author's Self Archiving Policies, I confirm this Work has not been accepted for publication elsewhere, is not being considered for publication elsewhere and does not duplicate material already published. I confirm all authors consent to publication of this Work and authorise the granting of this licence.

1  
2  
3 Frailty among middle-aged and older women and men in India: Findings from Wave 1 of the  
4  
5 Longitudinal Aging Study in India  
6  
7  
8  
9

10 Arpita Ghosh<sup>1,2</sup>, Monica Kundu<sup>3</sup>, Niveditha Devasenapathy<sup>3</sup>, Mark Woodward<sup>4,5</sup>, Vivekanand  
11  
12 Jha<sup>1,2,5\*</sup>  
13  
14  
15  
16  
17

18 <sup>1</sup> The George Institute for Global Health, University of New South Wales, New Delhi, India.  
19

20 <sup>2</sup> Prasanna School of Higher Education, Manipal Academy of Higher Education, Manipal,  
21  
22 India.  
23  
24

25 <sup>3</sup> The George Institute for Global Health, New Delhi, India.  
26  
27

28 <sup>4</sup> The George Institute for Global Health, University of New South Wales, Sydney, Australia.  
29  
30

31 <sup>5</sup> The George Institute for Global Health, School of Public Health, Imperial College London,  
32  
33 London, UK.  
34  
35

36  
37  
38  
39 \* Corresponding author  
40

41  
42 E-mail: v.jha@imperial.ac.uk  
43  
44  
45  
46  
47  
48  
49  
50  
51  
52  
53  
54  
55  
56  
57  
58  
59  
60

## Abstract

**Objectives:** Few studies have examined frailty in Indian adults, despite an increasing population of older adults and an escalating burden of chronic diseases. We aimed to study the prevalence and correlates of frailty in middle-aged and older Indian adults.

**Setting:** Cross-sectional data from Wave 1 of Longitudinal Ageing Study in India, conducted in 2017-2018 across all states and union territories, were used.

**Participants:** The final analytical sample included 57,649 participants aged 45 years and above who had information on frailty status.

**Primary outcome measure:** The deficits accumulation approach to measuring frailty was employed, creating a frailty index between 0 and 1, based on 40 deficits. Individuals with a frailty index of 0.25 or more were defined as 'frail'.

**Results:** Prevalence of frailty among 45-plus adults was 30%. 60-plus women were twice as likely to be frail compared to 60-plus men, after adjusting for a wide range of sociodemographic, economic and lifestyle factors. The sex difference was more pronounced in 45-59-year-olds. Odds of hospitalization in the last 12 months, and having falls in the past two years, were twice as high in frail adults compared to non-frail adults. Frail middle-aged and older adults had 33% and 39% higher odds, respectively, of having poor cognition than non-frail adults. The relative increase was higher in women for all three outcomes, although not statistically significant.

**Conclusions:** There needs to be careful consideration of sex differences when addressing frailty, particularly for optimizing frailty interventions. Frailty, although typically assessed in older adults, was shown in this study to be also prevalent and associated with adverse outcomes in middle-aged Indian adults. More research into assessment of frailty in younger populations, its trajectory and correlates may help develop public health measures for prevention of frailty.

## Strengths and limitations

1. The analyses were based on a nationally representative sample of 45-plus-year-old Indian adults from all states and union territories except Sikkim, allowing for estimation of national, as well as state-level, estimates of prevalence of frailty.
2. We examined prevalence of frailty, its risk factors and association with adverse outcomes in middle-aged adults, in addition to older adults.
3. Our frailty index was constructed using 40 deficits, including deficits pertaining to mental impairment and instrumental activities of daily living aimed at assessing cognitive functioning, thus capturing the multidimensionality of frailty.
4. Due to cross-sectional nature of data, we were unable to look at temporal associations between frailty and adverse health outcomes.
5. We were not able to define other frailty measures such as the frailty phenotype, based on the available data.

## Background

Frailty is characterised by a decline in functioning across multiple physiological systems, accompanied by an increased vulnerability to stressors.<sup>1</sup> As a result, frail people are more likely to have adverse health outcomes when exposed to stressors than non-frail people.<sup>2</sup> A frailty score can help identify people with unique health needs, who need intervention to address the causes of poor health and improve outcomes in them. It can therefore be useful in clinical and community settings for risk stratification. However, there are multiple approaches and various tools to measure frailty and there is considerable disagreement between these instruments.<sup>3</sup> This is, in part, responsible for the marked variation in prevalence estimates across countries, and even within countries.<sup>4</sup>

Most studies on frailty are from high-income countries (HICs).<sup>4</sup> There exist several systematic reviews across geographical regions, but studies from low- and middle-income countries (LMICs) are limited and have used a variety of methods.<sup>5</sup> A few studies have shown that frailty prevalence and incidence are higher in LMICs compared to high-income countries.<sup>4 6-8</sup> In contrast, a multicounty study comparing 14 HICs and six LMICs (China, Ghana, India, Mexico, Russian Federation and South Africa) reported a higher mean frailty index in HICs compared with the LMICs.<sup>9</sup> However, interpretation of differences in prevalence between countries or regions is limited by the few data from LMICs. In a recent systematic review on the prevalence of frailty in LMICs, only one of the 56 studies was from a low-income country (Tanzania) and only two were from a lower middle-income country (India); the rest were from upper middle-income countries – Brazil, Colombia, Mexico, Chile, Cuba, China, Malaysia, Russia, Turkey and Lebanon.<sup>5</sup> Robust disaggregated data on frailty in the Indian population are rare,<sup>10-14</sup> whilst no studies have provided subnational estimates on the prevalence of frailty.

Further, while there are many frailty studies amongst adults aged 60 years and above,<sup>4 5 8 15-17</sup> the extent of the problem and its significance in adults less than 60 years is poorly understood. Studies have shown that frailty is prevalent in younger adults and suggested

1  
2  
3 that it be examined across the adult age spectrum.<sup>18-20</sup> This is especially true for India where  
4 chronic diseases develop a decade earlier than in HICs.<sup>21</sup> Furthermore, studies  
5 characterizing sex differences in frailty, and how frailty differently impacts health outcomes in  
6 women and men are rare in LMICs.<sup>12 22-26</sup>  
7  
8  
9  
10

11  
12 With a rapidly aging population and a fragmented healthcare system, there is an urgent need  
13 to quantify frailty in India reliably, so as to inform the development of interventions and plan  
14 targeted service delivery. In this study, we examine frailty prevalence, its state-level and  
15 socioeconomic patterning and association, including sex-specific association, with key health  
16 outcomes in middle-aged (45-59-year-old) and older (60-year-plus) Indian adults.  
17  
18  
19  
20  
21  
22

## 23 **Methods**

### 24 **Data**

25  
26 We used data from Wave 1 of the Longitudinal Ageing Study in India (LASI), conducted in  
27 2017-2019 in all of India's states and union territories.<sup>27</sup> Detailed descriptions of sampling  
28 design, participants, questionnaires and response rates and are available elsewhere.<sup>28</sup>  
29 Briefly, LASI is a nationwide panel survey of adults aged 45 and older and their spouses,  
30 designed to provide longitudinal data on the broad domains of social, health and economic  
31 wellbeing of the elderly Indian population. Data include demographics, household economic  
32 status, mental health, functional health, biomarkers, health insurance and healthcare  
33 utilization, family and social networks, welfare programmes, work and employment,  
34 retirement, and life satisfaction. While measures in LASI are specific and sensitive to the  
35 Indian context, they have been harmonized with international surveys on ageing and  
36 retirement. LASI adopted a multistage stratified cluster sampling design. Data from LASI  
37 wave 1 include 65,562 45-plus individuals from all states and union territories except Sikkim.  
38 Data are available in the public domain and can be accessed by filling out form available at  
39 [https://iipsindia.ac.in/sites/default/files/LASI\\_DataRequestForm\\_0.pdf](https://iipsindia.ac.in/sites/default/files/LASI_DataRequestForm_0.pdf).<sup>29</sup>  
40  
41  
42  
43  
44  
45  
46  
47  
48  
49  
50  
51  
52  
53  
54  
55  
56  
57  
58  
59  
60



## Variables

### *Assessment of frailty*

We used the frailty index measure based on a deficit accumulation approach, proposed by Rockwood and colleagues.<sup>30</sup> We included 40 deficits across different domains<sup>31</sup> – general health (1 deficit), diagnosed conditions (9 deficits), medical symptoms (4 deficits), mobility restrictions (9 deficits), basic Activities of Daily Living (ADL) and Instrumental Activities of Daily Living (IADL) limitations (13 deficits), any mental impairment (1 deficit), body mass index (1 deficit), grip strength (1 deficit) and gait speed (1 deficit). All deficits were assigned scores between 0 and 1, with 1 indicating complete deficit and 0 lack of any deficit. A detailed description is presented in **S1 Table. Error! Reference source not found.** The frailty index is the sum of deficit scores divided by the total number of deficits considered (40 in our case), yielding a continuous score between 0 and 1. This index will be missing for an individual with missing data on any deficit. We used a cut-off of 0.25 to define presence or absence of frailty<sup>32-34</sup> – individuals with frailty index  $\geq 0.25$  were defined as ‘frail’ and others as ‘non-frail’.

In sensitivity analyses, we explored another commonly used frailty index cut-off, 0.21<sup>35</sup>. Also, an alternative approach to calculating the frailty index that accounts for missing deficit scores was examined – up to 3 deficits were allowed to be missing and the frailty index for an individual was calculated by summing the non-missing health deficit scores and then dividing by the total number of deficits measured in that individual.

### *Covariates*

Demographic, socioeconomic and lifestyle factors were included as covariates – age, sex, place of residence, educational status, living arrangement, monthly per capita consumption expenditure (MPCE), working status, food constraint, religion, caste, tobacco use, alcohol use and region. Food constraint referred to household food unavailability in the past 12 months. MPCE was defined as total monthly household consumption expenditure divided by household size. Expenditure here includes the household’s per capita spending on food and

1  
2  
3 non-food items, including spending on health, education, and utilities. We used consumption  
4 expenditure as our economic indicator as we consider this a better measure of living  
5 standards and poverty than income. Also, household income information was missing for  
6 1216 45-plus adults. As part of sensitivity analyses, we examined annual per capita  
7 household income as the economic indicator.  
8  
9  
10  
11  
12

### 13 *Adverse outcomes*

14  
15  
16 The respondents were asked about **number of hospitalizations** and **number of nights**  
17 **spent in the hospital in the last 12 months**. In addition to these count outcome variables,  
18 a binary outcome variable, **ever hospitalised in last 12 months**, was defined based on the  
19 number of hospitalizations (**S2 Table**). Another binary outcome variable, **any fall in past 2**  
20 **years**, was defined based on responses to questions about having fallen down or sustaining  
21 a major injury from a fall in the past 2 years (**S2 Table**).  
22  
23  
24  
25  
26  
27  
28  
29

30 Cognitive measures in LASI were derived from the cognition module of the Health and  
31 Retirement Study – Harmonized Cognitive Assessment Protocol.<sup>36</sup> A detailed description of  
32 the different cognitive domains measured in LASI is presented in **S3 Table**. A composite  
33 **cognition score**, ranging from 0 to 43, was constructed by combining scores across five  
34 domains: memory, orientation, arithmetic function, executive functioning skills, and object  
35 naming). A higher score indicated better cognitive ability and **poor cognition** was defined as  
36 a score below the 10<sup>th</sup> percentile, which was 18.  
37  
38  
39  
40  
41  
42  
43  
44

### 45 **Statistical analyses**

46  
47 Continuous variables were summarized as mean and standard deviation (SD) or median and  
48 interquartile interval (IQI) and categorical variables as frequencies and percentages. State-  
49 and national-level sampling weights were used to produce weighted prevalence estimates.  
50  
51 Multivariable logistic regressions were used to obtain odds ratios (ORs), with 95%  
52 confidence intervals (CIs) for the association between frailty status (frail vs. non-frail) and  
53 individuals' background characteristics – sex, age, place of residence, education,  
54  
55  
56  
57  
58  
59  
60

1  
2  
3 consumption expenditure, living arrangement, work status, food constraint, tobacco use,  
4 alcohol use, religion, and caste, separately for the middle-aged and older participants. Age  
5 was analysed as a continuous variable, and all other variables were treated as categorical.  
6  
7 Logistic and linear regressions were used to study associations between frailty status (frail  
8 vs. non-frail) and binary and continuous adverse outcomes, respectively. Poisson hurdle  
9 models were used for count outcomes with a high percentage of zeros – number of  
10 hospitalizations and number of nights spent in hospital in last 12 months. The Poisson hurdle  
11 model specifies a logistic regression for the zero counts and a truncated (at zero) Poisson  
12 model for the positive counts.<sup>37</sup> The association between frailty status and cognition score  
13 was examined using linear regression. All regressions examining associations between  
14 frailty and adverse outcomes were adjusted for participants' background characteristics. Sex  
15 differences in the associations with binary adverse outcomes were studied using the full  
16 interaction model, with all main effects and sex interactions with frailty as well as each  
17 confounding variable; sex-specific ORs were compared through women-to-men ratios of  
18 odds ratios (RORs).<sup>38</sup> All regressions were adjusted for state fixed effects to account for  
19 state-level variation. All statistical analyses were carried out using Stata 13 (StataCorp LP,  
20 College Station, Texas, USA) and R version 4.2.0.<sup>39 40</sup>

## 39 **Patient and public involvement**

40 Patients or the public were not involved in this secondary analysis of publicly available  
41 survey data.

## 42 **Results**

### 43 **Description of study participants**

44 LASI included 34,098 middle-aged adults (45-59 years) and 31,464 older adults (60 years  
45 and above). 7,913 participants for whom information related to frailty was missing were  
46 excluded from analyses, resulting in a total sample of 57,649 participants. Participants were  
47 further excluded while studying associations with outcomes, because of missing outcome  
48  
49  
50  
51  
52  
53  
54  
55  
56  
57  
58  
59  
60

data (**S1 Fig**). There were small differences between participants with missing frailty information and those included in analyses (**S4 Table**). Participants with missing frailty data (n=7,913) were more likely to be older, residing in urban areas, living with children and/or others and not working currently. Of the 57,649 study participants, 55% of middle-aged adults and 52% of older participants were female (**Table 1**). Around 60% of the participants had no or less than 5 years of schooling, 66% lived in the rural areas, around a quarter had never worked, and 82% and 63% reported never consuming alcohol and never using any tobacco product, respectively.

**Table 1. Characteristics of study participants.**

| Characteristic                              | Overall,<br>N = 57,649 | 45-60 years,<br>N = 30,568 | 60-plus years,<br>N = 27,081 |
|---------------------------------------------|------------------------|----------------------------|------------------------------|
| <b>Sex</b>                                  |                        |                            |                              |
| Female                                      | 30,874 (54%)           | 16,912 (55%)               | 13,962 (52%)                 |
| Male                                        | 26,775 (46%)           | 13,656 (45%)               | 13,119 (48%)                 |
| <b>Age, Median (Q1 – Q3)*</b>               | 58 (50, 66)            | 51 (48, 55)                | 67 (63, 72)                  |
| <b>Place of residence</b>                   |                        |                            |                              |
| Rural                                       | 37,805 (66%)           | 19,730 (65%)               | 18,075 (67%)                 |
| Urban                                       | 19,844 (34%)           | 10,838 (35%)               | 9,006 (33%)                  |
| <b>Educational status</b>                   |                        |                            |                              |
| No schooling                                | 26,961 (47%)           | 12,562 (41%)               | 14,399 (53%)                 |
| Less than 5 years                           | 6,738 (12%)            | 3,404 (11%)                | 3,334 (12%)                  |
| 5 to 9 years                                | 13,280 (23%)           | 7,995 (26%)                | 5,285 (20%)                  |
| 10 years or more                            | 10,670 (19%)           | 6,607 (22%)                | 4,063 (15%)                  |
| <b>MPCE fifths†</b>                         |                        |                            |                              |
| Poorest                                     | 11,358 (20%)           | 5,846 (19%)                | 5,512 (20%)                  |
| Poorer                                      | 11,673 (20%)           | 6,067 (20%)                | 5,606 (21%)                  |
| Middle                                      | 11,676 (20%)           | 6,081 (20%)                | 5,595 (21%)                  |
| Richer                                      | 11,633 (20%)           | 6,276 (21%)                | 5,357 (20%)                  |
| Richest                                     | 11,309 (20%)           | 6,298 (21%)                | 5,011 (19%)                  |
| <b>Living arrangement</b>                   |                        |                            |                              |
| Living alone                                | 2,034 (3.5%)           | 627 (2.1%)                 | 1,407 (5.2%)                 |
| Living with spouse with or without children | 42,607 (74%)           | 25,346 (83%)               | 17,261 (64%)                 |
| Living with children and others             | 10,709 (19%)           | 3,641 (12%)                | 7,068 (26%)                  |
| Living with others only                     | 2,299 (4.0%)           | 954 (3.1%)                 | 1,345 (5.0%)                 |
| <b>Employment</b>                           |                        |                            |                              |
| Currently working§                          | 28,939 (50%)           | 19,365 (63%)               | 9,574 (35%)                  |
| Worked in the past                          | 13,045 (23%)           | 2,961 (9.7%)               | 10,084 (37%)                 |
| Never worked                                | 15,665 (27%)           | 8,242 (27%)                | 7,423 (27%)                  |
| <b>Food constraint¶</b>                     |                        |                            |                              |
| No                                          | 53,801 (93%)           | 28,624 (94%)               | 25,177 (93%)                 |
| Yes                                         | 3,848 (6.7%)           | 1,944 (6.4%)               | 1,904 (7.0%)                 |
| <b>Tobacco use</b>                          |                        |                            |                              |
| Never used tobacco                          | 36,252 (63%)           | 19,919 (65%)               | 16,333 (60%)                 |

|                                                        |              |              |              |
|--------------------------------------------------------|--------------|--------------|--------------|
| Current/past user                                      | 21,373 (37%) | 10,633 (35%) | 10,740 (40%) |
| Missing                                                | 24           | 16           | 8            |
| <b>Alcohol use</b>                                     |              |              |              |
| Never consumed                                         | 47,218 (82%) | 24,848 (81%) | 22,370 (83%) |
| Less than once a month in past 3 months                | 6,024 (10%)  | 3,123 (10%)  | 2,901 (11%)  |
| One to three days per month or more frequently         | 4,397 (7.6%) | 2,591 (8.5%) | 1,806 (6.7%) |
| Missing                                                | 10           | 6            | 4            |
| <b>Caste</b>                                           |              |              |              |
| Scheduled caste                                        | 9,695 (17%)  | 5,278 (17%)  | 4,417 (16%)  |
| Scheduled tribe                                        | 10,140 (18%) | 5,656 (19%)  | 4,484 (17%)  |
| Other backward class                                   | 21,813 (38%) | 11,461 (37%) | 10,352 (38%) |
| None of the above/no caste or tribe/don't know/missing | 16,001 (28%) | 8,173 (27%)  | 7,828 (29%)  |
| <b>Religion</b>                                        |              |              |              |
| Hindu                                                  | 42,322 (73%) | 22,482 (74%) | 19,840 (73%) |
| Muslim                                                 | 6,806 (12%)  | 3,625 (12%)  | 3,181 (12%)  |
| Christian                                              | 5,802 (10%)  | 3,069 (10%)  | 2,733 (10%)  |
| Other                                                  | 2,719 (4.7%) | 1,392 (4.6%) | 1,327 (4.9%) |
| <b>Region</b>                                          |              |              |              |
| North                                                  | 10,537 (18%) | 5,536 (18%)  | 5,001 (18%)  |
| Central                                                | 7,975 (14%)  | 4,257 (14%)  | 3,718 (14%)  |
| East                                                   | 10,443 (18%) | 5,344 (17%)  | 5,099 (19%)  |
| Northeast                                              | 7,551 (13%)  | 4,285 (14%)  | 3,266 (12%)  |
| West                                                   | 7,580 (13%)  | 3,977 (13%)  | 3,603 (13%)  |
| South                                                  | 13,563 (24%) | 7,169 (23%)  | 6,394 (24%)  |

Numbers presented in table are unweighted.

\* Q1: first quartile, Q3: third quartile.

† MPCE: monthly per capita expenditure which is defined as total monthly household consumption expenditure divided by household size. It includes household's per capita spending on food and non-food items including spending on health, education, utilities, etc.

§ Includes Temporarily laid off, on sick or other leave, or in job training

¶ Household food unavailability in the past 12 months, where household members either reduced their meal size, did not eat even though they were hungry, or did not eat for a whole day because enough food was not available in the household.

## Prevalence of frailty

The observed frailty index values ranged between 0 and 0.83, with a median of 0.14 (IQR= 0.08 - 0.25) and mean of 0.18 (SD = 0.13) (S2 Fig, panel A). Using the cut-off of 0.25, the prevalence of frailty among adults 45 years and older was 29.5% (95% CI= 28.7 - 30.4).

1  
2  
3 Prevalence was higher among older adults compared with middle-aged adults (43.2% vs.  
4 16.2%) and among women compared to men (36.1% vs. 21.7%) (**S5 Table**). For middle-  
5 aged adults, prevalence of frailty among females was double that in males (21.4% vs. 9.6%).  
6  
7 For older participants, frailty prevalence was almost 20 percentage points higher in females  
8 than in males (52.2% vs. 33.2%).  
9  
10  
11  
12

13  
14 There was substantial geographical variation in the prevalence of frailty, ranging between  
15 8.8% in Arunachal Pradesh and 38.2% in West Bengal (**Fig 1**). Among older males, the  
16 prevalence varied between 11.8% in Nagaland and 42.7% in West Bengal. In 14 out of 35  
17 states, more than 50% of the older women were frail, with the highest prevalence in Jammu  
18 & Kashmir (69%). Region-wise, 5 out of the 7 North-eastern states covered always appeared  
19 among the bottom 8 states with lowest prevalence, for both the age groups and sexes.  
20  
21  
22  
23  
24  
25  
26  
27

### 28 **Sociodemographic, economic and lifestyle factors associated with frailty**

29  
30 Frailty prevalence varied widely across different social strata (**S5 Table**). Females had  
31 higher odds of being frail than males (OR (95% CI) = 2.3 (2, 2.5) among middle-aged adults  
32 and 2.0 (1.8, 2.1) among older adults), after adjusting for other background characteristics  
33 (**Fig 2**). Among middle-aged participants, Muslims had 32% (95% CI = 18 to 48%) higher  
34 odds of being frail, compared to Hindus; the difference was attenuated in the older ages (OR  
35 (95% CI) = 1.1 (1, 1.2)). Adjusted odds of being frail increased by 23% and 12% with one  
36 year increase in age, among middle-aged and older participants, respectively. While higher  
37 education was negatively associated with frailty, with more educated people having lower  
38 odds, the individuals in the two highest expenditure fifths were likely to be frailer than those  
39 in the lowest 20%. The odds of being frail were higher among participants from rural areas  
40 compared to urban areas, tobacco users compared to non-users, infrequent drinkers  
41 compared to abstainers, and among participants facing food constraint.  
42  
43  
44  
45  
46  
47  
48  
49  
50  
51  
52  
53  
54  
55  
56  
57  
58  
59  
60

### Association with adverse health outcomes

Six percent of the middle-aged and 8% of the older adults were hospitalised in past 12 months **Error! Reference source not found.**(Table 2). Fall in the past 2 years was recorded among 16% of middle-aged adults and 20% of older adults. The median cognition score was 27 (IQI = 22 - 32) and 7% and 15% of the middle-aged and older populations, respectively, had poor cognition, that is, were in the lowest 10% (**S2 Fig**, panel B). In both age groups, these adverse outcomes were more frequent, often double, among the frail participants compared to the non-frail. After adjusting for background characteristics of participants, frailty was associated with higher odds of all three outcomes studied – hospitalization in the last 12 months (OR (95% CI) = 2.4 (2.1, 2.7) among middle-aged adults and 2.2 (2.0, 2.4) among older adults), fall in the past two years (OR (95% CI) = 2.17 (2.01, 2.36) and 1.9 (1.77, 2.03) in middle-aged and older adults, respectively) and poor cognition (OR (95% CI) = 1.33 (1.16, 1.53) and 1.39 (1.26, 1.54) in middle-aged and older adults, respectively) (**Table 2**).

**Table 2. Association between frailty and adverse outcomes – hospitalized in last 12 months, any fall in past 2 years and poor cognition.**

| Outcome                               | 45–59-year-old adults |              |             |                       | 60-plus adults |              |             |                       |
|---------------------------------------|-----------------------|--------------|-------------|-----------------------|----------------|--------------|-------------|-----------------------|
|                                       | All                   | Non-frail    | Frail       | Adjusted* OR (95% CI) | All            | Non-frail    | Frail       | Adjusted* OR (95% CI) |
| <b>Hospitalized in last 12 months</b> |                       |              |             |                       |                |              |             |                       |
| No                                    | 28,440 (94%)          | 24,658 (95%) | 3,782 (89%) | -                     | 24,631 (92%)   | 15,364 (94%) | 9,267 (89%) | -                     |
| Yes                                   | 1,681 (5.6%)          | 1,215 (4.7%) | 466 (11%)   | 2.35 (2.09, 2.66)     | 2,038 (7.6%)   | 911 (5.6%)   | 1,127 (11%) | 2.19 (1.98, 2.42)     |
| Missing                               | 447                   | 393          | 54          |                       | 412            | 226          | 186         |                       |
| <b>Any fall in past 2 years</b>       |                       |              |             |                       |                |              |             |                       |
| No                                    | 25,651 (84%)          | 22,605 (86%) | 3,046 (71%) | -                     | 21,712 (80%)   | 14,005 (85%) | 7,707 (73%) | -                     |
| Yes                                   | 4,914 (16%)           | 3,658 (14%)  | 1,256 (29%) | 2.17 (2.01, 2.36)     | 5,365 (20%)    | 2,495 (15%)  | 2,870 (27%) | 1.9 (1.77, 2.03)      |
| Missing                               | 3                     | 3            | 0           |                       | 4              | 1            | 3           |                       |
| <b>Poor cognition†</b>                |                       |              |             |                       |                |              |             |                       |
| No                                    | 22,017 (93%)          | 19,343 (93%) | 2,674 (88%) | -                     | 15,521 (85%)   | 10,540 (88%) | 4,981 (78%) | -                     |
| Yes                                   | 1,727 (7.3%)          | 1,362 (6.6%) | 365 (12%)   | 1.33 (1.16, 1.53)     | 2,750 (15%)    | 1,375 (12%)  | 1,375 (22%) | 1.39 (1.26, 1.54)     |
| Missing                               | 6,824                 | 5,561        | 1,263       |                       | 8,810          | 4,586        | 4,224       |                       |

\*Adjusted for participants' sex, age, rural place of residence, education, consumption expenditure, living arrangement, work status, food constraint, tobacco use, alcohol use, religion, caste, and state.

† Poor cognition was defined as a cognition score below the 10<sup>th</sup> percentile, which was 18.



1  
2  
3 Being frail was associated with a 74% (95% CI = 45 – 109%) and 122% (95% CI = 83 –  
4  
5 170%) increase in mean number of hospitalizations in the last 12 months and a 15% (95%  
6  
7 CI = 10 – 21%) and 18% (95% CI = 13 – 23%) increase in mean number of nights spent in  
8  
9 the hospital in last 12 months, among the middle-aged and older adults, respectively (**Table**  
10  
11 **3**). Frailty was associated with one-unit lower cognition scores in both the age groups – the  
12  
13 mean difference, for frailty versus not, was -1.02 (-1.2, -0.84) in middle-aged adults and  
14  
15 -1.05 (-1.2, -0.89) in the older adults.  
16  
17  
18  
19  
20  
21  
22  
23  
24  
25  
26  
27  
28  
29  
30  
31  
32  
33  
34  
35  
36  
37  
38  
39  
40  
41  
42  
43  
44  
45  
46  
47  
48  
49  
50  
51  
52  
53  
54  
55  
56  
57  
58  
59  
60

For peer review only

**Table 3. Association between frailty and adverse outcomes – number of times hospitalized in last 12 months, number of nights spent in hospital in last 12 months and cognition score.**

| Outcome                                                     | 45–59-year-old adults |             |             |                                              | 60-plus adults |                |             |                                          |
|-------------------------------------------------------------|-----------------------|-------------|-------------|----------------------------------------------|----------------|----------------|-------------|------------------------------------------|
|                                                             | All                   | Non-frail   | Frail       | Adjusted* effect estimate (95% CI)           | All            | Non-frail      | Frail       | Adjusted* effect estimate (95% CI)       |
| <b>Number of times hospitalized in last 12 months</b>       |                       |             |             |                                              |                |                |             |                                          |
| N                                                           | 30,121                | 25,873      | 4,248       | Rate ratio =<br>1.74 (1.45, 2.09)            | 26,669         | 16,275         | 10,394      | Rate ratio =<br>2.22 (1.83, 2.7)         |
| Range                                                       | 0-23                  | 0-14        | 0-23        |                                              | 0-20           | 0-7            | 0-20        |                                          |
| Mean (SD)                                                   | 0.07<br>(0.42)        | 0.06 (0.33) | 0.16 (0.75) |                                              | 0.10<br>(0.43) | 0.06<br>(0.30) | 0.15 (0.58) |                                          |
| Median (IQR)                                                | 0 (0, 0)              | 0 (0, 0)    | 0 (0, 0)    |                                              | 0 (0, 0)       | 0 (0, 0)       | 0 (0, 0)    |                                          |
| <b>Number of nights spent in hospital in last 12 months</b> |                       |             |             |                                              |                |                |             |                                          |
| N                                                           | 30,120                | 25,872      | 4,248       | Rate ratio =<br>1.15 (1.1, 1.21)             | 26,669         | 16,275         | 10,394      | Rate ratio =<br>1.18 (1.13, 1.23)        |
| Range                                                       | 0-169                 | 0-169       | 0-120       |                                              | 0-120          | 0-120          | 0-90        |                                          |
| Mean (SD)                                                   | 0.34<br>(2.57)        | 0.27 (2.35) | 0.74 (3.64) |                                              | 0.48<br>(2.88) | 0.33<br>(2.43) | 0.71 (3.47) |                                          |
| Median (IQR)                                                | 0 (0, 0)              | 0 (0, 0)    | 0 (0, 0)    |                                              | 0 (0, 0)       | 0 (0, 0)       | 0 (0, 0)    |                                          |
| <b>Cognition score</b>                                      |                       |             |             |                                              |                |                |             |                                          |
| N                                                           | 23,744                | 20,705      | 3,039       | Mean difference<br>= -1.02 (-1.2, -<br>0.84) | 18,271         | 11,915         | 6,356       | Mean difference =<br>-1.05 (-1.2, -0.89) |
| Range                                                       | 7-43                  | 7-43        | 8-42        |                                              | 4-43           | 7-43           | 4-43        |                                          |
| Mean (SD)                                                   | 28 (6)                | 28 (6)      | 26 (6)      |                                              | 26 (6)         | 27 (6)         | 24 (6)      |                                          |
| Median (IQR)                                                | 28 (24, 33)           | 29 (24, 33) | 26 (22, 30) |                                              | 26 (21, 31)    | 27 (22, 31)    | 24 (19, 29) |                                          |

\*Adjusted for participants' sex, age, rural place of residence, education, consumption expenditure, living arrangement, work status, food constraint, tobacco use, alcohol use, religion, caste, and state.

## Sex differences

Of the 40 deficits that were considered, men fared worse than women only for grip strength, stroke, chronic obstructive pulmonary disease and asthma; whereas more women than men had poor general health, most diagnosed conditions, medical symptoms, mobility restrictions, difficulties with normal daily self-care activities and needed supervision or assistance, were either underweight, overweight or obese, and had slow gait speed (**S6 Table**). The sex differences in mobility restrictions and ADL/IADL limitations were especially pronounced, even in the middle-aged adults.

The adjusted odds of hospitalization in the past 12 months, falls in the past 2 years and poor cognition were higher for frail compared to non-frail adults, in both women and men. In women the ORs were higher than in men, in both the age groups. Women-to-men RORs were thus higher than unity for all three outcomes, although their CIs included zero, except for falls in past 2 years in the 60-plus age group, so that chance findings could not be ruled out (**S7 Table**).

## Sensitivity analyses

Of the 40 deficits considered, all deficits, except body mass index, grip strength and gait speed, were missing in <2% of the 45-plus participants; and these three measurements were missing in 10-11% of participants (**S3 Fig**). The frailty index calculated using non-missing health deficit scores allowed up to 3 deficits to be missing and therefore could be calculated for 64,331 participants, resulting in <2% with missing frailty index (n=1,231).

There were small differences between participants with frailty index missing (n=1,231) or not (n=64,331) (**S4 Table**). This alternative construction made no difference to the prevalence estimates – 17% of middle-aged adults and 44% of older participants were frail using this metric (**S8 Table**). ORs for the association between frailty and adverse outcomes were also similar (**S9 Table**), suggesting that findings hold true irrespective of the proportion missing frailty information.

1  
2  
3 Using an alternative cut-off value of 0.21,<sup>35 41</sup> the prevalence of frailty increased to 37%.

4  
5 Even though frailty prevalence was inevitably higher using this cut-off (**S8 Table and S4**  
6  
7 **Fig**), the associations with adverse outcomes were similar (**S9 Table**).

8  
9  
10 No association between frailty and income was found after adjusting for other factors, when  
11  
12 using household income instead of consumption expenditure as the economic indicator in  
13  
14 analysis exploring sociodemographic, economic and lifestyle factors associated with frailty  
15  
16 (**S5 Fig**).

### Box 1. Key findings

1. Frailty, typically assessed in older adults, was also prevalent in middle-aged Indian adults (43.2% in 60-plus vs. 16.2% in 45-59-year-olds).
2. The odds of frailty were twice as high in women than in men, after adjusting for background characteristics.
3. In both age groups, after adjusting for background characteristics of participants, frailty was associated with higher odds of all three outcomes studied – hospitalization in the last 12 months (OR =2.4 and 2.2 in middle-aged and older adults, respectively), fall in the past two years (2.17 and 1.9) and poor cognition (1.33 and 1.39).
4. Associations between frailty and adverse outcomes were consistently stronger for women relative to men, although not statistically significant.

## Discussion

35  
36  
37  
38 Our study provides national, as well as state-level, estimates of prevalence of frailty and its  
39  
40 association with outcomes across the age spectrum amongst 45-plus Indian adults. Our  
41  
42 study showed that frailty is common among 45-plus Indian adults and it varies across the  
43  
44 states. We found that women were more than twice as likely to be frail than men, after  
45  
46 adjusting for a wide range of factors. We showed that frailty, usually assessed only in older  
47  
48 adults, was also prevalent in 45-59-year-old middle-aged adults, and was associated with  
49  
50 hospitalization, falls and poor cognitive functioning (**Box 1**).

## Frailty prevalence in LMICs

Based on a nationally representative sample of 45-plus-year-old Indian adults, we estimated a frailty prevalence of 29.5%, using a frailty index with 40 deficits. A recent systematic review in 62 countries across the world reported a pooled frailty index prevalence of 24% (95% CI = 22 – 26%) based on 71 studies.<sup>4</sup> Region-wise, these estimates were 38% (95% CI = 37 – 39%) in Sub-Saharan Africa, 30% (95% CI = 28 – 31%) in Latin America and the Caribbean, 25% (95% CI = 19 – 32%) in Asia, 22% (95% CI = 20 – 24%) in Europe and 21% (95% CI = 11 – 33%) in Northern America. Another systematic review focussing on LMICs reported a pooled prevalence of 18.0% (95% CI = 5.8 – 35.0%) based on 4 studies using a frailty index approach.<sup>5</sup> Comparison, however, is difficult because prevalence estimates vary greatly by frailty assessment method, and estimates from studies using frailty indices are available only from few LMICs.<sup>4,5</sup> It is further compounded by differences in the cut-off value and the type of study population.

## Factors associated with frailty

Our findings are in line with associations observed in other studies – female sex,<sup>22</sup> lower education<sup>12</sup> and tobacco use<sup>42</sup> are well-known determinants of frailty. Our analyses pointed out that sex-differences in mobility restrictions and ADL/IADL limitations were especially pronounced, even among the middle-aged adults. Interestingly, we found frailty to be more prevalent in upper fifths of consumption expenditure, while many studies have shown an inverse gradient with economic well-being. We hypothesize that this may be because frail people tend to incur more healthcare expenditure, resulting in higher consumption expenditure. The positive association, however, was no longer present when per capita household income was instead used as the economic indicator. Another intriguing finding was that infrequent drinking was associated with higher odds of frailty compared to abstaining, but the same was not true for frequent drinking. Other studies have shown similar associations with infrequent and frequent alcohol intakes compared to zero consumption.<sup>20,43,44</sup> This, however, should be treated with caution, as it can be due to

1  
2  
3 residual confounding or healthy survivor bias. Our results suggest that vulnerable groups  
4 should be targeted when developing interventions to prevent and manage frailty. For  
5 achieving best results, the interventions should be customized per their needs.<sup>45</sup> For this,  
6 knowledge of underlying mechanisms is essential and should be explored in future frailty  
7 research.  
8  
9  
10  
11  
12

### 13 **Outcomes associated with frailty**

14  
15  
16 Frailty was associated with hospitalization, falls and poor cognition, across both the age  
17 groups and sexes. A systematic review of 13 prospective studies in community-dwelling  
18 older adults found physical frailty to be a predictor of hospitalisation.<sup>46</sup> The authors  
19 speculated that fall-related injuries could be one of the contributors. Another systematic  
20 review of 11 studies showed that frailty, however defined, is a significant predictor of future  
21 falls among community-dwelling older people. Fall risk according to frailty was found to be  
22 higher in men than in women. A prospective population-based study, using data from the  
23 Canadian Study of Health and Aging, showed that frailty status, defined using various  
24 criteria, is strongly associated with changes in cognition.<sup>47</sup>  
25  
26  
27  
28  
29  
30  
31  
32  
33  
34  
35

### 36 **Frailty in middle-aged adults**

37  
38 Inclusion of over 34,000 45-59-year-olds in LASI allowed us to examine frailty, its risk  
39 factors, and its association with adverse outcomes for the first time in the middle-aged Indian  
40 population. The association between frailty and hospitalization and falls was even stronger in  
41 middle-aged adults compared to older adults. Although the prevalence of frailty increases  
42 with age, it is not limited to the elderly. Studies looking into associations between frailty and  
43 adverse outcomes in middle-aged adults are rare, and they highlight the need to identify,  
44 manage, and prevent frailty across the age spectrum.<sup>20 48 49</sup> The frailty index has been  
45 validated in young and middle-aged adults in few studies and there exists limited evidence of  
46 predictive validity of frailty index in younger populations.<sup>50 51</sup> However, it is not clear if frailty,  
47 as a construct, is similar for older and younger adults.<sup>52</sup> Comparison of distribution of deficits  
48 in middle-aged and older adults (**S10 Table**) suggests that frailty in middle-aged adults is  
49  
50  
51  
52  
53  
54  
55  
56  
57  
58  
59  
60

1  
2  
3 probably due to long-term health problems that adversely affect their overall functioning.

4  
5 More studies are needed to understand how frailty can be conceptualized and measured in  
6  
7 middle-aged and younger adults, and whether assessing frailty in them makes any  
8  
9 difference to their health or the care they receive.  
10

## 11 **Strengths and limitations**

12  
13  
14 Our study has many strengths. First, our study provides frailty prevalence estimates among  
15  
16 45-plus adults for all Indian states and union territories (except Sikkim), in addition to a  
17  
18 national prevalence estimate. Second, we examined prevalence of frailty, its risk factors and  
19  
20 association with adverse outcomes in middle-aged adults, in addition to older adults. Third,  
21  
22 our frailty index was constructed using 40 deficits, 30 being the minimum number to ensure  
23  
24 sufficient accuracy in predicting adverse events. We included deficits pertaining to mental  
25  
26 impairment and instrumental activities of daily living aimed at assessing cognitive  
27  
28 functioning, thus capturing the multidimensionality of frailty. Finally, the sensitivity analyses  
29  
30 helped demonstrate that our findings about variation in frailty and its association with  
31  
32 outcomes are robust to the cut-off used to define frailty.  
33  
34

35  
36 We also recognize certain limitations. First, we were not able to define other frailty measures  
37  
38 such as the frailty phenotype, based on available data. Given that prevalence estimates vary  
39  
40 widely depending on the assessment method,<sup>4 5 11 41</sup> it would have been more informative if  
41  
42 we were able to compare our findings using other frailty measures. Second, our cross-  
43  
44 sectional study is unable to look at temporal associations between frailty and adverse health  
45  
46 outcomes. LASI is designed as a panel study and data from subsequent waves will allow for  
47  
48 examination of temporal associations in the future. Third, LASI employed a multistage  
49  
50 cluster sampling design but variables identifying participants belonging to the same cluster  
51  
52 have not been made publicly available, limiting our ability to account for the cluster sampling  
53  
54 design in analyses and generate robust standard errors.<sup>53</sup> Fourth, there is but limited  
55  
56 evidence to support the use of frailty index in middle-aged adults<sup>52 54 55</sup> and future research  
57  
58 should explore suitable frailty measures and cut-offs.  
59  
60

## Conclusion

Our study has implications for healthcare delivery planning. We show that women are significantly more likely to be frail compared with men, across both age groups studied.

These high levels of frailty among women will have a significant impact on patient-reported and clinical outcomes. Strategies to mitigate frailty should consider these sex differences.

Also, we have demonstrated that frailty is prevalent in 45-59-year-old middle-aged adults, exhibits social patterning and is associated with adverse outcomes, suggesting that younger adults may be identified as frail and may benefit from early detection and delivery of timely care. In a resource-constrained setting such as India, the focus must be on prevention and early detection of frailty. Both management of risk factors and screening for frailty have to be implemented, preferably at the primary care level. Given the strong links between social inequalities and frailty, marginalized populations must be prioritized.

## Declarations

### Ethics approval and consent to participate

Not applicable. We used LASI survey data available in the public domain from the International Institute for Population Sciences website. Ethics approval for LASI survey was granted by all collaborating institutions and the Indian Council for Medical Research. Written informed consent was obtained for household survey, individual survey, and dried blood spot collection.

### Availability of data and materials

LASI survey data are available in the public domain from the International Institute for Population Sciences (IIPS) website. Application has to be made for access to data and access is granted after review by IIPS for legitimate academic research purposes. Link for application can be accessed at <https://www.iipsindia.ac.in/content/LASI-data>.



## Competing interests

AG, MK and ND have no conflicts of interest to declare. MW is a consultant to Amgen, and Freeline. VJ has received grant funding from GSK, Baxter Healthcare, and Biocon and honoraria from Bayer, AstraZeneca, Boeringer Ingelheim, NephroPlus and Zydus Cadilla, under the policy of all honoraria being paid to the organization.

## Funding

No funding was received to conduct this study.

LASI Wave 1 was financially supported by Ministry of Health and Family Welfare, Govt. of India, National Institute on Aging (NIA/NIH), USA and United Nations Population Fund, India.

## Authors' contributions

AG and MK conceived the idea for the study, performed literature review, conducted data preparation, carried out statistical analyses and wrote the first draft. All authors contributed to interpretation of the study findings. VJ, MW, ND and AG contributed to reviewing and editing the final draft. All authors have read and approved the final manuscript.

## Acknowledgements

We would like to thank International Institute for Population Sciences, LASI survey team and study participants who made this analysis possible.

## References

1. Hoogendijk EO, Afilalo J, Ensrud KE, et al. Frailty: implications for clinical practice and public health. *The Lancet* 2019;394(10206):1365-75.
2. Clegg A, Young J, Iliffe S, et al. Frailty in elderly people. *The lancet* 2013;381(9868):752-62.
3. Aguayo GA, Donneau A-F, Vaillant MT, et al. Agreement between 35 published frailty scores in the general population. *American journal of epidemiology* 2017;186(4):420-34.
4. O'Caomh R, Sezgin D, O'Donovan MR, et al. Prevalence of frailty in 62 countries across the world: a systematic review and meta-analysis of population-level studies. *Age and ageing* 2021;50(1):96-104.

- 1
  - 2
  - 3
  - 4
  - 5
  - 6
  - 7
  - 8
  - 9
  - 10
  - 11
  - 12
  - 13
  - 14
  - 15
  - 16
  - 17
  - 18
  - 19
  - 20
  - 21
  - 22
  - 23
  - 24
  - 25
  - 26
  - 27
  - 28
  - 29
  - 30
  - 31
  - 32
  - 33
  - 34
  - 35
  - 36
  - 37
  - 38
  - 39
  - 40
  - 41
  - 42
  - 43
  - 44
  - 45
  - 46
  - 47
  - 48
  - 49
  - 50
  - 51
  - 52
  - 53
  - 54
  - 55
  - 56
  - 57
  - 58
  - 59
  - 60
5. Siriwardhana DD, Hardoon S, Rait G, et al. Prevalence of frailty and prefrailty among community-dwelling older adults in low-income and middle-income countries: a systematic review and meta-analysis. *BMJ open* 2018;8(3):e018195.
  6. Alvarado BE, Zunzunegui M-V, Béland F, et al. Life course social and health conditions linked to frailty in Latin American older men and women. *The Journals of Gerontology Series A: Biological Sciences and Medical Sciences* 2008;63(12):1399-406.
  7. Da Mata FAF, Pereira PPdS, Andrade KRCd, et al. Prevalence of frailty in Latin America and the Caribbean: a systematic review and meta-analysis. *PloS one* 2016;11(8):e0160019.
  8. Ofori-Asenso R, Chin KL, Mazidi M, et al. Global incidence of frailty and prefrailty among community-dwelling older adults: a systematic review and meta-analysis. *JAMA network open* 2019;2(8):e198398-e98.
  9. Harttgen K, Kowal P, Strulik H, et al. Patterns of frailty in older adults: comparing results from higher and lower income countries using the Survey of Health, Ageing and Retirement in Europe (SHARE) and the Study on Global AGEing and Adult Health (SAGE). *PloS one* 2013;8(10):e75847.
  10. Kshatri JS, Palo SK, Bhoi T, et al. Associations of multimorbidity on frailty and dependence among an elderly rural population: Findings from the AHSETS study. *Mechanisms of Ageing and Development* 2020;192:111384.
  11. Kendhapedi KK, Devasenapathy N. Prevalence and factors associated with frailty among community-dwelling older people in rural Thanjavur district of South India: a cross-sectional study. *BMJ open* 2019;9(10):e032904.
  12. Biritwum R, Minicuci N, Yawson A, et al. Prevalence of and factors associated with frailty and disability in older adults from China, Ghana, India, Mexico, Russia and South Africa. *Maturitas* 2016;91:8-18.
  13. Chaudhary M, Arokiasamy P. Patterns of frailty and quality of life among older adults: Comparative analysis using SAGE States of India. *Journal of Population Ageing* 2019;12(1):1-23.
  14. Dasgupta A, Bandyopadhyay S, Bandyopadhyay L, et al. How frail are our elderly? An assessment with Tilburg frailty indicator (TFI) in a rural elderly population of West Bengal. *Journal of family medicine and primary care* 2019;8(7):2242.
  15. Collard RM, Boter H, Schoevers RA, et al. Prevalence of frailty in community-dwelling older persons: a systematic review. *Journal of the american geriatrics society* 2012;60(8):1487-92.
  16. He B, Ma Y, Wang C, et al. Prevalence and risk factors for frailty among community-dwelling older people in China: a systematic review and meta-analysis. *The journal of nutrition, health & aging* 2019;23(5):442-50.
  17. Kojima G, Iliffe S, Taniguchi Y, et al. Prevalence of frailty in Japan: A systematic review and meta-analysis. *Journal of epidemiology* 2017;27(8):347-53.
  18. Conroy S, Maynou L. Frailty: time for a new approach to health care? *The Lancet Healthy Longevity* 2021;2(2):e60-e61.
  19. Blodgett JM, Rockwood K, Theou O. Changes in the severity and lethality of age-related health deficit accumulation in the USA between 1999 and 2018: a population-based cohort study. *The Lancet Healthy Longevity* 2021;2(2):e96-e104.
  20. Hanlon P, Nicholl BI, Jani BD, et al. Frailty and pre-frailty in middle-aged and older adults and its association with multimorbidity and mortality: a prospective analysis of 493 737 UK Biobank participants. *The Lancet Public Health* 2018;3(7):e323-e32.
  21. , 2018:e1262-e63.
  22. Gordon E, Peel N, Samanta M, et al. Sex differences in frailty: a systematic review and meta-analysis. *Experimental gerontology* 2017;89:30-40.
  23. Ahrenfeldt LJ, Möller S, Thinggaard M, et al. Sex differences in comorbidity and frailty in Europe. *International journal of public health* 2019;64(7):1025-36.
  24. Kane AE, Howlett SE. Sex differences in frailty: Comparisons between humans and preclinical models. *Mechanisms of Ageing and Development* 2021;198:111546.

- 1
- 2
- 3
- 4 25. Gordon E, Hubbard R. Physiological basis for sex differences in frailty. *Current opinion in physiology* 2018;6:10-15.
- 5
- 6 26. Gordon E, Hubbard R. Do sex differences in chronic disease underpin the sex-frailty paradox? *Mechanisms of ageing and development* 2019;179:44-50.
- 7
- 8 27. International Institute for Population Sciences (IIPS), National Programme for Health Care of Elderly (NPHCE), MoHFW, Harvard T. H. Chan School of Public Health (HSPH) and the University of Southern California (USC) 2020. Longitudinal Ageing Study in India (LASI) Wave 1, 2017-18, India Report, International Institute for Population Sciences, Mumbai.
- 9
- 10
- 11
- 12 28. Perianayagam A, Bloom D, Lee J, et al. Cohort profile: the longitudinal ageing study in India (LASI). *International Journal of Epidemiology* 2022;51(4):e167-e76.
- 13
- 14 29. [Dataset] International Institute for Population Sciences, Longitudinal Ageing Study in India (LASI), Wave – I, 2017-18 <https://www.iipsindia.ac.in/content/LASI-data>.
- 15
- 16 30. Rockwood K, Mitnitski A. Frailty in relation to the accumulation of deficits. *The Journals of Gerontology Series A: Biological Sciences and Medical Sciences* 2007;62(7):722-27.
- 17
- 18
- 19
- 20 31. Searle SD, Mitnitski A, Gahbauer EA, et al. A standard procedure for creating a frailty index. *BMC geriatrics* 2008;8(1):1-10.
- 21
- 22 32. Gordon E, Reid N, Khetani I, et al. How frail is frail? A systematic scoping review and synthesis of high impact studies. *BMC geriatrics* 2021;21(1):1-9.
- 23
- 24 33. Rockwood K, Andrew M, Mitnitski A. A comparison of two approaches to measuring frailty in elderly people. *The Journals of Gerontology Series A: Biological Sciences and Medical Sciences* 2007;62(7):738-43.
- 25
- 26
- 27 34. Song X, Mitnitski A, Rockwood K. Prevalence and 10-year outcomes of frailty in older adults in relation to deficit accumulation. *Journal of the American Geriatrics Society* 2010;58(4):681-87.
- 28
- 29
- 30 35. Rockwood K, Song X, Mitnitski A. Changes in relative fitness and frailty across the adult lifespan: evidence from the Canadian National Population Health Survey. *Cmaj* 2011;183(8):E487-E94.
- 31
- 32 36. Weir D, Langa K, Ryan L. Harmonized cognitive assessment protocol (HCAP): Study protocol summary. *Institute for Social Research, University of Michigan* 2016;10
- 33
- 34 37. Mullahy J. Specification and testing of some modified count data models. *Journal of econometrics* 1986;33(3):341-65.
- 35
- 36 38. Woodward M. Rationale and tutorial for analysing and reporting sex differences in cardiovascular associations. *Heart* 2019;105(22):1701-08.
- 37
- 38 39. R Core Team (2020). R: A language and environment for statistical computing. R Foundation for Statistical Computing, Vienna, Austria. URL <https://www.R-project.org/>. [program].
- 39
- 40
- 41 40. Zhu Y, Edwards D, Mant J, et al. Characteristics, service use and mortality of clusters of multimorbid patients in England: a population-based study. *BMC medicine* 2020;18:1-11.
- 42
- 43
- 44 41. Blodgett J, Theou O, Kirkland S, et al. Frailty in NHANES: comparing the frailty index and phenotype. *Archives of gerontology and geriatrics* 2015;60(3):464-70.
- 45
- 46 42. Kojima G, Iliffe S, Walters K. Smoking as a predictor of frailty: a systematic review. *BMC geriatrics* 2015;15(1):1-7.
- 47
- 48 43. Ortolá R, García-Esquinas E, León-Muñoz LM, et al. Patterns of alcohol consumption and risk of frailty in community-dwelling older adults. *Journals of Gerontology Series A: Biomedical Sciences and Medical Sciences* 2016;71(2):251-58.
- 49
- 50 44. Kojima G, Liljas A, Iliffe S, et al. A systematic review and meta-analysis of prospective associations between alcohol consumption and incident frailty. *Age and ageing* 2018;47(1):26-34.
- 51
- 52 45. Hanlon P, Blane DN, Macdonald S, et al. Our response to rising frailty in younger people must address prevention burden. *The Lancet Healthy Longevity* 2021;2(5):e245.
- 53
- 54
- 55
- 56
- 57
- 58
- 59
- 60

- 1
  - 2
  - 3
  - 4
  - 5
  - 6
  - 7
  - 8
  - 9
  - 10
  - 11
  - 12
  - 13
  - 14
  - 15
  - 16
  - 17
  - 18
  - 19
  - 20
  - 21
  - 22
  - 23
  - 24
  - 25
  - 26
  - 27
  - 28
  - 29
  - 30
  - 31
  - 32
  - 33
  - 34
  - 35
  - 36
  - 37
  - 38
  - 39
  - 40
  - 41
  - 42
  - 43
  - 44
  - 45
  - 46
  - 47
  - 48
  - 49
  - 50
  - 51
  - 52
  - 53
  - 54
  - 55
  - 56
  - 57
  - 58
  - 59
  - 60
46. Kojima G. Frailty as a predictor of hospitalisation among community-dwelling older people: a systematic review and meta-analysis. *J Epidemiol Community Health* 2016;70(7):722-29.
47. Mitnitski A, Fallah N, Rockwood M, et al. Transitions in cognitive status in relation to frailty in older adults: a comparison of three frailty measures. *The journal of nutrition, health & aging* 2011;15(10):863-67.
48. Segaux L, Broussier A, Oubaya N, et al. Several frailty parameters highly prevalent in middle age (50–65) are independent predictors of adverse events. *Scientific reports* 2021;11(1):1-10.
49. Lu Z, Er Y, Zhan Y, et al. Association of frailty status with risk of fall among middle-aged and older adults in China: a nationally representative cohort study. *The journal of nutrition, health & aging* 2021;25(8):985-92.
50. Blodgett JM, Theou O, Howlett SE, et al. A frailty index from common clinical and laboratory tests predicts increased risk of death across the life course. *Geroscience* 2017;39:447-55.
51. Kehler DS, Ferguson T, Stammers AN, et al. Prevalence of frailty in Canadians 18–79 years old in the Canadian Health Measures Survey. *BMC geriatrics* 2017;17(1):1-8.
52. Spiers GF, Kunonga TP, Hall A, et al. Measuring frailty in younger populations: a rapid review of evidence. *BMJ open* 2021;11(3):e047051.
53. Graubard BI, Korn EL. Regression analysis with clustered data. *Statistics in medicine* 1994;13(5-7):509-22.
54. Hanlon P, Jani BD, Butterly E, et al. An analysis of frailty and multimorbidity in 20,566 UK Biobank participants with type 2 diabetes. *Communications medicine* 2021;1(1):1-9.
55. Kanters DM, Griffith LE, Hogan DB, et al. Assessing the measurement properties of a Frailty Index across the age spectrum in the Canadian Longitudinal Study on Aging. *J Epidemiol Community Health* 2017;71(8):794-99.

1  
2  
3 **Fig 1. State-wise prevalence of frailty, by sex and age group.** Individuals with frailty  
4 index  $\geq 0.25$  are defined as 'frail'. Prevalence estimates are weighted, using state-level  
5 individual sampling weights provided in data.  
6  
7  
8  
9

10  
11  
12  
13 **Fig 2. Forest plot of adjusted odds ratios (95% CI) for frailty, by participants'**  
14 **background characteristics.** MPCE: monthly per capita expenditure, which is defined as  
15 total monthly household consumption expenditure divided by household size. Food  
16 constraint refers to household food unavailability in the past 12 months, where household  
17 members either reduced their meal size, did not eat even though they were hungry, or did  
18 not eat for a whole day because enough food was not available in the household.  
19  
20  
21  
22  
23  
24  
25  
26  
27  
28  
29  
30  
31  
32  
33  
34  
35  
36  
37  
38  
39  
40  
41  
42  
43  
44  
45  
46  
47  
48  
49  
50  
51  
52  
53  
54  
55  
56  
57  
58  
59  
60

# Female 45-59 years

# Male 45-59 years

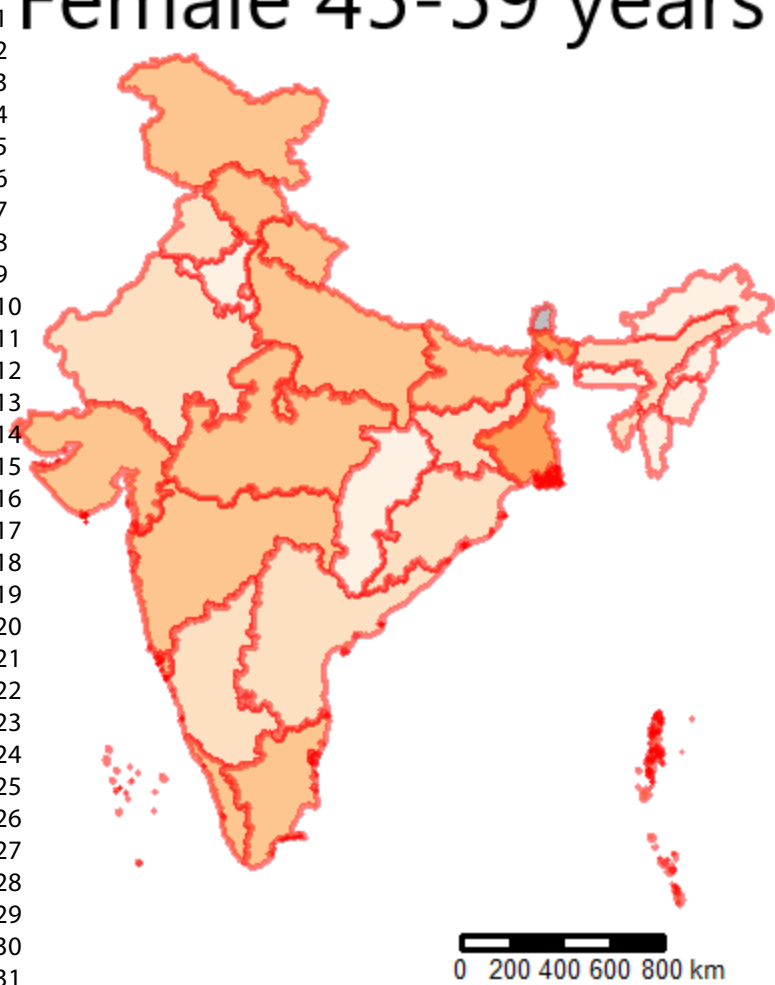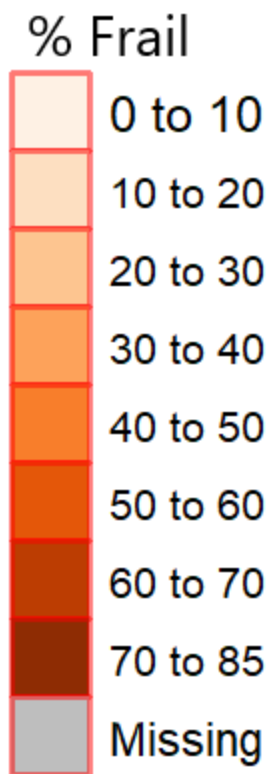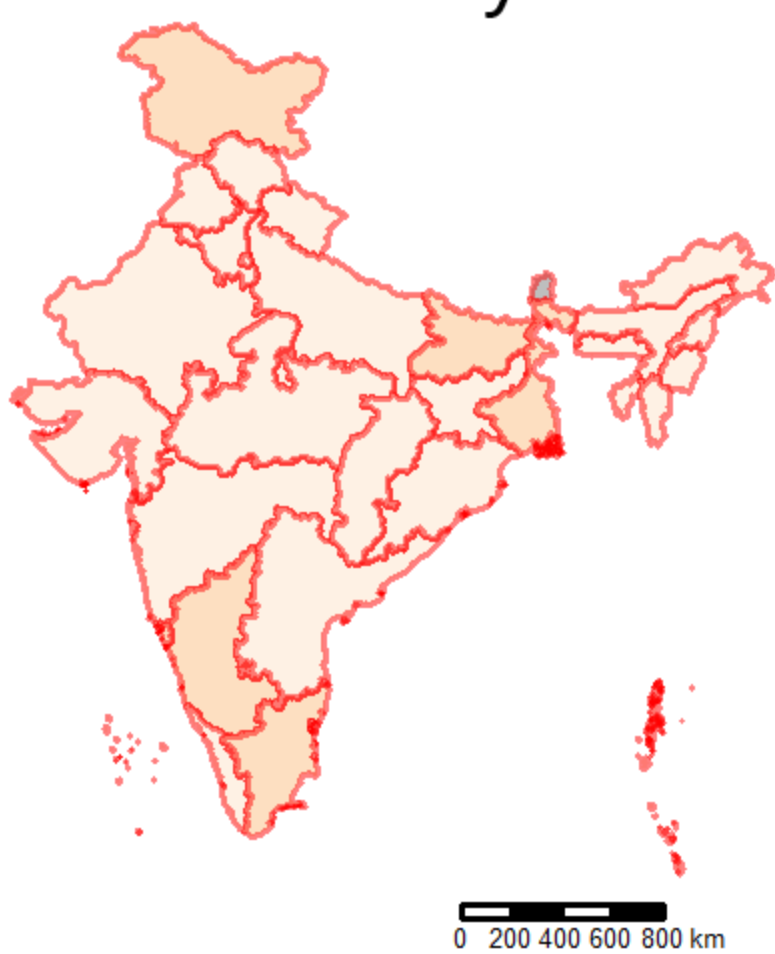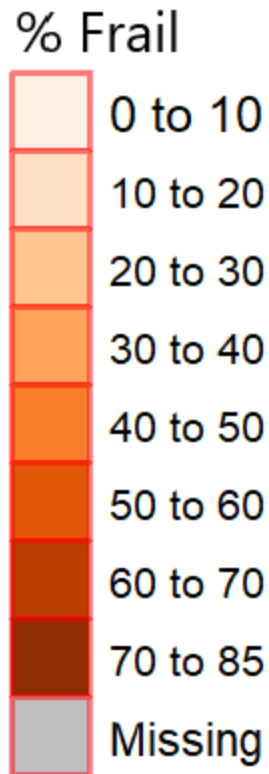

# Female 60-plus years

# Male 60-plus years

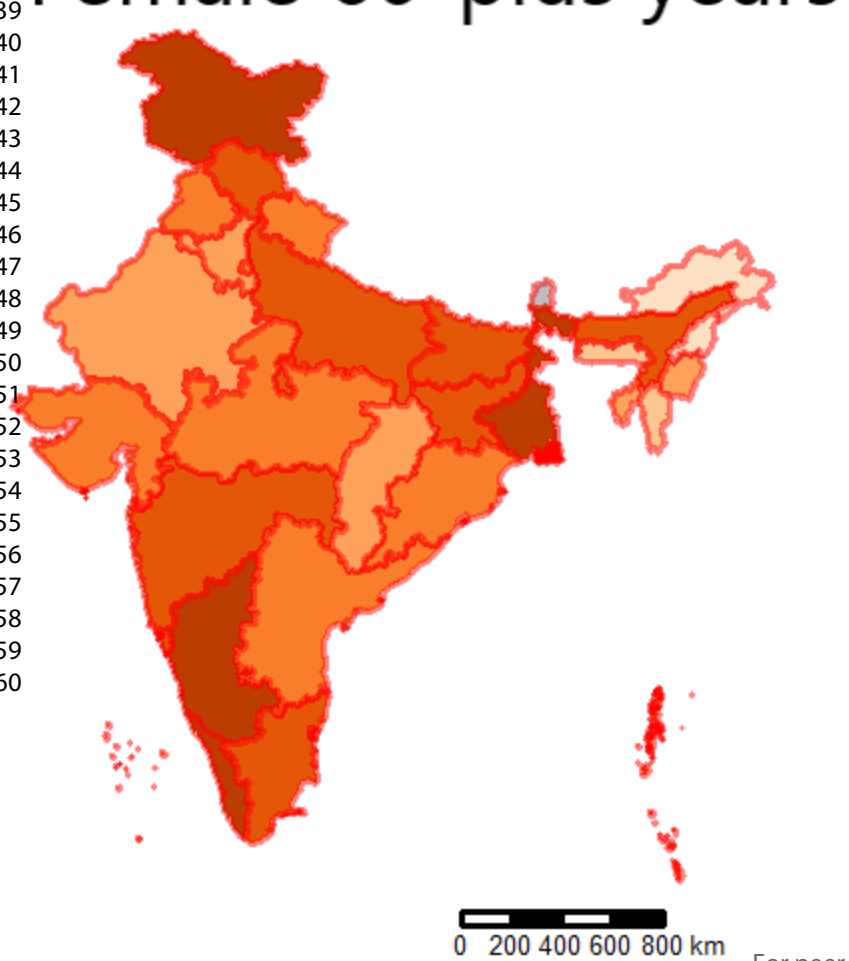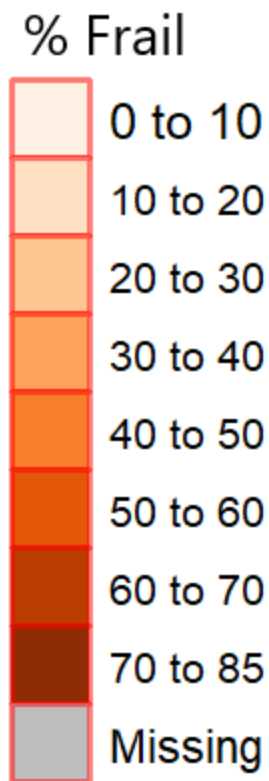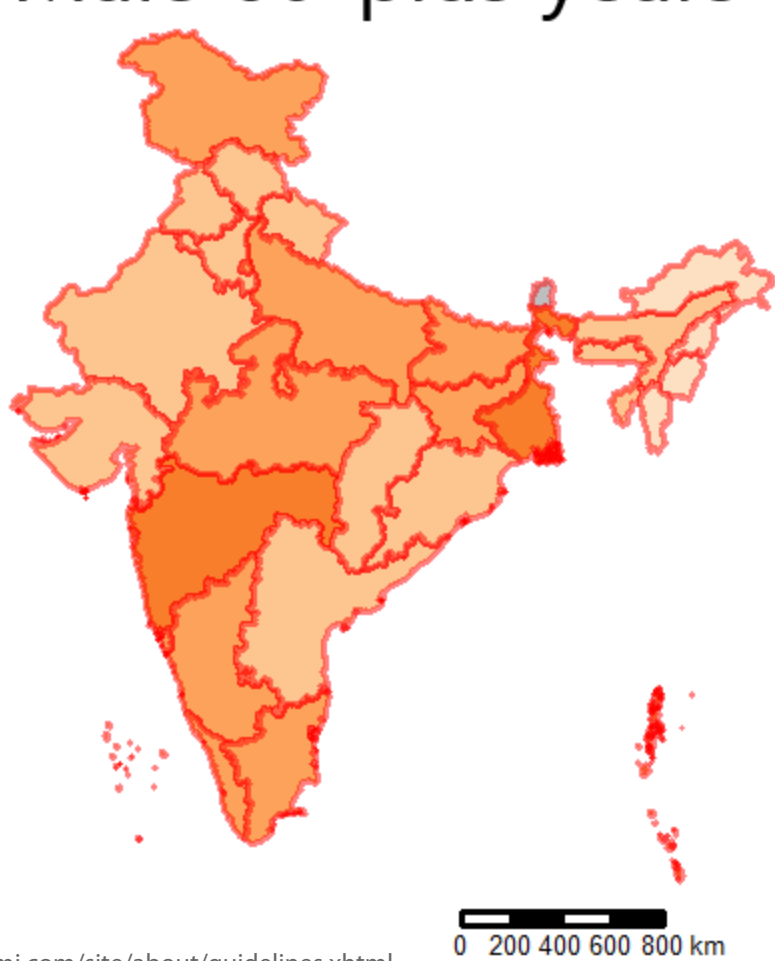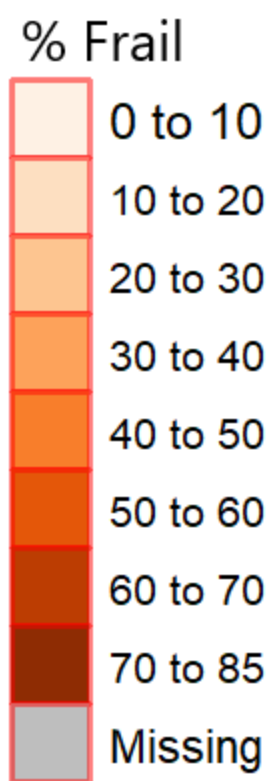

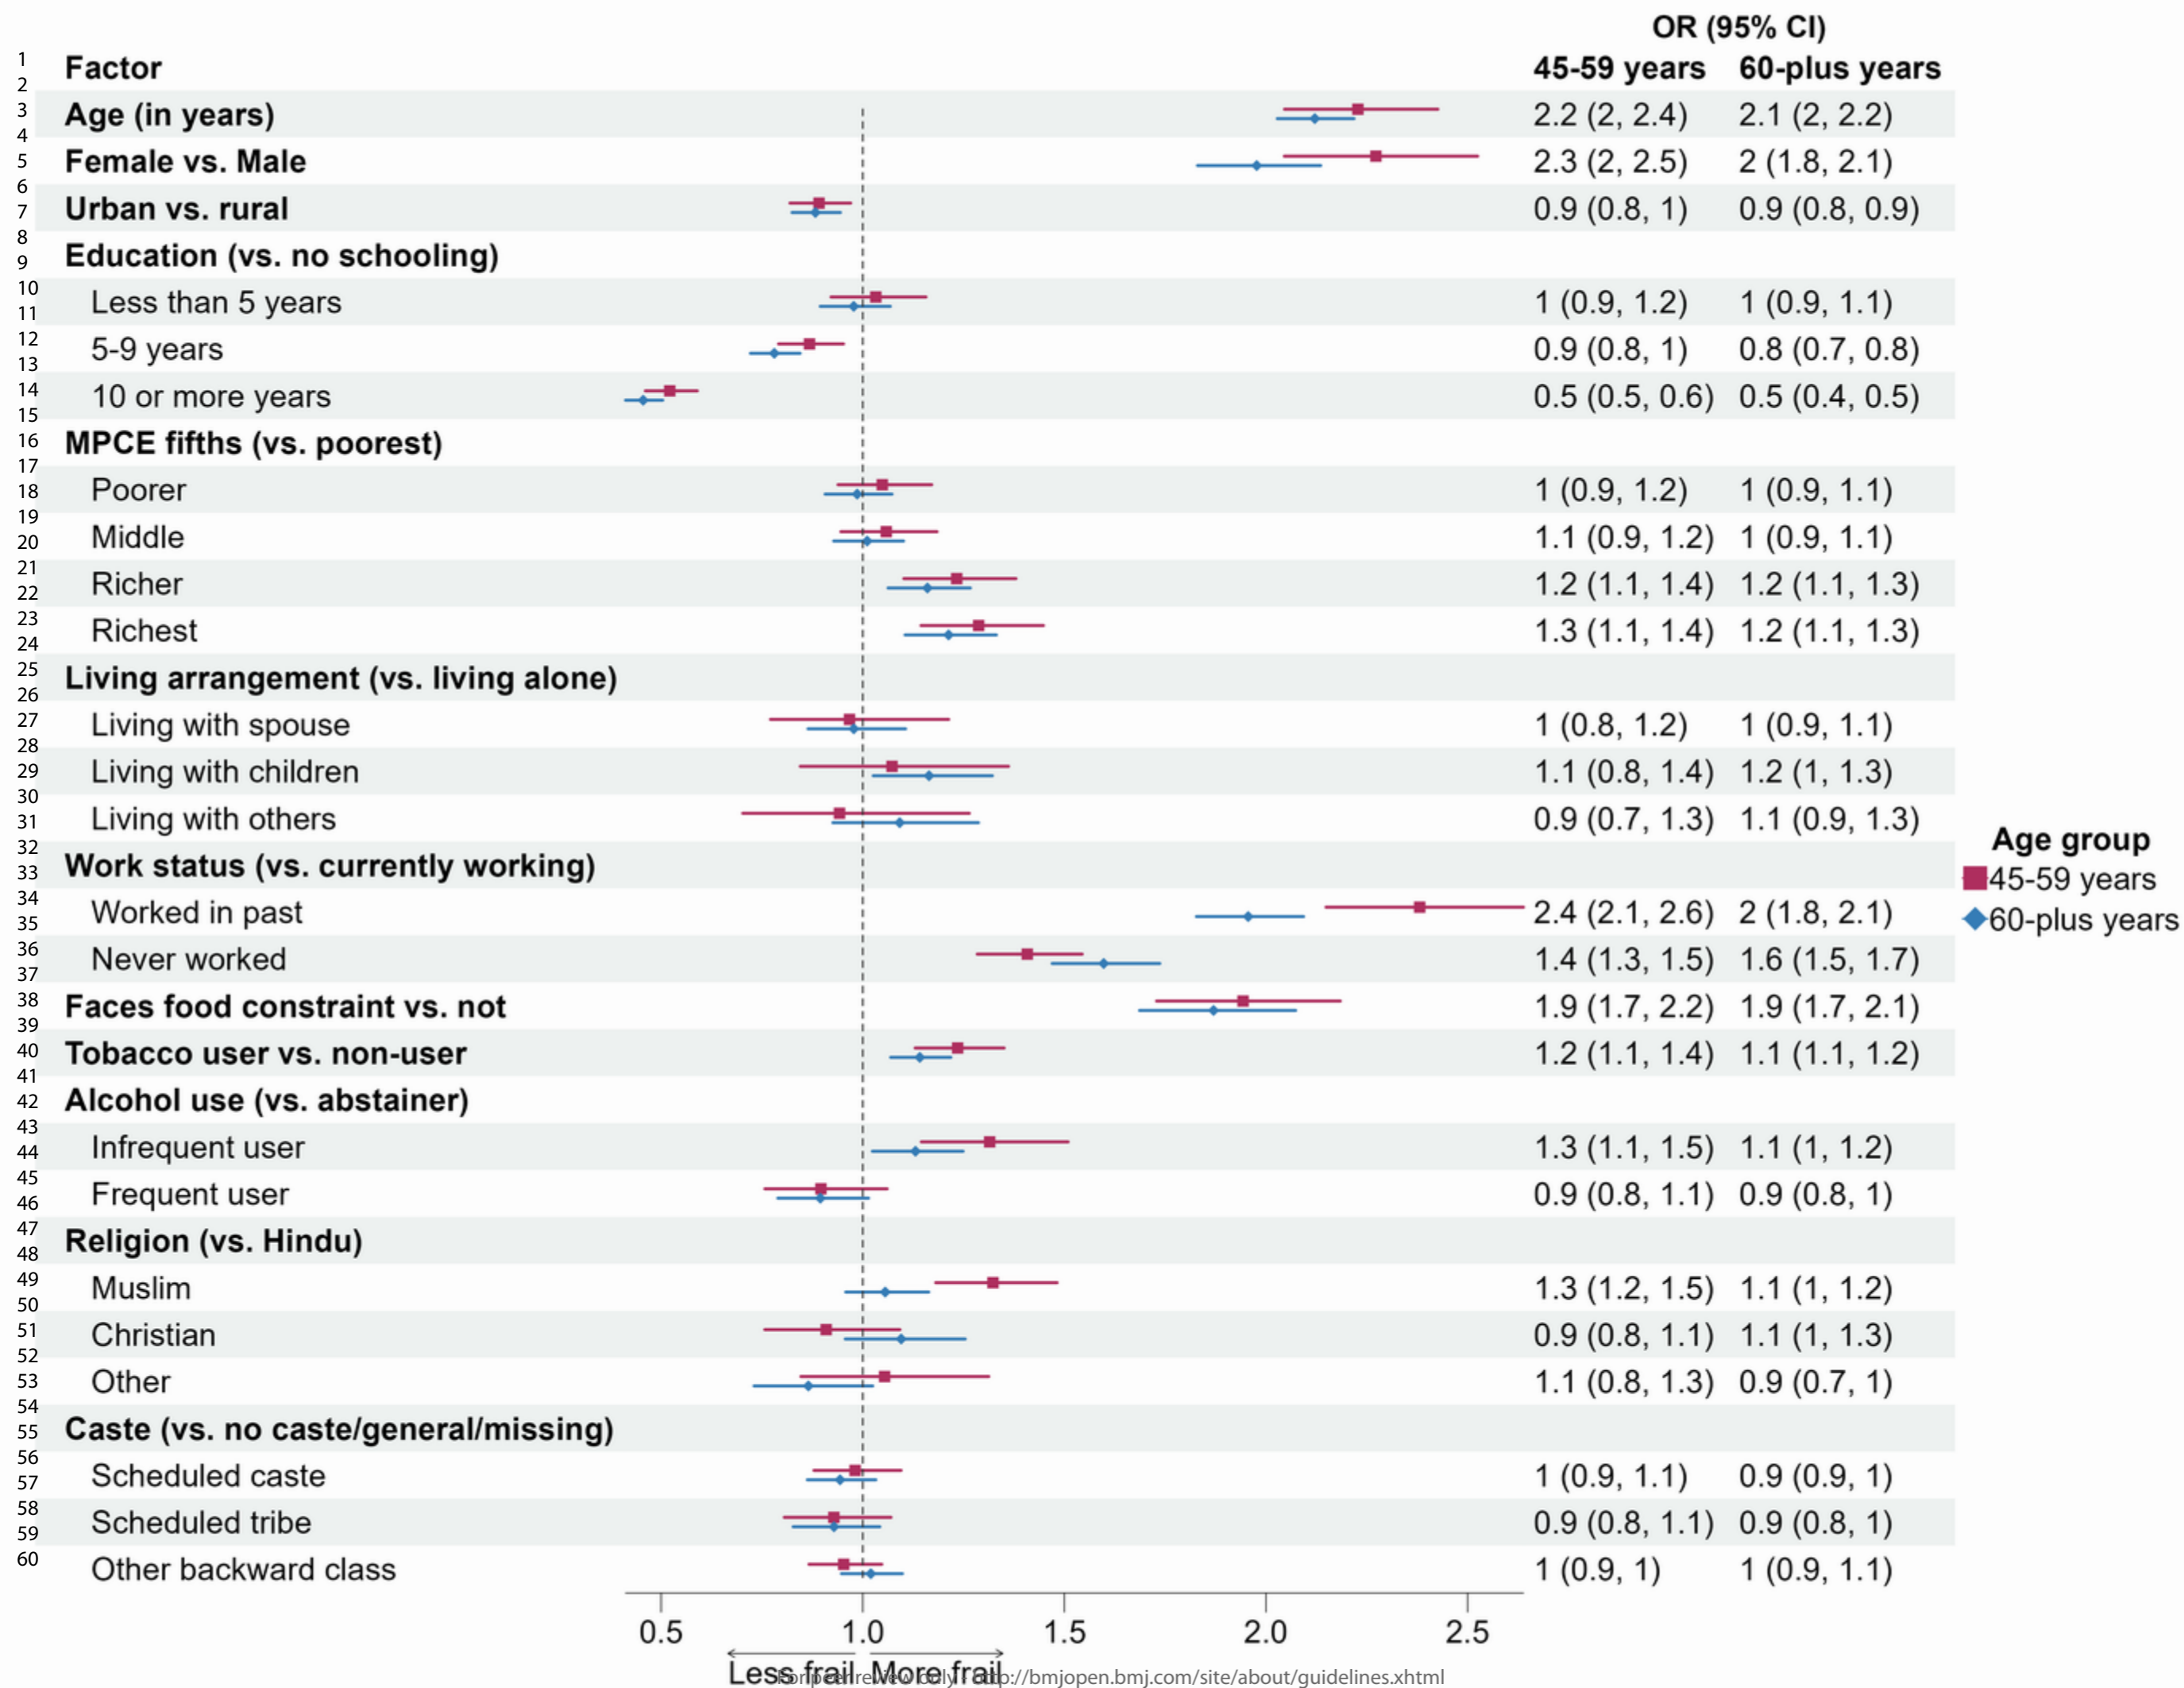

# Frailty among middle-aged and older women and men in India: Findings from Wave 1 of the Longitudinal Aging Study in India

## Supplementary Table & Figure legends

**S1 Table. Construction of deficits-based frailty index and distribution of deficit scores.**

**S2 Table. Definition of outcomes – hospitalization in last 12 months and any fall in past 2 years.**

**S3 Table. Construction of cognition score and distribution of its components.**

**S4 Table. Characteristics of excluded participants and participants included in various analyses.**

**S5 Table. Prevalence of frailty, overall and by participants' background characteristics.**

**S6 Table. Sex differences in distribution of frailty deficit scores.**

**S7 Table. Sex-specific associations between frailty and adverse outcomes.**

**S8 Table. Summary of different frailty measures, by sex and age groups.**

**S9 Table. Association between frailty (alternative definitions) and adverse outcomes.**

**S10 Table. Distribution of frailty deficit scores in middle-aged and older adults, frail and overall.**

**S1 Fig. Flowchart presenting selection of participants for analyses.**

**S2 Fig. Distribution of frailty index and cognition score among 45-plus participants. A)** Frailty index had a mean value of 0.18 and standard deviation (SD) of 0.13, with values ranging from 0-0.83 and a median (IQR) of 0.14 (0.08, 0.25). The dotted line presents the cut-off 0.25. **B)** Composite cognition score value ranges from 4 to 43, with a mean of 27.01 (SD=6.36) and a median of 27 (IQR = 22,32). Poor cognition is defined as cognition score  $\leq$  18 (10<sup>th</sup> percentile marked as dotted line in the graph).

**S3 Fig. Missingness in deficit scores.** Mobility1:Walking 100 yards; Mobility2:Sitting for 2 hours or more; Mobility3:Getting up from a chair after sitting for long period; Mobility4:Climbing one flight of stairs without resting ; Mobility5:Stooping, kneeling or crouching; Mobility6:Reaching or extending arms above shoulder level (either arm); Mobility7:Pulling or pushing large objects; Mobility8:Lifting or carrying weights over 5 kilos, like a heavy bag of groceries; Mobility9:Picking up a coin from a table; Activities of Daily Living (ADL) 1:Dressing, including putting on chappals, shoes, etc.; ADL2:Walking across a room; ADL3:Bathing; ADL4:Eating; ADL5:Getting in or out of bed; ADL6:Using the toilet, including getting up and down; ADL7:Preparing a hot meal (cooking and serving); ADL8:Shopping for groceries; ADL9:Making telephone calls; ADL10:Taking medications; ADL11:Doing work around the house or garden; ADL12:Managing money, such as paying



1  
2  
3 bills and keeping track of expenses; ADL13:Getting around or finding address in unfamiliar  
4 place.  
5

6 **S4 Fig. Prevalence of frailty across states, in middle-aged and elderly men and**  
7 **women.** Individuals with frailty index > 0.21 were considered as frail. Prevalence estimates  
8 are weighted, using state-level individual sampling weights provided in data.  
9

10 **S5 Fig. Forest plot of adjusted odds ratios (95% CI) for frailty, by participants'**  
11 **background characteristics, using income as the economic indicator.** Annual per capita  
12 household income is used as the economic indicator, instead of monthly per capita  
13 consumption expenditure. Per capita household income is computed by aggregating income  
14 from all sources (agricultural and non-agricultural business, wage/salary, pension and  
15 transfers) and dividing by the number of household members.  
16  
17  
18  
19  
20  
21  
22  
23  
24  
25  
26  
27  
28  
29  
30  
31  
32  
33  
34  
35  
36  
37  
38  
39  
40  
41  
42  
43  
44  
45  
46  
47  
48  
49  
50  
51  
52  
53  
54  
55  
56  
57  
58  
59  
60

**S1 Table. Construction of deficits-based frailty index and distribution of deficit scores.**

| Domain/variable                                                  | Coding criteria                                                     | Questions                                                                                                                                                                                                                                                                                                                                                              | Distribution in adults 45 years or older* (N=65562) |               |
|------------------------------------------------------------------|---------------------------------------------------------------------|------------------------------------------------------------------------------------------------------------------------------------------------------------------------------------------------------------------------------------------------------------------------------------------------------------------------------------------------------------------------|-----------------------------------------------------|---------------|
| <b>General Health (Self-reported health) (1 deficit)</b>         | Very good = 0, Good = 0.25, Fair = 0.50, Poor = 0.75, Very poor = 1 | 1. Now I want to ask you about your general health. Overall, how is your health in general? Would you say it is very good, good, fair, poor, or very poor?<br>1. Very good<br>2. Good<br>3. Fair<br>4. Poor<br>5. Very poor                                                                                                                                            | Value                                               | N (%)         |
|                                                                  |                                                                     |                                                                                                                                                                                                                                                                                                                                                                        | 0                                                   | 3050 (4.65)   |
|                                                                  |                                                                     |                                                                                                                                                                                                                                                                                                                                                                        | 0.25                                                | 23628 (36.04) |
|                                                                  |                                                                     |                                                                                                                                                                                                                                                                                                                                                                        | 0.5                                                 | 26924 (41.07) |
|                                                                  |                                                                     |                                                                                                                                                                                                                                                                                                                                                                        | 0.75                                                | 9811 (14.96)  |
|                                                                  |                                                                     |                                                                                                                                                                                                                                                                                                                                                                        | 1                                                   | 1242 (1.89)   |
|                                                                  |                                                                     |                                                                                                                                                                                                                                                                                                                                                                        | Missing                                             | 7 (1.38)      |
| <b>Self-reported medically diagnosed conditions (9 deficits)</b> |                                                                     |                                                                                                                                                                                                                                                                                                                                                                        |                                                     |               |
| (1) Arthritis                                                    | 1 if Yes to 1. and selected a. in 2.<br>0 otherwise                 | 1. Has any health professional ever diagnosed you with the following chronic conditions or diseases?<br>Arthritis or rheumatism, Osteoporosis or other bone/joint diseases.<br>1. Yes<br>2. No<br><br>2. Have you ever been diagnosed with the following bone/joint diseases/problems?<br>a. Arthritis<br>b. Rheumatism<br>c. Osteoporosis<br>d. Other, please specify | Value                                               | N (%)         |
|                                                                  |                                                                     |                                                                                                                                                                                                                                                                                                                                                                        | 0                                                   | 60065 (91.62) |
|                                                                  |                                                                     |                                                                                                                                                                                                                                                                                                                                                                        | 1                                                   | 5327 (8.13)   |
|                                                                  |                                                                     |                                                                                                                                                                                                                                                                                                                                                                        | Missing                                             | 170 (0.26)    |
| (2) Stroke                                                       | 1 if Yes to 1.<br>0 otherwise                                       | 1. Has any health professional ever diagnosed you with the following chronic conditions or diseases?<br>Stroke<br>1. Yes<br>2. No                                                                                                                                                                                                                                      | Value                                               | N (%)         |
|                                                                  |                                                                     |                                                                                                                                                                                                                                                                                                                                                                        | 0                                                   | 64195 (97.91) |
|                                                                  |                                                                     |                                                                                                                                                                                                                                                                                                                                                                        | 1                                                   | 1195 (1.82)   |
|                                                                  |                                                                     |                                                                                                                                                                                                                                                                                                                                                                        | Missing                                             | 172 (0.26)    |

1  
2  
3  
4  
5  
6  
7  
8  
9  
10  
11  
12  
13  
14  
15  
16  
17  
18  
19  
20  
21  
22  
23  
24  
25  
26  
27  
28  
29  
30  
31  
32  
33  
34  
35  
36  
37  
38  
39  
40  
41  
42  
43  
44  
45  
46

|            |                                                                                                                                                                                                                                                                                                                                                                                    |                                                                                                                                                                                                                                                                                                                                                                                                                                                                                                                                                                                                                                                                                                                                                                                                                                                                                                                                                                                                                                                        |         |               |
|------------|------------------------------------------------------------------------------------------------------------------------------------------------------------------------------------------------------------------------------------------------------------------------------------------------------------------------------------------------------------------------------------|--------------------------------------------------------------------------------------------------------------------------------------------------------------------------------------------------------------------------------------------------------------------------------------------------------------------------------------------------------------------------------------------------------------------------------------------------------------------------------------------------------------------------------------------------------------------------------------------------------------------------------------------------------------------------------------------------------------------------------------------------------------------------------------------------------------------------------------------------------------------------------------------------------------------------------------------------------------------------------------------------------------------------------------------------------|---------|---------------|
| (3) Angina | Angina is defined based on symptoms.                                                                                                                                                                                                                                                                                                                                               | <b>Rose angina questionnaire:</b> <sup>1</sup>                                                                                                                                                                                                                                                                                                                                                                                                                                                                                                                                                                                                                                                                                                                                                                                                                                                                                                                                                                                                         | Value   | N (%)         |
|            |                                                                                                                                                                                                                                                                                                                                                                                    |                                                                                                                                                                                                                                                                                                                                                                                                                                                                                                                                                                                                                                                                                                                                                                                                                                                                                                                                                                                                                                                        | 0       | 61336 (93.55) |
|            |                                                                                                                                                                                                                                                                                                                                                                                    |                                                                                                                                                                                                                                                                                                                                                                                                                                                                                                                                                                                                                                                                                                                                                                                                                                                                                                                                                                                                                                                        | 1       | 4005 (6.11)   |
|            |                                                                                                                                                                                                                                                                                                                                                                                    |                                                                                                                                                                                                                                                                                                                                                                                                                                                                                                                                                                                                                                                                                                                                                                                                                                                                                                                                                                                                                                                        | Missing | 221 (0.34)    |
|            | Individuals classified as having angina were those who had a history of chest pain (answer "Yes" to question 1), set off by physical exertion (answer "Yes" to questions 2 or 3), forcing them to stop or slow down (question 4), with subsequent relief ("Yes" to question 5), within 10 minutes (question 6), and located in the sternum or the left anterior chest and left arm | <ol style="list-style-type: none"> <li>Do you ever have any pain or discomfort in your chest? <ol style="list-style-type: none"> <li>Yes</li> <li>No</li> </ol> </li> <li>Do you get this pain or discomfort when you walk uphill or hurry? <ol style="list-style-type: none"> <li>Yes</li> <li>No</li> <li>Unable to walk</li> </ol> </li> <li>Do you get it when you walk at an ordinary pace on the level? <ol style="list-style-type: none"> <li>Yes</li> <li>No</li> </ol> </li> <li>When you get any pain or discomfort in your chest while walking or moving, what do you do? <ol style="list-style-type: none"> <li>Stop</li> <li>Slow down</li> <li>Continue at the same pace</li> </ol> </li> <li>Does it go away when you stop moving? <ol style="list-style-type: none"> <li>Yes</li> <li>No</li> </ol> </li> <li>How quickly the pain subsides when it occurs? <ol style="list-style-type: none"> <li>10 minutes or less</li> <li>More than 10 minutes</li> </ol> </li> <li>Where do you get this pain or discomfort? (figure)</li> </ol> |         |               |

|              | <p>(quadrants 4, 8, or 5 and 6 in question 7).<br/><br/>1 if Yes to above conditions specified.<br/>0 otherwise</p> | 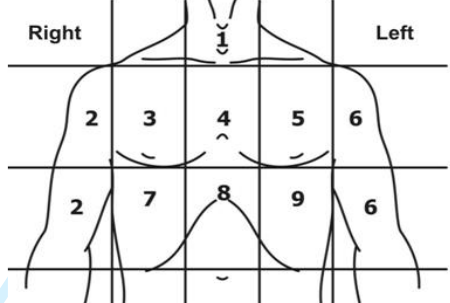                                                                                                                                                                                                                                                                                                                                                                      |                                                                                                                                                                                                                                                 |       |       |   |               |   |              |         |            |  |
|--------------|---------------------------------------------------------------------------------------------------------------------|---------------------------------------------------------------------------------------------------------------------------------------------------------------------------------------------------------------------------------------------------------------------------------------------------------------------------------------------------------------------------------------------------------------------------------------------------------|-------------------------------------------------------------------------------------------------------------------------------------------------------------------------------------------------------------------------------------------------|-------|-------|---|---------------|---|--------------|---------|------------|--|
| (4) Diabetes | <p>1 if Yes to 1.<br/>0 otherwise</p>                                                                               | <p>1. Has any health professional ever diagnosed you with the following chronic conditions or diseases?<br/>Diabetes<br/>1. Yes<br/>2. No</p>                                                                                                                                                                                                                                                                                                           | <table border="1"> <thead> <tr> <th>Value</th> <th>N (%)</th> </tr> </thead> <tbody> <tr> <td>0</td> <td>56952 (86.87)</td> </tr> <tr> <td>1</td> <td>8429 (12.86)</td> </tr> <tr> <td>Missing</td> <td>181 (0.28)</td> </tr> </tbody> </table> | Value | N (%) | 0 | 56952 (86.87) | 1 | 8429 (12.86) | Missing | 181 (0.28) |  |
| Value        | N (%)                                                                                                               |                                                                                                                                                                                                                                                                                                                                                                                                                                                         |                                                                                                                                                                                                                                                 |       |       |   |               |   |              |         |            |  |
| 0            | 56952 (86.87)                                                                                                       |                                                                                                                                                                                                                                                                                                                                                                                                                                                         |                                                                                                                                                                                                                                                 |       |       |   |               |   |              |         |            |  |
| 1            | 8429 (12.86)                                                                                                        |                                                                                                                                                                                                                                                                                                                                                                                                                                                         |                                                                                                                                                                                                                                                 |       |       |   |               |   |              |         |            |  |
| Missing      | 181 (0.28)                                                                                                          |                                                                                                                                                                                                                                                                                                                                                                                                                                                         |                                                                                                                                                                                                                                                 |       |       |   |               |   |              |         |            |  |
| (5) COPD     | <p>1 if Yes to 1. and selected a. in 2.<br/>0 otherwise</p>                                                         | <p>1. Has any health professional ever diagnosed you with the following chronic conditions or diseases?<br/>Chronic lung disease such as asthma, chronic obstructive pulmonary disease/Chronic bronchitis or other chronic lung problems.<br/>1. Yes<br/>2. No<br/><br/>2. Which type of chronic lung disease do you have?<br/>a. Chronic obstructive pulmonary disease (COPD)<br/>b. Chronic Bronchitis<br/>c. Asthma<br/>d. Other, please specify</p> | <table border="1"> <thead> <tr> <th>Value</th> <th>N (%)</th> </tr> </thead> <tbody> <tr> <td>0</td> <td>64667 (98.63)</td> </tr> <tr> <td>1</td> <td>724 (1.10)</td> </tr> <tr> <td>Missing</td> <td>171 (0.26)</td> </tr> </tbody> </table>   | Value | N (%) | 0 | 64667 (98.63) | 1 | 724 (1.10)   | Missing | 171 (0.26) |  |
| Value        | N (%)                                                                                                               |                                                                                                                                                                                                                                                                                                                                                                                                                                                         |                                                                                                                                                                                                                                                 |       |       |   |               |   |              |         |            |  |
| 0            | 64667 (98.63)                                                                                                       |                                                                                                                                                                                                                                                                                                                                                                                                                                                         |                                                                                                                                                                                                                                                 |       |       |   |               |   |              |         |            |  |
| 1            | 724 (1.10)                                                                                                          |                                                                                                                                                                                                                                                                                                                                                                                                                                                         |                                                                                                                                                                                                                                                 |       |       |   |               |   |              |         |            |  |
| Missing      | 171 (0.26)                                                                                                          |                                                                                                                                                                                                                                                                                                                                                                                                                                                         |                                                                                                                                                                                                                                                 |       |       |   |               |   |              |         |            |  |
| (6) Asthma   | <p>1 if Yes to 1. and selected c. in 2.<br/>0 otherwise</p>                                                         | <p>1. Has any health professional ever diagnosed you with the following chronic conditions or diseases?<br/>Chronic lung disease such as asthma, chronic obstructive pulmonary disease/Chronic bronchitis or other chronic lung problems.<br/>1. Yes<br/>2. No<br/><br/>2. Which type of chronic lung disease do you have?</p>                                                                                                                          | <table border="1"> <thead> <tr> <th>Value</th> <th>N (%)</th> </tr> </thead> <tbody> <tr> <td>0</td> <td>62830 (95.83)</td> </tr> <tr> <td>1</td> <td>2561 (3.91)</td> </tr> <tr> <td>Missing</td> <td>171 (0.26)</td> </tr> </tbody> </table>  | Value | N (%) | 0 | 62830 (95.83) | 1 | 2561 (3.91)  | Missing | 171 (0.26) |  |
| Value        | N (%)                                                                                                               |                                                                                                                                                                                                                                                                                                                                                                                                                                                         |                                                                                                                                                                                                                                                 |       |       |   |               |   |              |         |            |  |
| 0            | 62830 (95.83)                                                                                                       |                                                                                                                                                                                                                                                                                                                                                                                                                                                         |                                                                                                                                                                                                                                                 |       |       |   |               |   |              |         |            |  |
| 1            | 2561 (3.91)                                                                                                         |                                                                                                                                                                                                                                                                                                                                                                                                                                                         |                                                                                                                                                                                                                                                 |       |       |   |               |   |              |         |            |  |
| Missing      | 171 (0.26)                                                                                                          |                                                                                                                                                                                                                                                                                                                                                                                                                                                         |                                                                                                                                                                                                                                                 |       |       |   |               |   |              |         |            |  |

1  
2  
3  
4  
5  
6  
7  
8  
9  
10  
11  
12  
13  
14  
15  
16  
17  
18  
19  
20  
21  
22  
23  
24  
25  
26  
27  
28  
29  
30  
31  
32  
33  
34  
35  
36  
37  
38  
39  
40  
41  
42  
43  
44  
45  
46

|                |                                                                                                                                                                                                                                                                                                                                                                                           | <p>a. Chronic obstructive pulmonary disease (COPD)</p> <p>b. Chronic Bronchitis</p> <p>c. Asthma</p> <p>d. Other, please specify</p>                                                                                                                                                                                                                                                                                                                                                                                                                                                                                                                                                                                                                                                                                                                                                                                                                                                  |                                                                                                                                                                                                                                                 |       |       |   |               |   |             |         |             |
|----------------|-------------------------------------------------------------------------------------------------------------------------------------------------------------------------------------------------------------------------------------------------------------------------------------------------------------------------------------------------------------------------------------------|---------------------------------------------------------------------------------------------------------------------------------------------------------------------------------------------------------------------------------------------------------------------------------------------------------------------------------------------------------------------------------------------------------------------------------------------------------------------------------------------------------------------------------------------------------------------------------------------------------------------------------------------------------------------------------------------------------------------------------------------------------------------------------------------------------------------------------------------------------------------------------------------------------------------------------------------------------------------------------------|-------------------------------------------------------------------------------------------------------------------------------------------------------------------------------------------------------------------------------------------------|-------|-------|---|---------------|---|-------------|---------|-------------|
| (7) Depression | <p>Depression is defined based on symptoms using CIDI scale.</p> <p>a) Calculated appetite status:<br/>1 if Yes to either 6. or 7.<br/>0 otherwise</p> <p>b) Calculated CIDI score:<br/>1 is summation of 4, 5, appetite status, 8, 9, 10, 11</p> <p>c) Finally, depression status:<br/>1 if 1. is Yes &amp; selected either 1. or 2. category from 2. &amp; selected either 1. or 2.</p> | <p>1. During the last 12 months, was there ever a time when you felt sad, blue, or depressed for two weeks or more in a row?</p> <p>1. Yes<br/>2. No</p> <p>2. Please think of the two-week period during the last 12 months when these feelings were worst. During that time did the feelings of being sad, blue, or depressed usually last all day long, most of the day, about half the day, or less than half the day?</p> <p>1. All day long<br/>2. Most of the day<br/>3. About half the day<br/>4. Less than half the day</p> <p>3. During those two weeks, did you feel this way every day, almost every day, or less often than that?</p> <p>1. Every day<br/>2. Almost every day<br/>3. Less often</p> <p>Thinking about those same two weeks,</p> <p>4. Did you lose interest in most things?</p> <p>1. Yes<br/>2. No</p> <p>5. Did you ever feel more tired out or low in energy than is usual for you?</p> <p>1. Yes<br/>2. No</p> <p>6. Did you lose your appetite?</p> | <table border="1"> <thead> <tr> <th>Value</th> <th>N (%)</th> </tr> </thead> <tbody> <tr> <td>0</td> <td>60228 (91.86)</td> </tr> <tr> <td>1</td> <td>4058 (6.19)</td> </tr> <tr> <td>Missing</td> <td>1276 (1.95)</td> </tr> </tbody> </table> | Value | N (%) | 0 | 60228 (91.86) | 1 | 4058 (6.19) | Missing | 1276 (1.95) |
| Value          | N (%)                                                                                                                                                                                                                                                                                                                                                                                     |                                                                                                                                                                                                                                                                                                                                                                                                                                                                                                                                                                                                                                                                                                                                                                                                                                                                                                                                                                                       |                                                                                                                                                                                                                                                 |       |       |   |               |   |             |         |             |
| 0              | 60228 (91.86)                                                                                                                                                                                                                                                                                                                                                                             |                                                                                                                                                                                                                                                                                                                                                                                                                                                                                                                                                                                                                                                                                                                                                                                                                                                                                                                                                                                       |                                                                                                                                                                                                                                                 |       |       |   |               |   |             |         |             |
| 1              | 4058 (6.19)                                                                                                                                                                                                                                                                                                                                                                               |                                                                                                                                                                                                                                                                                                                                                                                                                                                                                                                                                                                                                                                                                                                                                                                                                                                                                                                                                                                       |                                                                                                                                                                                                                                                 |       |       |   |               |   |             |         |             |
| Missing        | 1276 (1.95)                                                                                                                                                                                                                                                                                                                                                                               |                                                                                                                                                                                                                                                                                                                                                                                                                                                                                                                                                                                                                                                                                                                                                                                                                                                                                                                                                                                       |                                                                                                                                                                                                                                                 |       |       |   |               |   |             |         |             |

|                  | <p>category from 3. &amp; CIDI score is <math>\geq 3</math>. 0 otherwise</p>                                                                                              | <p>1. Yes<br/>2. No</p> <p>7. Did your appetite increase during those same two weeks?<br/>1. Yes<br/>2. No</p> <p>8. During the same two-week period did you have a lot more trouble concentrating than usual?<br/>1. Yes<br/>2. No</p> <p>9. People sometimes feel down on themselves, and no good or worthless. During that two-week period, did you feel this way?<br/>1. Yes<br/>2. No</p> <p>10. Did you think a lot about death – either your own, someone else’s, or death in general – during those two weeks?<br/>1. Yes<br/>2. No</p> <p>11. Did you have more trouble falling asleep than you usually do during those two weeks?<br/>1. Yes<br/>2. No</p> |                                                                                                                                                                                                                                                  |       |       |   |               |   |               |         |            |
|------------------|---------------------------------------------------------------------------------------------------------------------------------------------------------------------------|----------------------------------------------------------------------------------------------------------------------------------------------------------------------------------------------------------------------------------------------------------------------------------------------------------------------------------------------------------------------------------------------------------------------------------------------------------------------------------------------------------------------------------------------------------------------------------------------------------------------------------------------------------------------|--------------------------------------------------------------------------------------------------------------------------------------------------------------------------------------------------------------------------------------------------|-------|-------|---|---------------|---|---------------|---------|------------|
| (8) Hypertension | <p>Hypertension is defined as either self-reported or BP <math>\geq 140/90</math></p> <p>1 if Yes to 1. or 2. is <math>\geq 140</math> or 3. is <math>\geq 90</math>,</p> | <p>1. Has any health professional ever diagnosed you with the following chronic conditions or diseases?<br/>Hypertension or high blood pressure.<br/>1. Yes<br/>2. No</p> <p>When the device is in the correct position and the R is relaxed, press the button to Start. Measure blood pressure and pulse three times with one minute gap between each of the measurements. No need to</p>                                                                                                                                                                                                                                                                           | <table border="1"> <thead> <tr> <th>Value</th> <th>N (%)</th> </tr> </thead> <tbody> <tr> <td>0</td> <td>34246 (52.23)</td> </tr> <tr> <td>1</td> <td>31143 (47.50)</td> </tr> <tr> <td>Missing</td> <td>173 (0.26)</td> </tr> </tbody> </table> | Value | N (%) | 0 | 34246 (52.23) | 1 | 31143 (47.50) | Missing | 173 (0.26) |
| Value            | N (%)                                                                                                                                                                     |                                                                                                                                                                                                                                                                                                                                                                                                                                                                                                                                                                                                                                                                      |                                                                                                                                                                                                                                                  |       |       |   |               |   |               |         |            |
| 0                | 34246 (52.23)                                                                                                                                                             |                                                                                                                                                                                                                                                                                                                                                                                                                                                                                                                                                                                                                                                                      |                                                                                                                                                                                                                                                  |       |       |   |               |   |               |         |            |
| 1                | 31143 (47.50)                                                                                                                                                             |                                                                                                                                                                                                                                                                                                                                                                                                                                                                                                                                                                                                                                                                      |                                                                                                                                                                                                                                                  |       |       |   |               |   |               |         |            |
| Missing          | 173 (0.26)                                                                                                                                                                |                                                                                                                                                                                                                                                                                                                                                                                                                                                                                                                                                                                                                                                                      |                                                                                                                                                                                                                                                  |       |       |   |               |   |               |         |            |

1  
2  
3  
4  
5  
6  
7  
8  
9  
10  
11  
12  
13  
14  
15  
16  
17  
18  
19  
20  
21  
22  
23  
24  
25  
26  
27  
28  
29  
30  
31  
32  
33  
34  
35  
36  
37  
38  
39  
40  
41  
42  
43  
44  
45  
46

1  
2  
3  
4  
5  
6  
7  
8  
9  
10  
11  
12  
13  
14  
15  
16  
17  
18  
19  
20  
21  
22  
23  
24  
25  
26  
27  
28  
29  
30  
31  
32  
33  
34  
35  
36  
37  
38  
39  
40  
41  
42  
43  
44  
45  
46

|                                        | 0 otherwise                                             | <p>remove the cuffs and the device between the measurements. Record measurements in CAPI. Enter 993 in systolic, diastolic and pulse reading if an unresolvable equipment problem occurs. If the average systolic reading obtained is greater than 180 and average diastolic reading is greater than 110 or either of it, fill the referral letter and give to respondent and stop the test immediately.</p> <p>2. Systolic readings: average of last two readings.<br/>3. Diastolic readings: average of last two readings.</p> |                                                                                                                                                                                                                                                  |       |       |   |               |   |               |         |            |
|----------------------------------------|---------------------------------------------------------|----------------------------------------------------------------------------------------------------------------------------------------------------------------------------------------------------------------------------------------------------------------------------------------------------------------------------------------------------------------------------------------------------------------------------------------------------------------------------------------------------------------------------------|--------------------------------------------------------------------------------------------------------------------------------------------------------------------------------------------------------------------------------------------------|-------|-------|---|---------------|---|---------------|---------|------------|
| (9) Cataract                           | 1 if Yes to 1. and selected b. in 2.<br>0 otherwise     | <p>1. Now I have some questions about your eyesight. Have you ever been diagnosed with any eye or vision problem or condition, including ordinary near sightedness or farsightedness?<br/>1. Yes<br/>2. No</p> <p>2. With which problem or condition were you diagnosed?<br/>a. Presbyopia<br/>b. Cataract<br/>c. Glaucoma<br/>d. Myopia (Nearsightedness)<br/>e. Hypermetropia (Farsightedness)<br/>f. Other, please specify</p>                                                                                                | <table border="1"> <thead> <tr> <th>Value</th> <th>N (%)</th> </tr> </thead> <tbody> <tr> <td>0</td> <td>57291 (87.38)</td> </tr> <tr> <td>1</td> <td>8088 (12.34)</td> </tr> <tr> <td>Missing</td> <td>183 (0.28)</td> </tr> </tbody> </table>  | Value | N (%) | 0 | 57291 (87.38) | 1 | 8088 (12.34)  | Missing | 183 (0.28) |
| Value                                  | N (%)                                                   |                                                                                                                                                                                                                                                                                                                                                                                                                                                                                                                                  |                                                                                                                                                                                                                                                  |       |       |   |               |   |               |         |            |
| 0                                      | 57291 (87.38)                                           |                                                                                                                                                                                                                                                                                                                                                                                                                                                                                                                                  |                                                                                                                                                                                                                                                  |       |       |   |               |   |               |         |            |
| 1                                      | 8088 (12.34)                                            |                                                                                                                                                                                                                                                                                                                                                                                                                                                                                                                                  |                                                                                                                                                                                                                                                  |       |       |   |               |   |               |         |            |
| Missing                                | 183 (0.28)                                              |                                                                                                                                                                                                                                                                                                                                                                                                                                                                                                                                  |                                                                                                                                                                                                                                                  |       |       |   |               |   |               |         |            |
| <b>Medical symptoms (4 deficits)</b>   |                                                         |                                                                                                                                                                                                                                                                                                                                                                                                                                                                                                                                  |                                                                                                                                                                                                                                                  |       |       |   |               |   |               |         |            |
| 1) Bodily aches or pains did you have? | 1 if Yes to 1. & Either a., b., c. in 2.<br>0 otherwise | <p>1. Are you often troubled with pain?<br/>1. Yes<br/>2. No</p> <p>2. Do you take any medication or therapy to get relief from the pain [Multiple answers are allowed]?<br/>a. Yes, analgesics (Oral/ Injectable)</p>                                                                                                                                                                                                                                                                                                           | <table border="1"> <thead> <tr> <th>Value</th> <th>N (%)</th> </tr> </thead> <tbody> <tr> <td>0</td> <td>48290 (73.66)</td> </tr> <tr> <td>1</td> <td>17042 (25.99)</td> </tr> <tr> <td>Missing</td> <td>230 (0.35)</td> </tr> </tbody> </table> | Value | N (%) | 0 | 48290 (73.66) | 1 | 17042 (25.99) | Missing | 230 (0.35) |
| Value                                  | N (%)                                                   |                                                                                                                                                                                                                                                                                                                                                                                                                                                                                                                                  |                                                                                                                                                                                                                                                  |       |       |   |               |   |               |         |            |
| 0                                      | 48290 (73.66)                                           |                                                                                                                                                                                                                                                                                                                                                                                                                                                                                                                                  |                                                                                                                                                                                                                                                  |       |       |   |               |   |               |         |            |
| 1                                      | 17042 (25.99)                                           |                                                                                                                                                                                                                                                                                                                                                                                                                                                                                                                                  |                                                                                                                                                                                                                                                  |       |       |   |               |   |               |         |            |
| Missing                                | 230 (0.35)                                              |                                                                                                                                                                                                                                                                                                                                                                                                                                                                                                                                  |                                                                                                                                                                                                                                                  |       |       |   |               |   |               |         |            |

|                                                                          |                                                                                                                                   | <p>b. Yes, therapy(ies)</p> <p>c. Local/external application (Ointment, cream, gel, balm, spray, oil, etc.)</p> <p>d. None</p>                                                                                                                                                                                                                                                                                                                                                                                                                                                                                                                                                                                                                                                      |                                                                                                                                                                                                                                                                                                                                                                                           |       |       |   |               |      |               |         |               |      |              |   |            |         |            |
|--------------------------------------------------------------------------|-----------------------------------------------------------------------------------------------------------------------------------|-------------------------------------------------------------------------------------------------------------------------------------------------------------------------------------------------------------------------------------------------------------------------------------------------------------------------------------------------------------------------------------------------------------------------------------------------------------------------------------------------------------------------------------------------------------------------------------------------------------------------------------------------------------------------------------------------------------------------------------------------------------------------------------|-------------------------------------------------------------------------------------------------------------------------------------------------------------------------------------------------------------------------------------------------------------------------------------------------------------------------------------------------------------------------------------------|-------|-------|---|---------------|------|---------------|---------|---------------|------|--------------|---|------------|---------|------------|
| 2) Problem did you have with sleeping?                                   | <p>1 if responded 4. Frequently (5 or more nights per week), for answering any of the 4 questions listed.</p> <p>0 otherwise.</p> | <p>Now I would like to ask you a few questions about your sleep during the past 1 month.</p> <p>How often do you...? Would you say Never, Rarely (1-2 nights per week), Occasionally (3-4 nights per week), or Frequently (5 or more nights per week)?</p> <p>1. Never</p> <p>2. Rarely (1-2 nights per week)</p> <p>3. Occasionally (3-4 nights per week)</p> <p>4. Frequently (5 or more nights per week)</p> <p>1. How often do you have trouble falling asleep?</p> <p>2. How often did you wake up during the night and had trouble getting back to sleep?</p> <p>3. How often did you wake up too early in the morning and were not being able to fall asleep again?</p> <p>4. How often did you feel unrested during the day, no matter how many hours of sleep you had?</p> | <table border="1"> <thead> <tr> <th>Value</th> <th>N (%)</th> </tr> </thead> <tbody> <tr> <td>0</td> <td>57554 (87.79)</td> </tr> <tr> <td>1</td> <td>7786 (11.88)</td> </tr> <tr> <td>Missing</td> <td>222 (0.34)</td> </tr> </tbody> </table>                                                                                                                                           | Value | N (%) | 0 | 57554 (87.79) | 1    | 7786 (11.88)  | Missing | 222 (0.34)    |      |              |   |            |         |            |
| Value                                                                    | N (%)                                                                                                                             |                                                                                                                                                                                                                                                                                                                                                                                                                                                                                                                                                                                                                                                                                                                                                                                     |                                                                                                                                                                                                                                                                                                                                                                                           |       |       |   |               |      |               |         |               |      |              |   |            |         |            |
| 0                                                                        | 57554 (87.79)                                                                                                                     |                                                                                                                                                                                                                                                                                                                                                                                                                                                                                                                                                                                                                                                                                                                                                                                     |                                                                                                                                                                                                                                                                                                                                                                                           |       |       |   |               |      |               |         |               |      |              |   |            |         |            |
| 1                                                                        | 7786 (11.88)                                                                                                                      |                                                                                                                                                                                                                                                                                                                                                                                                                                                                                                                                                                                                                                                                                                                                                                                     |                                                                                                                                                                                                                                                                                                                                                                                           |       |       |   |               |      |               |         |               |      |              |   |            |         |            |
| Missing                                                                  | 222 (0.34)                                                                                                                        |                                                                                                                                                                                                                                                                                                                                                                                                                                                                                                                                                                                                                                                                                                                                                                                     |                                                                                                                                                                                                                                                                                                                                                                                           |       |       |   |               |      |               |         |               |      |              |   |            |         |            |
| 3) Difficulty did you have in seeing (person or object) across the road? | <p>Very good = 0, Good = 0.25, Fair = 0.50, Poor = 0.75, Very poor = 1</p>                                                        | <p>1. How good is your eyesight for seeing things at a distance, like recognizing a person across the street (or 20 meters away) whether or not you wear glasses, contacts, or corrective lenses?</p> <p>1. Very good</p> <p>2. Good</p> <p>3. Fair</p> <p>4. Poor</p> <p>5. Very poor</p>                                                                                                                                                                                                                                                                                                                                                                                                                                                                                          | <table border="1"> <thead> <tr> <th>Value</th> <th>N (%)</th> </tr> </thead> <tbody> <tr> <td>0</td> <td>4142 (6.32)</td> </tr> <tr> <td>0.25</td> <td>25786 (39.33)</td> </tr> <tr> <td>0.5</td> <td>25991 (39.64)</td> </tr> <tr> <td>0.75</td> <td>8472 (12.92)</td> </tr> <tr> <td>1</td> <td>966 (1.47)</td> </tr> <tr> <td>Missing</td> <td>205 (0.31)</td> </tr> </tbody> </table> | Value | N (%) | 0 | 4142 (6.32)   | 0.25 | 25786 (39.33) | 0.5     | 25991 (39.64) | 0.75 | 8472 (12.92) | 1 | 966 (1.47) | Missing | 205 (0.31) |
| Value                                                                    | N (%)                                                                                                                             |                                                                                                                                                                                                                                                                                                                                                                                                                                                                                                                                                                                                                                                                                                                                                                                     |                                                                                                                                                                                                                                                                                                                                                                                           |       |       |   |               |      |               |         |               |      |              |   |            |         |            |
| 0                                                                        | 4142 (6.32)                                                                                                                       |                                                                                                                                                                                                                                                                                                                                                                                                                                                                                                                                                                                                                                                                                                                                                                                     |                                                                                                                                                                                                                                                                                                                                                                                           |       |       |   |               |      |               |         |               |      |              |   |            |         |            |
| 0.25                                                                     | 25786 (39.33)                                                                                                                     |                                                                                                                                                                                                                                                                                                                                                                                                                                                                                                                                                                                                                                                                                                                                                                                     |                                                                                                                                                                                                                                                                                                                                                                                           |       |       |   |               |      |               |         |               |      |              |   |            |         |            |
| 0.5                                                                      | 25991 (39.64)                                                                                                                     |                                                                                                                                                                                                                                                                                                                                                                                                                                                                                                                                                                                                                                                                                                                                                                                     |                                                                                                                                                                                                                                                                                                                                                                                           |       |       |   |               |      |               |         |               |      |              |   |            |         |            |
| 0.75                                                                     | 8472 (12.92)                                                                                                                      |                                                                                                                                                                                                                                                                                                                                                                                                                                                                                                                                                                                                                                                                                                                                                                                     |                                                                                                                                                                                                                                                                                                                                                                                           |       |       |   |               |      |               |         |               |      |              |   |            |         |            |
| 1                                                                        | 966 (1.47)                                                                                                                        |                                                                                                                                                                                                                                                                                                                                                                                                                                                                                                                                                                                                                                                                                                                                                                                     |                                                                                                                                                                                                                                                                                                                                                                                           |       |       |   |               |      |               |         |               |      |              |   |            |         |            |
| Missing                                                                  | 205 (0.31)                                                                                                                        |                                                                                                                                                                                                                                                                                                                                                                                                                                                                                                                                                                                                                                                                                                                                                                                     |                                                                                                                                                                                                                                                                                                                                                                                           |       |       |   |               |      |               |         |               |      |              |   |            |         |            |
| 4) Difficulty did you have in seeing                                     | <p>Very good = 0, Good = 0.25,</p>                                                                                                | <p>1. How good is your eyesight for seeing things up close, like reading ordinary newspaper print whether or not you wear glasses, contacts, or corrective lenses</p> <p>1. Very good</p>                                                                                                                                                                                                                                                                                                                                                                                                                                                                                                                                                                                           | <table border="1"> <thead> <tr> <th>Value</th> <th>N (%)</th> </tr> </thead> <tbody> <tr> <td>0</td> <td>3262 (4.98)</td> </tr> <tr> <td>0.25</td> <td>22743 (34.69)</td> </tr> <tr> <td>0.5</td> <td>28024 (42.74)</td> </tr> </tbody> </table>                                                                                                                                          | Value | N (%) | 0 | 3262 (4.98)   | 0.25 | 22743 (34.69) | 0.5     | 28024 (42.74) |      |              |   |            |         |            |
| Value                                                                    | N (%)                                                                                                                             |                                                                                                                                                                                                                                                                                                                                                                                                                                                                                                                                                                                                                                                                                                                                                                                     |                                                                                                                                                                                                                                                                                                                                                                                           |       |       |   |               |      |               |         |               |      |              |   |            |         |            |
| 0                                                                        | 3262 (4.98)                                                                                                                       |                                                                                                                                                                                                                                                                                                                                                                                                                                                                                                                                                                                                                                                                                                                                                                                     |                                                                                                                                                                                                                                                                                                                                                                                           |       |       |   |               |      |               |         |               |      |              |   |            |         |            |
| 0.25                                                                     | 22743 (34.69)                                                                                                                     |                                                                                                                                                                                                                                                                                                                                                                                                                                                                                                                                                                                                                                                                                                                                                                                     |                                                                                                                                                                                                                                                                                                                                                                                           |       |       |   |               |      |               |         |               |      |              |   |            |         |            |
| 0.5                                                                      | 28024 (42.74)                                                                                                                     |                                                                                                                                                                                                                                                                                                                                                                                                                                                                                                                                                                                                                                                                                                                                                                                     |                                                                                                                                                                                                                                                                                                                                                                                           |       |       |   |               |      |               |         |               |      |              |   |            |         |            |



|                                                          |                                               |                                                                                                                                                                                            |         |               |
|----------------------------------------------------------|-----------------------------------------------|--------------------------------------------------------------------------------------------------------------------------------------------------------------------------------------------|---------|---------------|
| an object at arm's length?                               | Fair = 0.50,<br>Poor = 0.75,<br>Very poor = 1 | 2. Good<br>3. Fair<br>4. Poor<br>5. Very poor                                                                                                                                              | 0.75    | 10198 (15.55) |
|                                                          |                                               |                                                                                                                                                                                            | 1       | 1072 (1.64)   |
|                                                          |                                               |                                                                                                                                                                                            | Missing | 263 (0.4)     |
| <b>Functional assessment (9 deficits)</b>                | 1 = Yes,<br>0 = No                            | 1. Because of physical or health problems, do you have difficulty doing any of the activities? Exclude any difficulties that you expect to last less than three months.<br>1. Yes<br>2. No |         |               |
| 1) Walking 100 yards                                     |                                               |                                                                                                                                                                                            | Value   | N (%)         |
|                                                          |                                               |                                                                                                                                                                                            | 0       | 50503 (77.03) |
|                                                          |                                               |                                                                                                                                                                                            | 1       | 14782 (22.55) |
|                                                          |                                               |                                                                                                                                                                                            | Missing | 277 (0.42)    |
| 2) Sitting for 2 hours or more                           |                                               |                                                                                                                                                                                            | Value   | N (%)         |
|                                                          |                                               |                                                                                                                                                                                            | 0       | 46098 (70.31) |
|                                                          |                                               |                                                                                                                                                                                            | 1       | 19187 (29.27) |
|                                                          |                                               |                                                                                                                                                                                            | Missing | 277 (0.42)    |
| 3) Getting up from a chair after sitting for long period |                                               |                                                                                                                                                                                            | Value   | N (%)         |
|                                                          |                                               |                                                                                                                                                                                            | 0       | 44358 (67.66) |
|                                                          |                                               |                                                                                                                                                                                            | 1       | 20927 (31.92) |
|                                                          |                                               |                                                                                                                                                                                            | Missing | 277 (0.42)    |
| 4) Climbing one flight of stairs without resting         |                                               |                                                                                                                                                                                            | Value   | N (%)         |
|                                                          |                                               |                                                                                                                                                                                            | 0       | 37857 (57.74) |
|                                                          |                                               |                                                                                                                                                                                            | 1       | 27428 (41.84) |
|                                                          |                                               |                                                                                                                                                                                            | Missing | 277 (0.42)    |
| 5) Stooping, kneeling or crouching                       |                                               |                                                                                                                                                                                            | Value   | N (%)         |
|                                                          |                                               |                                                                                                                                                                                            | 0       | 36375 (55.48) |
|                                                          |                                               |                                                                                                                                                                                            | 1       | 28910 (44.10) |
|                                                          |                                               |                                                                                                                                                                                            | Missing | 277 (0.42)    |
| 6) Reaching or extending arms                            |                                               |                                                                                                                                                                                            | Value   | N (%)         |
|                                                          |                                               |                                                                                                                                                                                            | 0       | 56168 (85.67) |
|                                                          |                                               |                                                                                                                                                                                            | 1       | 9117 (13.91)  |

|                                                                            |                    |                                                                                                                                                                                                                                                                                                                                                        |         |               |
|----------------------------------------------------------------------------|--------------------|--------------------------------------------------------------------------------------------------------------------------------------------------------------------------------------------------------------------------------------------------------------------------------------------------------------------------------------------------------|---------|---------------|
| above shoulder level (either arm)                                          |                    |                                                                                                                                                                                                                                                                                                                                                        | Missing | 277 (0.42)    |
| 7) Pulling or pushing large objects                                        |                    |                                                                                                                                                                                                                                                                                                                                                        | Value   | N (%)         |
|                                                                            |                    |                                                                                                                                                                                                                                                                                                                                                        | 0       | 40486 (61.75) |
|                                                                            |                    |                                                                                                                                                                                                                                                                                                                                                        | 1       | 24798 (37.82) |
|                                                                            |                    |                                                                                                                                                                                                                                                                                                                                                        | Missing | 278 (0.42)    |
| 8) Lifting or carrying weights over 5 kilos, like a heavy bag of groceries |                    |                                                                                                                                                                                                                                                                                                                                                        | Value   | N (%)         |
|                                                                            |                    |                                                                                                                                                                                                                                                                                                                                                        | 0       | 48469 (73.93) |
|                                                                            |                    |                                                                                                                                                                                                                                                                                                                                                        | 1       | 16815 (25.65) |
|                                                                            |                    |                                                                                                                                                                                                                                                                                                                                                        | Missing | 278 (0.42)    |
| 9) Picking up a coin from a table                                          |                    |                                                                                                                                                                                                                                                                                                                                                        | Value   | N (%)         |
|                                                                            |                    |                                                                                                                                                                                                                                                                                                                                                        | 0       | 61255 (93.43) |
|                                                                            |                    |                                                                                                                                                                                                                                                                                                                                                        | 1       | 4029 (6.15)   |
|                                                                            |                    |                                                                                                                                                                                                                                                                                                                                                        | Missing | 278 (0.42)    |
| <b>ADL/IADL<sup>†</sup> limitations (13 deficits)</b>                      | 1 = Yes,<br>0 = No | Now, I will ask you about a few everyday activities. Please tell me if you have any difficulty with these because of a physical, mental, emotional, or memory problem. Please exclude any difficulties you expect to last less than three months.<br><br>Because of a health or memory problem, do you have any difficulty with...?<br>1. Yes<br>2. No |         |               |
| 1) Dressing, including putting on chappals, shoes, etc.                    |                    |                                                                                                                                                                                                                                                                                                                                                        | Value   | N (%)         |
|                                                                            |                    |                                                                                                                                                                                                                                                                                                                                                        | 0       | 62376 (95.14) |
|                                                                            |                    |                                                                                                                                                                                                                                                                                                                                                        | 1       | 2905 (4.43)   |
|                                                                            |                    |                                                                                                                                                                                                                                                                                                                                                        | Missing | 281 (0.43)    |
| 2) Walking across a room                                                   |                    |                                                                                                                                                                                                                                                                                                                                                        | Value   | N (%)         |
|                                                                            |                    |                                                                                                                                                                                                                                                                                                                                                        | 0       | 62466 (95.28) |
|                                                                            |                    |                                                                                                                                                                                                                                                                                                                                                        | 1       | 2815 (4.29)   |

1  
2  
3  
4  
5  
6  
7  
8  
9  
10  
11  
12  
13  
14  
15  
16  
17  
18  
19  
20  
21  
22  
23  
24  
25  
26  
27  
28  
29  
30  
31  
32  
33  
34  
35  
36  
37  
38  
39  
40  
41  
42  
43  
44  
45  
46

For peer review only

|                                                    |  |  |         |               |
|----------------------------------------------------|--|--|---------|---------------|
|                                                    |  |  | Missing | 281 (0.43)    |
| 3) Bathing                                         |  |  | Value   | N (%)         |
|                                                    |  |  | 0       | 62462 (95.27) |
|                                                    |  |  | 1       | 2819 (4.30)   |
|                                                    |  |  | Missing | 281 (0.43)    |
| 4) Eating                                          |  |  | Value   | N (%)         |
|                                                    |  |  | 0       | 62336 (95.08) |
|                                                    |  |  | 1       | 2945 (4.49)   |
|                                                    |  |  | Missing | 281 (0.43)    |
| 5) Getting in or out of bed                        |  |  | Value   | N (%)         |
|                                                    |  |  | 0       | 60712 (92.60) |
|                                                    |  |  | 1       | 4569 (6.97)   |
|                                                    |  |  | Missing | 281 (0.43)    |
| 6) Using the toilet, including getting up and down |  |  | Value   | N (%)         |
|                                                    |  |  | 0       | 58531 (89.28) |
|                                                    |  |  | 1       | 6750 (10.30)  |
|                                                    |  |  | Missing | 281 (0.43)    |
| 7) Preparing a hot meal (cooking and serving)      |  |  | Value   | N (%)         |
|                                                    |  |  | 0       | 58627 (89.42) |
|                                                    |  |  | 1       | 6654 (10.15)  |
|                                                    |  |  | Missing | 281 (0.43)    |
| 8) Shopping for groceries                          |  |  | Value   | N (%)         |
|                                                    |  |  | 0       | 56411 (86.04) |
|                                                    |  |  | 1       | 8865 (13.52)  |
|                                                    |  |  | Missing | 286 (0.44)    |
| 9) Making telephone calls                          |  |  | Value   | N (%)         |
|                                                    |  |  | 0       | 53181 (81.12) |
|                                                    |  |  | 1       | 12043 (18.37) |
|                                                    |  |  | Missing | 338 (0.52)    |
| 10) Taking medications                             |  |  | Value   | N (%)         |
|                                                    |  |  | 0       | 59283 (90.42) |
|                                                    |  |  | 1       | 5998 (9.15)   |

|                                                                                         |                                                                              |                                                                                                                                                                                                                                                                                                                                                                                                    |         |               |
|-----------------------------------------------------------------------------------------|------------------------------------------------------------------------------|----------------------------------------------------------------------------------------------------------------------------------------------------------------------------------------------------------------------------------------------------------------------------------------------------------------------------------------------------------------------------------------------------|---------|---------------|
|                                                                                         |                                                                              |                                                                                                                                                                                                                                                                                                                                                                                                    | Missing | 281 (0.43)    |
| 11) Doing work around the house or garden                                               |                                                                              |                                                                                                                                                                                                                                                                                                                                                                                                    | Value   | N (%)         |
|                                                                                         |                                                                              |                                                                                                                                                                                                                                                                                                                                                                                                    | 0       | 55490 (84.64) |
|                                                                                         |                                                                              |                                                                                                                                                                                                                                                                                                                                                                                                    | 1       | 9791 (14.93)  |
|                                                                                         |                                                                              |                                                                                                                                                                                                                                                                                                                                                                                                    | Missing | 281 (0.43)    |
| 12) Managing money, such as paying bills and keeping track of expenses                  |                                                                              |                                                                                                                                                                                                                                                                                                                                                                                                    | Value   | N (%)         |
|                                                                                         |                                                                              |                                                                                                                                                                                                                                                                                                                                                                                                    | 0       | 54799 (83.58) |
|                                                                                         |                                                                              |                                                                                                                                                                                                                                                                                                                                                                                                    | 1       | 10482 (15.99) |
|                                                                                         |                                                                              |                                                                                                                                                                                                                                                                                                                                                                                                    | Missing | 281 (0.43)    |
| 13) Getting around or finding address in unfamiliar place                               |                                                                              |                                                                                                                                                                                                                                                                                                                                                                                                    | Value   | N (%)         |
|                                                                                         |                                                                              |                                                                                                                                                                                                                                                                                                                                                                                                    | 0       | 53400 (81.45) |
|                                                                                         |                                                                              |                                                                                                                                                                                                                                                                                                                                                                                                    | 1       | 11881 (18.12) |
|                                                                                         |                                                                              |                                                                                                                                                                                                                                                                                                                                                                                                    | Missing | 281 (0.43)    |
| <b>Any form of mental impairment (1) (Proxy variable used for mental health status)</b> | 1 if Yes to 1. & Selected b. in 2.<br>0 otherwise                            | 1. Do you have any form of physical or mental impairment?<br>1. Yes<br>2. No<br><br>2. Which form of impairment do you have?<br>a. Physical impairment such as lower body or upper body<br>b. Mental impairment such as intellectual, cognition, or learning impairment<br>c. Hearing impairment<br>d. Visual impairment<br>e. Speech impairment such as speech production, language comprehension | Value   | N (%)         |
|                                                                                         |                                                                              |                                                                                                                                                                                                                                                                                                                                                                                                    | 0       | 64046 (97.69) |
|                                                                                         |                                                                              |                                                                                                                                                                                                                                                                                                                                                                                                    | 1       | 1222 (1.86)   |
|                                                                                         |                                                                              |                                                                                                                                                                                                                                                                                                                                                                                                    | Missing | 294 (0.45)    |
| <b>Body mass index (BMI) (1 deficit)</b>                                                | BMI $\geq$ 18.5 - <25 = 0 (Normal)<br>BMI $\geq$ 25 - <30 = 0.5 (Overweight) | BMI is weight in kilograms divided by height in meters squared.                                                                                                                                                                                                                                                                                                                                    | Value   | N (%)         |
|                                                                                         |                                                                              |                                                                                                                                                                                                                                                                                                                                                                                                    | 0       | 30872 (47.09) |
|                                                                                         |                                                                              |                                                                                                                                                                                                                                                                                                                                                                                                    | 0.5     | 12852 (19.60) |
|                                                                                         |                                                                              |                                                                                                                                                                                                                                                                                                                                                                                                    | 1       | 15349 (23.41) |
|                                                                                         |                                                                              |                                                                                                                                                                                                                                                                                                                                                                                                    | Missing | 6489 (9.90)   |

1  
2  
3  
4  
5  
6  
7  
8  
9  
10  
11  
12  
13  
14  
15  
16  
17  
18  
19  
20  
21  
22  
23  
24  
25  
26  
27  
28  
29  
30  
31  
32  
33  
34  
35  
36  
37  
38  
39  
40  
41  
42  
43  
44  
45  
46

|                                  |                                                                                                                                                                                                                                                                                                                              |                                                                                                                                                                                                                  |         |               |
|----------------------------------|------------------------------------------------------------------------------------------------------------------------------------------------------------------------------------------------------------------------------------------------------------------------------------------------------------------------------|------------------------------------------------------------------------------------------------------------------------------------------------------------------------------------------------------------------|---------|---------------|
|                                  | BMI < 18.5 =<br>1<br>(Underweight)<br>BMI >= 30 =<br>1 (Obese)                                                                                                                                                                                                                                                               |                                                                                                                                                                                                                  |         |               |
| <b>Grip strength (1 deficit)</b> | Grip (in kg),<br>(Left+Right hand)/2<br><br>Men:<br>(0<BMI<=24 and grip<=29)<br>or<br>(24<BMI<=26 and grip <=30) or<br>(26<BMI<=28 and grip<=30)<br>or<br>(28<BMI<=40 and grip<=32)<br>= 1 (Weak grip)<br><br>Women:<br>(0<BMI<=23 and grip<=17)<br>or<br>(23<BMI<=26 and grip <=17.3) or<br>(26<BMI<=29 and grip<=18)<br>or | The LASI measured grip strength in kilograms using a handheld dynamometer (Smedley's Hand Dynamometer). Health investigators collected two readings of grip strength for both hands (dominant and non-dominant). | Value   | N (%)         |
|                                  |                                                                                                                                                                                                                                                                                                                              |                                                                                                                                                                                                                  | 0       | 23368 (35.64) |
|                                  |                                                                                                                                                                                                                                                                                                                              |                                                                                                                                                                                                                  | 1       | 35313 (53.86) |
|                                  |                                                                                                                                                                                                                                                                                                                              |                                                                                                                                                                                                                  | Missing | 6881 (10.50)  |

|                                                                                                                                                                       | (29<BMI<=40 and grip<=21) = 1 (Weak grip)<br><br>1 = weak grip if fulfilled above specified conditions, 0 otherwise |                                                                                                                                                   |                                                                                                                                                                                                                                                  |       |       |   |               |   |               |         |              |
|-----------------------------------------------------------------------------------------------------------------------------------------------------------------------|---------------------------------------------------------------------------------------------------------------------|---------------------------------------------------------------------------------------------------------------------------------------------------|--------------------------------------------------------------------------------------------------------------------------------------------------------------------------------------------------------------------------------------------------|-------|-------|---|---------------|---|---------------|---------|--------------|
| <b>Timed walk (gait speed) (1 deficit)</b>                                                                                                                            | Gait speed = 1 if timed walk > 10 (Slow)<br>Gait speed = 0 if timed walk <=10 (Normal)                              | LASI, respondents were asked to walk 4 metres twice. The time taken to walk was recorded in seconds. Each time, and the mean time was calculated. | <table border="1"> <thead> <tr> <th>Value</th> <th>N (%)</th> </tr> </thead> <tbody> <tr> <td>0</td> <td>57032 (86.99)</td> </tr> <tr> <td>1</td> <td>1289 (1.97)</td> </tr> <tr> <td>Missing</td> <td>7241 (11.04)</td> </tr> </tbody> </table> | Value | N (%) | 0 | 57032 (86.99) | 1 | 1289 (1.97)   | Missing | 7241 (11.04) |
| Value                                                                                                                                                                 | N (%)                                                                                                               |                                                                                                                                                   |                                                                                                                                                                                                                                                  |       |       |   |               |   |               |         |              |
| 0                                                                                                                                                                     | 57032 (86.99)                                                                                                       |                                                                                                                                                   |                                                                                                                                                                                                                                                  |       |       |   |               |   |               |         |              |
| 1                                                                                                                                                                     | 1289 (1.97)                                                                                                         |                                                                                                                                                   |                                                                                                                                                                                                                                                  |       |       |   |               |   |               |         |              |
| Missing                                                                                                                                                               | 7241 (11.04)                                                                                                        |                                                                                                                                                   |                                                                                                                                                                                                                                                  |       |       |   |               |   |               |         |              |
| <b>Frailty Index Scoring:</b><br>$\sum(\text{variables})/40$<br><b>Score range: 0 – 1</b><br><b>Cut points:</b><br><b>Robust = 0 to &lt; 0.25, Frail = 0.25 – 1.0</b> |                                                                                                                     |                                                                                                                                                   | <table border="1"> <thead> <tr> <th>Value</th> <th>N (%)</th> </tr> </thead> <tbody> <tr> <td>0</td> <td>42767 (65.23)</td> </tr> <tr> <td>1</td> <td>14882 (22.70)</td> </tr> <tr> <td>Missing</td> <td>7913 (.07)</td> </tr> </tbody> </table> | Value | N (%) | 0 | 42767 (65.23) | 1 | 14882 (22.70) | Missing | 7913 (.07)   |
| Value                                                                                                                                                                 | N (%)                                                                                                               |                                                                                                                                                   |                                                                                                                                                                                                                                                  |       |       |   |               |   |               |         |              |
| 0                                                                                                                                                                     | 42767 (65.23)                                                                                                       |                                                                                                                                                   |                                                                                                                                                                                                                                                  |       |       |   |               |   |               |         |              |
| 1                                                                                                                                                                     | 14882 (22.70)                                                                                                       |                                                                                                                                                   |                                                                                                                                                                                                                                                  |       |       |   |               |   |               |         |              |
| Missing                                                                                                                                                               | 7913 (.07)                                                                                                          |                                                                                                                                                   |                                                                                                                                                                                                                                                  |       |       |   |               |   |               |         |              |

\* Unweighted figures.

† ADL: Activities of Daily Living; IADL: Instrumental Activities of Daily Living

1  
2  
3  
4  
5  
6  
7  
8  
9  
10  
11  
12  
13  
14  
15  
16  
17  
18  
19  
20  
21  
22  
23  
24  
25  
26  
27  
28  
29  
30  
31  
32  
33  
34  
35  
36  
37  
38  
39  
40  
41  
42  
43  
44  
45  
46

**S2 Table. Definition of outcomes – hospitalization in last 12 months and any fall in past 2 years.**

| Survey questions                                                                                                                                                                                                                                                                                                                                                                                                                                                                                                                                                                                                                                                                                                                                                                                                                                                                                                                                                                                                                                                                                                                                                                                                                                                                                                                                                   | Outcome definition                                                                                                                                                                                                                                                                                                                                                                                                                                                                                                                                                                                         |
|--------------------------------------------------------------------------------------------------------------------------------------------------------------------------------------------------------------------------------------------------------------------------------------------------------------------------------------------------------------------------------------------------------------------------------------------------------------------------------------------------------------------------------------------------------------------------------------------------------------------------------------------------------------------------------------------------------------------------------------------------------------------------------------------------------------------------------------------------------------------------------------------------------------------------------------------------------------------------------------------------------------------------------------------------------------------------------------------------------------------------------------------------------------------------------------------------------------------------------------------------------------------------------------------------------------------------------------------------------------------|------------------------------------------------------------------------------------------------------------------------------------------------------------------------------------------------------------------------------------------------------------------------------------------------------------------------------------------------------------------------------------------------------------------------------------------------------------------------------------------------------------------------------------------------------------------------------------------------------------|
| <p><b>Q1. In the past 12 months, have you visited any health care facility, or any health professional has visited you?</b> <i>[Please identify ALL the facilities that you have visited]</i><br/> <i>[Instruction: If response is 'p' freeze all other options]</i></p> <p><b>Public facility:</b></p> <ul style="list-style-type: none"> <li>a. Health post/sub centers</li> <li>b. Primary health center/Urban Health Center</li> <li>c. Community health center</li> <li>d. District / Sub-district hospital</li> <li>e. Government/tertiary hospital</li> <li>f. Govt. AYUSH hospital</li> </ul> <p><b>Private facility:</b></p> <ul style="list-style-type: none"> <li>g. Private hospital/nursing home</li> <li>h. Private clinic (OPD based services)</li> <li>i. NGO/Charity/Trust/Church-run hospital</li> <li>j. Private AYUSH hospital</li> </ul> <p><b>Others:</b></p> <ul style="list-style-type: none"> <li>k. Health camp</li> <li>l. Mobile healthcare unit</li> <li>m. Pharmacy/drugstore</li> <li>n. Home visit</li> <li>o. Other, please specify _____</li> <li>p. None</li> </ul> <p><b>Q2. Over the last 12 months, how many times you were admitted as patient to a hospital/long-term care facility for at least one night?</b> <i>[Instruction for the interviewer: If respondent did not stay at hospital, enter '0']</i> _____Times</p> | <p><b>Number of hospitalizations in past 12 months</b> was defined as response to Q2. Respondents who said 'None' to Q1 were also coded as '0'.</p> <p>The variable <b>ever hospitalised in past 12 months</b> was coded as 'yes' if the number of hospitalizations was 1 or more and 'no' if 0.</p> <p>Respondents with a non-zero response to Q2 were then asked Q3. The maximum of the responses to the two questions, Q2 and Q3, was used to construct the count variable <b>number of nights in hospital in past 12 months</b>. In addition, respondents who said 'None' to Q1 were coded as '0'.</p> |

1  
2  
3  
4  
5  
6  
7  
8  
9  
10  
11  
12  
13  
14  
15  
16  
17  
18  
19  
20  
21  
22  
23  
24  
25  
26  
27  
28  
29  
30  
31  
32  
33  
34  
35  
36  
37  
38  
39  
40  
41  
42  
43  
44  
45  
46

|                                                                                                                                                                                                                                                                                                                                                                                                                                                                                                                                                |                                                                                                                                                                                      |
|------------------------------------------------------------------------------------------------------------------------------------------------------------------------------------------------------------------------------------------------------------------------------------------------------------------------------------------------------------------------------------------------------------------------------------------------------------------------------------------------------------------------------------------------|--------------------------------------------------------------------------------------------------------------------------------------------------------------------------------------|
| <p><b>Q3. [Ask only if Q2 ≥ 1] How many nights have you spent in the hospital during the past 12 months?</b> Number of nights _____</p>                                                                                                                                                                                                                                                                                                                                                                                                        |                                                                                                                                                                                      |
| <p><b>Q1. In the past two years, have you sustained any major injury?</b><br/> 1. Yes<br/> 2. No</p> <p><b>Q2. [Ask only if Q1=1] What was the cause of that injury? [Multiple answers are allowed]</b><br/> a. Traffic accident<br/> b. Struck by person or object<br/> c. Fire, flames, burn, electric Shock<br/> d. Drowning<br/> e. Poisoning<br/> f. Animal attack or bite<br/> g. Fall<br/> h. Other, please specify _____</p> <p><b>Q3. [Ask only if Q2≠ g] In the past two years, have you fallen down?</b><br/> 1. Yes<br/> 2. No</p> | <p>Individuals having <b>any fall in last 2 years</b> were identified as those who responded 'Yes' to Q1 and identified 'Fall' in response to Q2, or those who said 'Yes' to Q3.</p> |



**S3 Table. Construction of cognition score and distribution of its components.**

| Domain             | Item                  | Measurement                                                                                                          | Questions                                                                                                                            | Range | Distribution in 45-plus participants (n=65,562) |              |
|--------------------|-----------------------|----------------------------------------------------------------------------------------------------------------------|--------------------------------------------------------------------------------------------------------------------------------------|-------|-------------------------------------------------|--------------|
| <b>Memory</b>      | Immediate word recall | Interviewer read out a list of 10 words and respondents were asked to repeat the words.                              | I will read a set of 10 words and ask you to recall as many as you can.<br>1. Number of words respondent (R) correctly recalls _____ | 0-10  | 0                                               | 538 (0.8)    |
|                    |                       |                                                                                                                      |                                                                                                                                      |       | 1                                               | 1057 (1.7)   |
|                    |                       |                                                                                                                      |                                                                                                                                      |       | 2                                               | 3159 (4.9)   |
|                    |                       |                                                                                                                      |                                                                                                                                      |       | 3                                               | 6899 (10.8)  |
|                    |                       |                                                                                                                      |                                                                                                                                      |       | 4                                               | 11872 (18.6) |
|                    |                       |                                                                                                                      |                                                                                                                                      |       | 5                                               | 14183 (22.2) |
|                    |                       |                                                                                                                      |                                                                                                                                      |       | 6                                               | 12298 (19.2) |
|                    |                       |                                                                                                                      |                                                                                                                                      |       | 7                                               | 8243 (12.9)  |
|                    |                       |                                                                                                                      |                                                                                                                                      |       | 8                                               | 3884 (6.1)   |
|                    |                       |                                                                                                                      |                                                                                                                                      |       | 9                                               | 1238 (1.9)   |
|                    |                       |                                                                                                                      |                                                                                                                                      |       | 10                                              | 595 (0.9)    |
|                    |                       |                                                                                                                      |                                                                                                                                      |       | Missing                                         | 1596         |
|                    | Delayed word recall   | Respondents were asked to recall the same words read out for immediate recall after some time.                       | 1. Number of words respondent (R) correctly recalls _____                                                                            | 0-10  | 1                                               | 4399 (7.3)   |
|                    |                       |                                                                                                                      |                                                                                                                                      |       | 2                                               | 8068 (13.5)  |
|                    |                       |                                                                                                                      |                                                                                                                                      |       | 3                                               | 12022 (20)   |
|                    |                       |                                                                                                                      |                                                                                                                                      |       | 4                                               | 12800 (21.3) |
|                    |                       |                                                                                                                      |                                                                                                                                      |       | 5                                               | 9970 (16.6)  |
|                    |                       |                                                                                                                      |                                                                                                                                      |       | 6                                               | 6505 (10.8)  |
|                    |                       |                                                                                                                      |                                                                                                                                      |       | 7                                               | 3541 (5.9)   |
|                    |                       |                                                                                                                      |                                                                                                                                      |       | 8                                               | 1662 (2.8)   |
|                    |                       |                                                                                                                      |                                                                                                                                      |       | 9                                               | 609 (1)      |
|                    |                       |                                                                                                                      |                                                                                                                                      |       | 10                                              | 393 (0.7)    |
|                    |                       |                                                                                                                      |                                                                                                                                      |       | Missing                                         | 5593         |
| <b>Orientation</b> | Time                  | Respondents were asked to state today's date, month and year and day of the week. For each question, the score was 0 | Date<br>1. Correct<br>2. Incorrect<br>Month                                                                                          | 0-4   | 0                                               | 1345 (2.1)   |
|                    |                       |                                                                                                                      |                                                                                                                                      |       | 1                                               | 7306 (11.4)  |
|                    |                       |                                                                                                                      |                                                                                                                                      |       | 2                                               | 10485 (16.4) |

|                            |                   |                                                                                                                                                                                                                                                        |                                                                                                                                                                                                                                                                                                                                                                                                                                              |     |                                                                                                                                                                                                                                                                                                           |   |              |   |              |         |              |         |             |   |              |         |      |
|----------------------------|-------------------|--------------------------------------------------------------------------------------------------------------------------------------------------------------------------------------------------------------------------------------------------------|----------------------------------------------------------------------------------------------------------------------------------------------------------------------------------------------------------------------------------------------------------------------------------------------------------------------------------------------------------------------------------------------------------------------------------------------|-----|-----------------------------------------------------------------------------------------------------------------------------------------------------------------------------------------------------------------------------------------------------------------------------------------------------------|---|--------------|---|--------------|---------|--------------|---------|-------------|---|--------------|---------|------|
|                            |                   | (incorrect responses) or 1 (correct responses).                                                                                                                                                                                                        | <p>1. Correct<br/>2. Incorrect</p> <p>Year</p> <p>1. Correct<br/>2. Incorrect</p> <p>Please tell me which day of week is today. Is it Monday, Tuesday, Wednesday, Thursday, Friday, Saturday, or Sunday?</p> <p>1. Correct<br/>2. Incorrect</p>                                                                                                                                                                                              |     | <table border="1"> <tbody> <tr> <td>3</td> <td>10599 (16.6)</td> </tr> <tr> <td>4</td> <td>34209 (53.5)</td> </tr> <tr> <td>Missing</td> <td>1618</td> </tr> </tbody> </table>                                                                                                                            | 3 | 10599 (16.6) | 4 | 34209 (53.5) | Missing | 1618         |         |             |   |              |         |      |
| 3                          | 10599 (16.6)      |                                                                                                                                                                                                                                                        |                                                                                                                                                                                                                                                                                                                                                                                                                                              |     |                                                                                                                                                                                                                                                                                                           |   |              |   |              |         |              |         |             |   |              |         |      |
| 4                          | 34209 (53.5)      |                                                                                                                                                                                                                                                        |                                                                                                                                                                                                                                                                                                                                                                                                                                              |     |                                                                                                                                                                                                                                                                                                           |   |              |   |              |         |              |         |             |   |              |         |      |
| Missing                    | 1618              |                                                                                                                                                                                                                                                        |                                                                                                                                                                                                                                                                                                                                                                                                                                              |     |                                                                                                                                                                                                                                                                                                           |   |              |   |              |         |              |         |             |   |              |         |      |
|                            | Place             | Orientation towards place was captured based on place of interview, name of the village, street number/colony name/landmark/neighbourhood and name of the district. For each question, the score was 0 (incorrect responses) or 1 (correct responses). | <p>What is this place used for? [plausible answers are specific answers such as living room, house, apartment, hospital, market, etc.]</p> <p>1. Correct<br/>2. Incorrect</p> <p>What is your address? Name of village/town/city</p> <p>1. Correct<br/>2. Incorrect</p> <p>Street number/ colony name/landmark/neighbourhood</p> <p>1. Correct<br/>2. Incorrect</p> <p>What is name of your district?</p> <p>1. Correct<br/>2. Incorrect</p> | 0-4 | <table border="1"> <tbody> <tr> <td>0</td> <td>125 (0.2)</td> </tr> <tr> <td>1</td> <td>419 (0.7)</td> </tr> <tr> <td>2</td> <td>1429 (2.2)</td> </tr> <tr> <td>3</td> <td>6775 (10.7)</td> </tr> <tr> <td>4</td> <td>54818 (86.2)</td> </tr> <tr> <td>Missing</td> <td>1996</td> </tr> </tbody> </table> | 0 | 125 (0.2)    | 1 | 419 (0.7)    | 2       | 1429 (2.2)   | 3       | 6775 (10.7) | 4 | 54818 (86.2) | Missing | 1996 |
| 0                          | 125 (0.2)         |                                                                                                                                                                                                                                                        |                                                                                                                                                                                                                                                                                                                                                                                                                                              |     |                                                                                                                                                                                                                                                                                                           |   |              |   |              |         |              |         |             |   |              |         |      |
| 1                          | 419 (0.7)         |                                                                                                                                                                                                                                                        |                                                                                                                                                                                                                                                                                                                                                                                                                                              |     |                                                                                                                                                                                                                                                                                                           |   |              |   |              |         |              |         |             |   |              |         |      |
| 2                          | 1429 (2.2)        |                                                                                                                                                                                                                                                        |                                                                                                                                                                                                                                                                                                                                                                                                                                              |     |                                                                                                                                                                                                                                                                                                           |   |              |   |              |         |              |         |             |   |              |         |      |
| 3                          | 6775 (10.7)       |                                                                                                                                                                                                                                                        |                                                                                                                                                                                                                                                                                                                                                                                                                                              |     |                                                                                                                                                                                                                                                                                                           |   |              |   |              |         |              |         |             |   |              |         |      |
| 4                          | 54818 (86.2)      |                                                                                                                                                                                                                                                        |                                                                                                                                                                                                                                                                                                                                                                                                                                              |     |                                                                                                                                                                                                                                                                                                           |   |              |   |              |         |              |         |             |   |              |         |      |
| Missing                    | 1996              |                                                                                                                                                                                                                                                        |                                                                                                                                                                                                                                                                                                                                                                                                                                              |     |                                                                                                                                                                                                                                                                                                           |   |              |   |              |         |              |         |             |   |              |         |      |
| <b>Arithmetic function</b> | Backward counting | Respondents were asked to count backward as quickly as possible from the number 20. The respondents were asked to stop after correctly counting backward from 20 to 11 or from 19 to 10. Correct counting                                              | <p>Please try to count backward as quickly as you can from the number, I will give you. I will tell you when to stop. Please start with 20.</p> <p>1. R correctly counted (e.g., 19 – 10; 20 – 11) without error<br/>2. R made an error(s)</p>                                                                                                                                                                                               | 0-2 | <table border="1"> <tbody> <tr> <td>0</td> <td>19815 (31)</td> </tr> <tr> <td>1</td> <td>12274 (19.2)</td> </tr> <tr> <td>2</td> <td>31867 (49.8)</td> </tr> <tr> <td>Missing</td> <td>1606</td> </tr> </tbody> </table>                                                                                  | 0 | 19815 (31)   | 1 | 12274 (19.2) | 2       | 31867 (49.8) | Missing | 1606        |   |              |         |      |
| 0                          | 19815 (31)        |                                                                                                                                                                                                                                                        |                                                                                                                                                                                                                                                                                                                                                                                                                                              |     |                                                                                                                                                                                                                                                                                                           |   |              |   |              |         |              |         |             |   |              |         |      |
| 1                          | 12274 (19.2)      |                                                                                                                                                                                                                                                        |                                                                                                                                                                                                                                                                                                                                                                                                                                              |     |                                                                                                                                                                                                                                                                                                           |   |              |   |              |         |              |         |             |   |              |         |      |
| 2                          | 31867 (49.8)      |                                                                                                                                                                                                                                                        |                                                                                                                                                                                                                                                                                                                                                                                                                                              |     |                                                                                                                                                                                                                                                                                                           |   |              |   |              |         |              |         |             |   |              |         |      |
| Missing                    | 1606              |                                                                                                                                                                                                                                                        |                                                                                                                                                                                                                                                                                                                                                                                                                                              |     |                                                                                                                                                                                                                                                                                                           |   |              |   |              |         |              |         |             |   |              |         |      |

1  
2  
3  
4  
5  
6  
7  
8  
9  
10  
11  
12  
13  
14  
15  
16  
17  
18  
19  
20  
21  
22  
23  
24  
25  
26  
27  
28  
29  
30  
31  
32  
33  
34  
35  
36  
37  
38  
39  
40  
41  
42  
43  
44  
45  
46

|         |              |                                                                                                                                                                                                                      |                                                                                                                                                                                                                                                                                                                                                                                                                                                                                                                                                          |     |                                                                                                                                                                                                                                                                                                                   |   |              |   |             |   |              |         |             |   |            |   |              |         |      |
|---------|--------------|----------------------------------------------------------------------------------------------------------------------------------------------------------------------------------------------------------------------|----------------------------------------------------------------------------------------------------------------------------------------------------------------------------------------------------------------------------------------------------------------------------------------------------------------------------------------------------------------------------------------------------------------------------------------------------------------------------------------------------------------------------------------------------------|-----|-------------------------------------------------------------------------------------------------------------------------------------------------------------------------------------------------------------------------------------------------------------------------------------------------------------------|---|--------------|---|-------------|---|--------------|---------|-------------|---|------------|---|--------------|---------|------|
|         |              | received 2 points; counts with a mistake received 1 point. Those who could not count received 0 points.                                                                                                              | 3. R cannot count                                                                                                                                                                                                                                                                                                                                                                                                                                                                                                                                        |     |                                                                                                                                                                                                                                                                                                                   |   |              |   |             |   |              |         |             |   |            |   |              |         |      |
|         | Serial       | Respondents were asked to subtract seven from 100 in the first step and asked to continue subtracting seven from the previous number in each subsequent step for five times. Each correct response received 1 point. | <p>Now let's try some subtraction of numbers. One hundred minus 7 equals what?<br/>Enter the answer R gave:<br/>1. _____<br/>2. R cannot count, skip next questions, and go to 'computation'<br/>And 7 from that equals what?<br/>[Interviewer: enter the answer R gave]<br/>_____<br/>And 7 from that equals what?<br/>[Interviewer: enter the answer R gave]<br/>_____<br/>And 7 from that equals what?<br/>[Interviewer: enter the answer R gave]<br/>_____<br/>And 7 from that equals what?<br/>[Interviewer: enter the answer R gave]<br/>_____</p> | 0-5 | <table border="1"> <tr><td>0</td><td>21325 (36.5)</td></tr> <tr><td>1</td><td>5131 (8.8)</td></tr> <tr><td>2</td><td>5791 (9.9)</td></tr> <tr><td>3</td><td>7776 (13.3)</td></tr> <tr><td>4</td><td>5778 (9.9)</td></tr> <tr><td>5</td><td>12599 (21.6)</td></tr> <tr><td>Missing</td><td>7162</td></tr> </table> | 0 | 21325 (36.5) | 1 | 5131 (8.8)  | 2 | 5791 (9.9)   | 3       | 7776 (13.3) | 4 | 5778 (9.9) | 5 | 12599 (21.6) | Missing | 7162 |
| 0       | 21325 (36.5) |                                                                                                                                                                                                                      |                                                                                                                                                                                                                                                                                                                                                                                                                                                                                                                                                          |     |                                                                                                                                                                                                                                                                                                                   |   |              |   |             |   |              |         |             |   |            |   |              |         |      |
| 1       | 5131 (8.8)   |                                                                                                                                                                                                                      |                                                                                                                                                                                                                                                                                                                                                                                                                                                                                                                                                          |     |                                                                                                                                                                                                                                                                                                                   |   |              |   |             |   |              |         |             |   |            |   |              |         |      |
| 2       | 5791 (9.9)   |                                                                                                                                                                                                                      |                                                                                                                                                                                                                                                                                                                                                                                                                                                                                                                                                          |     |                                                                                                                                                                                                                                                                                                                   |   |              |   |             |   |              |         |             |   |            |   |              |         |      |
| 3       | 7776 (13.3)  |                                                                                                                                                                                                                      |                                                                                                                                                                                                                                                                                                                                                                                                                                                                                                                                                          |     |                                                                                                                                                                                                                                                                                                                   |   |              |   |             |   |              |         |             |   |            |   |              |         |      |
| 4       | 5778 (9.9)   |                                                                                                                                                                                                                      |                                                                                                                                                                                                                                                                                                                                                                                                                                                                                                                                                          |     |                                                                                                                                                                                                                                                                                                                   |   |              |   |             |   |              |         |             |   |            |   |              |         |      |
| 5       | 12599 (21.6) |                                                                                                                                                                                                                      |                                                                                                                                                                                                                                                                                                                                                                                                                                                                                                                                                          |     |                                                                                                                                                                                                                                                                                                                   |   |              |   |             |   |              |         |             |   |            |   |              |         |      |
| Missing | 7162         |                                                                                                                                                                                                                      |                                                                                                                                                                                                                                                                                                                                                                                                                                                                                                                                                          |     |                                                                                                                                                                                                                                                                                                                   |   |              |   |             |   |              |         |             |   |            |   |              |         |      |
|         | Computation  | This test involved the mathematical operation of division. Respondents were asked to compute the net sale price of a product after considering a discount sale of half of the original price.                        | <p>A shop is having a sale and selling all items at half price. Before the sale, a sari cost 300 Rs. How much will it cost in the sale?<br/>1. R gave the correct answer of 150 Rs<br/>2. R gave incorrect answer<br/>If 5 people all have the winning numbers in the lottery and the prize is 1,000 Rs, how much will each of them get?<br/>1. R gave the correct answer of 200 Rs<br/>2. R gave incorrect answer</p>                                                                                                                                   | 0-2 | <table border="1"> <tr><td>0</td><td>5758 (9.3)</td></tr> <tr><td>1</td><td>9856 (15.9)</td></tr> <tr><td>2</td><td>46414 (74.8)</td></tr> <tr><td>Missing</td><td>3534</td></tr> </table>                                                                                                                        | 0 | 5758 (9.3)   | 1 | 9856 (15.9) | 2 | 46414 (74.8) | Missing | 3534        |   |            |   |              |         |      |
| 0       | 5758 (9.3)   |                                                                                                                                                                                                                      |                                                                                                                                                                                                                                                                                                                                                                                                                                                                                                                                                          |     |                                                                                                                                                                                                                                                                                                                   |   |              |   |             |   |              |         |             |   |            |   |              |         |      |
| 1       | 9856 (15.9)  |                                                                                                                                                                                                                      |                                                                                                                                                                                                                                                                                                                                                                                                                                                                                                                                                          |     |                                                                                                                                                                                                                                                                                                                   |   |              |   |             |   |              |         |             |   |            |   |              |         |      |
| 2       | 46414 (74.8) |                                                                                                                                                                                                                      |                                                                                                                                                                                                                                                                                                                                                                                                                                                                                                                                                          |     |                                                                                                                                                                                                                                                                                                                   |   |              |   |             |   |              |         |             |   |            |   |              |         |      |
| Missing | 3534         |                                                                                                                                                                                                                      |                                                                                                                                                                                                                                                                                                                                                                                                                                                                                                                                                          |     |                                                                                                                                                                                                                                                                                                                   |   |              |   |             |   |              |         |             |   |            |   |              |         |      |

|                           |                           |                                                                                                                                                                                                                                                         |                                                                                                                                                                                                                                                                                                                                                                                                                                                         |     |                                                                                                                                                                                                                                                                  |   |              |   |              |         |              |         |              |         |      |
|---------------------------|---------------------------|---------------------------------------------------------------------------------------------------------------------------------------------------------------------------------------------------------------------------------------------------------|---------------------------------------------------------------------------------------------------------------------------------------------------------------------------------------------------------------------------------------------------------------------------------------------------------------------------------------------------------------------------------------------------------------------------------------------------------|-----|------------------------------------------------------------------------------------------------------------------------------------------------------------------------------------------------------------------------------------------------------------------|---|--------------|---|--------------|---------|--------------|---------|--------------|---------|------|
| <b>Executive function</b> | Executive (paper folding) | This is a three-stage command task. The respondents were instructed to take a piece of paper from the interviewer, turn it over, fold it in half, and give it back to the interviewer. Three points were given if each task was completed successfully. | When I give you a piece of paper, please turn it over, fold it in half, and give it back to me.<br>1. One of the tasks – turning/folding/returning actions is completed successfully<br>2. Two of the tasks – turning/folding/returning actions are completed successfully<br>3. All of the tasks – turning/folding/returning actions are completed successfully<br>4. None of the tasks – turning/folding/returning actions is completed successfully. | 0-3 | <table border="1"> <tbody> <tr> <td>0</td> <td>3197 (5)</td> </tr> <tr> <td>1</td> <td>12511 (19.5)</td> </tr> <tr> <td>2</td> <td>25640 (40)</td> </tr> <tr> <td>3</td> <td>22757 (35.5)</td> </tr> <tr> <td>Missing</td> <td>1457</td> </tr> </tbody> </table> | 0 | 3197 (5)     | 1 | 12511 (19.5) | 2       | 25640 (40)   | 3       | 22757 (35.5) | Missing | 1457 |
|                           | 0                         | 3197 (5)                                                                                                                                                                                                                                                |                                                                                                                                                                                                                                                                                                                                                                                                                                                         |     |                                                                                                                                                                                                                                                                  |   |              |   |              |         |              |         |              |         |      |
| 1                         | 12511 (19.5)              |                                                                                                                                                                                                                                                         |                                                                                                                                                                                                                                                                                                                                                                                                                                                         |     |                                                                                                                                                                                                                                                                  |   |              |   |              |         |              |         |              |         |      |
| 2                         | 25640 (40)                |                                                                                                                                                                                                                                                         |                                                                                                                                                                                                                                                                                                                                                                                                                                                         |     |                                                                                                                                                                                                                                                                  |   |              |   |              |         |              |         |              |         |      |
| 3                         | 22757 (35.5)              |                                                                                                                                                                                                                                                         |                                                                                                                                                                                                                                                                                                                                                                                                                                                         |     |                                                                                                                                                                                                                                                                  |   |              |   |              |         |              |         |              |         |      |
| Missing                   | 1457                      |                                                                                                                                                                                                                                                         |                                                                                                                                                                                                                                                                                                                                                                                                                                                         |     |                                                                                                                                                                                                                                                                  |   |              |   |              |         |              |         |              |         |      |
|                           | Pentagon drawing          | Visio-construction is the ability to coordinate fine motor skills with visuospatial abilities, usually by reproducing geometric figures. Respondents were asked to copy two overlapping pentagons and scored 1 point for a correct drawing.             | Do you see this picture? Please draw that picture on this paper. [Show the picture of two pentagons overlapped]<br>1. Drew picture<br>2. Failed to draw picture<br>3. Not applicable.                                                                                                                                                                                                                                                                   | 0-1 | <table border="1"> <tbody> <tr> <td>0</td> <td>31187 (55.5)</td> </tr> <tr> <td>1</td> <td>25051 (44.5)</td> </tr> <tr> <td>Missing</td> <td>9324</td> </tr> </tbody> </table>                                                                                   | 0 | 31187 (55.5) | 1 | 25051 (44.5) | Missing | 9324         |         |              |         |      |
| 0                         | 31187 (55.5)              |                                                                                                                                                                                                                                                         |                                                                                                                                                                                                                                                                                                                                                                                                                                                         |     |                                                                                                                                                                                                                                                                  |   |              |   |              |         |              |         |              |         |      |
| 1                         | 25051 (44.5)              |                                                                                                                                                                                                                                                         |                                                                                                                                                                                                                                                                                                                                                                                                                                                         |     |                                                                                                                                                                                                                                                                  |   |              |   |              |         |              |         |              |         |      |
| Missing                   | 9324                      |                                                                                                                                                                                                                                                         |                                                                                                                                                                                                                                                                                                                                                                                                                                                         |     |                                                                                                                                                                                                                                                                  |   |              |   |              |         |              |         |              |         |      |
| <b>Object naming</b>      |                           | The interviewer points to a specific object and asks the respondent to name it. Two objects were pointed out and 1 point was given for each correct response.                                                                                           | What is this? [Items can be anything from cell phones, gloves, hats, rings, and umbrella that can be within close reach.]<br>1. Correct<br>2. Incorrect<br>What is this?<br>1. Correct<br>2. Incorrect                                                                                                                                                                                                                                                  | 0-2 | <table border="1"> <tbody> <tr> <td>0</td> <td>646 (1)</td> </tr> <tr> <td>1</td> <td>2509 (3.9)</td> </tr> <tr> <td>2</td> <td>61158 (95.1)</td> </tr> <tr> <td>Missing</td> <td>1249</td> </tr> </tbody> </table>                                              | 0 | 646 (1)      | 1 | 2509 (3.9)   | 2       | 61158 (95.1) | Missing | 1249         |         |      |
| 0                         | 646 (1)                   |                                                                                                                                                                                                                                                         |                                                                                                                                                                                                                                                                                                                                                                                                                                                         |     |                                                                                                                                                                                                                                                                  |   |              |   |              |         |              |         |              |         |      |
| 1                         | 2509 (3.9)                |                                                                                                                                                                                                                                                         |                                                                                                                                                                                                                                                                                                                                                                                                                                                         |     |                                                                                                                                                                                                                                                                  |   |              |   |              |         |              |         |              |         |      |
| 2                         | 61158 (95.1)              |                                                                                                                                                                                                                                                         |                                                                                                                                                                                                                                                                                                                                                                                                                                                         |     |                                                                                                                                                                                                                                                                  |   |              |   |              |         |              |         |              |         |      |
| Missing                   | 1249                      |                                                                                                                                                                                                                                                         |                                                                                                                                                                                                                                                                                                                                                                                                                                                         |     |                                                                                                                                                                                                                                                                  |   |              |   |              |         |              |         |              |         |      |

Composite cognition score is the combined score of memory, orientation, arithmetic function, executive function, and object naming and is obtained by summing up the responses for all these items. It ranges from 0-43.

**S4 Table. Characteristics of excluded participants and participants included in various analyses.**

| Characteristic                   | Frailty index based on 40 deficits        |                                                                    |                                                            |                                                 |                                                     | Frailty index defined based on non-missing deficits <sup>#</sup> |                                               |
|----------------------------------|-------------------------------------------|--------------------------------------------------------------------|------------------------------------------------------------|-------------------------------------------------|-----------------------------------------------------|------------------------------------------------------------------|-----------------------------------------------|
|                                  | 45-plus adults with frailty index missing | Study participants (45-plus adults with frailty index non-missing) | Study participants with non-missing hospitalization status | Study participants with non-missing fall status | Study participants with non-missing cognition score | Frailty index missing                                            | 45-plus adults with frailty index non-missing |
|                                  | N = 7,913                                 | N = 57,649                                                         | N = 56,790                                                 | N = 57,642                                      | N = 42,015                                          | N = 1,231                                                        | N = 64,331                                    |
| <b>Sex</b>                       |                                           |                                                                    |                                                            |                                                 |                                                     |                                                                  |                                               |
| <i>Female</i>                    | 4,209 (53%)                               | 30,874 (54%)                                                       | 30,422 (54%)                                               | 30,871 (54%)                                    | 20,767 (49%)                                        | 622 (51%)                                                        | 34,461 (54%)                                  |
| <i>Male</i>                      | 3,704 (47%)                               | 26,775 (46%)                                                       | 26,368 (46%)                                               | 26,771 (46%)                                    | 21,248 (51%)                                        | 609 (49%)                                                        | 29,870 (46%)                                  |
| <b>Age, Median (Q1 – Q3)*</b>    | 61 (52, 70)                               | 58 (50, 66)                                                        | 58 (50, 66)                                                | 58 (50, 66)                                     | 57 (50, 65)                                         | 65 (55, 76)                                                      | 59 (51, 67)                                   |
| <b>Place of residence</b>        |                                           |                                                                    |                                                            |                                                 |                                                     |                                                                  |                                               |
| <i>Rural</i>                     | 4,619 (58%)                               | 37,805 (66%)                                                       | 37,202 (66%)                                               | 37,799 (66%)                                    | 26,212 (62%)                                        | 739 (60%)                                                        | 41,685 (65%)                                  |
| <i>Urban</i>                     | 3,294 (42%)                               | 19,844 (34%)                                                       | 19,588 (34%)                                               | 19,843 (34%)                                    | 15,803 (38%)                                        | 492 (40%)                                                        | 22,646 (35%)                                  |
| <b>Educational status</b>        |                                           |                                                                    |                                                            |                                                 |                                                     |                                                                  |                                               |
| <i>No schooling</i>              | 3,857 (49%)                               | 26,961 (47%)                                                       | 26,488 (47%)                                               | 26,958 (47%)                                    | 16,083 (38%)                                        | 665 (54%)                                                        | 30,153 (47%)                                  |
| <i>Less than 5 years</i>         | 740 (9.4%)                                | 6,738 (12%)                                                        | 6,653 (12%)                                                | 6,736 (12%)                                     | 4,952 (12%)                                         | 137 (11%)                                                        | 7,341 (11%)                                   |
| <i>5 to 9 years</i>              | 1,579 (20%)                               | 13,280 (23%)                                                       | 13,125 (23%)                                               | 13,279 (23%)                                    | 11,155 (27%)                                        | 211 (17%)                                                        | 14,648 (23%)                                  |
| <i>10 years or more</i>          | 1,734 (22%)                               | 10,670 (19%)                                                       | 10,524 (19%)                                               | 10,669 (19%)                                    | 9,825 (23%)                                         | 216 (18%)                                                        | 12,188 (19%)                                  |
| Missing                          | 3                                         |                                                                    |                                                            |                                                 |                                                     | 2                                                                | 1                                             |
| <b>MPCE quintile<sup>†</sup></b> |                                           |                                                                    |                                                            |                                                 |                                                     |                                                                  |                                               |
| <i>Poorest</i>                   | 1,583 (20%)                               | 11,358 (20%)                                                       | 11,174 (20%)                                               | 11,356 (20%)                                    | 7,923 (19%)                                         | 289 (23%)                                                        | 12,652 (20%)                                  |
| <i>Poorer</i>                    | 1,517 (19%)                               | 11,673 (20%)                                                       | 11,487 (20%)                                               | 11,673 (20%)                                    | 8,336 (20%)                                         | 258 (21%)                                                        | 12,932 (20%)                                  |
| <i>Middle</i>                    | 1,487 (19%)                               | 11,676 (20%)                                                       | 11,500 (20%)                                               | 11,674 (20%)                                    | 8,405 (20%)                                         | 235 (19%)                                                        | 12,928 (20%)                                  |
| <i>Richer</i>                    | 1,577 (20%)                               | 11,633 (20%)                                                       | 11,451 (20%)                                               | 11,631 (20%)                                    | 8,727 (21%)                                         | 222 (18%)                                                        | 12,988 (20%)                                  |
| <i>Richest</i>                   | 1,749 (22%)                               | 11,309 (20%)                                                       | 11,178 (20%)                                               | 11,308 (20%)                                    | 8,624 (21%)                                         | 227 (18%)                                                        | 12,831 (20%)                                  |
| <b>Living arrangement</b>        |                                           |                                                                    |                                                            |                                                 |                                                     |                                                                  |                                               |
| <i>Living alone</i>              | 279 (3.5%)                                | 2,034 (3.5%)                                                       | 2,008 (3.5%)                                               | 2,034 (3.5%)                                    | 1,302 (3.1%)                                        | 40 (3.2%)                                                        | 2,273 (3.5%)                                  |

|                                                       |             |              |              |              |              |             |              |
|-------------------------------------------------------|-------------|--------------|--------------|--------------|--------------|-------------|--------------|
| <i>Living with spouse with or without children</i>    | 5,270 (67%) | 42,607 (74%) | 41,988 (74%) | 42,604 (74%) | 32,345 (77%) | 689 (56%)   | 47,188 (73%) |
| <i>Living with children and others</i>                | 1,732 (22%) | 10,709 (19%) | 10,527 (19%) | 10,706 (19%) | 6,786 (16%)  | 272 (22%)   | 12,169 (19%) |
| <i>Living with others only</i>                        | 632 (8.0%)  | 2,299 (4.0%) | 2,267 (4.0%) | 2,298 (4.0%) | 1,582 (3.8%) | 230 (19%)   | 2,701 (4.2%) |
| <b>Employment</b>                                     |             |              |              |              |              |             |              |
| <i>Currently working<sup>s</sup></i>                  | 3,340 (42%) | 28,939 (50%) | 28,526 (50%) | 28,935 (50%) | 22,168 (53%) | 377 (31%)   | 31,902 (50%) |
| <i>Worked in the past</i>                             | 2,236 (28%) | 13,045 (23%) | 12,819 (23%) | 13,043 (23%) | 9,069 (22%)  | 481 (39%)   | 14,800 (23%) |
| <i>Never worked</i>                                   | 2,327 (29%) | 15,665 (27%) | 15,445 (27%) | 15,664 (27%) | 10,778 (26%) | 365 (30%)   | 17,627 (27%) |
| Missing                                               | 10          |              |              |              |              | 8           | 2            |
| <b>Food constraint<sup>¶</sup></b>                    |             |              |              |              |              |             |              |
| <i>No</i>                                             | 7,360 (93%) | 53,801 (93%) | 53,018 (93%) | 53,797 (93%) | 39,582 (94%) | 1,178 (96%) | 59,983 (93%) |
| <i>Yes</i>                                            | 553 (7.0%)  | 3,848 (6.7%) | 3,772 (6.6%) | 3,845 (6.7%) | 2,433 (5.8%) | 53 (4.3%)   | 4,348 (6.8%) |
| <b>Tobacco use</b>                                    |             |              |              |              |              |             |              |
| <i>Never used tobacco</i>                             | 4,894 (66%) | 36,252 (63%) | 35,747 (63%) | 36,249 (63%) | 26,313 (63%) | 451 (61%)   | 40,695 (63%) |
| <i>Current/past user</i>                              | 2,469 (34%) | 21,373 (37%) | 21,023 (37%) | 21,369 (37%) | 15,681 (37%) | 285 (39%)   | 23,557 (37%) |
| Missing                                               | 550         | 24           | 20           | 24           | 21           | 495         | 79           |
| <b>Alcohol</b>                                        |             |              |              |              |              |             |              |
| <i>Never consumed</i>                                 | 6,072 (82%) | 47,218 (82%) | 46,516 (82%) | 47,216 (82%) | 34,223 (81%) | 620 (84%)   | 52,670 (82%) |
| <i>Less than once a month in past 3 months</i>        | 738 (10%)   | 6,024 (10%)  | 5,914 (10%)  | 6,020 (10%)  | 4,642 (11%)  | 96 (13%)    | 6,666 (10%)  |
| <i>One to three days per month or more frequently</i> | 559 (7.6%)  | 4,397 (7.6%) | 4,354 (7.7%) | 4,396 (7.6%) | 3,145 (7.5%) | 21 (2.8%)   | 4,935 (7.7%) |
| Missing                                               | 544         | 10           | 6            | 10           | 5            | 494         | 60           |
| <b>Caste</b>                                          |             |              |              |              |              |             |              |
| <i>Scheduled caste</i>                                | 1,264 (16%) | 9,695 (17%)  | 9,515 (17%)  | 9,695 (17%)  | 6,854 (16%)  | 195 (16%)   | 10,764 (17%) |
| <i>Scheduled tribe</i>                                | 1,225 (15%) | 10,140 (18%) | 10,041 (18%) | 10,137 (18%) | 6,514 (16%)  | 211 (17%)   | 11,154 (17%) |

|                                                               |             |              |              |              |              |           |              |
|---------------------------------------------------------------|-------------|--------------|--------------|--------------|--------------|-----------|--------------|
| <i>Other backward class</i>                                   | 2,816 (36%) | 21,813 (38%) | 21,448 (38%) | 21,810 (38%) | 16,190 (39%) | 432 (35%) | 24,197 (38%) |
| <i>None of the above/No caste or tribe/Don't know/Missing</i> | 2,608 (33%) | 16,001 (28%) | 15,786 (28%) | 16,000 (28%) | 12,457 (30%) | 393 (32%) | 18,216 (28%) |
| <b>Religion</b>                                               |             |              |              |              |              |           |              |
| <i>Hindu</i>                                                  | 5,777 (73%) | 42,322 (73%) | 41,579 (73%) | 42,320 (73%) | 31,313 (75%) | 870 (71%) | 47,229 (73%) |
| <i>Muslim</i>                                                 | 997 (13%)   | 6,806 (12%)  | 6,724 (12%)  | 6,805 (12%)  | 4,834 (12%)  | 166 (13%) | 7,637 (12%)  |
| <i>Christian</i>                                              | 734 (9.3%)  | 5,802 (10%)  | 5,787 (10%)  | 5,800 (10%)  | 3,831 (9.1%) | 140 (11%) | 6,396 (9.9%) |
| <i>Other</i>                                                  | 405 (5.1%)  | 2,719 (4.7%) | 2,700 (4.8%) | 2,717 (4.7%) | 2,037 (4.8%) | 55 (4.5%) | 3,069 (4.8%) |
| <b>Region</b>                                                 |             |              |              |              |              |           |              |
| <i>North</i>                                                  | 1,429 (18%) | 10,537 (18%) | 10,222 (18%) | 10,535 (18%) | 8,015 (19%)  | 186 (15%) | 11,780 (18%) |
| <i>Central</i>                                                | 932 (12%)   | 7,975 (14%)  | 7,654 (13%)  | 7,975 (14%)  | 5,940 (14%)  | 167 (14%) | 8,740 (14%)  |
| <i>East</i>                                                   | 1,137 (14%) | 10,443 (18%) | 10,443 (18%) | 10,441 (18%) | 7,979 (19%)  | 189 (15%) | 11,391 (18%) |
| <i>Northeast</i>                                              | 962 (12%)   | 7,551 (13%)  | 7,546 (13%)  | 7,550 (13%)  | 5,191 (12%)  | 150 (12%) | 8,363 (13%)  |
| <i>West</i>                                                   | 1,314 (17%) | 7,580 (13%)  | 7,449 (13%)  | 7,579 (13%)  | 5,231 (12%)  | 223 (18%) | 8,671 (13%)  |
| <i>South</i>                                                  | 2,139 (27%) | 13,563 (24%) | 13,476 (24%) | 13,562 (24%) | 9,659 (23%)  | 316 (26%) | 15,386 (24%) |

Numbers presented in table are unweighted.

\* Q1: first quartile, Q3: third quartile.

† MPCE: monthly per capita expenditure which is defined as total monthly household consumption expenditure divided by household size. It includes household's per capita spending on food and non-food items including spending on health, education, utilities, etc.

§ Includes Temporarily laid off, on sick or other leave, or in job training

¶ Household food unavailability in the past 12 months, where household members either reduced their meal size, did not eat even though they were hungry, or did not eat for a whole day because enough food was not available in the household.

#Frailty index for an individual was calculated by summing the non-missing health deficit scores and then dividing by the total number of deficits measured in that individual (up to 3 were allowed to be missing).

**S5 Table. Prevalence of frailty, overall and by participants' background characteristics.**

| Characteristic                                 | All               | 45-60 years       | 60-plus years     |
|------------------------------------------------|-------------------|-------------------|-------------------|
| <b>Overall</b>                                 | 29.5 (28.7, 30.4) | 16.2 (15.4, 16.9) | 43.2 (41.9, 44.4) |
| <b>Sex</b>                                     |                   |                   |                   |
| Female                                         | 36.1 (34.9, 37.4) | 21.4 (20.2, 22.6) | 52.2 (50.4, 54.1) |
| Male                                           | 21.7 (20.8, 22.7) | 9.6 (8.5, 10.6)   | 33.2 (31.8, 34.6) |
| <b>5-year age group</b>                        |                   |                   |                   |
| 45-49                                          | 11.6 (10.5, 12.7) | 11.6 (10.5, 12.7) | -                 |
| 50-54                                          | 16.3 (14.8, 17.7) | 16.3 (14.8, 17.7) | -                 |
| 55-59                                          | 21.8 (20.1, 23.5) | 21.8 (20.1, 23.5) | -                 |
| 60-64                                          | 29.9 (28.4, 31.5) | -                 | 29.9 (28.4, 31.5) |
| 65-69                                          | 39 (36.3, 41.7)   | -                 | 39 (36.3, 41.7)   |
| 70-74                                          | 52.5 (49.3, 55.8) | -                 | 52.5 (49.3, 55.8) |
| 75-79                                          | 53.9 (50.4, 57.3) | -                 | 53.9 (50.4, 57.3) |
| 80-plus                                        | 67.9 (64.2, 71.6) | -                 | 67.9 (64.2, 71.6) |
| <b>Place of residence</b>                      |                   |                   |                   |
| Rural                                          | 30.8 (30.1, 31.5) | 17.5 (16.7, 18.3) | 43.7 (42.6, 44.8) |
| Urban                                          | 26.5 (24.3, 28.8) | 13.2 (11.5, 14.9) | 41.8 (38.3, 45.2) |
| <b>Educational status</b>                      |                   |                   |                   |
| No schooling                                   | 35.3 (34.4, 36.3) | 19.8 (18.7, 20.9) | 48 (46.6, 49.4)   |
| Less than 5 years                              | 34.2 (32.1, 36.2) | 19.7 (17.6, 21.8) | 47.6 (44.5, 50.8) |
| 5 to 9 years                                   | 24.7 (22.6, 26.9) | 15.1 (13.4, 16.8) | 37.4 (33.5, 41.3) |
| 10 years or more                               | 15.5 (12.8, 18.2) | 7.9 (6.3, 9.4)    | 27.3 (21.9, 32.7) |
| <b>MPCE fifths</b> <sup>†</sup>                |                   |                   |                   |
| Poorest                                        | 29.8 (28.4, 31.2) | 15 (13.4, 16.6)   | 44.3 (42.1, 46.4) |
| Poorer                                         | 29.9 (28.6, 31.3) | 16.9 (15.3, 18.4) | 42.9 (40.8, 45)   |
| Middle                                         | 28.8 (27.2, 30.4) | 16.1 (14.5, 17.7) | 41.2 (38.8, 43.6) |
| Richer                                         | 30.6 (28.2, 33)   | 17.4 (15.2, 19.6) | 44.1 (40.6, 47.7) |
| Richest                                        | 28.3 (25.7, 30.9) | 15.5 (13.6, 17.3) | 43.4 (39.4, 47.3) |
| <b>Living arrangement</b>                      |                   |                   |                   |
| Living alone                                   | 46.4 (42.8, 50)   | 22.7 (17.9, 27.5) | 53.7 (49.5, 57.9) |
| Living with spouse with or without children    | 24.2 (23.4, 24.9) | 15.5 (14.6, 16.3) | 36.2 (35, 37.5)   |
| Living with children and others                | 45.4 (42.9, 47.9) | 21.4 (19.2, 23.6) | 55.2 (52.3, 58.1) |
| Living with others only                        | 36 (31, 41)       | 13.1 (8.5, 17.8)  | 50.9 (46.7, 55.1) |
| <b>Employment</b>                              |                   |                   |                   |
| Currently working <sup>†</sup>                 | 18.4 (17.6, 19.3) | 12.4 (11.5, 13.3) | 29.3 (27.8, 30.8) |
| Worked in the past                             | 45.9 (44.4, 47.4) | 29.9 (27.3, 32.5) | 50.2 (48.5, 51.9) |
| Never worked                                   | 36.5 (34.2, 38.8) | 20.5 (18.6, 22.3) | 52.9 (49.8, 56)   |
| <b>Food constraint</b> <sup>§</sup>            |                   |                   |                   |
| No                                             | 28.3 (27.4, 29.2) | 15.2 (14.4, 16)   | 41.8 (40.4, 43.1) |
| Yes                                            | 44.1 (41.7, 46.5) | 28.2 (25.2, 31.2) | 58.4 (55, 61.7)   |
| <b>Tobacco use</b>                             |                   |                   |                   |
| Never used tobacco                             | 30.2 (29, 31.4)   | 17.1 (16, 18.2)   | 45 (43.1, 46.8)   |
| Current/past user                              | 28.3 (27.3, 29.3) | 14.4 (13.4, 15.4) | 40.5 (39, 42)     |
| <b>Alcohol use</b>                             |                   |                   |                   |
| Never consumed                                 | 31 (30, 31.9)     | 17.2 (16.3, 18.1) | 44.9 (43.5, 46.3) |
| Less than once a month in past 3 months        | 23.5 (21.8, 25.2) | 11.6 (9.8, 13.3)  | 35.1 (32.2, 37.9) |
| One to three days per month or more frequently | 18.1 (16.2, 19.9) | 9 (7.4, 10.5)     | 29.6 (26, 33.1)   |



|                                                        |                   |                   |                   |
|--------------------------------------------------------|-------------------|-------------------|-------------------|
| <b>Caste</b>                                           |                   |                   |                   |
| Scheduled caste                                        | 29.9 (28.5, 31.4) | 17.9 (16.3, 19.5) | 42.9 (40.6, 45.2) |
| Scheduled tribe                                        | 23.9 (22.1, 25.7) | 12.9 (11.2, 14.6) | 36.6 (33.5, 39.8) |
| Other backward class                                   | 30 (28.4, 31.6)   | 15.5 (14.1, 16.8) | 44.8 (42.5, 47.1) |
| None of the above/No caste or tribe/Don't know/Missing | 30.2 (29.1, 31.3) | 17.2 (16, 18.5)   | 42.5 (40.8, 44.2) |
| <b>Religion</b>                                        |                   |                   |                   |
| Hindu                                                  | 29.1 (28.2, 30.1) | 15.4 (14.6, 16.2) | 43.1 (41.6, 44.5) |
| Muslim                                                 | 34.4 (32.2, 36.6) | 23.4 (20, 26.7)   | 46.1 (43.3, 49)   |
| Christian                                              | 24 (19.5, 28.4)   | 10.5 (6.7, 14.3)  | 39.2 (34.7, 43.7) |
| Other                                                  | 28.2 (25.4, 31.1) | 16.4 (13.1, 19.7) | 39.3 (35, 43.6)   |
| <b>Region</b>                                          |                   |                   |                   |
| North                                                  | 23.6 (22.5, 24.8) | 12 (10.8, 13.2)   | 34.9 (33.1, 36.8) |
| Central                                                | 27.2 (25.7, 28.6) | 14.4 (12.9, 15.8) | 40 (37.7, 42.3)   |
| East                                                   | 33.2 (31.9, 34.5) | 20.5 (19, 22.1)   | 45.7 (43.7, 47.7) |
| Northeast                                              | 19.8 (18.3, 21.2) | 8.8 (7.5, 10.1)   | 34.7 (32.1, 37.3) |
| West                                                   | 32.2 (30.6, 33.8) | 18.6 (16.8, 20.3) | 45 (42.5, 47.6)   |
| South                                                  | 30.6 (27.8, 33.5) | 15.2 (13, 17.5)   | 47.9 (43.9, 51.9) |

Numbers presented in table are weighted, using national-level individual sampling weights provided in data.

\* MPCE: monthly per capita expenditure which is defined as total monthly household consumption expenditure divided by household size. It includes household's per capita spending on food and non-food items including spending on health, education, utilities, etc.

† Includes Temporarily laid off, on sick or other leave, or in job training

§ Household food unavailability in the past 12 months, where household members either reduced their meal size, did not eat even though they were hungry, or did not eat for a whole day because enough food was not available in the household.

**S6 Table. Sex differences in distribution of frailty deficit scores.**

|                                                              | 45-59 years           |                     | 60-plus years         |                     |
|--------------------------------------------------------------|-----------------------|---------------------|-----------------------|---------------------|
|                                                              | Female, N =<br>18,717 | Male, N =<br>15,381 | Female, N =<br>16,366 | Male, N =<br>15,098 |
| <b>Self-reported general Health</b>                          |                       |                     |                       |                     |
| 0 (very good)                                                | 851 (4.6%)            | 1,167 (7.6%)        | 416 (2.6%)            | 616 (4.2%)          |
| 0.25 (good)                                                  | 7,280 (39%)           | 7,076 (46%)         | 4,418 (28%)           | 4,854 (33%)         |
| 0.5 (fair)                                                   | 8,003 (43%)           | 5,540 (36%)         | 7,160 (45%)           | 6,221 (42%)         |
| 0.75 (poor)                                                  | 2,265 (12%)           | 1,342 (8.8%)        | 3,541 (22%)           | 2,663 (18%)         |
| 1 (very poor)                                                | 195 (1.0%)            | 138 (0.9%)          | 485 (3.0%)            | 424 (2.9%)          |
| <b>Self-reported medically diagnosed conditions</b>          |                       |                     |                       |                     |
| Arthritis                                                    | 1,568 (8.4%)          | 704 (4.6%)          | 1,833 (11%)           | 1,222 (8.1%)        |
| Stroke                                                       | 128 (0.7%)            | 225 (1.5%)          | 347 (2.1%)            | 495 (3.3%)          |
| Angina                                                       | 1,313 (7.0%)          | 656 (4.3%)          | 1,232 (7.5%)          | 804 (5.3%)          |
| Diabetes                                                     | 1,968 (11%)           | 1,601 (10%)         | 2,416 (15%)           | 2,444 (16%)         |
| COPD                                                         | 116 (0.6%)            | 143 (0.9%)          | 213 (1.3%)            | 252 (1.7%)          |
| Asthma                                                       | 482 (2.6%)            | 414 (2.7%)          | 792 (4.8%)            | 873 (5.8%)          |
| Depression                                                   | 1,278 (6.9%)          | 732 (4.8%)          | 1,162 (7.3%)          | 886 (6.0%)          |
| Hypertension                                                 | 7,758 (42%)           | 6,058 (40%)         | 9,524 (58%)           | 7,803 (52%)         |
| Cataract                                                     | 1,027 (5.5%)          | 553 (3.6%)          | 3,646 (22%)           | 2,862 (19%)         |
| <b>Medical symptoms</b>                                      |                       |                     |                       |                     |
| Bodily aches or pains                                        | 5,300 (28%)           | 2,751 (18%)         | 5,331 (33%)           | 3,660 (24%)         |
| Problem with sleeping                                        | 2,060 (11%)           | 1,369 (8.9%)        | 2,449 (15%)           | 1,908 (13%)         |
| Difficulty with distance vision                              |                       |                     |                       |                     |
| 0                                                            | 1,255 (6.7%)          | 1,559 (10%)         | 542 (3.3%)            | 786 (5.2%)          |
| 0.25                                                         | 8,181 (44%)           | 7,683 (50%)         | 4,716 (29%)           | 5,206 (35%)         |
| 0.5                                                          | 7,340 (39%)           | 5,011 (33%)         | 7,311 (45%)           | 6,329 (42%)         |
| 0.75                                                         | 1,772 (9.5%)          | 991 (6.5%)          | 3,318 (20%)           | 2,391 (16%)         |
| 1                                                            | 106 (0.6%)            | 90 (0.6%)           | 444 (2.7%)            | 326 (2.2%)          |
| Difficulty with near vision                                  |                       |                     |                       |                     |
| 0                                                            | 922 (4.9%)            | 1,105 (7.2%)        | 520 (3.2%)            | 715 (4.8%)          |
| 0.25                                                         | 7,019 (38%)           | 6,310 (41%)         | 4,477 (27%)           | 4,937 (33%)         |
| 0.5                                                          | 7,962 (43%)           | 5,803 (38%)         | 7,646 (47%)           | 6,613 (44%)         |
| 0.75                                                         | 2,580 (14%)           | 1,970 (13%)         | 3,228 (20%)           | 2,420 (16%)         |
| 1                                                            | 156 (0.8%)            | 140 (0.9%)          | 436 (2.7%)            | 340 (2.3%)          |
| <b>Functional assessment (difficulty with the following)</b> |                       |                     |                       |                     |
| Walking 100 yards                                            | 3,103 (17%)           | 1,381 (9.0%)        | 6,250 (38%)           | 4,048 (27%)         |
| Sitting for 2 hours or more                                  | 4,717 (25%)           | 2,385 (16%)         | 7,270 (45%)           | 4,815 (32%)         |
| Getting up from a chair after sitting for long period        | 5,087 (27%)           | 2,559 (17%)         | 7,894 (48%)           | 5,387 (36%)         |
| Climbing one flight of stairs without resting                | 6,870 (37%)           | 3,350 (22%)         | 10,060 (62%)          | 7,148 (48%)         |

|                                                                         |              |              |              |              |
|-------------------------------------------------------------------------|--------------|--------------|--------------|--------------|
| Stooping, kneeling or crouching                                         | 7,445 (40%)  | 3,838 (25%)  | 10,144 (62%) | 7,483 (50%)  |
| Reaching or extending arms above shoulder level (either arm)            | 1,819 (9.8%) | 964 (6.3%)   | 3,944 (24%)  | 2,390 (16%)  |
| Pulling or pushing large objects                                        | 6,027 (32%)  | 2,717 (18%)  | 9,583 (59%)  | 6,471 (43%)  |
| Lifting or carrying weights over 5 kilos, like a heavy bag of groceries | 3,583 (19%)  | 1,419 (9.3%) | 7,439 (46%)  | 4,374 (29%)  |
| Picking up a coin from a table                                          | 563 (3.0%)   | 296 (1.9%)   | 1,950 (12%)  | 1,220 (8.1%) |
| <b>ADL/IADL* limitations (difficulty with the following)</b>            |              |              |              |              |
| Dressing, including putting on chappals, shoes, etc                     | 440 (2.4%)   | 292 (1.9%)   | 1,282 (7.9%) | 891 (5.9%)   |
| Walking across a room                                                   | 380 (2.0%)   | 208 (1.4%)   | 1,339 (8.2%) | 888 (5.9%)   |
| Bathing                                                                 | 326 (1.7%)   | 249 (1.6%)   | 1,318 (8.1%) | 926 (6.2%)   |
| Eating                                                                  | 390 (2.1%)   | 237 (1.5%)   | 1,394 (8.5%) | 924 (6.2%)   |
| Getting in or out of bed                                                | 864 (4.6%)   | 395 (2.6%)   | 2,024 (12%)  | 1,286 (8.6%) |
| Using the toilet, including getting up and down                         | 1,265 (6.8%) | 630 (4.1%)   | 2,868 (18%)  | 1,987 (13%)  |
| Preparing a hot meal (cooking and serving)                              | 810 (4.3%)   | 669 (4.4%)   | 2,963 (18%)  | 2,212 (15%)  |
| Shopping for groceries                                                  | 1,551 (8.3%) | 630 (4.1%)   | 4,323 (26%)  | 2,361 (16%)  |
| Making telephone calls                                                  | 2,966 (16%)  | 969 (6.3%)   | 5,270 (32%)  | 2,838 (19%)  |
| Taking medications                                                      | 1,194 (6.4%) | 486 (3.2%)   | 2,803 (17%)  | 1,515 (10%)  |
| Doing work around the house or garden                                   | 1,728 (9.3%) | 700 (4.6%)   | 4,598 (28%)  | 2,765 (18%)  |
| Managing money, such as paying bills and keeping track of expenses      | 2,468 (13%)  | 604 (3.9%)   | 5,127 (31%)  | 2,283 (15%)  |
| Getting around or finding address in unfamiliar place                   | 3,041 (16%)  | 726 (4.7%)   | 5,677 (35%)  | 2,437 (16%)  |
| <b>Any form of mental impairment</b>                                    | 266 (1.4%)   | 199 (1.3%)   | 431 (2.6%)   | 326 (2.2%)   |
| <b>Body mass index</b>                                                  |              |              |              |              |
| 0 (normal)                                                              | 8,197 (48%)  | 7,967 (58%)  | 7,118 (49%)  | 7,590 (56%)  |
| 0.5 (underweight/overweight)                                            | 4,531 (26%)  | 3,136 (23%)  | 2,936 (20%)  | 2,249 (17%)  |
| 1 (obese)                                                               | 4,461 (26%)  | 2,731 (20%)  | 4,487 (31%)  | 3,670 (27%)  |
| <b>Weak grip strength</b>                                               | 7,279 (43%)  | 6,807 (49%)  | 10,265 (71%) | 10,962 (82%) |
| <b>Slow gait speed</b>                                                  | 83 (0.5%)    | 48 (0.3%)    | 807 (5.7%)   | 351 (2.6%)   |

\*ADL: Activities of Daily Living; IADL: Instrumental Activities of Daily Living

**S7 Table. Sex-specific associations between frailty and adverse outcomes.**

| Outcome                        | 45-59 years         |                       |                              | 60-plus years       |                       |                              |
|--------------------------------|---------------------|-----------------------|------------------------------|---------------------|-----------------------|------------------------------|
|                                | Male<br>OR (95% CI) | Female<br>OR (95% CI) | Female:Male<br>ROR (95% CI)* | Male<br>OR (95% CI) | Female<br>OR (95% CI) | Female:Male<br>ROR (95% CI)* |
| Hospitalized in last 12 months | 2.22 (1.91, 2.58)   | 2.6 (2.11, 3.21)      | 1.17 (0.91, 1.52)            | 2.13 (1.84, 2.46)   | 2.27 (1.97, 2.61)     | 1.07 (0.87, 1.31)            |
| Fallen down in last 2 years    | 2.15 (1.96, 2.37)   | 2.17 (1.86, 2.54)     | 1.01 (0.84, 1.21)            | 1.75 (1.6, 1.91)    | 2.06 (1.86, 2.29)     | 1.18 (1.03, 1.35)            |
| Poor cognition                 | 1.29 (1.1, 1.5)     | 1.44 (1.00, 2.06)     | 1.12 (0.75, 1.66)            | 1.35 (1.19, 1.52)   | 1.56 (1.31, 1.86)     | 1.16 (0.93, 1.44)            |

\*ROR, ratio of odds ratios, indicating the sex difference in the relationship between frailty and adverse outcomes. For example, odds ratios of 2.6 and 2.22 for females and males, respectively, and a female:male ROR of 1.17 for hospitalization indicates that odds of hospitalization are higher for frail adults in both sexes, but the relative increase is 17% higher in females.

**S8 Table. Summary of different frailty measures, by sex and age groups.**

|         | Frailty index        |                      |                      | Frail: frailty index $\geq 0.25$ |                      |                      | Frail: frailty index $> 0.21$ |                      |                      | Frail: Frailty index based on non-missing deficits* $\geq 0.25$ |                      |                      |
|---------|----------------------|----------------------|----------------------|----------------------------------|----------------------|----------------------|-------------------------------|----------------------|----------------------|-----------------------------------------------------------------|----------------------|----------------------|
|         | 45-59 years          | 60-plus years        | Overall              | 45-59 years                      | 60-plus years        | Overall              | 45-59 years                   | 60-plus years        | Overall              | 45-59 years                                                     | 60-plus years        | Overall              |
|         | (N=30568)            | (N=27081)            | (N=57649)            | (N=30568)                        | (N=27081)            | (N=57649)            | (N=30568)                     | (N=27081)            | (N=57649)            | (N=33674)                                                       | (N=30657)            | (N=64331)            |
| Overall | 0.14<br>(0.14, 0.15) | 0.24<br>(0.24, 0.25) | 0.19<br>(0.19, 0.2)  | 16.2<br>(15.4, 16.9)             | 43.2<br>(41.9, 44.4) | 29.5<br>(28.7, 30.4) | 22.6<br>(21.7, 23.6)          | 52.2<br>(51, 53.4)   | 37.2<br>(36.4, 38.1) | 16.7<br>(15.7, 17.7)                                            | 44.5<br>(43.3, 45.6) | 30.5<br>(29.7, 31.4) |
| Male    | 0.12<br>(0.12, 0.12) | 0.21<br>(0.21, 0.22) | 0.17<br>(0.16, 0.17) | 9.6 (8.5, 10.6)                  | 33.2<br>(31.8, 34.6) | 21.7<br>(20.8, 22.7) | 13.8<br>(12.7, 15)            | 42.2<br>(40.7, 43.6) | 28.4<br>(27.3, 29.4) | 10.8<br>(8.9, 12.6)                                             | 34.8<br>(33.4, 36.1) | 23.1<br>(22, 24.2)   |
| Female  | 0.17<br>(0.16, 0.17) | 0.27<br>(0.27, 0.28) | 0.22<br>(0.21, 0.22) | 21.4<br>(20.2, 22.6)             | 52.2<br>(50.4, 54.1) | 36.1<br>(34.9, 37.4) | 29.6<br>(28.2, 31)            | 61.3<br>(59.6, 63)   | 44.8<br>(43.5, 46.1) | 21.5<br>(20.3, 22.6)                                            | 53.1<br>(51.5, 54.8) | 36.8<br>(35.6, 38)   |

\*Frailty index for an individual was calculated by summing the non-missing health deficit scores and then dividing by the total number of deficits measured in that individual (up to 3 were allowed to be missing). CI: confidence interval

**S9 Table. Association (OR(95% CI)) between frailty (alternative definitions) and adverse outcomes.**

| Outcome                           | Frail: frailty index > 0.21 |                       | Frail: Frailty index based on non-missing deficits* ≥ 0.25 |                       |
|-----------------------------------|-----------------------------|-----------------------|------------------------------------------------------------|-----------------------|
|                                   | 45-59 years (N= 30568)      | ≥ 60 years (N= 27081) | 45-59 years (N33674)                                       | ≥ 60 years (N= 30657) |
| Hospitalization in last 12 months | 2.26 (2.02, 2.53)           | 2.11 (1.9, 2.33)      | 2.58 (2.31, 2.88)                                          | 2.37 (2.16, 2.6)      |
| Any fall in last 2 years          | 1.99 (1.85, 2.14)           | 1.88 (1.76, 2.01)     | 2.18 (2.02, 2.36)                                          | 1.97 (1.85, 2.09)     |
| Poor cognition                    | 1.99 (1.85, 2.14)           | 1.35 (1.22, 1.5)      | 1.35 (1.19, 1.55)                                          | 1.42 (1.3, 1.56)      |

\*Frailty index for an individual was calculated by summing the non-missing health deficit scores and then dividing by the total number of deficits measured in that individual (up to 3 were allowed to be missing).

**S10 Table. Distribution of frailty deficit scores in middle-aged and older adults, frail and overall.**

|                                                     | 45-59 years  |             | 60-plus years |             |
|-----------------------------------------------------|--------------|-------------|---------------|-------------|
|                                                     | Overall      | Frail       | Overall       | Frail       |
|                                                     | N = 34,098   | N = 4,302   | N = 31,464    | N = 10,580  |
| <b>Self-reported general Health</b>                 |              |             |               |             |
| 0 (very good)                                       | 2,018 (6.0%) | 59 (1.4%)   | 1,032 (3.4%)  | 123 (1.2%)  |
| 0.25 (good)                                         | 14,356 (42%) | 677 (16%)   | 9,272 (30%)   | 1,697 (16%) |
| 0.5 (fair)                                          | 13,543 (40%) | 2,063 (48%) | 13,381 (43%)  | 4,740 (45%) |
| 0.75 (poor)                                         | 3,607 (11%)  | 1,331 (31%) | 6,204 (20%)   | 3,490 (33%) |
| 1 (very poor)                                       | 333 (1.0%)   | 172 (4.0%)  | 909 (3.0%)    | 530 (5.0%)  |
| <b>Self-reported medically diagnosed conditions</b> |              |             |               |             |
| Arthritis                                           | 2,272 (6.7%) | 869 (20%)   | 3,055 (9.7%)  | 1,765 (17%) |
| Stroke                                              | 353 (1.0%)   | 126 (2.9%)  | 842 (2.7%)    | 433 (4.1%)  |
| Angina                                              | 1,969 (5.8%) | 679 (16%)   | 2,036 (6.5%)  | 1,122 (11%) |
| Diabetes                                            | 3,569 (10%)  | 826 (19%)   | 4,860 (15%)   | 2,058 (19%) |
| COPD                                                | 259 (0.8%)   | 81 (1.9%)   | 465 (1.5%)    | 233 (2.2%)  |
| Asthma                                              | 896 (2.6%)   | 280 (6.5%)  | 1,665 (5.3%)  | 860 (8.1%)  |
| Depression                                          | 2,010 (6.0%) | 719 (17%)   | 2,048 (6.7%)  | 1,198 (11%) |
| Hypertension                                        | 13,816 (41%) | 2,440 (57%) | 17,327 (55%)  | 6,895 (65%) |
| Cataract                                            | 1,580 (4.6%) | 473 (11%)   | 6,508 (21%)   | 3,101 (29%) |
| <b>Medical symptoms</b>                             |              |             |               |             |
| Bodily aches or pains                               | 8,051 (24%)  | 2,352 (55%) | 8,991 (29%)   | 4,749 (45%) |
| Problem with sleeping                               | 3,429 (10%)  | 1,171 (27%) | 4,357 (14%)   | 2,428 (23%) |
| Difficulty with distance vision                     |              |             |               |             |
| 0                                                   | 2,814 (8.3%) | 187 (4.3%)  | 1,328 (4.2%)  | 243 (2.3%)  |
| 0.25                                                | 15,864 (47%) | 1,329 (31%) | 9,922 (32%)   | 2,297 (22%) |

|                                                                               |              |             |              |             |
|-------------------------------------------------------------------------------|--------------|-------------|--------------|-------------|
| 0.5                                                                           | 12,351 (36%) | 1,917 (45%) | 13,640 (43%) | 4,736 (45%) |
| 0.75                                                                          | 2,763 (8.1%) | 806 (19%)   | 5,709 (18%)  | 2,880 (27%) |
| 1                                                                             | 196 (0.6%)   | 63 (1.5%)   | 770 (2.5%)   | 424 (4.0%)  |
| Difficulty with near vision                                                   |              |             |              |             |
| 0                                                                             | 2,027 (6.0%) | 138 (3.2%)  | 1,235 (3.9%) | 236 (2.2%)  |
| 0.25                                                                          | 13,329 (39%) | 1,077 (25%) | 9,414 (30%)  | 2,266 (21%) |
| 0.5                                                                           | 13,765 (41%) | 1,976 (46%) | 14,259 (46%) | 4,961 (47%) |
| 0.75                                                                          | 4,550 (13%)  | 1,025 (24%) | 5,648 (18%)  | 2,711 (26%) |
| 1                                                                             | 296 (0.9%)   | 86 (2.0%)   | 776 (2.5%)   | 406 (3.8%)  |
| <b>Functional assessment<br/>(difficulty with the<br/>following)</b>          |              |             |              |             |
| Walking 100 yards                                                             | 4,484 (13%)  | 2,385 (55%) | 10,298 (33%) | 6,501 (61%) |
| Sitting for 2 hours or more                                                   | 7,102 (21%)  | 3,206 (75%) | 12,085 (39%) | 7,545 (71%) |
| Getting up from a chair<br>after sitting for long period                      | 7,646 (23%)  | 3,371 (78%) | 13,281 (42%) | 8,115 (77%) |
| Climbing one flight of<br>stairs without resting                              | 10,220 (30%) | 3,839 (89%) | 17,208 (55%) | 9,556 (90%) |
| Stooping, kneeling or<br>crouching                                            | 11,283 (33%) | 3,850 (89%) | 17,627 (56%) | 9,409 (89%) |
| Reaching or extending<br>arms above shoulder level<br>(either arm)            | 2,783 (8.2%) | 1,581 (37%) | 6,334 (20%)  | 4,202 (40%) |
| Pulling or pushing large<br>objects                                           | 8,744 (26%)  | 3,475 (81%) | 16,054 (51%) | 9,039 (85%) |
| Lifting or carrying weights<br>over 5 kilos, like a heavy<br>bag of groceries | 5,002 (15%)  | 2,538 (59%) | 11,813 (38%) | 7,367 (70%) |
| Picking up a coin from a<br>table                                             | 859 (2.5%)   | 506 (12%)   | 3,170 (10%)  | 1,959 (19%) |
| <b>ADL/IADL* limitations<br/>(difficulty with the<br/>following)</b>          |              |             |              |             |
| Dressing, including putting<br>on chappals, shoes, etc                        | 732 (2.2%)   | 416 (9.7%)  | 2,173 (6.9%) | 1,152 (11%) |
| Walking across a room                                                         | 588 (1.7%)   | 359 (8.3%)  | 2,227 (7.1%) | 1,217 (12%) |
| Bathing                                                                       | 575 (1.7%)   | 351 (8.2%)  | 2,244 (7.2%) | 1,239 (12%) |
| Eating                                                                        | 627 (1.8%)   | 370 (8.6%)  | 2,318 (7.4%) | 1,378 (13%) |
| Getting in or out of bed                                                      | 1,259 (3.7%) | 829 (19%)   | 3,310 (11%)  | 2,122 (20%) |
| Using the toilet, including<br>getting up and down                            | 1,895 (5.6%) | 1,151 (27%) | 4,855 (15%)  | 3,133 (30%) |
| Preparing a hot meal<br>(cooking and serving)                                 | 1,479 (4.4%) | 820 (19%)   | 5,175 (17%)  | 3,377 (32%) |
| Shopping for groceries                                                        | 2,181 (6.4%) | 1,234 (29%) | 6,684 (21%)  | 4,566 (43%) |
| Making telephone calls                                                        | 3,935 (12%)  | 1,397 (32%) | 8,108 (26%)  | 4,778 (45%) |
| Taking medications                                                            | 1,680 (4.9%) | 875 (20%)   | 4,318 (14%)  | 2,773 (26%) |
| Doing work around the<br>house or garden                                      | 2,428 (7.2%) | 1,460 (34%) | 7,363 (23%)  | 5,032 (48%) |
| Managing money, such as<br>paying bills and keeping<br>track of expenses      | 3,072 (9.0%) | 1,494 (35%) | 7,410 (24%)  | 4,883 (46%) |

|                                                       |              |             |              |             |
|-------------------------------------------------------|--------------|-------------|--------------|-------------|
| Getting around or finding address in unfamiliar place | 3,767 (11%)  | 1,655 (38%) | 8,114 (26%)  | 5,221 (49%) |
| <b>Any form of mental impairment</b>                  | 465 (1.4%)   | 155 (3.6%)  | 757 (2.4%)   | 365 (3.4%)  |
| <b>Body mass index</b>                                |              |             |              |             |
| 0 (normal)                                            | 16,164 (52%) | 1,732 (40%) | 14,708 (52%) | 4,841 (46%) |
| 0.5 (underweight/overweight)                          | 7,667 (25%)  | 1,192 (28%) | 5,185 (18%)  | 2,071 (20%) |
| 1 (obese)                                             | 7,192 (23%)  | 1,378 (32%) | 8,157 (29%)  | 3,668 (35%) |
| <b>Weak grip strength</b>                             | 14,086 (46%) | 2,675 (62%) | 21,227 (76%) | 9,046 (86%) |
| <b>Slow gait speed</b>                                | 131 (0.4%)   | 70 (1.6%)   | 1,158 (4.2%) | 917 (8.7%)  |

\*ADL: Activities of Daily Living; IADL: Instrumental Activities of Daily Living

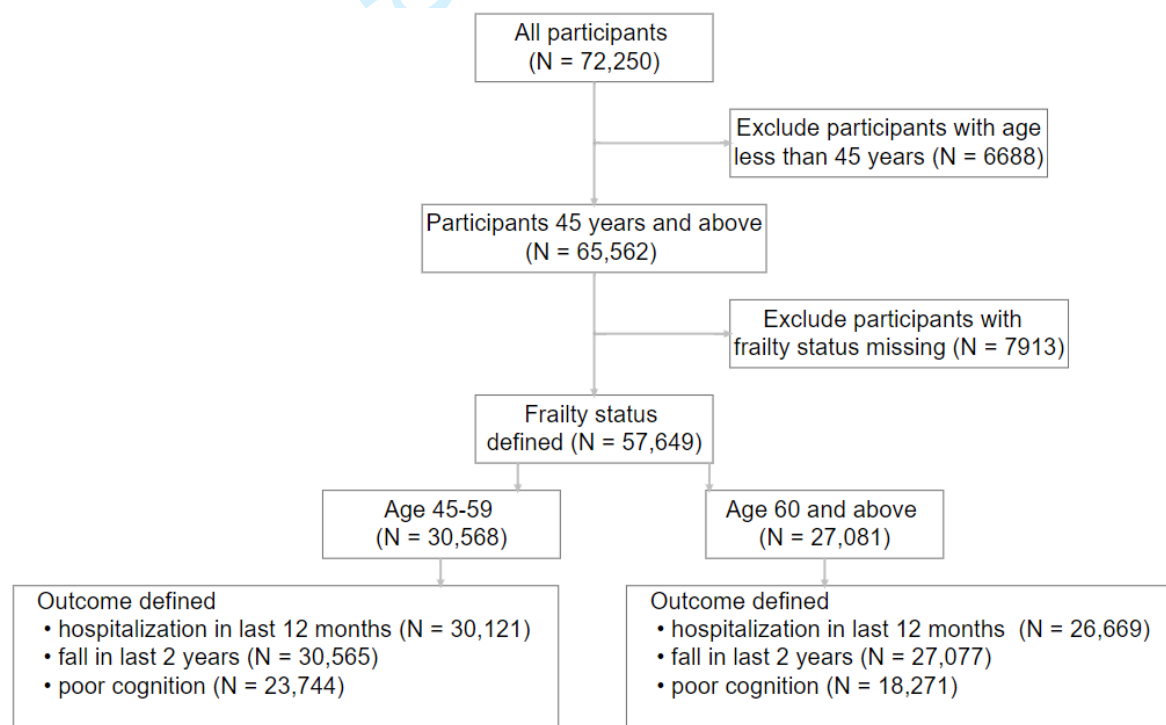

**S1 Fig. Flowchart presenting selection of participants for analyses.**

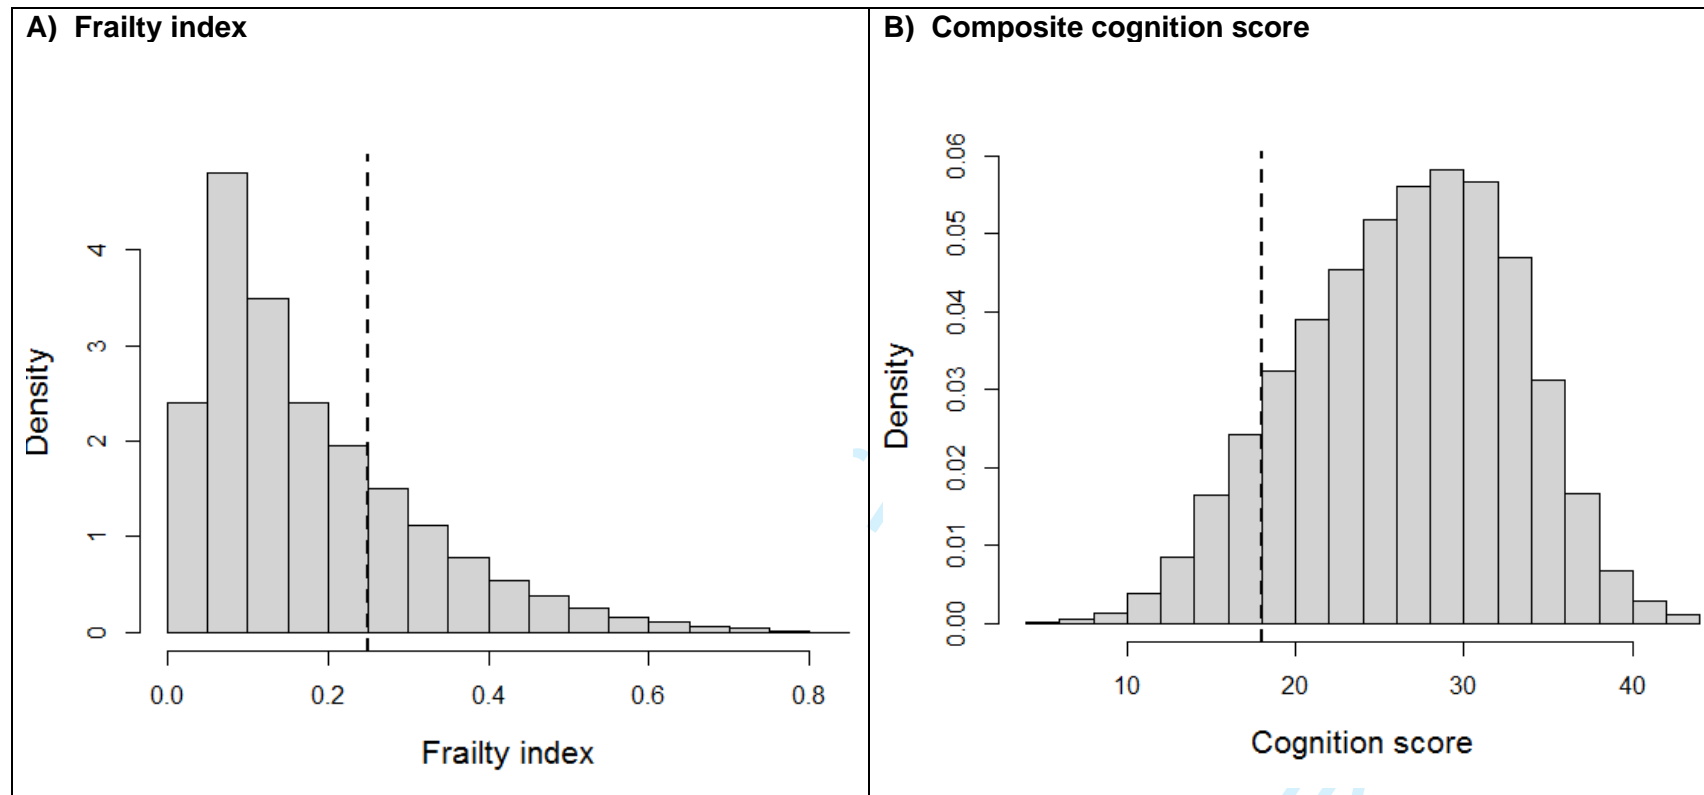

**S2 Fig. Distribution of frailty index and cognition score among 45-plus participants.** A) Frailty index had a mean value of 0.18 and standard deviation (SD) of 0.13, with values ranging from 0-0.83 and a median (IQR) of 0.14 (0.08, 0.25). The dotted line presents the cut-off 0.25. B) Composite cognition score value ranges from 4 to 43, with a mean of 27.01 (SD=6.36) and a median of 27 (IQR = 22,32). Poor cognition is defined as cognition score  $\leq 18$  (10<sup>th</sup> percentile marked as dotted line in the graph).



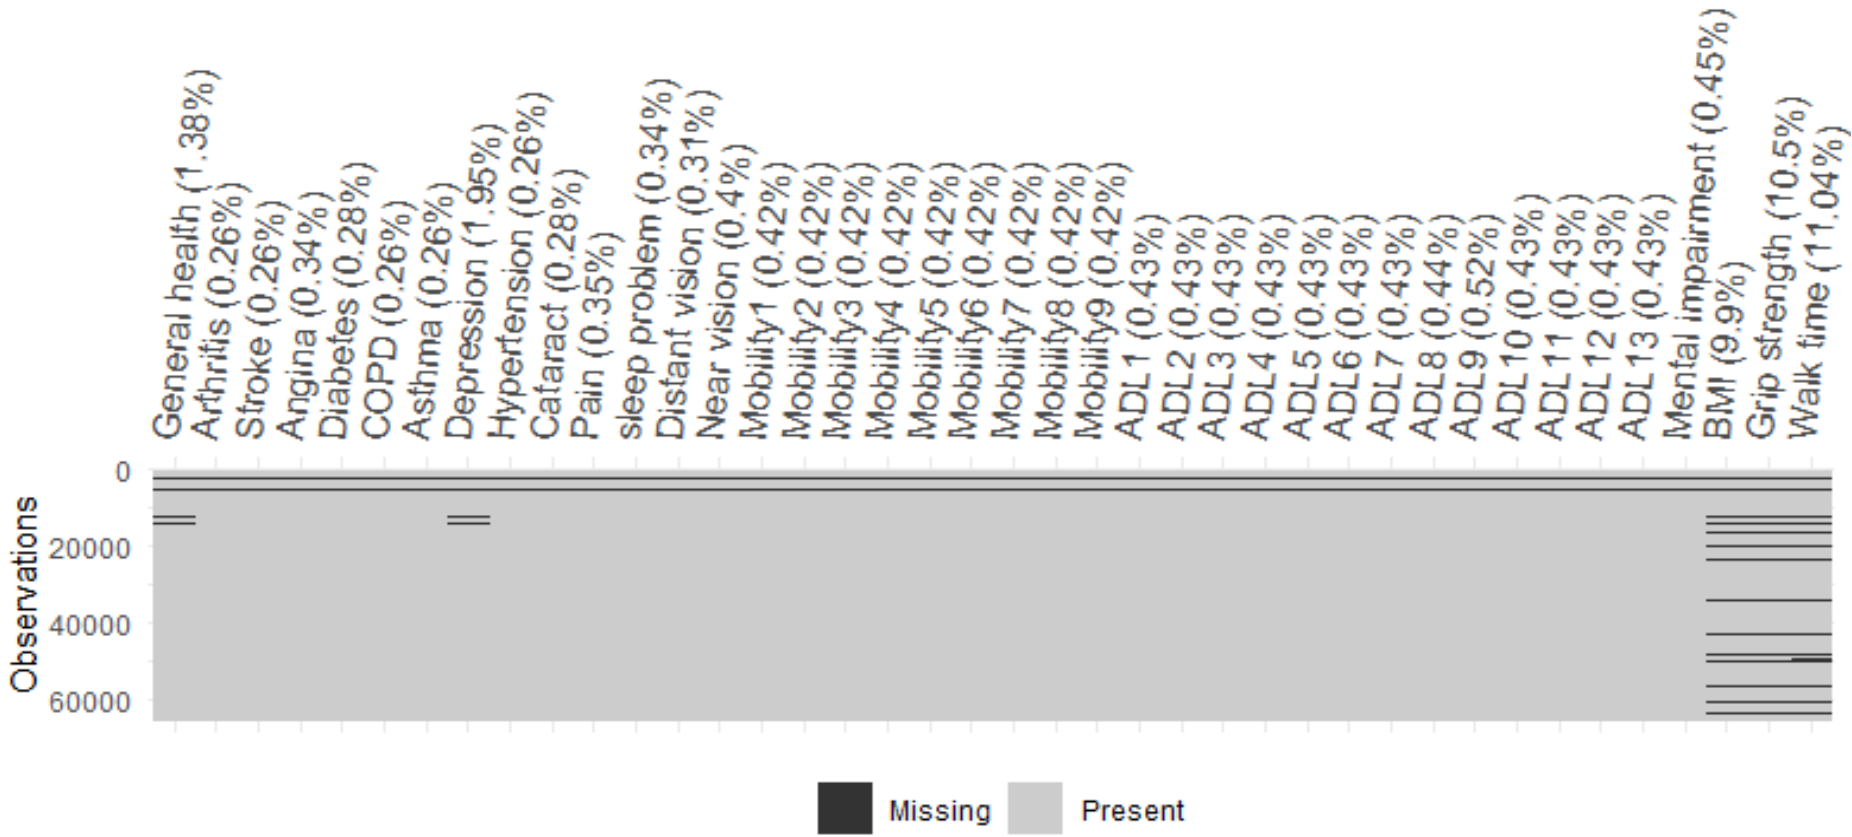

**S3 Fig. Missingness in deficit scores.** BMI:Body mass index; Mobility1:Walking 100 yards; Mobility2:Sitting for 2 hours or more; Mobility3:Getting up from a chair after sitting for long period; Mobility4:Climbing one flight of stairs without resting ; Mobility5:Stooping, kneeling or crouching; Mobility6:Reaching or extending arms above shoulder level (either arm); Mobility7:Pulling or pushing large objects; Mobility8:Lifting or carrying weights over 5 kilos, like a heavy bag of groceries; Mobility9:Picking up a coin from a table; Activities of Daily Living (ADL) 1:Dressing, including putting on chappals, shoes, etc.; ADL2:Walking across a room; ADL3:Bathing; ADL4:Eating; ADL5:Getting in or out of bed; ADL6:Using the toilet, including getting up and down; ADL7:Preparing a hot meal (cooking and serving); ADL8:Shopping for groceries; ADL9:Making telephone calls; ADL10:Taking medications; ADL11:Doing work around the house or garden; ADL12:Managing money, such as paying bills and keeping track of expenses; ADL13:Getting around or finding address in unfamiliar place.

Female 45-59 years

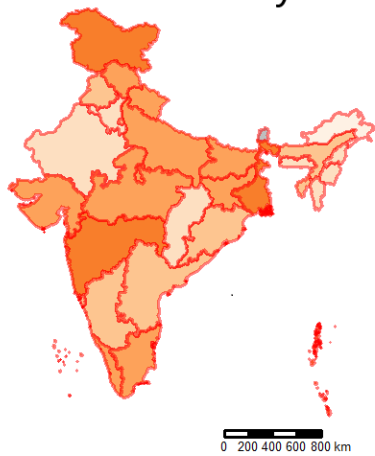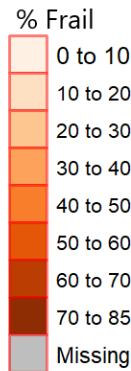

Male 45-59 years

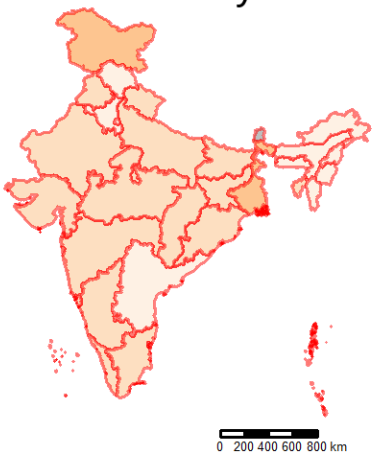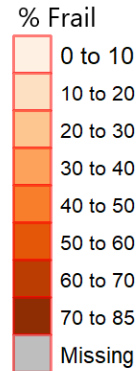

Female 60-plus years

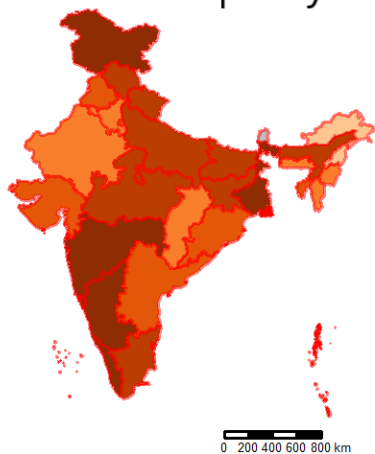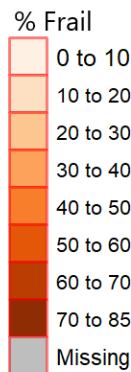

Male 60-plus years

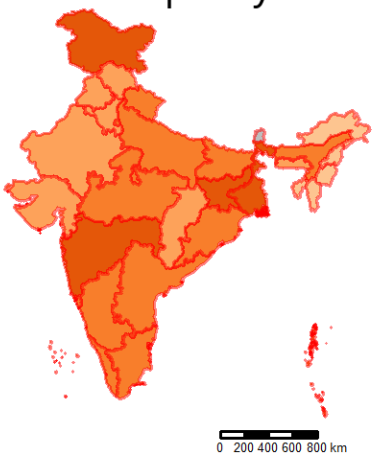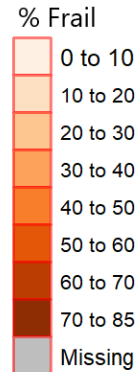

**S4 Fig. Prevalence of frailty across states, in middle-aged and elderly men and women.** Individuals with frailty index > 0.21 were considered as frail. Prevalence estimates are weighted, using state-level individual sampling weights provided in data.

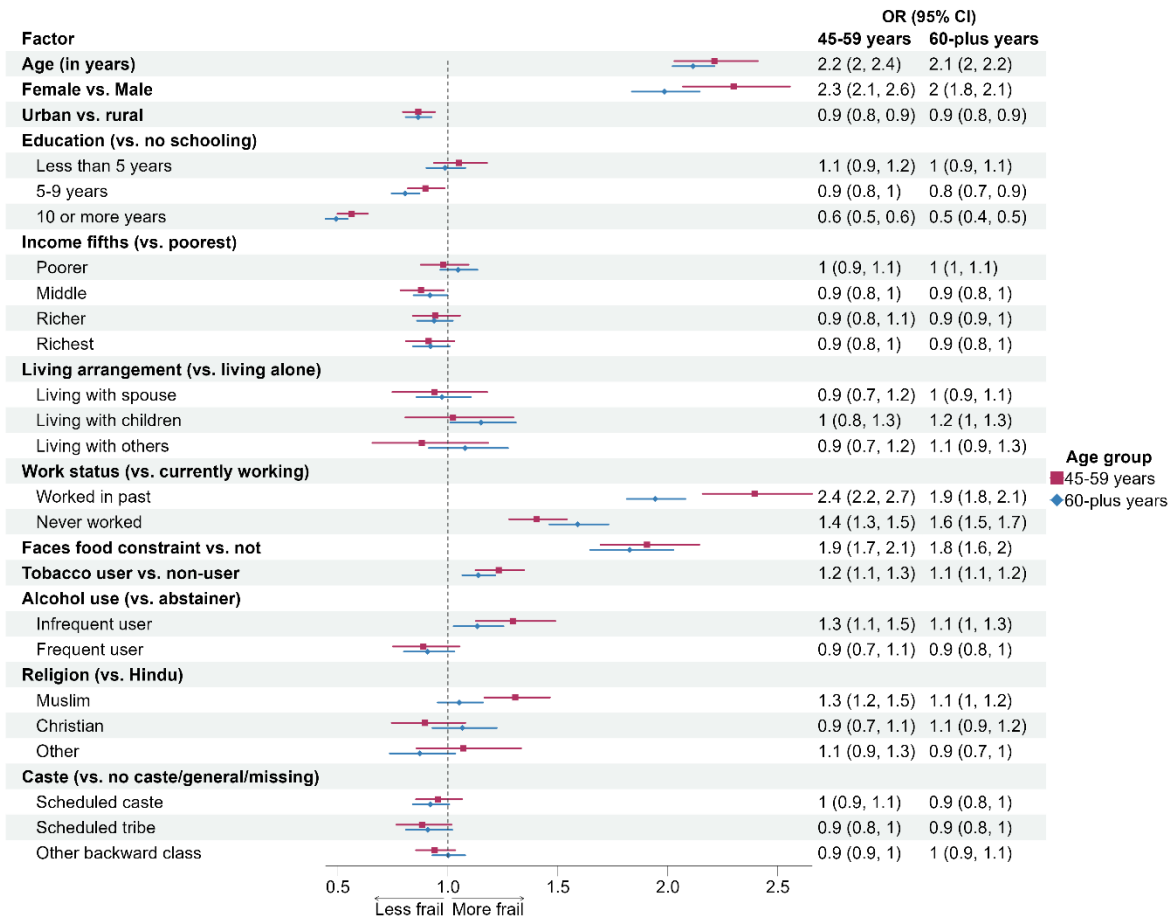

**S5 Fig. Forest plot of adjusted odds ratios (95% CI) for frailty, by participants' background characteristics, using income as the economic indicator.** Annual per capita household income is used as the economic indicator, instead of monthly per capita consumption expenditure. Per capita household income is computed by aggregating income from all sources (agricultural and non-agricultural business, wage/salary, pension and transfers) and dividing by the number of household members.

STROBE Statement—Checklist of items that should be included in reports of *cross-sectional studies*

|                              | Item No | Recommendation                                                                                                                                                                       | Page No                                                                         |
|------------------------------|---------|--------------------------------------------------------------------------------------------------------------------------------------------------------------------------------------|---------------------------------------------------------------------------------|
| : Title and abstract         | 1       | (a) Indicate the study's design with a commonly used term in the title or the abstract                                                                                               | Abstract Methods (page 2)                                                       |
|                              |         | (b) Provide in the abstract an informative and balanced summary of what was done and what was found                                                                                  | Abstract Methods, Results (page 2)                                              |
| <b>Introduction</b>          |         |                                                                                                                                                                                      |                                                                                 |
| Background/rationale         | 2       | Explain the scientific background and rationale for the investigation being reported                                                                                                 | Background paragraphs 1-3 (pages 4-5)                                           |
| Objectives                   | 3       | State specific objectives, including any prespecified hypotheses                                                                                                                     | Background paragraph 4 (page 5)                                                 |
| <b>Methods</b>               |         |                                                                                                                                                                                      |                                                                                 |
| Study design                 | 4       | Present key elements of study design early in the paper                                                                                                                              | Methods subsection <i>Data</i> (page 5)                                         |
| Setting                      | 5       | Describe the setting, locations, and relevant dates, including periods of recruitment, exposure, follow-up, and data collection                                                      | Methods subsection <i>Data</i> (page 5)                                         |
| Participants                 | 6       | (a) Give the eligibility criteria, and the sources and methods of selection of participants                                                                                          | Methods subsection <i>Data</i> (page 5) and S1 Fig                              |
| Variables                    | 7       | Clearly define all outcomes, exposures, predictors, potential confounders, and effect modifiers. Give diagnostic criteria, if applicable                                             | Methods subsection <i>Variables</i> (pages 6-7)                                 |
| Data sources/<br>measurement | 8*      | For each variable of interest, give sources of data and details of methods of assessment (measurement). Describe comparability of assessment methods if there is more than one group | Methods subsection <i>Variables</i> (pages 6-7) and S1-S3 Tables                |
| Bias                         | 9       | Describe any efforts to address potential sources of bias                                                                                                                            | Methods subsection <i>Statistical analysis</i> (pages 7-8)                      |
| Study size                   | 10      | Explain how the study size was arrived at                                                                                                                                            | Methods subsection <i>Data</i> (page 5) and S1 Fig, S4 Table                    |
| Quantitative variables       | 11      | Explain how quantitative variables were handled in the analyses. If applicable, describe which groupings were chosen and why                                                         | Methods subsection <i>Statistical analysis</i> , (pages 7-8)                    |
| Statistical methods          | 12      | (a) Describe all statistical methods, including those used to control for confounding                                                                                                | Methods subsection <i>Statistical analysis</i> , (pages 7-8)                    |
|                              |         | (b) Describe any methods used to examine subgroups and interactions                                                                                                                  | Methods subsection <i>Statistical analysis</i> , (pages 7-8)                    |
|                              |         | (c) Explain how missing data were addressed                                                                                                                                          | Methods subsection <i>Variables</i> (pages 6-7)<br>Table 1 (pages 9-10), S3 Fig |

|                   |     |                                                                                                                                                                                                              |                                                                                                |
|-------------------|-----|--------------------------------------------------------------------------------------------------------------------------------------------------------------------------------------------------------------|------------------------------------------------------------------------------------------------|
|                   |     | (d) If applicable, describe analytical methods taking account of sampling strategy                                                                                                                           | Methods subsection<br><i>Statistical analysis</i> ,<br>(pages 7-8)                             |
|                   |     | (e) Describe any sensitivity analyses                                                                                                                                                                        | Methods subsection<br><i>Variables</i> (pages 6-7)                                             |
| <b>Results</b>    |     |                                                                                                                                                                                                              |                                                                                                |
| Participants      | 13* | (a) Report numbers of individuals at each stage of study—eg numbers potentially eligible, examined for eligibility, confirmed eligible, included in the study, completing follow-up, and analysed            | Results paragraph 1<br>(pages 8-9), S4 Table                                                   |
|                   |     | (b) Give reasons for non-participation at each stage                                                                                                                                                         | S1 Fig                                                                                         |
|                   |     | (c) Consider use of a flow diagram                                                                                                                                                                           | S1 Fig                                                                                         |
| Descriptive data  | 14* | (a) Give characteristics of study participants (eg demographic, clinical, social) and information on exposures and potential confounders                                                                     | Results paragraph 1<br>(pages 8-9), Table 1<br>(pages 9-10)                                    |
|                   |     | (b) Indicate number of participants with missing data for each variable of interest                                                                                                                          | Table 1 (pages 9-10),<br>Table 2 (page 13), S1<br>Table, S3 Table, S4<br>Table, S3 Fig         |
| Outcome data      | 15* | Report numbers of outcome events or summary measures                                                                                                                                                         | S2 Fig panel A, S5<br>Table, Table 2 (page 13),<br>Table 3                                     |
| Main results      | 16  | (a) Give unadjusted estimates and, if applicable, confounder-adjusted estimates and their precision (eg, 95% confidence interval). Make clear which confounders were adjusted for and why they were included | Table 2 (page 13), Table<br>3 (page 15), Fig 2                                                 |
|                   |     | (b) Report category boundaries when continuous variables were categorized                                                                                                                                    | Table 2 (page 13), Table<br>3 (page 15), Fig 2                                                 |
|                   |     | (c) If relevant, consider translating estimates of relative risk into absolute risk for a meaningful time period                                                                                             | NA                                                                                             |
| Other analyses    | 17  | Report other analyses done—eg analyses of subgroups and interactions, and sensitivity analyses                                                                                                               | Results subsections <i>Sex differences</i> and<br><i>Sensitivity analyses</i><br>(pages 16-17) |
| <b>Discussion</b> |     |                                                                                                                                                                                                              |                                                                                                |
| Key results       | 18  | Summarise key results with reference to study objectives                                                                                                                                                     | Box 1 (page17) and<br>Discussion para 1<br>(page17)                                            |
| Limitations       | 19  | Discuss limitations of the study, taking into account sources of potential bias or imprecision. Discuss both direction and magnitude of any potential bias                                                   | Discussion para 6 (page<br>20)                                                                 |
| Interpretation    | 20  | Give a cautious overall interpretation of results considering objectives, limitations, multiplicity of analyses, results from similar studies, and other relevant evidence                                   | Conclusion (page 21)                                                                           |

|                          |    |                                                                                                                                                               |                                                  |
|--------------------------|----|---------------------------------------------------------------------------------------------------------------------------------------------------------------|--------------------------------------------------|
| Generalisability         | 21 | Discuss the generalisability (external validity) of the study results                                                                                         | Discussion para 2-6 (pages 18-20)                |
| <b>Other information</b> |    |                                                                                                                                                               |                                                  |
| Funding                  | 22 | Give the source of funding and the role of the funders for the present study and, if applicable, for the original study on which the present article is based | Declarations subsection <i>Funding</i> (page 22) |

\*Give information separately for exposed and unexposed groups.

**Note:** An Explanation and Elaboration article discusses each checklist item and gives methodological background and published examples of transparent reporting. The STROBE checklist is best used in conjunction with this article (freely available on the Web sites of PLoS Medicine at <http://www.plosmedicine.org/>, Annals of Internal Medicine at <http://www.annals.org/>, and Epidemiology at <http://www.epidem.com/>). Information on the STROBE Initiative is available at [www.strobe-statement.org](http://www.strobe-statement.org).
