# Supplementary material for: Frailty among middle-aged and older women and men in India: findings from wave 1 of the longitudinal Ageing study in India
Source: PubMed Central journal article supplement — BMJ Open. 2023 Jul 31;13(7):e071842. doi: 10.1136/bmjopen-2023-071842 (PMC10391831; doi:10.1136/bmjopen-2023-071842), 2023-07-31
Supplement: bmjopen-2023-071842supp001.pdf [file bmjopen-2023-071842supp001.pdf]

## Frailty among middle-aged and older women and men in India: Findings from Wave 1 of the Longitudinal Aging Study in India

### Supplementary Table & Figure legends

**S1 Table. Construction of deficits-based frailty index and distribution of deficit scores.**

**S2 Table. Definition of outcomes – hospitalization in last 12 months and any fall in past 2 years.**

**S3 Table. Construction of cognition score and distribution of its components.**

**S4 Table. Characteristics of excluded participants and participants included in various analyses.**

**S5 Table. Prevalence of frailty, overall and by participants' background characteristics.**

**S6 Table. Sex differences in distribution of frailty deficit scores.**

**S7 Table. Sex-specific associations between frailty and adverse outcomes.**

**S8 Table. Summary of different frailty measures, by sex and age groups.**

**S9 Table. Association between frailty (alternative definitions) and adverse outcomes.**

**S10 Table. Distribution of frailty deficit scores in middle-aged and older adults, frail and overall.**

**S1 Fig. Flowchart presenting selection of participants for analyses.**

**S2 Fig. Distribution of frailty index and cognition score among 45-plus participants. A)** Frailty index had a mean value of 0.18 and standard deviation (SD) of 0.13, with values ranging from 0-0.83 and a median (IQR) of 0.14 (0.08, 0.25). The dotted line presents the cut-off 0.25. **B)** Composite cognition score value ranges from 4 to 43, with a mean of 27.01 (SD=6.36) and a median of 27 (IQR = 22,32). Poor cognition is defined as cognition score  $\leq$  18 (10<sup>th</sup> percentile marked as dotted line in the graph).

**S3 Fig. Missingness in deficit scores.** Mobility1:Walking 100 yards; Mobility2:Sitting for 2 hours or more; Mobility3:Getting up from a chair after sitting for long period; Mobility4:Climbing one flight of stairs without resting ; Mobility5:Stooping, kneeling or crouching; Mobility6:Reaching or extending arms above shoulder level (either arm); Mobility7:Pulling or pushing large objects; Mobility8:Lifting or carrying weights over 5 kilos, like a heavy bag of groceries; Mobility9:Picking up a coin from a table; Activities of Daily Living (ADL) 1:Dressing, including putting on chappals, shoes, etc.; ADL2:Walking across a room; ADL3:Bathing; ADL4:Eating; ADL5:Getting in or out of bed; ADL6:Using the toilet, including getting up and down; ADL7:Preparing a hot meal (cooking and serving); ADL8:Shopping for groceries; ADL9:Making telephone calls; ADL10:Taking medications; ADL11:Doing work around the house or garden; ADL12:Managing money, such as paying

bills and keeping track of expenses; ADL13: Getting around or finding address in unfamiliar place.

**S4 Fig. Prevalence of frailty across states, in middle-aged and elderly men and women.** Individuals with frailty index > 0.21 were considered as frail. Prevalence estimates are weighted, using state-level individual sampling weights provided in data.

**S5 Fig. Forest plot of adjusted odds ratios (95% CI) for frailty, by participants' background characteristics, using income as the economic indicator.** Annual per capita household income is used as the economic indicator, instead of monthly per capita consumption expenditure. Per capita household income is computed by aggregating income from all sources (agricultural and non-agricultural business, wage/salary, pension and transfers) and dividing by the number of household members.

**S1 Table. Construction of deficits-based frailty index and distribution of deficit scores.**

| Domain/variable                                                  | Coding criteria                                                     | Questions                                                                                                                                                                                                                                                                                                                                                              | Distribution in adults 45 years or older* (N=65562) |               |
|------------------------------------------------------------------|---------------------------------------------------------------------|------------------------------------------------------------------------------------------------------------------------------------------------------------------------------------------------------------------------------------------------------------------------------------------------------------------------------------------------------------------------|-----------------------------------------------------|---------------|
|                                                                  |                                                                     |                                                                                                                                                                                                                                                                                                                                                                        | Value                                               | N (%)         |
| <b>General Health (Self-reported health) (1 deficit)</b>         | Very good = 0, Good = 0.25, Fair = 0.50, Poor = 0.75, Very poor = 1 | 1. Now I want to ask you about your general health. Overall, how is your health in general? Would you say it is very good, good, fair, poor, or very poor?<br>1. Very good<br>2. Good<br>3. Fair<br>4. Poor<br>5. Very poor                                                                                                                                            | Value                                               | N (%)         |
|                                                                  |                                                                     |                                                                                                                                                                                                                                                                                                                                                                        | 0                                                   | 3050 (4.65)   |
|                                                                  |                                                                     |                                                                                                                                                                                                                                                                                                                                                                        | 0.25                                                | 23628 (36.04) |
|                                                                  |                                                                     |                                                                                                                                                                                                                                                                                                                                                                        | 0.5                                                 | 26924 (41.07) |
|                                                                  |                                                                     |                                                                                                                                                                                                                                                                                                                                                                        | 0.75                                                | 9811 (14.96)  |
|                                                                  |                                                                     |                                                                                                                                                                                                                                                                                                                                                                        | 1                                                   | 1242 (1.89)   |
| Missing                                                          | 7 (1.38)                                                            |                                                                                                                                                                                                                                                                                                                                                                        |                                                     |               |
| <b>Self-reported medically diagnosed conditions (9 deficits)</b> |                                                                     |                                                                                                                                                                                                                                                                                                                                                                        |                                                     |               |
| (1) Arthritis                                                    | 1 if Yes to 1. and selected a. in 2.<br>0 otherwise                 | 1. Has any health professional ever diagnosed you with the following chronic conditions or diseases?<br>Arthritis or rheumatism, Osteoporosis or other bone/joint diseases.<br>1. Yes<br>2. No<br><br>2. Have you ever been diagnosed with the following bone/joint diseases/problems?<br>a. Arthritis<br>b. Rheumatism<br>c. Osteoporosis<br>d. Other, please specify | Value                                               | N (%)         |
|                                                                  |                                                                     |                                                                                                                                                                                                                                                                                                                                                                        | 0                                                   | 60065 (91.62) |
|                                                                  |                                                                     |                                                                                                                                                                                                                                                                                                                                                                        | 1                                                   | 5327 (8.13)   |
|                                                                  |                                                                     |                                                                                                                                                                                                                                                                                                                                                                        | Missing                                             | 170 (0.26)    |
| (2) Stroke                                                       | 1 if Yes to 1.<br>0 otherwise                                       | 1. Has any health professional ever diagnosed you with the following chronic conditions or diseases?<br>Stroke<br>1. Yes<br>2. No                                                                                                                                                                                                                                      | Value                                               | N (%)         |
|                                                                  |                                                                     |                                                                                                                                                                                                                                                                                                                                                                        | 0                                                   | 64195 (97.91) |
|                                                                  |                                                                     |                                                                                                                                                                                                                                                                                                                                                                        | 1                                                   | 1195 (1.82)   |
|                                                                  |                                                                     |                                                                                                                                                                                                                                                                                                                                                                        | Missing                                             | 172 (0.26)    |

|            |                                                                                                                                                                                                                                                                                                                                                                                    |                                                                                                                                                                                                                                                                                                                                                                                                                                                                                                                                                                                                                                                                                                                                                |         |               |
|------------|------------------------------------------------------------------------------------------------------------------------------------------------------------------------------------------------------------------------------------------------------------------------------------------------------------------------------------------------------------------------------------|------------------------------------------------------------------------------------------------------------------------------------------------------------------------------------------------------------------------------------------------------------------------------------------------------------------------------------------------------------------------------------------------------------------------------------------------------------------------------------------------------------------------------------------------------------------------------------------------------------------------------------------------------------------------------------------------------------------------------------------------|---------|---------------|
| (3) Angina | Angina is defined based on symptoms.                                                                                                                                                                                                                                                                                                                                               | <b>Rose angina questionnaire:</b> <sup>1</sup>                                                                                                                                                                                                                                                                                                                                                                                                                                                                                                                                                                                                                                                                                                 | Value   | N (%)         |
|            |                                                                                                                                                                                                                                                                                                                                                                                    |                                                                                                                                                                                                                                                                                                                                                                                                                                                                                                                                                                                                                                                                                                                                                | 0       | 61336 (93.55) |
|            |                                                                                                                                                                                                                                                                                                                                                                                    |                                                                                                                                                                                                                                                                                                                                                                                                                                                                                                                                                                                                                                                                                                                                                | 1       | 4005 (6.11)   |
|            |                                                                                                                                                                                                                                                                                                                                                                                    |                                                                                                                                                                                                                                                                                                                                                                                                                                                                                                                                                                                                                                                                                                                                                | Missing | 221 (0.34)    |
|            | Individuals classified as having angina were those who had a history of chest pain (answer "Yes" to question 1), set off by physical exertion (answer "Yes" to questions 2 or 3), forcing them to stop or slow down (question 4), with subsequent relief ("Yes" to question 5), within 10 minutes (question 6), and located in the sternum or the left anterior chest and left arm | <p>1. Do you ever have any pain or discomfort in your chest?</p> <p>1. Yes<br/>2. No</p> <p>2. Do you get this pain or discomfort when you walk uphill or hurry?</p> <p>1. Yes<br/>2. No<br/>3. Unable to walk</p> <p>3. Do you get it when you walk at an ordinary pace on the level?</p> <p>1. Yes<br/>2. No</p> <p>4. When you get any pain or discomfort in your chest while walking or moving, what do you do?</p> <p>1. Stop<br/>2. Slow down<br/>3. Continue at the same pace</p> <p>5. Does it go away when you stop moving?</p> <p>1. Yes<br/>2. No</p> <p>6. How quickly the pain subsides when it occurs?</p> <p>1. 10 minutes or less<br/>2. More than 10 minutes</p> <p>7. Where do you get this pain or discomfort? (figure)</p> |         |               |

|              | (quadrants 4, 8, or 5 and 6 in question 7).<br><br>1 if Yes to above conditions specified.<br>0 otherwise |                                                                                                                                                                                                                                                                                                                                                                                                                                         |                                                                                                                                                                                                                                                 |       |       |   |               |   |              |         |            |
|--------------|-----------------------------------------------------------------------------------------------------------|-----------------------------------------------------------------------------------------------------------------------------------------------------------------------------------------------------------------------------------------------------------------------------------------------------------------------------------------------------------------------------------------------------------------------------------------|-------------------------------------------------------------------------------------------------------------------------------------------------------------------------------------------------------------------------------------------------|-------|-------|---|---------------|---|--------------|---------|------------|
| (4) Diabetes | 1 if Yes to 1.<br>0 otherwise                                                                             | 1. Has any health professional ever diagnosed you with the following chronic conditions or diseases?<br>Diabetes<br>1. Yes<br>2. No                                                                                                                                                                                                                                                                                                     | <table border="1"> <thead> <tr> <th>Value</th> <th>N (%)</th> </tr> </thead> <tbody> <tr> <td>0</td> <td>56952 (86.87)</td> </tr> <tr> <td>1</td> <td>8429 (12.86)</td> </tr> <tr> <td>Missing</td> <td>181 (0.28)</td> </tr> </tbody> </table> | Value | N (%) | 0 | 56952 (86.87) | 1 | 8429 (12.86) | Missing | 181 (0.28) |
| Value        | N (%)                                                                                                     |                                                                                                                                                                                                                                                                                                                                                                                                                                         |                                                                                                                                                                                                                                                 |       |       |   |               |   |              |         |            |
| 0            | 56952 (86.87)                                                                                             |                                                                                                                                                                                                                                                                                                                                                                                                                                         |                                                                                                                                                                                                                                                 |       |       |   |               |   |              |         |            |
| 1            | 8429 (12.86)                                                                                              |                                                                                                                                                                                                                                                                                                                                                                                                                                         |                                                                                                                                                                                                                                                 |       |       |   |               |   |              |         |            |
| Missing      | 181 (0.28)                                                                                                |                                                                                                                                                                                                                                                                                                                                                                                                                                         |                                                                                                                                                                                                                                                 |       |       |   |               |   |              |         |            |
| (5) COPD     | 1 if Yes to 1. and selected a. in 2.<br>0 otherwise                                                       | 1. Has any health professional ever diagnosed you with the following chronic conditions or diseases?<br>Chronic lung disease such as asthma, chronic obstructive pulmonary disease/Chronic bronchitis or other chronic lung problems.<br>1. Yes<br>2. No<br><br>2. Which type of chronic lung disease do you have?<br>a. Chronic obstructive pulmonary disease (COPD)<br>b. Chronic Bronchitis<br>c. Asthma<br>d. Other, please specify | <table border="1"> <thead> <tr> <th>Value</th> <th>N (%)</th> </tr> </thead> <tbody> <tr> <td>0</td> <td>64667 (98.63)</td> </tr> <tr> <td>1</td> <td>724 (1.10)</td> </tr> <tr> <td>Missing</td> <td>171 (0.26)</td> </tr> </tbody> </table>   | Value | N (%) | 0 | 64667 (98.63) | 1 | 724 (1.10)   | Missing | 171 (0.26) |
| Value        | N (%)                                                                                                     |                                                                                                                                                                                                                                                                                                                                                                                                                                         |                                                                                                                                                                                                                                                 |       |       |   |               |   |              |         |            |
| 0            | 64667 (98.63)                                                                                             |                                                                                                                                                                                                                                                                                                                                                                                                                                         |                                                                                                                                                                                                                                                 |       |       |   |               |   |              |         |            |
| 1            | 724 (1.10)                                                                                                |                                                                                                                                                                                                                                                                                                                                                                                                                                         |                                                                                                                                                                                                                                                 |       |       |   |               |   |              |         |            |
| Missing      | 171 (0.26)                                                                                                |                                                                                                                                                                                                                                                                                                                                                                                                                                         |                                                                                                                                                                                                                                                 |       |       |   |               |   |              |         |            |
| (6) Asthma   | 1 if Yes to 1. and selected c. in 2.<br>0 otherwise                                                       | 1. Has any health professional ever diagnosed you with the following chronic conditions or diseases?<br>Chronic lung disease such as asthma, chronic obstructive pulmonary disease/Chronic bronchitis or other chronic lung problems.<br>1. Yes<br>2. No<br><br>2. Which type of chronic lung disease do you have?                                                                                                                      | <table border="1"> <thead> <tr> <th>Value</th> <th>N (%)</th> </tr> </thead> <tbody> <tr> <td>0</td> <td>62830 (95.83)</td> </tr> <tr> <td>1</td> <td>2561 (3.91)</td> </tr> <tr> <td>Missing</td> <td>171 (0.26)</td> </tr> </tbody> </table>  | Value | N (%) | 0 | 62830 (95.83) | 1 | 2561 (3.91)  | Missing | 171 (0.26) |
| Value        | N (%)                                                                                                     |                                                                                                                                                                                                                                                                                                                                                                                                                                         |                                                                                                                                                                                                                                                 |       |       |   |               |   |              |         |            |
| 0            | 62830 (95.83)                                                                                             |                                                                                                                                                                                                                                                                                                                                                                                                                                         |                                                                                                                                                                                                                                                 |       |       |   |               |   |              |         |            |
| 1            | 2561 (3.91)                                                                                               |                                                                                                                                                                                                                                                                                                                                                                                                                                         |                                                                                                                                                                                                                                                 |       |       |   |               |   |              |         |            |
| Missing      | 171 (0.26)                                                                                                |                                                                                                                                                                                                                                                                                                                                                                                                                                         |                                                                                                                                                                                                                                                 |       |       |   |               |   |              |         |            |

|                |                                                                                                                                                                                                                                                                                                                                                                                           | <p>a. Chronic obstructive pulmonary disease (COPD)</p> <p>b. Chronic Bronchitis</p> <p>c. Asthma</p> <p>d. Other, please specify</p>                                                                                                                                                                                                                                                                                                                                                                                                                                                                                                                                                                                                                                                                                                                                                                                                                                                  |                                                                                                                                                                                                                                                 |       |       |   |               |   |             |         |             |
|----------------|-------------------------------------------------------------------------------------------------------------------------------------------------------------------------------------------------------------------------------------------------------------------------------------------------------------------------------------------------------------------------------------------|---------------------------------------------------------------------------------------------------------------------------------------------------------------------------------------------------------------------------------------------------------------------------------------------------------------------------------------------------------------------------------------------------------------------------------------------------------------------------------------------------------------------------------------------------------------------------------------------------------------------------------------------------------------------------------------------------------------------------------------------------------------------------------------------------------------------------------------------------------------------------------------------------------------------------------------------------------------------------------------|-------------------------------------------------------------------------------------------------------------------------------------------------------------------------------------------------------------------------------------------------|-------|-------|---|---------------|---|-------------|---------|-------------|
| (7) Depression | <p>Depression is defined based on symptoms using CIDI scale.</p> <p>a) Calculated appetite status:<br/>1 if Yes to either 6. or 7.<br/>0 otherwise</p> <p>b) Calculated CIDI score:<br/>1 is summation of 4, 5, appetite status, 8, 9, 10, 11</p> <p>c) Finally, depression status:<br/>1 if 1. is Yes &amp; selected either 1. or 2. category from 2. &amp; selected either 1. or 2.</p> | <p>1. During the last 12 months, was there ever a time when you felt sad, blue, or depressed for two weeks or more in a row?</p> <p>1. Yes<br/>2. No</p> <p>2. Please think of the two-week period during the last 12 months when these feelings were worst. During that time did the feelings of being sad, blue, or depressed usually last all day long, most of the day, about half the day, or less than half the day?</p> <p>1. All day long<br/>2. Most of the day<br/>3. About half the day<br/>4. Less than half the day</p> <p>3. During those two weeks, did you feel this way every day, almost every day, or less often than that?</p> <p>1. Every day<br/>2. Almost every day<br/>3. Less often</p> <p>Thinking about those same two weeks,</p> <p>4. Did you lose interest in most things?</p> <p>1. Yes<br/>2. No</p> <p>5. Did you ever feel more tired out or low in energy than is usual for you?</p> <p>1. Yes<br/>2. No</p> <p>6. Did you lose your appetite?</p> | <table border="1"> <thead> <tr> <th>Value</th> <th>N (%)</th> </tr> </thead> <tbody> <tr> <td>0</td> <td>60228 (91.86)</td> </tr> <tr> <td>1</td> <td>4058 (6.19)</td> </tr> <tr> <td>Missing</td> <td>1276 (1.95)</td> </tr> </tbody> </table> | Value | N (%) | 0 | 60228 (91.86) | 1 | 4058 (6.19) | Missing | 1276 (1.95) |
| Value          | N (%)                                                                                                                                                                                                                                                                                                                                                                                     |                                                                                                                                                                                                                                                                                                                                                                                                                                                                                                                                                                                                                                                                                                                                                                                                                                                                                                                                                                                       |                                                                                                                                                                                                                                                 |       |       |   |               |   |             |         |             |
| 0              | 60228 (91.86)                                                                                                                                                                                                                                                                                                                                                                             |                                                                                                                                                                                                                                                                                                                                                                                                                                                                                                                                                                                                                                                                                                                                                                                                                                                                                                                                                                                       |                                                                                                                                                                                                                                                 |       |       |   |               |   |             |         |             |
| 1              | 4058 (6.19)                                                                                                                                                                                                                                                                                                                                                                               |                                                                                                                                                                                                                                                                                                                                                                                                                                                                                                                                                                                                                                                                                                                                                                                                                                                                                                                                                                                       |                                                                                                                                                                                                                                                 |       |       |   |               |   |             |         |             |
| Missing        | 1276 (1.95)                                                                                                                                                                                                                                                                                                                                                                               |                                                                                                                                                                                                                                                                                                                                                                                                                                                                                                                                                                                                                                                                                                                                                                                                                                                                                                                                                                                       |                                                                                                                                                                                                                                                 |       |       |   |               |   |             |         |             |

|                  | category from 3. & CIDI score is $\geq 3$ . 0 otherwise                                                                                                                   | <p>1. Yes<br/>2. No</p> <p>7. Did your appetite increase during those same two weeks?<br/>1. Yes<br/>2. No</p> <p>8. During the same two-week period did you have a lot more trouble concentrating than usual?<br/>1. Yes<br/>2. No</p> <p>9. People sometimes feel down on themselves, and no good or worthless. During that two-week period, did you feel this way?<br/>1. Yes<br/>2. No</p> <p>10. Did you think a lot about death – either your own, someone else’s, or death in general – during those two weeks?<br/>1. Yes<br/>2. No</p> <p>11. Did you have more trouble falling asleep than you usually do during those two weeks?<br/>1. Yes<br/>2. No</p> |                                                                                                                                                                                                                                                  |       |       |   |               |   |               |         |            |
|------------------|---------------------------------------------------------------------------------------------------------------------------------------------------------------------------|----------------------------------------------------------------------------------------------------------------------------------------------------------------------------------------------------------------------------------------------------------------------------------------------------------------------------------------------------------------------------------------------------------------------------------------------------------------------------------------------------------------------------------------------------------------------------------------------------------------------------------------------------------------------|--------------------------------------------------------------------------------------------------------------------------------------------------------------------------------------------------------------------------------------------------|-------|-------|---|---------------|---|---------------|---------|------------|
| (8) Hypertension | <p>Hypertension is defined as either self-reported or BP <math>\geq 140/90</math></p> <p>1 if Yes to 1. or 2. is <math>\geq 140</math> or 3. is <math>\geq 90</math>,</p> | <p>1. Has any health professional ever diagnosed you with the following chronic conditions or diseases?<br/>Hypertension or high blood pressure.<br/>1. Yes<br/>2. No</p> <p>When the device is in the correct position and the R is relaxed, press the button to Start. Measure blood pressure and pulse three times with one minute gap between each of the measurements. No need to</p>                                                                                                                                                                                                                                                                           | <table border="1"> <thead> <tr> <th>Value</th> <th>N (%)</th> </tr> </thead> <tbody> <tr> <td>0</td> <td>34246 (52.23)</td> </tr> <tr> <td>1</td> <td>31143 (47.50)</td> </tr> <tr> <td>Missing</td> <td>173 (0.26)</td> </tr> </tbody> </table> | Value | N (%) | 0 | 34246 (52.23) | 1 | 31143 (47.50) | Missing | 173 (0.26) |
| Value            | N (%)                                                                                                                                                                     |                                                                                                                                                                                                                                                                                                                                                                                                                                                                                                                                                                                                                                                                      |                                                                                                                                                                                                                                                  |       |       |   |               |   |               |         |            |
| 0                | 34246 (52.23)                                                                                                                                                             |                                                                                                                                                                                                                                                                                                                                                                                                                                                                                                                                                                                                                                                                      |                                                                                                                                                                                                                                                  |       |       |   |               |   |               |         |            |
| 1                | 31143 (47.50)                                                                                                                                                             |                                                                                                                                                                                                                                                                                                                                                                                                                                                                                                                                                                                                                                                                      |                                                                                                                                                                                                                                                  |       |       |   |               |   |               |         |            |
| Missing          | 173 (0.26)                                                                                                                                                                |                                                                                                                                                                                                                                                                                                                                                                                                                                                                                                                                                                                                                                                                      |                                                                                                                                                                                                                                                  |       |       |   |               |   |               |         |            |

|                                        | 0 otherwise                                             | remove the cuffs and the device between the measurements. Record measurements in CAPI. Enter 993 in systolic, diastolic and pulse reading if an unresolvable equipment problem occurs. If the average systolic reading obtained is greater than 180 and average diastolic reading is greater than 110 or either of it, fill the referral letter and give to respondent and stop the test immediately.<br><br>2. Systolic readings: average of last two readings.<br>3. Diastolic readings: average of last two readings. |                                                                                                                                                                                                                                                  |       |       |   |               |   |               |         |            |
|----------------------------------------|---------------------------------------------------------|--------------------------------------------------------------------------------------------------------------------------------------------------------------------------------------------------------------------------------------------------------------------------------------------------------------------------------------------------------------------------------------------------------------------------------------------------------------------------------------------------------------------------|--------------------------------------------------------------------------------------------------------------------------------------------------------------------------------------------------------------------------------------------------|-------|-------|---|---------------|---|---------------|---------|------------|
| (9) Cataract                           | 1 if Yes to 1. and selected b. in 2.<br>0 otherwise     | 1. Now I have some questions about your eyesight. Have you ever been diagnosed with any eye or vision problem or condition, including ordinary near sightedness or farsightedness?<br>1. Yes<br>2. No<br><br>2. With which problem or condition were you diagnosed?<br>a. Presbyopia<br>b. Cataract<br>c. Glaucoma<br>d. Myopia (Nearsightedness)<br>e. Hypermetropia (Farsightedness)<br>f. Other, please specify                                                                                                       | <table border="1"> <thead> <tr> <th>Value</th> <th>N (%)</th> </tr> </thead> <tbody> <tr> <td>0</td> <td>57291 (87.38)</td> </tr> <tr> <td>1</td> <td>8088 (12.34)</td> </tr> <tr> <td>Missing</td> <td>183 (0.28)</td> </tr> </tbody> </table>  | Value | N (%) | 0 | 57291 (87.38) | 1 | 8088 (12.34)  | Missing | 183 (0.28) |
| Value                                  | N (%)                                                   |                                                                                                                                                                                                                                                                                                                                                                                                                                                                                                                          |                                                                                                                                                                                                                                                  |       |       |   |               |   |               |         |            |
| 0                                      | 57291 (87.38)                                           |                                                                                                                                                                                                                                                                                                                                                                                                                                                                                                                          |                                                                                                                                                                                                                                                  |       |       |   |               |   |               |         |            |
| 1                                      | 8088 (12.34)                                            |                                                                                                                                                                                                                                                                                                                                                                                                                                                                                                                          |                                                                                                                                                                                                                                                  |       |       |   |               |   |               |         |            |
| Missing                                | 183 (0.28)                                              |                                                                                                                                                                                                                                                                                                                                                                                                                                                                                                                          |                                                                                                                                                                                                                                                  |       |       |   |               |   |               |         |            |
| <b>Medical symptoms (4 deficits)</b>   |                                                         |                                                                                                                                                                                                                                                                                                                                                                                                                                                                                                                          |                                                                                                                                                                                                                                                  |       |       |   |               |   |               |         |            |
| 1) Bodily aches or pains did you have? | 1 if Yes to 1. & Either a., b., c. in 2.<br>0 otherwise | 1. Are you often troubled with pain?<br>1. Yes<br>2. No<br><br>2. Do you take any medication or therapy to get relief from the pain [Multiple answers are allowed]?<br>a. Yes, analgesics (Oral/ Injectable)                                                                                                                                                                                                                                                                                                             | <table border="1"> <thead> <tr> <th>Value</th> <th>N (%)</th> </tr> </thead> <tbody> <tr> <td>0</td> <td>48290 (73.66)</td> </tr> <tr> <td>1</td> <td>17042 (25.99)</td> </tr> <tr> <td>Missing</td> <td>230 (0.35)</td> </tr> </tbody> </table> | Value | N (%) | 0 | 48290 (73.66) | 1 | 17042 (25.99) | Missing | 230 (0.35) |
| Value                                  | N (%)                                                   |                                                                                                                                                                                                                                                                                                                                                                                                                                                                                                                          |                                                                                                                                                                                                                                                  |       |       |   |               |   |               |         |            |
| 0                                      | 48290 (73.66)                                           |                                                                                                                                                                                                                                                                                                                                                                                                                                                                                                                          |                                                                                                                                                                                                                                                  |       |       |   |               |   |               |         |            |
| 1                                      | 17042 (25.99)                                           |                                                                                                                                                                                                                                                                                                                                                                                                                                                                                                                          |                                                                                                                                                                                                                                                  |       |       |   |               |   |               |         |            |
| Missing                                | 230 (0.35)                                              |                                                                                                                                                                                                                                                                                                                                                                                                                                                                                                                          |                                                                                                                                                                                                                                                  |       |       |   |               |   |               |         |            |



|                                                                          |                                                                                                                                   | <p>b. Yes, therapy(ies)</p> <p>c. Local/external application (Ointment, cream, gel, balm, spray, oil, etc.)</p> <p>d. None</p>                                                                                                                                                                                                                                                                                                                                                                                                                                                                                                                                                                                                                                                      |                                                                                                                                                                                                                                                                                                                                                                                           |       |       |   |               |      |               |         |               |      |              |   |            |         |            |
|--------------------------------------------------------------------------|-----------------------------------------------------------------------------------------------------------------------------------|-------------------------------------------------------------------------------------------------------------------------------------------------------------------------------------------------------------------------------------------------------------------------------------------------------------------------------------------------------------------------------------------------------------------------------------------------------------------------------------------------------------------------------------------------------------------------------------------------------------------------------------------------------------------------------------------------------------------------------------------------------------------------------------|-------------------------------------------------------------------------------------------------------------------------------------------------------------------------------------------------------------------------------------------------------------------------------------------------------------------------------------------------------------------------------------------|-------|-------|---|---------------|------|---------------|---------|---------------|------|--------------|---|------------|---------|------------|
| 2) Problem did you have with sleeping?                                   | <p>1 if responded 4. Frequently (5 or more nights per week), for answering any of the 4 questions listed.</p> <p>0 otherwise.</p> | <p>Now I would like to ask you a few questions about your sleep during the past 1 month.</p> <p>How often do you...? Would you say Never, Rarely (1-2 nights per week), Occasionally (3-4 nights per week), or Frequently (5 or more nights per week)?</p> <p>1. Never</p> <p>2. Rarely (1-2 nights per week)</p> <p>3. Occasionally (3-4 nights per week)</p> <p>4. Frequently (5 or more nights per week)</p> <p>1. How often do you have trouble falling asleep?</p> <p>2. How often did you wake up during the night and had trouble getting back to sleep?</p> <p>3. How often did you wake up too early in the morning and were not being able to fall asleep again?</p> <p>4. How often did you feel unrested during the day, no matter how many hours of sleep you had?</p> | <table border="1"> <thead> <tr> <th>Value</th> <th>N (%)</th> </tr> </thead> <tbody> <tr> <td>0</td> <td>57554 (87.79)</td> </tr> <tr> <td>1</td> <td>7786 (11.88)</td> </tr> <tr> <td>Missing</td> <td>222 (0.34)</td> </tr> </tbody> </table>                                                                                                                                           | Value | N (%) | 0 | 57554 (87.79) | 1    | 7786 (11.88)  | Missing | 222 (0.34)    |      |              |   |            |         |            |
| Value                                                                    | N (%)                                                                                                                             |                                                                                                                                                                                                                                                                                                                                                                                                                                                                                                                                                                                                                                                                                                                                                                                     |                                                                                                                                                                                                                                                                                                                                                                                           |       |       |   |               |      |               |         |               |      |              |   |            |         |            |
| 0                                                                        | 57554 (87.79)                                                                                                                     |                                                                                                                                                                                                                                                                                                                                                                                                                                                                                                                                                                                                                                                                                                                                                                                     |                                                                                                                                                                                                                                                                                                                                                                                           |       |       |   |               |      |               |         |               |      |              |   |            |         |            |
| 1                                                                        | 7786 (11.88)                                                                                                                      |                                                                                                                                                                                                                                                                                                                                                                                                                                                                                                                                                                                                                                                                                                                                                                                     |                                                                                                                                                                                                                                                                                                                                                                                           |       |       |   |               |      |               |         |               |      |              |   |            |         |            |
| Missing                                                                  | 222 (0.34)                                                                                                                        |                                                                                                                                                                                                                                                                                                                                                                                                                                                                                                                                                                                                                                                                                                                                                                                     |                                                                                                                                                                                                                                                                                                                                                                                           |       |       |   |               |      |               |         |               |      |              |   |            |         |            |
| 3) Difficulty did you have in seeing (person or object) across the road? | <p>Very good = 0, Good = 0.25, Fair = 0.50, Poor = 0.75, Very poor = 1</p>                                                        | <p>1. How good is your eyesight for seeing things at a distance, like recognizing a person across the street (or 20 meters away) whether or not you wear glasses, contacts, or corrective lenses?</p> <p>1. Very good</p> <p>2. Good</p> <p>3. Fair</p> <p>4. Poor</p> <p>5. Very poor</p>                                                                                                                                                                                                                                                                                                                                                                                                                                                                                          | <table border="1"> <thead> <tr> <th>Value</th> <th>N (%)</th> </tr> </thead> <tbody> <tr> <td>0</td> <td>4142 (6.32)</td> </tr> <tr> <td>0.25</td> <td>25786 (39.33)</td> </tr> <tr> <td>0.5</td> <td>25991 (39.64)</td> </tr> <tr> <td>0.75</td> <td>8472 (12.92)</td> </tr> <tr> <td>1</td> <td>966 (1.47)</td> </tr> <tr> <td>Missing</td> <td>205 (0.31)</td> </tr> </tbody> </table> | Value | N (%) | 0 | 4142 (6.32)   | 0.25 | 25786 (39.33) | 0.5     | 25991 (39.64) | 0.75 | 8472 (12.92) | 1 | 966 (1.47) | Missing | 205 (0.31) |
| Value                                                                    | N (%)                                                                                                                             |                                                                                                                                                                                                                                                                                                                                                                                                                                                                                                                                                                                                                                                                                                                                                                                     |                                                                                                                                                                                                                                                                                                                                                                                           |       |       |   |               |      |               |         |               |      |              |   |            |         |            |
| 0                                                                        | 4142 (6.32)                                                                                                                       |                                                                                                                                                                                                                                                                                                                                                                                                                                                                                                                                                                                                                                                                                                                                                                                     |                                                                                                                                                                                                                                                                                                                                                                                           |       |       |   |               |      |               |         |               |      |              |   |            |         |            |
| 0.25                                                                     | 25786 (39.33)                                                                                                                     |                                                                                                                                                                                                                                                                                                                                                                                                                                                                                                                                                                                                                                                                                                                                                                                     |                                                                                                                                                                                                                                                                                                                                                                                           |       |       |   |               |      |               |         |               |      |              |   |            |         |            |
| 0.5                                                                      | 25991 (39.64)                                                                                                                     |                                                                                                                                                                                                                                                                                                                                                                                                                                                                                                                                                                                                                                                                                                                                                                                     |                                                                                                                                                                                                                                                                                                                                                                                           |       |       |   |               |      |               |         |               |      |              |   |            |         |            |
| 0.75                                                                     | 8472 (12.92)                                                                                                                      |                                                                                                                                                                                                                                                                                                                                                                                                                                                                                                                                                                                                                                                                                                                                                                                     |                                                                                                                                                                                                                                                                                                                                                                                           |       |       |   |               |      |               |         |               |      |              |   |            |         |            |
| 1                                                                        | 966 (1.47)                                                                                                                        |                                                                                                                                                                                                                                                                                                                                                                                                                                                                                                                                                                                                                                                                                                                                                                                     |                                                                                                                                                                                                                                                                                                                                                                                           |       |       |   |               |      |               |         |               |      |              |   |            |         |            |
| Missing                                                                  | 205 (0.31)                                                                                                                        |                                                                                                                                                                                                                                                                                                                                                                                                                                                                                                                                                                                                                                                                                                                                                                                     |                                                                                                                                                                                                                                                                                                                                                                                           |       |       |   |               |      |               |         |               |      |              |   |            |         |            |
| 4) Difficulty did you have in seeing                                     | <p>Very good = 0, Good = 0.25,</p>                                                                                                | <p>1. How good is your eyesight for seeing things up close, like reading ordinary newspaper print whether or not you wear glasses, contacts, or corrective lenses</p> <p>1. Very good</p>                                                                                                                                                                                                                                                                                                                                                                                                                                                                                                                                                                                           | <table border="1"> <thead> <tr> <th>Value</th> <th>N (%)</th> </tr> </thead> <tbody> <tr> <td>0</td> <td>3262 (4.98)</td> </tr> <tr> <td>0.25</td> <td>22743 (34.69)</td> </tr> <tr> <td>0.5</td> <td>28024 (42.74)</td> </tr> </tbody> </table>                                                                                                                                          | Value | N (%) | 0 | 3262 (4.98)   | 0.25 | 22743 (34.69) | 0.5     | 28024 (42.74) |      |              |   |            |         |            |
| Value                                                                    | N (%)                                                                                                                             |                                                                                                                                                                                                                                                                                                                                                                                                                                                                                                                                                                                                                                                                                                                                                                                     |                                                                                                                                                                                                                                                                                                                                                                                           |       |       |   |               |      |               |         |               |      |              |   |            |         |            |
| 0                                                                        | 3262 (4.98)                                                                                                                       |                                                                                                                                                                                                                                                                                                                                                                                                                                                                                                                                                                                                                                                                                                                                                                                     |                                                                                                                                                                                                                                                                                                                                                                                           |       |       |   |               |      |               |         |               |      |              |   |            |         |            |
| 0.25                                                                     | 22743 (34.69)                                                                                                                     |                                                                                                                                                                                                                                                                                                                                                                                                                                                                                                                                                                                                                                                                                                                                                                                     |                                                                                                                                                                                                                                                                                                                                                                                           |       |       |   |               |      |               |         |               |      |              |   |            |         |            |
| 0.5                                                                      | 28024 (42.74)                                                                                                                     |                                                                                                                                                                                                                                                                                                                                                                                                                                                                                                                                                                                                                                                                                                                                                                                     |                                                                                                                                                                                                                                                                                                                                                                                           |       |       |   |               |      |               |         |               |      |              |   |            |         |            |

|                                                          |                                               |                                                                                                                                                                                            |         |               |
|----------------------------------------------------------|-----------------------------------------------|--------------------------------------------------------------------------------------------------------------------------------------------------------------------------------------------|---------|---------------|
| an object at arm's length?                               | Fair = 0.50,<br>Poor = 0.75,<br>Very poor = 1 | 2. Good<br>3. Fair<br>4. Poor<br>5. Very poor                                                                                                                                              | 0.75    | 10198 (15.55) |
|                                                          |                                               |                                                                                                                                                                                            | 1       | 1072 (1.64)   |
|                                                          |                                               |                                                                                                                                                                                            | Missing | 263 (0.4)     |
| <b>Functional assessment (9 deficits)</b>                | 1 = Yes,<br>0 = No                            | 1. Because of physical or health problems, do you have difficulty doing any of the activities? Exclude any difficulties that you expect to last less than three months.<br>1. Yes<br>2. No |         |               |
| 1) Walking 100 yards                                     |                                               |                                                                                                                                                                                            | Value   | N (%)         |
|                                                          |                                               |                                                                                                                                                                                            | 0       | 50503 (77.03) |
|                                                          |                                               |                                                                                                                                                                                            | 1       | 14782 (22.55) |
|                                                          |                                               |                                                                                                                                                                                            | Missing | 277 (0.42)    |
| 2) Sitting for 2 hours or more                           |                                               |                                                                                                                                                                                            | Value   | N (%)         |
|                                                          |                                               |                                                                                                                                                                                            | 0       | 46098 (70.31) |
|                                                          |                                               |                                                                                                                                                                                            | 1       | 19187 (29.27) |
|                                                          |                                               |                                                                                                                                                                                            | Missing | 277 (0.42)    |
| 3) Getting up from a chair after sitting for long period |                                               |                                                                                                                                                                                            | Value   | N (%)         |
|                                                          |                                               |                                                                                                                                                                                            | 0       | 44358 (67.66) |
|                                                          |                                               |                                                                                                                                                                                            | 1       | 20927 (31.92) |
|                                                          |                                               |                                                                                                                                                                                            | Missing | 277 (0.42)    |
| 4) Climbing one flight of stairs without resting         |                                               |                                                                                                                                                                                            | Value   | N (%)         |
|                                                          |                                               |                                                                                                                                                                                            | 0       | 37857 (57.74) |
|                                                          |                                               |                                                                                                                                                                                            | 1       | 27428 (41.84) |
|                                                          |                                               |                                                                                                                                                                                            | Missing | 277 (0.42)    |
| 5) Stooping, kneeling or crouching                       |                                               |                                                                                                                                                                                            | Value   | N (%)         |
|                                                          |                                               |                                                                                                                                                                                            | 0       | 36375 (55.48) |
|                                                          |                                               |                                                                                                                                                                                            | 1       | 28910 (44.10) |
|                                                          |                                               |                                                                                                                                                                                            | Missing | 277 (0.42)    |
| 6) Reaching or extending arms                            |                                               |                                                                                                                                                                                            | Value   | N (%)         |
|                                                          |                                               |                                                                                                                                                                                            | 0       | 56168 (85.67) |
|                                                          |                                               |                                                                                                                                                                                            | 1       | 9117 (13.91)  |

|                                                                            |                    |                                                                                                                                                                                                                                                                                                                                                        |         |               |
|----------------------------------------------------------------------------|--------------------|--------------------------------------------------------------------------------------------------------------------------------------------------------------------------------------------------------------------------------------------------------------------------------------------------------------------------------------------------------|---------|---------------|
| above shoulder level (either arm)                                          |                    |                                                                                                                                                                                                                                                                                                                                                        | Missing | 277 (0.42)    |
| 7) Pulling or pushing large objects                                        |                    |                                                                                                                                                                                                                                                                                                                                                        | Value   | N (%)         |
|                                                                            |                    |                                                                                                                                                                                                                                                                                                                                                        | 0       | 40486 (61.75) |
|                                                                            |                    |                                                                                                                                                                                                                                                                                                                                                        | 1       | 24798 (37.82) |
|                                                                            |                    |                                                                                                                                                                                                                                                                                                                                                        | Missing | 278 (0.42)    |
| 8) Lifting or carrying weights over 5 kilos, like a heavy bag of groceries |                    |                                                                                                                                                                                                                                                                                                                                                        | Value   | N (%)         |
|                                                                            |                    |                                                                                                                                                                                                                                                                                                                                                        | 0       | 48469 (73.93) |
|                                                                            |                    |                                                                                                                                                                                                                                                                                                                                                        | 1       | 16815 (25.65) |
|                                                                            |                    |                                                                                                                                                                                                                                                                                                                                                        | Missing | 278 (0.42)    |
| 9) Picking up a coin from a table                                          |                    |                                                                                                                                                                                                                                                                                                                                                        | Value   | N (%)         |
|                                                                            |                    |                                                                                                                                                                                                                                                                                                                                                        | 0       | 61255 (93.43) |
|                                                                            |                    |                                                                                                                                                                                                                                                                                                                                                        | 1       | 4029 (6.15)   |
|                                                                            |                    |                                                                                                                                                                                                                                                                                                                                                        | Missing | 278 (0.42)    |
| <b>ADL/IADL<sup>†</sup> limitations (13 deficits)</b>                      | 1 = Yes,<br>0 = No | Now, I will ask you about a few everyday activities. Please tell me if you have any difficulty with these because of a physical, mental, emotional, or memory problem. Please exclude any difficulties you expect to last less than three months.<br><br>Because of a health or memory problem, do you have any difficulty with...?<br>1. Yes<br>2. No |         |               |
| 1) Dressing, including putting on chappals, shoes, etc.                    |                    |                                                                                                                                                                                                                                                                                                                                                        | Value   | N (%)         |
|                                                                            |                    |                                                                                                                                                                                                                                                                                                                                                        | 0       | 62376 (95.14) |
|                                                                            |                    |                                                                                                                                                                                                                                                                                                                                                        | 1       | 2905 (4.43)   |
|                                                                            |                    |                                                                                                                                                                                                                                                                                                                                                        | Missing | 281 (0.43)    |
| 2) Walking across a room                                                   |                    |                                                                                                                                                                                                                                                                                                                                                        | Value   | N (%)         |
|                                                                            |                    |                                                                                                                                                                                                                                                                                                                                                        | 0       | 62466 (95.28) |
|                                                                            |                    |                                                                                                                                                                                                                                                                                                                                                        | 1       | 2815 (4.29)   |

|                                                    |  |  |         |               |
|----------------------------------------------------|--|--|---------|---------------|
|                                                    |  |  | Missing | 281 (0.43)    |
| 3) Bathing                                         |  |  | Value   | N (%)         |
|                                                    |  |  | 0       | 62462 (95.27) |
|                                                    |  |  | 1       | 2819 (4.30)   |
|                                                    |  |  | Missing | 281 (0.43)    |
| 4) Eating                                          |  |  | Value   | N (%)         |
|                                                    |  |  | 0       | 62336 (95.08) |
|                                                    |  |  | 1       | 2945 (4.49)   |
|                                                    |  |  | Missing | 281 (0.43)    |
| 5) Getting in or out of bed                        |  |  | Value   | N (%)         |
|                                                    |  |  | 0       | 60712 (92.60) |
|                                                    |  |  | 1       | 4569 (6.97)   |
|                                                    |  |  | Missing | 281 (0.43)    |
| 6) Using the toilet, including getting up and down |  |  | Value   | N (%)         |
|                                                    |  |  | 0       | 58531 (89.28) |
|                                                    |  |  | 1       | 6750 (10.30)  |
|                                                    |  |  | Missing | 281 (0.43)    |
| 7) Preparing a hot meal (cooking and serving)      |  |  | Value   | N (%)         |
|                                                    |  |  | 0       | 58627 (89.42) |
|                                                    |  |  | 1       | 6654 (10.15)  |
|                                                    |  |  | Missing | 281 (0.43)    |
| 8) Shopping for groceries                          |  |  | Value   | N (%)         |
|                                                    |  |  | 0       | 56411 (86.04) |
|                                                    |  |  | 1       | 8865 (13.52)  |
|                                                    |  |  | Missing | 286 (0.44)    |
| 9) Making telephone calls                          |  |  | Value   | N (%)         |
|                                                    |  |  | 0       | 53181 (81.12) |
|                                                    |  |  | 1       | 12043 (18.37) |
|                                                    |  |  | Missing | 338 (0.52)    |
| 10) Taking medications                             |  |  | Value   | N (%)         |
|                                                    |  |  | 0       | 59283 (90.42) |
|                                                    |  |  | 1       | 5998 (9.15)   |

|                                                                                         |                                                                              |                                                                                                                                                                                                                                                                                                                                                                                                    |         |               |
|-----------------------------------------------------------------------------------------|------------------------------------------------------------------------------|----------------------------------------------------------------------------------------------------------------------------------------------------------------------------------------------------------------------------------------------------------------------------------------------------------------------------------------------------------------------------------------------------|---------|---------------|
|                                                                                         |                                                                              |                                                                                                                                                                                                                                                                                                                                                                                                    | Missing | 281 (0.43)    |
| 11) Doing work around the house or garden                                               |                                                                              |                                                                                                                                                                                                                                                                                                                                                                                                    | Value   | N (%)         |
|                                                                                         |                                                                              |                                                                                                                                                                                                                                                                                                                                                                                                    | 0       | 55490 (84.64) |
|                                                                                         |                                                                              |                                                                                                                                                                                                                                                                                                                                                                                                    | 1       | 9791 (14.93)  |
|                                                                                         |                                                                              |                                                                                                                                                                                                                                                                                                                                                                                                    | Missing | 281 (0.43)    |
| 12) Managing money, such as paying bills and keeping track of expenses                  |                                                                              |                                                                                                                                                                                                                                                                                                                                                                                                    | Value   | N (%)         |
|                                                                                         |                                                                              |                                                                                                                                                                                                                                                                                                                                                                                                    | 0       | 54799 (83.58) |
|                                                                                         |                                                                              |                                                                                                                                                                                                                                                                                                                                                                                                    | 1       | 10482 (15.99) |
|                                                                                         |                                                                              |                                                                                                                                                                                                                                                                                                                                                                                                    | Missing | 281 (0.43)    |
| 13) Getting around or finding address in unfamiliar place                               |                                                                              |                                                                                                                                                                                                                                                                                                                                                                                                    | Value   | N (%)         |
|                                                                                         |                                                                              |                                                                                                                                                                                                                                                                                                                                                                                                    | 0       | 53400 (81.45) |
|                                                                                         |                                                                              |                                                                                                                                                                                                                                                                                                                                                                                                    | 1       | 11881 (18.12) |
|                                                                                         |                                                                              |                                                                                                                                                                                                                                                                                                                                                                                                    | Missing | 281 (0.43)    |
| <b>Any form of mental impairment (1) (Proxy variable used for mental health status)</b> | 1 if Yes to 1. & Selected b. in 2.<br>0 otherwise                            | 1. Do you have any form of physical or mental impairment?<br>1. Yes<br>2. No<br><br>2. Which form of impairment do you have?<br>a. Physical impairment such as lower body or upper body<br>b. Mental impairment such as intellectual, cognition, or learning impairment<br>c. Hearing impairment<br>d. Visual impairment<br>e. Speech impairment such as speech production, language comprehension | Value   | N (%)         |
|                                                                                         |                                                                              |                                                                                                                                                                                                                                                                                                                                                                                                    | 0       | 64046 (97.69) |
|                                                                                         |                                                                              |                                                                                                                                                                                                                                                                                                                                                                                                    | 1       | 1222 (1.86)   |
|                                                                                         |                                                                              |                                                                                                                                                                                                                                                                                                                                                                                                    | Missing | 294 (0.45)    |
| <b>Body mass index (BMI) (1 deficit)</b>                                                | BMI $\geq$ 18.5 - <25 = 0 (Normal)<br>BMI $\geq$ 25 - <30 = 0.5 (Overweight) | BMI is weight in kilograms divided by height in meters squared.                                                                                                                                                                                                                                                                                                                                    | Value   | N (%)         |
|                                                                                         |                                                                              |                                                                                                                                                                                                                                                                                                                                                                                                    | 0       | 30872 (47.09) |
|                                                                                         |                                                                              |                                                                                                                                                                                                                                                                                                                                                                                                    | 0.5     | 12852 (19.60) |
|                                                                                         |                                                                              |                                                                                                                                                                                                                                                                                                                                                                                                    | 1       | 15349 (23.41) |
|                                                                                         |                                                                              |                                                                                                                                                                                                                                                                                                                                                                                                    | Missing | 6489 (9.90)   |

|                                  | BMI < 18.5 =<br>1<br>(Underweight)<br>BMI >= 30 =<br>1 (Obese)                                                                                                                                                                                                                                                                                                                                              |                                                                                                                                                                                                                  |                                                                                                                                                                                                                                                    |       |       |   |               |   |               |         |              |
|----------------------------------|-------------------------------------------------------------------------------------------------------------------------------------------------------------------------------------------------------------------------------------------------------------------------------------------------------------------------------------------------------------------------------------------------------------|------------------------------------------------------------------------------------------------------------------------------------------------------------------------------------------------------------------|----------------------------------------------------------------------------------------------------------------------------------------------------------------------------------------------------------------------------------------------------|-------|-------|---|---------------|---|---------------|---------|--------------|
| <b>Grip strength (1 deficit)</b> | <p>Grip (in kg), (Left+Right hand)/2</p> <p>Men:<br/>(0&lt;BMI&lt;=24 and grip&lt;=29)<br/>or<br/>(24&lt;BMI&lt;=26 and grip &lt;=30) or<br/>(26&lt;BMI&lt;=28 and grip&lt;=30)<br/>or<br/>(28&lt;BMI&lt;=40 and grip&lt;=32)<br/>= 1 (Weak grip)</p> <p>Women:<br/>(0&lt;BMI&lt;=23 and grip&lt;=17)<br/>or<br/>(23&lt;BMI&lt;=26 and grip &lt;=17.3) or<br/>(26&lt;BMI&lt;=29 and grip&lt;=18)<br/>or</p> | The LASI measured grip strength in kilograms using a handheld dynamometer (Smedley's Hand Dynamometer). Health investigators collected two readings of grip strength for both hands (dominant and non-dominant). | <table border="1"> <thead> <tr> <th>Value</th> <th>N (%)</th> </tr> </thead> <tbody> <tr> <td>0</td> <td>23368 (35.64)</td> </tr> <tr> <td>1</td> <td>35313 (53.86)</td> </tr> <tr> <td>Missing</td> <td>6881 (10.50)</td> </tr> </tbody> </table> | Value | N (%) | 0 | 23368 (35.64) | 1 | 35313 (53.86) | Missing | 6881 (10.50) |
| Value                            | N (%)                                                                                                                                                                                                                                                                                                                                                                                                       |                                                                                                                                                                                                                  |                                                                                                                                                                                                                                                    |       |       |   |               |   |               |         |              |
| 0                                | 23368 (35.64)                                                                                                                                                                                                                                                                                                                                                                                               |                                                                                                                                                                                                                  |                                                                                                                                                                                                                                                    |       |       |   |               |   |               |         |              |
| 1                                | 35313 (53.86)                                                                                                                                                                                                                                                                                                                                                                                               |                                                                                                                                                                                                                  |                                                                                                                                                                                                                                                    |       |       |   |               |   |               |         |              |
| Missing                          | 6881 (10.50)                                                                                                                                                                                                                                                                                                                                                                                                |                                                                                                                                                                                                                  |                                                                                                                                                                                                                                                    |       |       |   |               |   |               |         |              |

|                                                                                                                                                                       | (29<BMI<=40 and grip<=21) = 1 (Weak grip)<br><br>1 = weak grip if fulfilled above specified conditions, 0 otherwise |                                                                                                                                                   |                                                                                                                                                                                                                                                  |       |       |   |               |   |               |         |              |
|-----------------------------------------------------------------------------------------------------------------------------------------------------------------------|---------------------------------------------------------------------------------------------------------------------|---------------------------------------------------------------------------------------------------------------------------------------------------|--------------------------------------------------------------------------------------------------------------------------------------------------------------------------------------------------------------------------------------------------|-------|-------|---|---------------|---|---------------|---------|--------------|
| <b>Timed walk (gait speed) (1 deficit)</b>                                                                                                                            | Gait speed = 1 if timed walk > 10 (Slow)<br>Gait speed = 0 if timed walk <=10 (Normal)                              | LASI, respondents were asked to walk 4 metres twice. The time taken to walk was recorded in seconds. Each time, and the mean time was calculated. | <table border="1"> <thead> <tr> <th>Value</th> <th>N (%)</th> </tr> </thead> <tbody> <tr> <td>0</td> <td>57032 (86.99)</td> </tr> <tr> <td>1</td> <td>1289 (1.97)</td> </tr> <tr> <td>Missing</td> <td>7241 (11.04)</td> </tr> </tbody> </table> | Value | N (%) | 0 | 57032 (86.99) | 1 | 1289 (1.97)   | Missing | 7241 (11.04) |
| Value                                                                                                                                                                 | N (%)                                                                                                               |                                                                                                                                                   |                                                                                                                                                                                                                                                  |       |       |   |               |   |               |         |              |
| 0                                                                                                                                                                     | 57032 (86.99)                                                                                                       |                                                                                                                                                   |                                                                                                                                                                                                                                                  |       |       |   |               |   |               |         |              |
| 1                                                                                                                                                                     | 1289 (1.97)                                                                                                         |                                                                                                                                                   |                                                                                                                                                                                                                                                  |       |       |   |               |   |               |         |              |
| Missing                                                                                                                                                               | 7241 (11.04)                                                                                                        |                                                                                                                                                   |                                                                                                                                                                                                                                                  |       |       |   |               |   |               |         |              |
| <b>Frailty Index Scoring:</b><br>$\sum(\text{variables})/40$<br><b>Score range: 0 – 1</b><br><b>Cut points:</b><br><b>Robust = 0 to &lt; 0.25, Frail = 0.25 – 1.0</b> |                                                                                                                     |                                                                                                                                                   | <table border="1"> <thead> <tr> <th>Value</th> <th>N (%)</th> </tr> </thead> <tbody> <tr> <td>0</td> <td>42767 (65.23)</td> </tr> <tr> <td>1</td> <td>14882 (22.70)</td> </tr> <tr> <td>Missing</td> <td>7913 (.07)</td> </tr> </tbody> </table> | Value | N (%) | 0 | 42767 (65.23) | 1 | 14882 (22.70) | Missing | 7913 (.07)   |
| Value                                                                                                                                                                 | N (%)                                                                                                               |                                                                                                                                                   |                                                                                                                                                                                                                                                  |       |       |   |               |   |               |         |              |
| 0                                                                                                                                                                     | 42767 (65.23)                                                                                                       |                                                                                                                                                   |                                                                                                                                                                                                                                                  |       |       |   |               |   |               |         |              |
| 1                                                                                                                                                                     | 14882 (22.70)                                                                                                       |                                                                                                                                                   |                                                                                                                                                                                                                                                  |       |       |   |               |   |               |         |              |
| Missing                                                                                                                                                               | 7913 (.07)                                                                                                          |                                                                                                                                                   |                                                                                                                                                                                                                                                  |       |       |   |               |   |               |         |              |

\* Unweighted figures.

† ADL: Activities of Daily Living; IADL: Instrumental Activities of Daily Living

**S2 Table. Definition of outcomes – hospitalization in last 12 months and any fall in past 2 years.**

| Survey questions                                                                                                                                                                                                                                                                                                                                                                                                                                                                                                                                                                                                                                                                                                                                                                                                                                                                                                                                                                                                                                                                                                                                                                                                                                                                                                                                                   | Outcome definition                                                                                                                                                                                                                                                                                                                                                                                                                                                                                                                                                                                         |
|--------------------------------------------------------------------------------------------------------------------------------------------------------------------------------------------------------------------------------------------------------------------------------------------------------------------------------------------------------------------------------------------------------------------------------------------------------------------------------------------------------------------------------------------------------------------------------------------------------------------------------------------------------------------------------------------------------------------------------------------------------------------------------------------------------------------------------------------------------------------------------------------------------------------------------------------------------------------------------------------------------------------------------------------------------------------------------------------------------------------------------------------------------------------------------------------------------------------------------------------------------------------------------------------------------------------------------------------------------------------|------------------------------------------------------------------------------------------------------------------------------------------------------------------------------------------------------------------------------------------------------------------------------------------------------------------------------------------------------------------------------------------------------------------------------------------------------------------------------------------------------------------------------------------------------------------------------------------------------------|
| <p><b>Q1. In the past 12 months, have you visited any health care facility, or any health professional has visited you?</b> <i>[Please identify ALL the facilities that you have visited]</i><br/><i>[Instruction: If response is ‘p’ freeze all other options]</i></p> <p><b>Public facility:</b></p> <ul style="list-style-type: none"> <li>a. Health post/sub centers</li> <li>b. Primary health center/Urban Health Center</li> <li>c. Community health center</li> <li>d. District / Sub-district hospital</li> <li>e. Government/tertiary hospital</li> <li>f. Govt. AYUSH hospital</li> </ul> <p><b>Private facility:</b></p> <ul style="list-style-type: none"> <li>g. Private hospital/nursing home</li> <li>h. Private clinic (OPD based services)</li> <li>i. NGO/Charity/Trust/Church-run hospital</li> <li>j. Private AYUSH hospital</li> </ul> <p><b>Others:</b></p> <ul style="list-style-type: none"> <li>k. Health camp</li> <li>l. Mobile healthcare unit</li> <li>m. Pharmacy/drugstore</li> <li>n. Home visit</li> <li>o. Other, please specify _____</li> <li>p. None</li> </ul> <p><b>Q2. Over the last 12 months, how many times you were admitted as patient to a hospital/long-term care facility for at least one night?</b> <i>[Instruction for the interviewer: If respondent did not stay at hospital, enter ‘0’]</i> _____ Times</p> | <p><b>Number of hospitalizations in past 12 months</b> was defined as response to Q2. Respondents who said ‘None’ to Q1 were also coded as ‘0’.</p> <p>The variable <b>ever hospitalised in past 12 months</b> was coded as ‘yes’ if the number of hospitalizations was 1 or more and ‘no’ if 0.</p> <p>Respondents with a non-zero response to Q2 were then asked Q3. The maximum of the responses to the two questions, Q2 and Q3, was used to construct the count variable <b>number of nights in hospital in past 12 months</b>. In addition, respondents who said ‘None’ to Q1 were coded as ‘0’.</p> |



|                                                                                                                                                                                                                                                                                                                                                                                                                                                                                                                                                |                                                                                                                                                                                      |
|------------------------------------------------------------------------------------------------------------------------------------------------------------------------------------------------------------------------------------------------------------------------------------------------------------------------------------------------------------------------------------------------------------------------------------------------------------------------------------------------------------------------------------------------|--------------------------------------------------------------------------------------------------------------------------------------------------------------------------------------|
| <p><b>Q3. [Ask only if Q2 ≥ 1] How many nights have you spent in the hospital during the past 12 months?</b> Number of nights _____</p>                                                                                                                                                                                                                                                                                                                                                                                                        |                                                                                                                                                                                      |
| <p><b>Q1. In the past two years, have you sustained any major injury?</b><br/> 1. Yes<br/> 2. No</p> <p><b>Q2. [Ask only if Q1=1] What was the cause of that injury? [Multiple answers are allowed]</b><br/> a. Traffic accident<br/> b. Struck by person or object<br/> c. Fire, flames, burn, electric Shock<br/> d. Drowning<br/> e. Poisoning<br/> f. Animal attack or bite<br/> g. Fall<br/> h. Other, please specify _____</p> <p><b>Q3. [Ask only if Q2≠ g] In the past two years, have you fallen down?</b><br/> 1. Yes<br/> 2. No</p> | <p>Individuals having <b>any fall in last 2 years</b> were identified as those who responded 'Yes' to Q1 and identified 'Fall' in response to Q2, or those who said 'Yes' to Q3.</p> |

**S3 Table. Construction of cognition score and distribution of its components.**

| Domain             | Item                  | Measurement                                                                                                          | Questions                                                                                                                            | Range | Distribution in 45-plus participants (n=65,562) |              |
|--------------------|-----------------------|----------------------------------------------------------------------------------------------------------------------|--------------------------------------------------------------------------------------------------------------------------------------|-------|-------------------------------------------------|--------------|
| <b>Memory</b>      | Immediate word recall | Interviewer read out a list of 10 words and respondents were asked to repeat the words.                              | I will read a set of 10 words and ask you to recall as many as you can.<br>1. Number of words respondent (R) correctly recalls _____ | 0-10  | 0                                               | 538 (0.8)    |
|                    |                       |                                                                                                                      |                                                                                                                                      |       | 1                                               | 1057 (1.7)   |
|                    |                       |                                                                                                                      |                                                                                                                                      |       | 2                                               | 3159 (4.9)   |
|                    |                       |                                                                                                                      |                                                                                                                                      |       | 3                                               | 6899 (10.8)  |
|                    |                       |                                                                                                                      |                                                                                                                                      |       | 4                                               | 11872 (18.6) |
|                    |                       |                                                                                                                      |                                                                                                                                      |       | 5                                               | 14183 (22.2) |
|                    |                       |                                                                                                                      |                                                                                                                                      |       | 6                                               | 12298 (19.2) |
|                    |                       |                                                                                                                      |                                                                                                                                      |       | 7                                               | 8243 (12.9)  |
|                    |                       |                                                                                                                      |                                                                                                                                      |       | 8                                               | 3884 (6.1)   |
|                    |                       |                                                                                                                      |                                                                                                                                      |       | 9                                               | 1238 (1.9)   |
|                    |                       |                                                                                                                      |                                                                                                                                      |       | 10                                              | 595 (0.9)    |
|                    |                       |                                                                                                                      |                                                                                                                                      |       | Missing                                         | 1596         |
|                    | Delayed word recall   | Respondents were asked to recall the same words read out for immediate recall after some time.                       | 1. Number of words respondent (R) correctly recalls _____                                                                            | 0-10  | 1                                               | 4399 (7.3)   |
|                    |                       |                                                                                                                      |                                                                                                                                      |       | 2                                               | 8068 (13.5)  |
|                    |                       |                                                                                                                      |                                                                                                                                      |       | 3                                               | 12022 (20)   |
|                    |                       |                                                                                                                      |                                                                                                                                      |       | 4                                               | 12800 (21.3) |
|                    |                       |                                                                                                                      |                                                                                                                                      |       | 5                                               | 9970 (16.6)  |
|                    |                       |                                                                                                                      |                                                                                                                                      |       | 6                                               | 6505 (10.8)  |
|                    |                       |                                                                                                                      |                                                                                                                                      |       | 7                                               | 3541 (5.9)   |
|                    |                       |                                                                                                                      |                                                                                                                                      |       | 8                                               | 1662 (2.8)   |
|                    |                       |                                                                                                                      |                                                                                                                                      |       | 9                                               | 609 (1)      |
|                    |                       |                                                                                                                      |                                                                                                                                      |       | 10                                              | 393 (0.7)    |
|                    |                       |                                                                                                                      |                                                                                                                                      |       | Missing                                         | 5593         |
| <b>Orientation</b> | Time                  | Respondents were asked to state today's date, month and year and day of the week. For each question, the score was 0 | Date<br>1. Correct<br>2. Incorrect<br>Month                                                                                          | 0-4   | 0                                               | 1345 (2.1)   |
|                    |                       |                                                                                                                      |                                                                                                                                      |       | 1                                               | 7306 (11.4)  |
|                    |                       |                                                                                                                      |                                                                                                                                      |       | 2                                               | 10485 (16.4) |

|                            |                   |                                                                                                                                                                                                                                                        |                                                                                                                                                                                                                                                                                                                                                                                                                                              |     |                                                                                                                                                                                                                                                                                                           |   |              |   |              |         |              |         |             |   |              |         |      |
|----------------------------|-------------------|--------------------------------------------------------------------------------------------------------------------------------------------------------------------------------------------------------------------------------------------------------|----------------------------------------------------------------------------------------------------------------------------------------------------------------------------------------------------------------------------------------------------------------------------------------------------------------------------------------------------------------------------------------------------------------------------------------------|-----|-----------------------------------------------------------------------------------------------------------------------------------------------------------------------------------------------------------------------------------------------------------------------------------------------------------|---|--------------|---|--------------|---------|--------------|---------|-------------|---|--------------|---------|------|
|                            |                   | (incorrect responses) or 1 (correct responses).                                                                                                                                                                                                        | <p>1. Correct<br/>2. Incorrect</p> <p>Year</p> <p>1. Correct<br/>2. Incorrect</p> <p>Please tell me which day of week is today. Is it Monday, Tuesday, Wednesday, Thursday, Friday, Saturday, or Sunday?</p> <p>1. Correct<br/>2. Incorrect</p>                                                                                                                                                                                              |     | <table border="1"> <tbody> <tr> <td>3</td> <td>10599 (16.6)</td> </tr> <tr> <td>4</td> <td>34209 (53.5)</td> </tr> <tr> <td>Missing</td> <td>1618</td> </tr> </tbody> </table>                                                                                                                            | 3 | 10599 (16.6) | 4 | 34209 (53.5) | Missing | 1618         |         |             |   |              |         |      |
| 3                          | 10599 (16.6)      |                                                                                                                                                                                                                                                        |                                                                                                                                                                                                                                                                                                                                                                                                                                              |     |                                                                                                                                                                                                                                                                                                           |   |              |   |              |         |              |         |             |   |              |         |      |
| 4                          | 34209 (53.5)      |                                                                                                                                                                                                                                                        |                                                                                                                                                                                                                                                                                                                                                                                                                                              |     |                                                                                                                                                                                                                                                                                                           |   |              |   |              |         |              |         |             |   |              |         |      |
| Missing                    | 1618              |                                                                                                                                                                                                                                                        |                                                                                                                                                                                                                                                                                                                                                                                                                                              |     |                                                                                                                                                                                                                                                                                                           |   |              |   |              |         |              |         |             |   |              |         |      |
|                            | Place             | Orientation towards place was captured based on place of interview, name of the village, street number/colony name/landmark/neighbourhood and name of the district. For each question, the score was 0 (incorrect responses) or 1 (correct responses). | <p>What is this place used for? [plausible answers are specific answers such as living room, house, apartment, hospital, market, etc.]</p> <p>1. Correct<br/>2. Incorrect</p> <p>What is your address? Name of village/town/city</p> <p>1. Correct<br/>2. Incorrect</p> <p>Street number/ colony name/landmark/neighbourhood</p> <p>1. Correct<br/>2. Incorrect</p> <p>What is name of your district?</p> <p>1. Correct<br/>2. Incorrect</p> | 0-4 | <table border="1"> <tbody> <tr> <td>0</td> <td>125 (0.2)</td> </tr> <tr> <td>1</td> <td>419 (0.7)</td> </tr> <tr> <td>2</td> <td>1429 (2.2)</td> </tr> <tr> <td>3</td> <td>6775 (10.7)</td> </tr> <tr> <td>4</td> <td>54818 (86.2)</td> </tr> <tr> <td>Missing</td> <td>1996</td> </tr> </tbody> </table> | 0 | 125 (0.2)    | 1 | 419 (0.7)    | 2       | 1429 (2.2)   | 3       | 6775 (10.7) | 4 | 54818 (86.2) | Missing | 1996 |
| 0                          | 125 (0.2)         |                                                                                                                                                                                                                                                        |                                                                                                                                                                                                                                                                                                                                                                                                                                              |     |                                                                                                                                                                                                                                                                                                           |   |              |   |              |         |              |         |             |   |              |         |      |
| 1                          | 419 (0.7)         |                                                                                                                                                                                                                                                        |                                                                                                                                                                                                                                                                                                                                                                                                                                              |     |                                                                                                                                                                                                                                                                                                           |   |              |   |              |         |              |         |             |   |              |         |      |
| 2                          | 1429 (2.2)        |                                                                                                                                                                                                                                                        |                                                                                                                                                                                                                                                                                                                                                                                                                                              |     |                                                                                                                                                                                                                                                                                                           |   |              |   |              |         |              |         |             |   |              |         |      |
| 3                          | 6775 (10.7)       |                                                                                                                                                                                                                                                        |                                                                                                                                                                                                                                                                                                                                                                                                                                              |     |                                                                                                                                                                                                                                                                                                           |   |              |   |              |         |              |         |             |   |              |         |      |
| 4                          | 54818 (86.2)      |                                                                                                                                                                                                                                                        |                                                                                                                                                                                                                                                                                                                                                                                                                                              |     |                                                                                                                                                                                                                                                                                                           |   |              |   |              |         |              |         |             |   |              |         |      |
| Missing                    | 1996              |                                                                                                                                                                                                                                                        |                                                                                                                                                                                                                                                                                                                                                                                                                                              |     |                                                                                                                                                                                                                                                                                                           |   |              |   |              |         |              |         |             |   |              |         |      |
| <b>Arithmetic function</b> | Backward counting | Respondents were asked to count backward as quickly as possible from the number 20. The respondents were asked to stop after correctly counting backward from 20 to 11 or from 19 to 10. Correct counting                                              | <p>Please try to count backward as quickly as you can from the number, I will give you. I will tell you when to stop. Please start with 20.</p> <p>1. R correctly counted (e.g., 19 – 10; 20 – 11) without error<br/>2. R made an error(s)</p>                                                                                                                                                                                               | 0-2 | <table border="1"> <tbody> <tr> <td>0</td> <td>19815 (31)</td> </tr> <tr> <td>1</td> <td>12274 (19.2)</td> </tr> <tr> <td>2</td> <td>31867 (49.8)</td> </tr> <tr> <td>Missing</td> <td>1606</td> </tr> </tbody> </table>                                                                                  | 0 | 19815 (31)   | 1 | 12274 (19.2) | 2       | 31867 (49.8) | Missing | 1606        |   |              |         |      |
| 0                          | 19815 (31)        |                                                                                                                                                                                                                                                        |                                                                                                                                                                                                                                                                                                                                                                                                                                              |     |                                                                                                                                                                                                                                                                                                           |   |              |   |              |         |              |         |             |   |              |         |      |
| 1                          | 12274 (19.2)      |                                                                                                                                                                                                                                                        |                                                                                                                                                                                                                                                                                                                                                                                                                                              |     |                                                                                                                                                                                                                                                                                                           |   |              |   |              |         |              |         |             |   |              |         |      |
| 2                          | 31867 (49.8)      |                                                                                                                                                                                                                                                        |                                                                                                                                                                                                                                                                                                                                                                                                                                              |     |                                                                                                                                                                                                                                                                                                           |   |              |   |              |         |              |         |             |   |              |         |      |
| Missing                    | 1606              |                                                                                                                                                                                                                                                        |                                                                                                                                                                                                                                                                                                                                                                                                                                              |     |                                                                                                                                                                                                                                                                                                           |   |              |   |              |         |              |         |             |   |              |         |      |

|             |                                                                                                                                                                                                                      |                                                                                                                                                                                                                                                                                                                                                                                                                                                                                                                           |                   |                                                                                                                                                                                                                                                                                                                   |   |              |   |             |   |              |         |             |   |            |   |              |         |      |
|-------------|----------------------------------------------------------------------------------------------------------------------------------------------------------------------------------------------------------------------|---------------------------------------------------------------------------------------------------------------------------------------------------------------------------------------------------------------------------------------------------------------------------------------------------------------------------------------------------------------------------------------------------------------------------------------------------------------------------------------------------------------------------|-------------------|-------------------------------------------------------------------------------------------------------------------------------------------------------------------------------------------------------------------------------------------------------------------------------------------------------------------|---|--------------|---|-------------|---|--------------|---------|-------------|---|------------|---|--------------|---------|------|
|             |                                                                                                                                                                                                                      | received 2 points; counts with a mistake received 1 point. Those who could not count received 0 points.                                                                                                                                                                                                                                                                                                                                                                                                                   | 3. R cannot count |                                                                                                                                                                                                                                                                                                                   |   |              |   |             |   |              |         |             |   |            |   |              |         |      |
| Serial      | Respondents were asked to subtract seven from 100 in the first step and asked to continue subtracting seven from the previous number in each subsequent step for five times. Each correct response received 1 point. | Now let's try some subtraction of numbers. One hundred minus 7 equals what?<br>Enter the answer R gave:<br>1. _____<br>2. R cannot count, skip next questions, and go to 'computation'<br>And 7 from that equals what?<br>[Interviewer: enter the answer R gave]<br>_____<br>And 7 from that equals what?<br>[Interviewer: enter the answer R gave]<br>_____<br>And 7 from that equals what?<br>[Interviewer: enter the answer R gave]<br>_____<br>And 7 from that equals what?<br>[Interviewer: enter the answer R gave] | 0-5               | <table border="1"> <tr><td>0</td><td>21325 (36.5)</td></tr> <tr><td>1</td><td>5131 (8.8)</td></tr> <tr><td>2</td><td>5791 (9.9)</td></tr> <tr><td>3</td><td>7776 (13.3)</td></tr> <tr><td>4</td><td>5778 (9.9)</td></tr> <tr><td>5</td><td>12599 (21.6)</td></tr> <tr><td>Missing</td><td>7162</td></tr> </table> | 0 | 21325 (36.5) | 1 | 5131 (8.8)  | 2 | 5791 (9.9)   | 3       | 7776 (13.3) | 4 | 5778 (9.9) | 5 | 12599 (21.6) | Missing | 7162 |
| 0           | 21325 (36.5)                                                                                                                                                                                                         |                                                                                                                                                                                                                                                                                                                                                                                                                                                                                                                           |                   |                                                                                                                                                                                                                                                                                                                   |   |              |   |             |   |              |         |             |   |            |   |              |         |      |
| 1           | 5131 (8.8)                                                                                                                                                                                                           |                                                                                                                                                                                                                                                                                                                                                                                                                                                                                                                           |                   |                                                                                                                                                                                                                                                                                                                   |   |              |   |             |   |              |         |             |   |            |   |              |         |      |
| 2           | 5791 (9.9)                                                                                                                                                                                                           |                                                                                                                                                                                                                                                                                                                                                                                                                                                                                                                           |                   |                                                                                                                                                                                                                                                                                                                   |   |              |   |             |   |              |         |             |   |            |   |              |         |      |
| 3           | 7776 (13.3)                                                                                                                                                                                                          |                                                                                                                                                                                                                                                                                                                                                                                                                                                                                                                           |                   |                                                                                                                                                                                                                                                                                                                   |   |              |   |             |   |              |         |             |   |            |   |              |         |      |
| 4           | 5778 (9.9)                                                                                                                                                                                                           |                                                                                                                                                                                                                                                                                                                                                                                                                                                                                                                           |                   |                                                                                                                                                                                                                                                                                                                   |   |              |   |             |   |              |         |             |   |            |   |              |         |      |
| 5           | 12599 (21.6)                                                                                                                                                                                                         |                                                                                                                                                                                                                                                                                                                                                                                                                                                                                                                           |                   |                                                                                                                                                                                                                                                                                                                   |   |              |   |             |   |              |         |             |   |            |   |              |         |      |
| Missing     | 7162                                                                                                                                                                                                                 |                                                                                                                                                                                                                                                                                                                                                                                                                                                                                                                           |                   |                                                                                                                                                                                                                                                                                                                   |   |              |   |             |   |              |         |             |   |            |   |              |         |      |
| Computation | This test involved the mathematical operation of division. Respondents were asked to compute the net sale price of a product after considering a discount sale of half of the original price.                        | A shop is having a sale and selling all items at half price. Before the sale, a sari cost 300 Rs. How much will it cost in the sale?<br>1. R gave the correct answer of 150 Rs<br>2. R gave incorrect answer<br>If 5 people all have the winning numbers in the lottery and the prize is 1,000 Rs, how much will each of them get?<br>1. R gave the correct answer of 200 Rs<br>2. R gave incorrect answer                                                                                                                | 0-2               | <table border="1"> <tr><td>0</td><td>5758 (9.3)</td></tr> <tr><td>1</td><td>9856 (15.9)</td></tr> <tr><td>2</td><td>46414 (74.8)</td></tr> <tr><td>Missing</td><td>3534</td></tr> </table>                                                                                                                        | 0 | 5758 (9.3)   | 1 | 9856 (15.9) | 2 | 46414 (74.8) | Missing | 3534        |   |            |   |              |         |      |
| 0           | 5758 (9.3)                                                                                                                                                                                                           |                                                                                                                                                                                                                                                                                                                                                                                                                                                                                                                           |                   |                                                                                                                                                                                                                                                                                                                   |   |              |   |             |   |              |         |             |   |            |   |              |         |      |
| 1           | 9856 (15.9)                                                                                                                                                                                                          |                                                                                                                                                                                                                                                                                                                                                                                                                                                                                                                           |                   |                                                                                                                                                                                                                                                                                                                   |   |              |   |             |   |              |         |             |   |            |   |              |         |      |
| 2           | 46414 (74.8)                                                                                                                                                                                                         |                                                                                                                                                                                                                                                                                                                                                                                                                                                                                                                           |                   |                                                                                                                                                                                                                                                                                                                   |   |              |   |             |   |              |         |             |   |            |   |              |         |      |
| Missing     | 3534                                                                                                                                                                                                                 |                                                                                                                                                                                                                                                                                                                                                                                                                                                                                                                           |                   |                                                                                                                                                                                                                                                                                                                   |   |              |   |             |   |              |         |             |   |            |   |              |         |      |

|                           |                           |                                                                                                                                                                                                                                                         |                                                                                                                                                                                                                                                                                                                                                                                                                                                         |     |         |              |
|---------------------------|---------------------------|---------------------------------------------------------------------------------------------------------------------------------------------------------------------------------------------------------------------------------------------------------|---------------------------------------------------------------------------------------------------------------------------------------------------------------------------------------------------------------------------------------------------------------------------------------------------------------------------------------------------------------------------------------------------------------------------------------------------------|-----|---------|--------------|
| <b>Executive function</b> | Executive (paper folding) | This is a three-stage command task. The respondents were instructed to take a piece of paper from the interviewer, turn it over, fold it in half, and give it back to the interviewer. Three points were given if each task was completed successfully. | When I give you a piece of paper, please turn it over, fold it in half, and give it back to me.<br>1. One of the tasks – turning/folding/returning actions is completed successfully<br>2. Two of the tasks – turning/folding/returning actions are completed successfully<br>3. All of the tasks – turning/folding/returning actions are completed successfully<br>4. None of the tasks – turning/folding/returning actions is completed successfully. | 0-3 | 0       | 3197 (5)     |
|                           |                           |                                                                                                                                                                                                                                                         |                                                                                                                                                                                                                                                                                                                                                                                                                                                         |     | 1       | 12511 (19.5) |
|                           |                           |                                                                                                                                                                                                                                                         |                                                                                                                                                                                                                                                                                                                                                                                                                                                         |     | 2       | 25640 (40)   |
|                           |                           |                                                                                                                                                                                                                                                         |                                                                                                                                                                                                                                                                                                                                                                                                                                                         |     | 3       | 22757 (35.5) |
|                           |                           |                                                                                                                                                                                                                                                         |                                                                                                                                                                                                                                                                                                                                                                                                                                                         |     | Missing | 1457         |
|                           | Pentagon drawing          | Visio-construction is the ability to coordinate fine motor skills with visuospatial abilities, usually by reproducing geometric figures. Respondents were asked to copy two overlapping pentagons and scored 1 point for a correct drawing.             | Do you see this picture? Please draw that picture on this paper. [Show the picture of two pentagons overlapped]<br>1. Drew picture<br>2. Failed to draw picture<br>3. Not applicable.                                                                                                                                                                                                                                                                   | 0-1 | 0       | 31187 (55.5) |
|                           |                           |                                                                                                                                                                                                                                                         |                                                                                                                                                                                                                                                                                                                                                                                                                                                         |     | 1       | 25051 (44.5) |
|                           |                           |                                                                                                                                                                                                                                                         |                                                                                                                                                                                                                                                                                                                                                                                                                                                         |     | Missing | 9324         |
| <b>Object naming</b>      |                           | The interviewer points to a specific object and asks the respondent to name it. Two objects were pointed out and 1 point was given for each correct response.                                                                                           | What is this? [Items can be anything from cell phones, gloves, hats, rings, and umbrella that can be within close reach.]<br>1. Correct<br>2. Incorrect<br>What is this?<br>1. Correct<br>2. Incorrect                                                                                                                                                                                                                                                  | 0-2 | 0       | 646 (1)      |
|                           |                           |                                                                                                                                                                                                                                                         |                                                                                                                                                                                                                                                                                                                                                                                                                                                         |     | 1       | 2509 (3.9)   |
|                           |                           |                                                                                                                                                                                                                                                         |                                                                                                                                                                                                                                                                                                                                                                                                                                                         |     | 2       | 61158 (95.1) |
|                           |                           |                                                                                                                                                                                                                                                         |                                                                                                                                                                                                                                                                                                                                                                                                                                                         |     | Missing | 1249         |

Composite cognition score is the combined score of memory, orientation, arithmetic function, executive function, and object naming and is obtained by summing up the responses for all these items. It ranges from 0-43.

**S4 Table. Characteristics of excluded participants and participants included in various analyses.**

| Characteristic                   | Frailty index based on 40 deficits        |                                                                    |                                                            |                                                 |                                                     | Frailty index defined based on non-missing deficits <sup>#</sup> |                                               |
|----------------------------------|-------------------------------------------|--------------------------------------------------------------------|------------------------------------------------------------|-------------------------------------------------|-----------------------------------------------------|------------------------------------------------------------------|-----------------------------------------------|
|                                  | 45-plus adults with frailty index missing | Study participants (45-plus adults with frailty index non-missing) | Study participants with non-missing hospitalization status | Study participants with non-missing fall status | Study participants with non-missing cognition score | Frailty index missing                                            | 45-plus adults with frailty index non-missing |
|                                  | N = 7,913                                 | N = 57,649                                                         | N = 56,790                                                 | N = 57,642                                      | N = 42,015                                          | N = 1,231                                                        | N = 64,331                                    |
| <b>Sex</b>                       |                                           |                                                                    |                                                            |                                                 |                                                     |                                                                  |                                               |
| <i>Female</i>                    | 4,209 (53%)                               | 30,874 (54%)                                                       | 30,422 (54%)                                               | 30,871 (54%)                                    | 20,767 (49%)                                        | 622 (51%)                                                        | 34,461 (54%)                                  |
| <i>Male</i>                      | 3,704 (47%)                               | 26,775 (46%)                                                       | 26,368 (46%)                                               | 26,771 (46%)                                    | 21,248 (51%)                                        | 609 (49%)                                                        | 29,870 (46%)                                  |
| <b>Age, Median (Q1 – Q3)*</b>    | 61 (52, 70)                               | 58 (50, 66)                                                        | 58 (50, 66)                                                | 58 (50, 66)                                     | 57 (50, 65)                                         | 65 (55, 76)                                                      | 59 (51, 67)                                   |
| <b>Place of residence</b>        |                                           |                                                                    |                                                            |                                                 |                                                     |                                                                  |                                               |
| <i>Rural</i>                     | 4,619 (58%)                               | 37,805 (66%)                                                       | 37,202 (66%)                                               | 37,799 (66%)                                    | 26,212 (62%)                                        | 739 (60%)                                                        | 41,685 (65%)                                  |
| <i>Urban</i>                     | 3,294 (42%)                               | 19,844 (34%)                                                       | 19,588 (34%)                                               | 19,843 (34%)                                    | 15,803 (38%)                                        | 492 (40%)                                                        | 22,646 (35%)                                  |
| <b>Educational status</b>        |                                           |                                                                    |                                                            |                                                 |                                                     |                                                                  |                                               |
| <i>No schooling</i>              | 3,857 (49%)                               | 26,961 (47%)                                                       | 26,488 (47%)                                               | 26,958 (47%)                                    | 16,083 (38%)                                        | 665 (54%)                                                        | 30,153 (47%)                                  |
| <i>Less than 5 years</i>         | 740 (9.4%)                                | 6,738 (12%)                                                        | 6,653 (12%)                                                | 6,736 (12%)                                     | 4,952 (12%)                                         | 137 (11%)                                                        | 7,341 (11%)                                   |
| <i>5 to 9 years</i>              | 1,579 (20%)                               | 13,280 (23%)                                                       | 13,125 (23%)                                               | 13,279 (23%)                                    | 11,155 (27%)                                        | 211 (17%)                                                        | 14,648 (23%)                                  |
| <i>10 years or more</i>          | 1,734 (22%)                               | 10,670 (19%)                                                       | 10,524 (19%)                                               | 10,669 (19%)                                    | 9,825 (23%)                                         | 216 (18%)                                                        | 12,188 (19%)                                  |
| Missing                          | 3                                         |                                                                    |                                                            |                                                 |                                                     | 2                                                                | 1                                             |
| <b>MPCE quintile<sup>†</sup></b> |                                           |                                                                    |                                                            |                                                 |                                                     |                                                                  |                                               |
| <i>Poorest</i>                   | 1,583 (20%)                               | 11,358 (20%)                                                       | 11,174 (20%)                                               | 11,356 (20%)                                    | 7,923 (19%)                                         | 289 (23%)                                                        | 12,652 (20%)                                  |
| <i>Poorer</i>                    | 1,517 (19%)                               | 11,673 (20%)                                                       | 11,487 (20%)                                               | 11,673 (20%)                                    | 8,336 (20%)                                         | 258 (21%)                                                        | 12,932 (20%)                                  |
| <i>Middle</i>                    | 1,487 (19%)                               | 11,676 (20%)                                                       | 11,500 (20%)                                               | 11,674 (20%)                                    | 8,405 (20%)                                         | 235 (19%)                                                        | 12,928 (20%)                                  |
| <i>Richer</i>                    | 1,577 (20%)                               | 11,633 (20%)                                                       | 11,451 (20%)                                               | 11,631 (20%)                                    | 8,727 (21%)                                         | 222 (18%)                                                        | 12,988 (20%)                                  |
| <i>Richest</i>                   | 1,749 (22%)                               | 11,309 (20%)                                                       | 11,178 (20%)                                               | 11,308 (20%)                                    | 8,624 (21%)                                         | 227 (18%)                                                        | 12,831 (20%)                                  |
| <b>Living arrangement</b>        |                                           |                                                                    |                                                            |                                                 |                                                     |                                                                  |                                               |
| <i>Living alone</i>              | 279 (3.5%)                                | 2,034 (3.5%)                                                       | 2,008 (3.5%)                                               | 2,034 (3.5%)                                    | 1,302 (3.1%)                                        | 40 (3.2%)                                                        | 2,273 (3.5%)                                  |

|                                                       |             |              |              |              |              |             |              |
|-------------------------------------------------------|-------------|--------------|--------------|--------------|--------------|-------------|--------------|
| <i>Living with spouse with or without children</i>    | 5,270 (67%) | 42,607 (74%) | 41,988 (74%) | 42,604 (74%) | 32,345 (77%) | 689 (56%)   | 47,188 (73%) |
| <i>Living with children and others</i>                | 1,732 (22%) | 10,709 (19%) | 10,527 (19%) | 10,706 (19%) | 6,786 (16%)  | 272 (22%)   | 12,169 (19%) |
| <i>Living with others only</i>                        | 632 (8.0%)  | 2,299 (4.0%) | 2,267 (4.0%) | 2,298 (4.0%) | 1,582 (3.8%) | 230 (19%)   | 2,701 (4.2%) |
| <b>Employment</b>                                     |             |              |              |              |              |             |              |
| <i>Currently working<sup>§</sup></i>                  | 3,340 (42%) | 28,939 (50%) | 28,526 (50%) | 28,935 (50%) | 22,168 (53%) | 377 (31%)   | 31,902 (50%) |
| <i>Worked in the past</i>                             | 2,236 (28%) | 13,045 (23%) | 12,819 (23%) | 13,043 (23%) | 9,069 (22%)  | 481 (39%)   | 14,800 (23%) |
| <i>Never worked</i>                                   | 2,327 (29%) | 15,665 (27%) | 15,445 (27%) | 15,664 (27%) | 10,778 (26%) | 365 (30%)   | 17,627 (27%) |
| Missing                                               | 10          |              |              |              |              | 8           | 2            |
| <b>Food constraint<sup>¶</sup></b>                    |             |              |              |              |              |             |              |
| <i>No</i>                                             | 7,360 (93%) | 53,801 (93%) | 53,018 (93%) | 53,797 (93%) | 39,582 (94%) | 1,178 (96%) | 59,983 (93%) |
| <i>Yes</i>                                            | 553 (7.0%)  | 3,848 (6.7%) | 3,772 (6.6%) | 3,845 (6.7%) | 2,433 (5.8%) | 53 (4.3%)   | 4,348 (6.8%) |
| <b>Tobacco use</b>                                    |             |              |              |              |              |             |              |
| <i>Never used tobacco</i>                             | 4,894 (66%) | 36,252 (63%) | 35,747 (63%) | 36,249 (63%) | 26,313 (63%) | 451 (61%)   | 40,695 (63%) |
| <i>Current/past user</i>                              | 2,469 (34%) | 21,373 (37%) | 21,023 (37%) | 21,369 (37%) | 15,681 (37%) | 285 (39%)   | 23,557 (37%) |
| Missing                                               | 550         | 24           | 20           | 24           | 21           | 495         | 79           |
| <b>Alcohol</b>                                        |             |              |              |              |              |             |              |
| <i>Never consumed</i>                                 | 6,072 (82%) | 47,218 (82%) | 46,516 (82%) | 47,216 (82%) | 34,223 (81%) | 620 (84%)   | 52,670 (82%) |
| <i>Less than once a month in past 3 months</i>        | 738 (10%)   | 6,024 (10%)  | 5,914 (10%)  | 6,020 (10%)  | 4,642 (11%)  | 96 (13%)    | 6,666 (10%)  |
| <i>One to three days per month or more frequently</i> | 559 (7.6%)  | 4,397 (7.6%) | 4,354 (7.7%) | 4,396 (7.6%) | 3,145 (7.5%) | 21 (2.8%)   | 4,935 (7.7%) |
| Missing                                               | 544         | 10           | 6            | 10           | 5            | 494         | 60           |
| <b>Caste</b>                                          |             |              |              |              |              |             |              |
| <i>Scheduled caste</i>                                | 1,264 (16%) | 9,695 (17%)  | 9,515 (17%)  | 9,695 (17%)  | 6,854 (16%)  | 195 (16%)   | 10,764 (17%) |
| <i>Scheduled tribe</i>                                | 1,225 (15%) | 10,140 (18%) | 10,041 (18%) | 10,137 (18%) | 6,514 (16%)  | 211 (17%)   | 11,154 (17%) |

|                                                               |             |              |              |              |              |           |              |
|---------------------------------------------------------------|-------------|--------------|--------------|--------------|--------------|-----------|--------------|
| <i>Other backward class</i>                                   | 2,816 (36%) | 21,813 (38%) | 21,448 (38%) | 21,810 (38%) | 16,190 (39%) | 432 (35%) | 24,197 (38%) |
| <i>None of the above/No caste or tribe/Don't know/Missing</i> | 2,608 (33%) | 16,001 (28%) | 15,786 (28%) | 16,000 (28%) | 12,457 (30%) | 393 (32%) | 18,216 (28%) |
| <b>Religion</b>                                               |             |              |              |              |              |           |              |
| <i>Hindu</i>                                                  | 5,777 (73%) | 42,322 (73%) | 41,579 (73%) | 42,320 (73%) | 31,313 (75%) | 870 (71%) | 47,229 (73%) |
| <i>Muslim</i>                                                 | 997 (13%)   | 6,806 (12%)  | 6,724 (12%)  | 6,805 (12%)  | 4,834 (12%)  | 166 (13%) | 7,637 (12%)  |
| <i>Christian</i>                                              | 734 (9.3%)  | 5,802 (10%)  | 5,787 (10%)  | 5,800 (10%)  | 3,831 (9.1%) | 140 (11%) | 6,396 (9.9%) |
| <i>Other</i>                                                  | 405 (5.1%)  | 2,719 (4.7%) | 2,700 (4.8%) | 2,717 (4.7%) | 2,037 (4.8%) | 55 (4.5%) | 3,069 (4.8%) |
| <b>Region</b>                                                 |             |              |              |              |              |           |              |
| <i>North</i>                                                  | 1,429 (18%) | 10,537 (18%) | 10,222 (18%) | 10,535 (18%) | 8,015 (19%)  | 186 (15%) | 11,780 (18%) |
| <i>Central</i>                                                | 932 (12%)   | 7,975 (14%)  | 7,654 (13%)  | 7,975 (14%)  | 5,940 (14%)  | 167 (14%) | 8,740 (14%)  |
| <i>East</i>                                                   | 1,137 (14%) | 10,443 (18%) | 10,443 (18%) | 10,441 (18%) | 7,979 (19%)  | 189 (15%) | 11,391 (18%) |
| <i>Northeast</i>                                              | 962 (12%)   | 7,551 (13%)  | 7,546 (13%)  | 7,550 (13%)  | 5,191 (12%)  | 150 (12%) | 8,363 (13%)  |
| <i>West</i>                                                   | 1,314 (17%) | 7,580 (13%)  | 7,449 (13%)  | 7,579 (13%)  | 5,231 (12%)  | 223 (18%) | 8,671 (13%)  |
| <i>South</i>                                                  | 2,139 (27%) | 13,563 (24%) | 13,476 (24%) | 13,562 (24%) | 9,659 (23%)  | 316 (26%) | 15,386 (24%) |

Numbers presented in table are unweighted.

\* Q1: first quartile, Q3: third quartile.

† MPCE: monthly per capita expenditure which is defined as total monthly household consumption expenditure divided by household size. It includes household's per capita spending on food and non-food items including spending on health, education, utilities, etc.

§ Includes Temporarily laid off, on sick or other leave, or in job training

¶ Household food unavailability in the past 12 months, where household members either reduced their meal size, did not eat even though they were hungry, or did not eat for a whole day because enough food was not available in the household.

#Frailty index for an individual was calculated by summing the non-missing health deficit scores and then dividing by the total number of deficits measured in that individual (up to 3 were allowed to be missing).



**S5 Table. Prevalence of frailty, overall and by participants' background characteristics.**

| Characteristic                                 | All               | 45-60 years       | 60-plus years     |
|------------------------------------------------|-------------------|-------------------|-------------------|
| <b>Overall</b>                                 | 29.5 (28.7, 30.4) | 16.2 (15.4, 16.9) | 43.2 (41.9, 44.4) |
| <b>Sex</b>                                     |                   |                   |                   |
| Female                                         | 36.1 (34.9, 37.4) | 21.4 (20.2, 22.6) | 52.2 (50.4, 54.1) |
| Male                                           | 21.7 (20.8, 22.7) | 9.6 (8.5, 10.6)   | 33.2 (31.8, 34.6) |
| <b>5-year age group</b>                        |                   |                   |                   |
| 45-49                                          | 11.6 (10.5, 12.7) | 11.6 (10.5, 12.7) | -                 |
| 50-54                                          | 16.3 (14.8, 17.7) | 16.3 (14.8, 17.7) | -                 |
| 55-59                                          | 21.8 (20.1, 23.5) | 21.8 (20.1, 23.5) | -                 |
| 60-64                                          | 29.9 (28.4, 31.5) | -                 | 29.9 (28.4, 31.5) |
| 65-69                                          | 39 (36.3, 41.7)   | -                 | 39 (36.3, 41.7)   |
| 70-74                                          | 52.5 (49.3, 55.8) | -                 | 52.5 (49.3, 55.8) |
| 75-79                                          | 53.9 (50.4, 57.3) | -                 | 53.9 (50.4, 57.3) |
| 80-plus                                        | 67.9 (64.2, 71.6) | -                 | 67.9 (64.2, 71.6) |
| <b>Place of residence</b>                      |                   |                   |                   |
| Rural                                          | 30.8 (30.1, 31.5) | 17.5 (16.7, 18.3) | 43.7 (42.6, 44.8) |
| Urban                                          | 26.5 (24.3, 28.8) | 13.2 (11.5, 14.9) | 41.8 (38.3, 45.2) |
| <b>Educational status</b>                      |                   |                   |                   |
| No schooling                                   | 35.3 (34.4, 36.3) | 19.8 (18.7, 20.9) | 48 (46.6, 49.4)   |
| Less than 5 years                              | 34.2 (32.1, 36.2) | 19.7 (17.6, 21.8) | 47.6 (44.5, 50.8) |
| 5 to 9 years                                   | 24.7 (22.6, 26.9) | 15.1 (13.4, 16.8) | 37.4 (33.5, 41.3) |
| 10 years or more                               | 15.5 (12.8, 18.2) | 7.9 (6.3, 9.4)    | 27.3 (21.9, 32.7) |
| <b>MPCE fifths<sup>*</sup></b>                 |                   |                   |                   |
| Poorest                                        | 29.8 (28.4, 31.2) | 15 (13.4, 16.6)   | 44.3 (42.1, 46.4) |
| Poorer                                         | 29.9 (28.6, 31.3) | 16.9 (15.3, 18.4) | 42.9 (40.8, 45)   |
| Middle                                         | 28.8 (27.2, 30.4) | 16.1 (14.5, 17.7) | 41.2 (38.8, 43.6) |
| Richer                                         | 30.6 (28.2, 33)   | 17.4 (15.2, 19.6) | 44.1 (40.6, 47.7) |
| Richest                                        | 28.3 (25.7, 30.9) | 15.5 (13.6, 17.3) | 43.4 (39.4, 47.3) |
| <b>Living arrangement</b>                      |                   |                   |                   |
| Living alone                                   | 46.4 (42.8, 50)   | 22.7 (17.9, 27.5) | 53.7 (49.5, 57.9) |
| Living with spouse with or without children    | 24.2 (23.4, 24.9) | 15.5 (14.6, 16.3) | 36.2 (35, 37.5)   |
| Living with children and others                | 45.4 (42.9, 47.9) | 21.4 (19.2, 23.6) | 55.2 (52.3, 58.1) |
| Living with others only                        | 36 (31, 41)       | 13.1 (8.5, 17.8)  | 50.9 (46.7, 55.1) |
| <b>Employment</b>                              |                   |                   |                   |
| Currently working <sup>†</sup>                 | 18.4 (17.6, 19.3) | 12.4 (11.5, 13.3) | 29.3 (27.8, 30.8) |
| Worked in the past                             | 45.9 (44.4, 47.4) | 29.9 (27.3, 32.5) | 50.2 (48.5, 51.9) |
| Never worked                                   | 36.5 (34.2, 38.8) | 20.5 (18.6, 22.3) | 52.9 (49.8, 56)   |
| <b>Food constraint<sup>§</sup></b>             |                   |                   |                   |
| No                                             | 28.3 (27.4, 29.2) | 15.2 (14.4, 16)   | 41.8 (40.4, 43.1) |
| Yes                                            | 44.1 (41.7, 46.5) | 28.2 (25.2, 31.2) | 58.4 (55, 61.7)   |
| <b>Tobacco use</b>                             |                   |                   |                   |
| Never used tobacco                             | 30.2 (29, 31.4)   | 17.1 (16, 18.2)   | 45 (43.1, 46.8)   |
| Current/past user                              | 28.3 (27.3, 29.3) | 14.4 (13.4, 15.4) | 40.5 (39, 42)     |
| <b>Alcohol use</b>                             |                   |                   |                   |
| Never consumed                                 | 31 (30, 31.9)     | 17.2 (16.3, 18.1) | 44.9 (43.5, 46.3) |
| Less than once a month in past 3 months        | 23.5 (21.8, 25.2) | 11.6 (9.8, 13.3)  | 35.1 (32.2, 37.9) |
| One to three days per month or more frequently | 18.1 (16.2, 19.9) | 9 (7.4, 10.5)     | 29.6 (26, 33.1)   |

|                                                        |                   |                   |                   |
|--------------------------------------------------------|-------------------|-------------------|-------------------|
| <b>Caste</b>                                           |                   |                   |                   |
| Scheduled caste                                        | 29.9 (28.5, 31.4) | 17.9 (16.3, 19.5) | 42.9 (40.6, 45.2) |
| Scheduled tribe                                        | 23.9 (22.1, 25.7) | 12.9 (11.2, 14.6) | 36.6 (33.5, 39.8) |
| Other backward class                                   | 30 (28.4, 31.6)   | 15.5 (14.1, 16.8) | 44.8 (42.5, 47.1) |
| None of the above/No caste or tribe/Don't know/Missing | 30.2 (29.1, 31.3) | 17.2 (16, 18.5)   | 42.5 (40.8, 44.2) |
| <b>Religion</b>                                        |                   |                   |                   |
| Hindu                                                  | 29.1 (28.2, 30.1) | 15.4 (14.6, 16.2) | 43.1 (41.6, 44.5) |
| Muslim                                                 | 34.4 (32.2, 36.6) | 23.4 (20, 26.7)   | 46.1 (43.3, 49)   |
| Christian                                              | 24 (19.5, 28.4)   | 10.5 (6.7, 14.3)  | 39.2 (34.7, 43.7) |
| Other                                                  | 28.2 (25.4, 31.1) | 16.4 (13.1, 19.7) | 39.3 (35, 43.6)   |
| <b>Region</b>                                          |                   |                   |                   |
| North                                                  | 23.6 (22.5, 24.8) | 12 (10.8, 13.2)   | 34.9 (33.1, 36.8) |
| Central                                                | 27.2 (25.7, 28.6) | 14.4 (12.9, 15.8) | 40 (37.7, 42.3)   |
| East                                                   | 33.2 (31.9, 34.5) | 20.5 (19, 22.1)   | 45.7 (43.7, 47.7) |
| Northeast                                              | 19.8 (18.3, 21.2) | 8.8 (7.5, 10.1)   | 34.7 (32.1, 37.3) |
| West                                                   | 32.2 (30.6, 33.8) | 18.6 (16.8, 20.3) | 45 (42.5, 47.6)   |
| South                                                  | 30.6 (27.8, 33.5) | 15.2 (13, 17.5)   | 47.9 (43.9, 51.9) |

Numbers presented in table are weighted, using national-level individual sampling weights provided in data.

\* MPCE: monthly per capita expenditure which is defined as total monthly household consumption expenditure divided by household size. It includes household's per capita spending on food and non-food items including spending on health, education, utilities, etc.

† Includes Temporarily laid off, on sick or other leave, or in job training

§ Household food unavailability in the past 12 months, where household members either reduced their meal size, did not eat even though they were hungry, or did not eat for a whole day because enough food was not available in the household.

S6 Table. Sex differences in distribution of frailty deficit scores.

|                                                              | 45-59 years           |                     | 60-plus years         |                     |
|--------------------------------------------------------------|-----------------------|---------------------|-----------------------|---------------------|
|                                                              | Female, N =<br>18,717 | Male, N =<br>15,381 | Female, N =<br>16,366 | Male, N =<br>15,098 |
| <b>Self-reported general Health</b>                          |                       |                     |                       |                     |
| 0 (very good)                                                | 851 (4.6%)            | 1,167 (7.6%)        | 416 (2.6%)            | 616 (4.2%)          |
| 0.25 (good)                                                  | 7,280 (39%)           | 7,076 (46%)         | 4,418 (28%)           | 4,854 (33%)         |
| 0.5 (fair)                                                   | 8,003 (43%)           | 5,540 (36%)         | 7,160 (45%)           | 6,221 (42%)         |
| 0.75 (poor)                                                  | 2,265 (12%)           | 1,342 (8.8%)        | 3,541 (22%)           | 2,663 (18%)         |
| 1 (very poor)                                                | 195 (1.0%)            | 138 (0.9%)          | 485 (3.0%)            | 424 (2.9%)          |
| <b>Self-reported medically diagnosed conditions</b>          |                       |                     |                       |                     |
| Arthritis                                                    | 1,568 (8.4%)          | 704 (4.6%)          | 1,833 (11%)           | 1,222 (8.1%)        |
| Stroke                                                       | 128 (0.7%)            | 225 (1.5%)          | 347 (2.1%)            | 495 (3.3%)          |
| Angina                                                       | 1,313 (7.0%)          | 656 (4.3%)          | 1,232 (7.5%)          | 804 (5.3%)          |
| Diabetes                                                     | 1,968 (11%)           | 1,601 (10%)         | 2,416 (15%)           | 2,444 (16%)         |
| COPD                                                         | 116 (0.6%)            | 143 (0.9%)          | 213 (1.3%)            | 252 (1.7%)          |
| Asthma                                                       | 482 (2.6%)            | 414 (2.7%)          | 792 (4.8%)            | 873 (5.8%)          |
| Depression                                                   | 1,278 (6.9%)          | 732 (4.8%)          | 1,162 (7.3%)          | 886 (6.0%)          |
| Hypertension                                                 | 7,758 (42%)           | 6,058 (40%)         | 9,524 (58%)           | 7,803 (52%)         |
| Cataract                                                     | 1,027 (5.5%)          | 553 (3.6%)          | 3,646 (22%)           | 2,862 (19%)         |
| <b>Medical symptoms</b>                                      |                       |                     |                       |                     |
| Bodily aches or pains                                        | 5,300 (28%)           | 2,751 (18%)         | 5,331 (33%)           | 3,660 (24%)         |
| Problem with sleeping                                        | 2,060 (11%)           | 1,369 (8.9%)        | 2,449 (15%)           | 1,908 (13%)         |
| Difficulty with distance vision                              |                       |                     |                       |                     |
| 0                                                            | 1,255 (6.7%)          | 1,559 (10%)         | 542 (3.3%)            | 786 (5.2%)          |
| 0.25                                                         | 8,181 (44%)           | 7,683 (50%)         | 4,716 (29%)           | 5,206 (35%)         |
| 0.5                                                          | 7,340 (39%)           | 5,011 (33%)         | 7,311 (45%)           | 6,329 (42%)         |
| 0.75                                                         | 1,772 (9.5%)          | 991 (6.5%)          | 3,318 (20%)           | 2,391 (16%)         |
| 1                                                            | 106 (0.6%)            | 90 (0.6%)           | 444 (2.7%)            | 326 (2.2%)          |
| Difficulty with near vision                                  |                       |                     |                       |                     |
| 0                                                            | 922 (4.9%)            | 1,105 (7.2%)        | 520 (3.2%)            | 715 (4.8%)          |
| 0.25                                                         | 7,019 (38%)           | 6,310 (41%)         | 4,477 (27%)           | 4,937 (33%)         |
| 0.5                                                          | 7,962 (43%)           | 5,803 (38%)         | 7,646 (47%)           | 6,613 (44%)         |
| 0.75                                                         | 2,580 (14%)           | 1,970 (13%)         | 3,228 (20%)           | 2,420 (16%)         |
| 1                                                            | 156 (0.8%)            | 140 (0.9%)          | 436 (2.7%)            | 340 (2.3%)          |
| <b>Functional assessment (difficulty with the following)</b> |                       |                     |                       |                     |
| Walking 100 yards                                            | 3,103 (17%)           | 1,381 (9.0%)        | 6,250 (38%)           | 4,048 (27%)         |
| Sitting for 2 hours or more                                  | 4,717 (25%)           | 2,385 (16%)         | 7,270 (45%)           | 4,815 (32%)         |
| Getting up from a chair after sitting for long period        | 5,087 (27%)           | 2,559 (17%)         | 7,894 (48%)           | 5,387 (36%)         |
| Climbing one flight of stairs without resting                | 6,870 (37%)           | 3,350 (22%)         | 10,060 (62%)          | 7,148 (48%)         |

|                                                                         |              |              |              |              |
|-------------------------------------------------------------------------|--------------|--------------|--------------|--------------|
| Stooping, kneeling or crouching                                         | 7,445 (40%)  | 3,838 (25%)  | 10,144 (62%) | 7,483 (50%)  |
| Reaching or extending arms above shoulder level (either arm)            | 1,819 (9.8%) | 964 (6.3%)   | 3,944 (24%)  | 2,390 (16%)  |
| Pulling or pushing large objects                                        | 6,027 (32%)  | 2,717 (18%)  | 9,583 (59%)  | 6,471 (43%)  |
| Lifting or carrying weights over 5 kilos, like a heavy bag of groceries | 3,583 (19%)  | 1,419 (9.3%) | 7,439 (46%)  | 4,374 (29%)  |
| Picking up a coin from a table                                          | 563 (3.0%)   | 296 (1.9%)   | 1,950 (12%)  | 1,220 (8.1%) |
| <b>ADL/IADL* limitations (difficulty with the following)</b>            |              |              |              |              |
| Dressing, including putting on chappals, shoes, etc                     | 440 (2.4%)   | 292 (1.9%)   | 1,282 (7.9%) | 891 (5.9%)   |
| Walking across a room                                                   | 380 (2.0%)   | 208 (1.4%)   | 1,339 (8.2%) | 888 (5.9%)   |
| Bathing                                                                 | 326 (1.7%)   | 249 (1.6%)   | 1,318 (8.1%) | 926 (6.2%)   |
| Eating                                                                  | 390 (2.1%)   | 237 (1.5%)   | 1,394 (8.5%) | 924 (6.2%)   |
| Getting in or out of bed                                                | 864 (4.6%)   | 395 (2.6%)   | 2,024 (12%)  | 1,286 (8.6%) |
| Using the toilet, including getting up and down                         | 1,265 (6.8%) | 630 (4.1%)   | 2,868 (18%)  | 1,987 (13%)  |
| Preparing a hot meal (cooking and serving)                              | 810 (4.3%)   | 669 (4.4%)   | 2,963 (18%)  | 2,212 (15%)  |
| Shopping for groceries                                                  | 1,551 (8.3%) | 630 (4.1%)   | 4,323 (26%)  | 2,361 (16%)  |
| Making telephone calls                                                  | 2,966 (16%)  | 969 (6.3%)   | 5,270 (32%)  | 2,838 (19%)  |
| Taking medications                                                      | 1,194 (6.4%) | 486 (3.2%)   | 2,803 (17%)  | 1,515 (10%)  |
| Doing work around the house or garden                                   | 1,728 (9.3%) | 700 (4.6%)   | 4,598 (28%)  | 2,765 (18%)  |
| Managing money, such as paying bills and keeping track of expenses      | 2,468 (13%)  | 604 (3.9%)   | 5,127 (31%)  | 2,283 (15%)  |
| Getting around or finding address in unfamiliar place                   | 3,041 (16%)  | 726 (4.7%)   | 5,677 (35%)  | 2,437 (16%)  |
| <b>Any form of mental impairment</b>                                    | 266 (1.4%)   | 199 (1.3%)   | 431 (2.6%)   | 326 (2.2%)   |
| <b>Body mass index</b>                                                  |              |              |              |              |
| 0 (normal)                                                              | 8,197 (48%)  | 7,967 (58%)  | 7,118 (49%)  | 7,590 (56%)  |
| 0.5 (underweight/overweight)                                            | 4,531 (26%)  | 3,136 (23%)  | 2,936 (20%)  | 2,249 (17%)  |
| 1 (obese)                                                               | 4,461 (26%)  | 2,731 (20%)  | 4,487 (31%)  | 3,670 (27%)  |
| <b>Weak grip strength</b>                                               | 7,279 (43%)  | 6,807 (49%)  | 10,265 (71%) | 10,962 (82%) |
| <b>Slow gait speed</b>                                                  | 83 (0.5%)    | 48 (0.3%)    | 807 (5.7%)   | 351 (2.6%)   |

\*ADL: Activities of Daily Living; IADL: Instrumental Activities of Daily Living

**S7 Table. Sex-specific associations between frailty and adverse outcomes.**

| Outcome                        | 45-59 years         |                       |                              | 60-plus years       |                       |                              |
|--------------------------------|---------------------|-----------------------|------------------------------|---------------------|-----------------------|------------------------------|
|                                | Male<br>OR (95% CI) | Female<br>OR (95% CI) | Female:Male<br>ROR (95% CI)* | Male<br>OR (95% CI) | Female<br>OR (95% CI) | Female:Male<br>ROR (95% CI)* |
| Hospitalized in last 12 months | 2.22 (1.91, 2.58)   | 2.6 (2.11, 3.21)      | 1.17 (0.91, 1.52)            | 2.13 (1.84, 2.46)   | 2.27 (1.97, 2.61)     | 1.07 (0.87, 1.31)            |
| Fallen down in last 2 years    | 2.15 (1.96, 2.37)   | 2.17 (1.86, 2.54)     | 1.01 (0.84, 1.21)            | 1.75 (1.6, 1.91)    | 2.06 (1.86, 2.29)     | 1.18 (1.03, 1.35)            |
| Poor cognition                 | 1.29 (1.1, 1.5)     | 1.44 (1.00, 2.06)     | 1.12 (0.75, 1.66)            | 1.35 (1.19, 1.52)   | 1.56 (1.31, 1.86)     | 1.16 (0.93, 1.44)            |

\* ROR, ratio of odds ratios, indicating the sex difference in the relationship between frailty and adverse outcomes. For example, odds ratios of 2.6 and 2.22 for females and males, respectively, and a female:male ROR of 1.17 for hospitalization indicates that odds of hospitalization are higher for frail adults in both sexes, but the relative increase is 17% higher in females.

**S8 Table. Summary of different frailty measures, by sex and age groups.**

|         | Frailty index        |                      |                      | Frail: frailty index $\geq 0.25$ |                      |                      | Frail: frailty index $> 0.21$ |                      |                      | Frail: Frailty index based on non-missing deficits* $\geq 0.25$ |                      |                      |
|---------|----------------------|----------------------|----------------------|----------------------------------|----------------------|----------------------|-------------------------------|----------------------|----------------------|-----------------------------------------------------------------|----------------------|----------------------|
|         | 45-59 years          | 60-plus years        | Overall              | 45-59 years                      | 60-plus years        | Overall              | 45-59 years                   | 60-plus years        | Overall              | 45-59 years                                                     | 60-plus years        | Overall              |
|         | (N=30568)            | (N=27081)            | (N=57649)            | (N=30568)                        | (N=27081)            | (N=57649)            | (N=30568)                     | (N=27081)            | (N=57649)            | (N=33674)                                                       | (N=30657)            | (N=64331)            |
| Overall | 0.14<br>(0.14, 0.15) | 0.24<br>(0.24, 0.25) | 0.19<br>(0.19, 0.2)  | 16.2<br>(15.4, 16.9)             | 43.2<br>(41.9, 44.4) | 29.5<br>(28.7, 30.4) | 22.6<br>(21.7, 23.6)          | 52.2<br>(51, 53.4)   | 37.2<br>(36.4, 38.1) | 16.7<br>(15.7, 17.7)                                            | 44.5<br>(43.3, 45.6) | 30.5<br>(29.7, 31.4) |
| Male    | 0.12<br>(0.12, 0.12) | 0.21<br>(0.21, 0.22) | 0.17<br>(0.16, 0.17) | 9.6 (8.5, 10.6)                  | 33.2<br>(31.8, 34.6) | 21.7<br>(20.8, 22.7) | 13.8<br>(12.7, 15)            | 42.2<br>(40.7, 43.6) | 28.4<br>(27.3, 29.4) | 10.8<br>(8.9, 12.6)                                             | 34.8<br>(33.4, 36.1) | 23.1<br>(22, 24.2)   |
| Female  | 0.17<br>(0.16, 0.17) | 0.27<br>(0.27, 0.28) | 0.22<br>(0.21, 0.22) | 21.4<br>(20.2, 22.6)             | 52.2<br>(50.4, 54.1) | 36.1<br>(34.9, 37.4) | 29.6<br>(28.2, 31)            | 61.3<br>(59.6, 63)   | 44.8<br>(43.5, 46.1) | 21.5<br>(20.3, 22.6)                                            | 53.1<br>(51.5, 54.8) | 36.8<br>(35.6, 38)   |

\*Frailty index for an individual was calculated by summing the non-missing health deficit scores and then dividing by the total number of deficits measured in that individual (up to 3 were allowed to be missing). CI: confidence interval

**S9 Table. Association (OR(95% CI)) between frailty (alternative definitions) and adverse outcomes.**

| Outcome                           | Frail: frailty index > 0.21 |                            | Frail: Frailty index based on non-missing deficits* $\geq$ 0.25 |                            |
|-----------------------------------|-----------------------------|----------------------------|-----------------------------------------------------------------|----------------------------|
|                                   | 45-59 years (N= 30568)      | $\geq$ 60 years (N= 27081) | 45-59 years (N33674)                                            | $\geq$ 60 years (N= 30657) |
| Hospitalization in last 12 months | 2.26 (2.02, 2.53)           | 2.11 (1.9, 2.33)           | 2.58 (2.31, 2.88)                                               | 2.37 (2.16, 2.6)           |
| Any fall in last 2 years          | 1.99 (1.85, 2.14)           | 1.88 (1.76, 2.01)          | 2.18 (2.02, 2.36)                                               | 1.97 (1.85, 2.09)          |
| Poor cognition                    | 1.99 (1.85, 2.14)           | 1.35 (1.22, 1.5)           | 1.35 (1.19, 1.55)                                               | 1.42 (1.3, 1.56)           |

\*Frailty index for an individual was calculated by summing the non-missing health deficit scores and then dividing by the total number of deficits measured in that individual (up to 3 were allowed to be missing).

**S10 Table. Distribution of frailty deficit scores in middle-aged and older adults, frail and overall.**

|                                                     | 45-59 years           |                    | 60-plus years         |                     |
|-----------------------------------------------------|-----------------------|--------------------|-----------------------|---------------------|
|                                                     | Overall<br>N = 34,098 | Frail<br>N = 4,302 | Overall<br>N = 31,464 | Frail<br>N = 10,580 |
| <b>Self-reported general Health</b>                 |                       |                    |                       |                     |
| 0 (very good)                                       | 2,018 (6.0%)          | 59 (1.4%)          | 1,032 (3.4%)          | 123 (1.2%)          |
| 0.25 (good)                                         | 14,356 (42%)          | 677 (16%)          | 9,272 (30%)           | 1,697 (16%)         |
| 0.5 (fair)                                          | 13,543 (40%)          | 2,063 (48%)        | 13,381 (43%)          | 4,740 (45%)         |
| 0.75 (poor)                                         | 3,607 (11%)           | 1,331 (31%)        | 6,204 (20%)           | 3,490 (33%)         |
| 1 (very poor)                                       | 333 (1.0%)            | 172 (4.0%)         | 909 (3.0%)            | 530 (5.0%)          |
| <b>Self-reported medically diagnosed conditions</b> |                       |                    |                       |                     |
| Arthritis                                           | 2,272 (6.7%)          | 869 (20%)          | 3,055 (9.7%)          | 1,765 (17%)         |
| Stroke                                              | 353 (1.0%)            | 126 (2.9%)         | 842 (2.7%)            | 433 (4.1%)          |
| Angina                                              | 1,969 (5.8%)          | 679 (16%)          | 2,036 (6.5%)          | 1,122 (11%)         |
| Diabetes                                            | 3,569 (10%)           | 826 (19%)          | 4,860 (15%)           | 2,058 (19%)         |
| COPD                                                | 259 (0.8%)            | 81 (1.9%)          | 465 (1.5%)            | 233 (2.2%)          |
| Asthma                                              | 896 (2.6%)            | 280 (6.5%)         | 1,665 (5.3%)          | 860 (8.1%)          |
| Depression                                          | 2,010 (6.0%)          | 719 (17%)          | 2,048 (6.7%)          | 1,198 (11%)         |
| Hypertension                                        | 13,816 (41%)          | 2,440 (57%)        | 17,327 (55%)          | 6,895 (65%)         |
| Cataract                                            | 1,580 (4.6%)          | 473 (11%)          | 6,508 (21%)           | 3,101 (29%)         |
| <b>Medical symptoms</b>                             |                       |                    |                       |                     |
| Bodily aches or pains                               | 8,051 (24%)           | 2,352 (55%)        | 8,991 (29%)           | 4,749 (45%)         |
| Problem with sleeping                               | 3,429 (10%)           | 1,171 (27%)        | 4,357 (14%)           | 2,428 (23%)         |
| Difficulty with distance vision                     |                       |                    |                       |                     |
| 0                                                   | 2,814 (8.3%)          | 187 (4.3%)         | 1,328 (4.2%)          | 243 (2.3%)          |
| 0.25                                                | 15,864 (47%)          | 1,329 (31%)        | 9,922 (32%)           | 2,297 (22%)         |

|                                                                         |              |             |              |             |
|-------------------------------------------------------------------------|--------------|-------------|--------------|-------------|
| 0.5                                                                     | 12,351 (36%) | 1,917 (45%) | 13,640 (43%) | 4,736 (45%) |
| 0.75                                                                    | 2,763 (8.1%) | 806 (19%)   | 5,709 (18%)  | 2,880 (27%) |
| 1                                                                       | 196 (0.6%)   | 63 (1.5%)   | 770 (2.5%)   | 424 (4.0%)  |
| <b>Difficulty with near vision</b>                                      |              |             |              |             |
| 0                                                                       | 2,027 (6.0%) | 138 (3.2%)  | 1,235 (3.9%) | 236 (2.2%)  |
| 0.25                                                                    | 13,329 (39%) | 1,077 (25%) | 9,414 (30%)  | 2,266 (21%) |
| 0.5                                                                     | 13,765 (41%) | 1,976 (46%) | 14,259 (46%) | 4,961 (47%) |
| 0.75                                                                    | 4,550 (13%)  | 1,025 (24%) | 5,648 (18%)  | 2,711 (26%) |
| 1                                                                       | 296 (0.9%)   | 86 (2.0%)   | 776 (2.5%)   | 406 (3.8%)  |
| <b>Functional assessment (difficulty with the following)</b>            |              |             |              |             |
| Walking 100 yards                                                       | 4,484 (13%)  | 2,385 (55%) | 10,298 (33%) | 6,501 (61%) |
| Sitting for 2 hours or more                                             | 7,102 (21%)  | 3,206 (75%) | 12,085 (39%) | 7,545 (71%) |
| Getting up from a chair after sitting for long period                   | 7,646 (23%)  | 3,371 (78%) | 13,281 (42%) | 8,115 (77%) |
| Climbing one flight of stairs without resting                           | 10,220 (30%) | 3,839 (89%) | 17,208 (55%) | 9,556 (90%) |
| Stooping, kneeling or crouching                                         | 11,283 (33%) | 3,850 (89%) | 17,627 (56%) | 9,409 (89%) |
| Reaching or extending arms above shoulder level (either arm)            | 2,783 (8.2%) | 1,581 (37%) | 6,334 (20%)  | 4,202 (40%) |
| Pulling or pushing large objects                                        | 8,744 (26%)  | 3,475 (81%) | 16,054 (51%) | 9,039 (85%) |
| Lifting or carrying weights over 5 kilos, like a heavy bag of groceries | 5,002 (15%)  | 2,538 (59%) | 11,813 (38%) | 7,367 (70%) |
| Picking up a coin from a table                                          | 859 (2.5%)   | 506 (12%)   | 3,170 (10%)  | 1,959 (19%) |
| <b>ADL/IADL* limitations (difficulty with the following)</b>            |              |             |              |             |
| Dressing, including putting on chappals, shoes, etc                     | 732 (2.2%)   | 416 (9.7%)  | 2,173 (6.9%) | 1,152 (11%) |
| Walking across a room                                                   | 588 (1.7%)   | 359 (8.3%)  | 2,227 (7.1%) | 1,217 (12%) |
| Bathing                                                                 | 575 (1.7%)   | 351 (8.2%)  | 2,244 (7.2%) | 1,239 (12%) |
| Eating                                                                  | 627 (1.8%)   | 370 (8.6%)  | 2,318 (7.4%) | 1,378 (13%) |
| Getting in or out of bed                                                | 1,259 (3.7%) | 829 (19%)   | 3,310 (11%)  | 2,122 (20%) |
| Using the toilet, including getting up and down                         | 1,895 (5.6%) | 1,151 (27%) | 4,855 (15%)  | 3,133 (30%) |
| Preparing a hot meal (cooking and serving)                              | 1,479 (4.4%) | 820 (19%)   | 5,175 (17%)  | 3,377 (32%) |
| Shopping for groceries                                                  | 2,181 (6.4%) | 1,234 (29%) | 6,684 (21%)  | 4,566 (43%) |
| Making telephone calls                                                  | 3,935 (12%)  | 1,397 (32%) | 8,108 (26%)  | 4,778 (45%) |
| Taking medications                                                      | 1,680 (4.9%) | 875 (20%)   | 4,318 (14%)  | 2,773 (26%) |
| Doing work around the house or garden                                   | 2,428 (7.2%) | 1,460 (34%) | 7,363 (23%)  | 5,032 (48%) |
| Managing money, such as paying bills and keeping track of expenses      | 3,072 (9.0%) | 1,494 (35%) | 7,410 (24%)  | 4,883 (46%) |

|                                                       |              |             |              |             |
|-------------------------------------------------------|--------------|-------------|--------------|-------------|
| Getting around or finding address in unfamiliar place | 3,767 (11%)  | 1,655 (38%) | 8,114 (26%)  | 5,221 (49%) |
| <b>Any form of mental impairment</b>                  | 465 (1.4%)   | 155 (3.6%)  | 757 (2.4%)   | 365 (3.4%)  |
| <b>Body mass index</b>                                |              |             |              |             |
| 0 (normal)                                            | 16,164 (52%) | 1,732 (40%) | 14,708 (52%) | 4,841 (46%) |
| 0.5 (underweight/overweight)                          | 7,667 (25%)  | 1,192 (28%) | 5,185 (18%)  | 2,071 (20%) |
| 1 (obese)                                             | 7,192 (23%)  | 1,378 (32%) | 8,157 (29%)  | 3,668 (35%) |
| <b>Weak grip strength</b>                             | 14,086 (46%) | 2,675 (62%) | 21,227 (76%) | 9,046 (86%) |
| <b>Slow gait speed</b>                                | 131 (0.4%)   | 70 (1.6%)   | 1,158 (4.2%) | 917 (8.7%)  |

\*ADL: Activities of Daily Living; IADL: Instrumental Activities of Daily Living

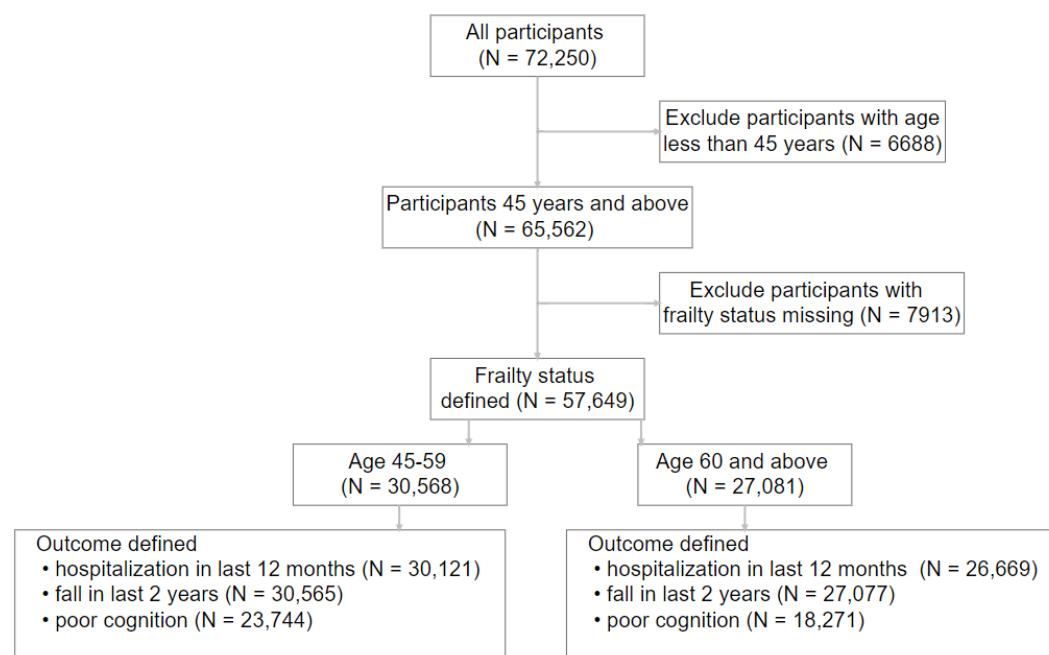

S1 Fig. Flowchart presenting selection of participants for analyses.



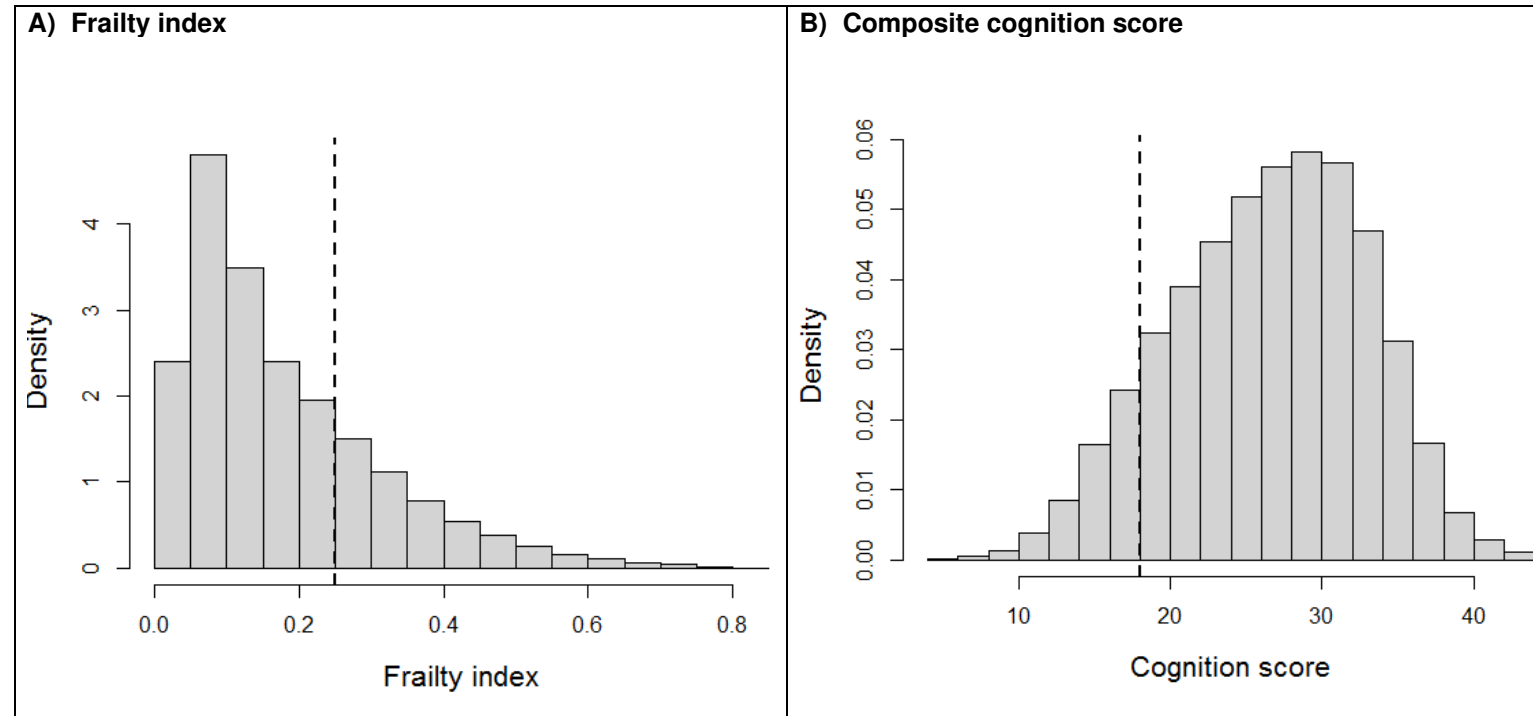

**S2 Fig. Distribution of frailty index and cognition score among 45-plus participants.** A) Frailty index had a mean value of 0.18 and standard deviation (SD) of 0.13, with values ranging from 0-0.83 and a median (IQR) of 0.14 (0.08, 0.25). The dotted line presents the cut-off 0.25. B) Composite cognition score value ranges from 4 to 43, with a mean of 27.01 (SD=6.36) and a median of 27 (IQR = 22,32). Poor cognition is defined as cognition score  $\leq 18$  (10<sup>th</sup> percentile marked as dotted line in the graph).

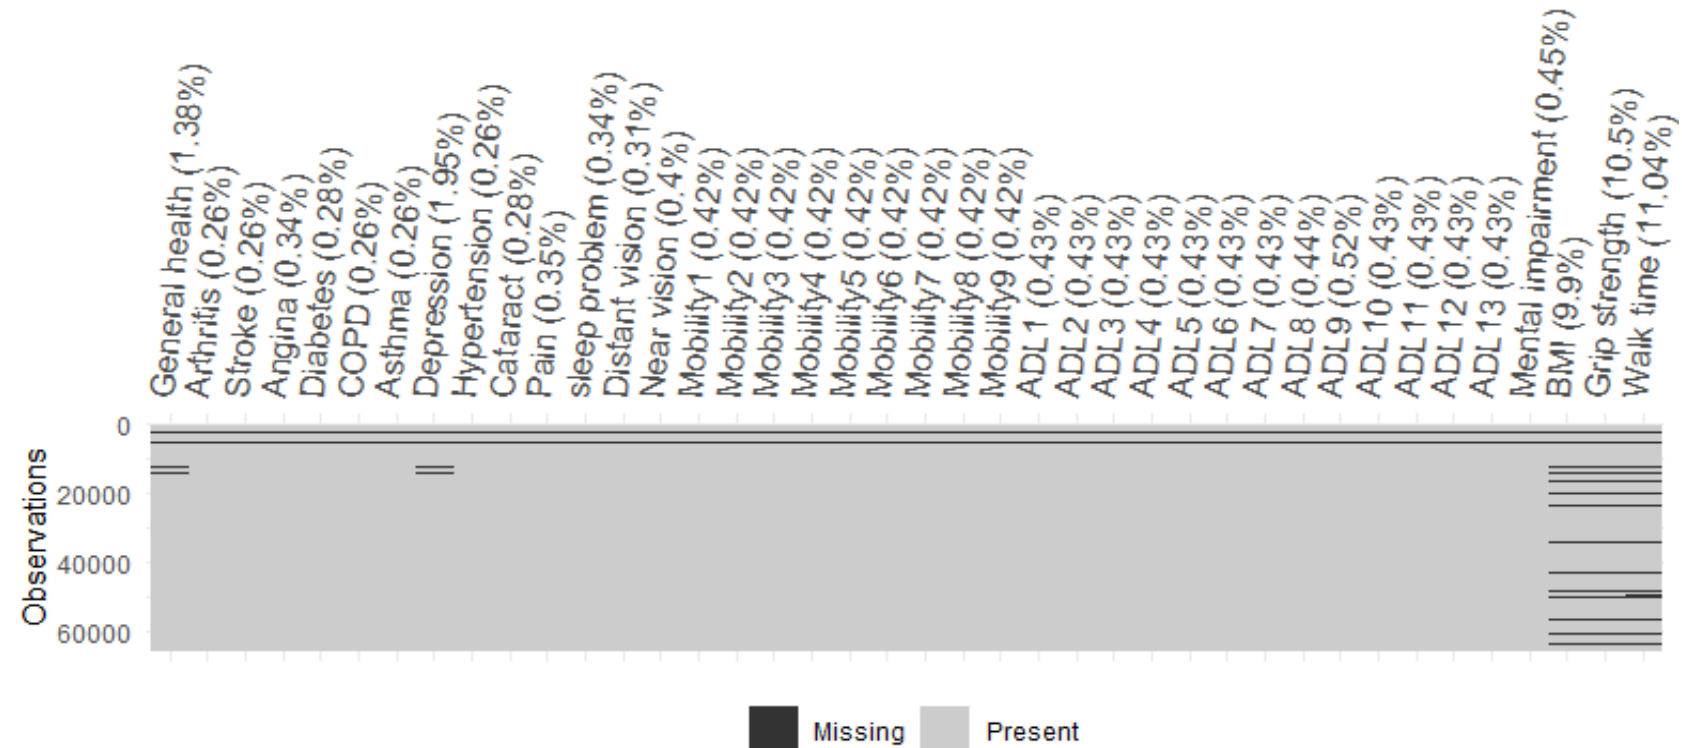

**S3 Fig. Missingness in deficit scores.** BMI:Body mass index; Mobility1:Walking 100 yards; Mobility2:Sitting for 2 hours or more; Mobility3:Getting up from a chair after sitting for long period; Mobility4:Climbing one flight of stairs without resting ; Mobility5:Stooping, kneeling or crouching; Mobility6:Reaching or extending arms above shoulder level (either arm); Mobility7:Pulling or pushing large objects; Mobility8:Lifting or carrying weights over 5 kilos, like a heavy bag of groceries; Mobility9:Picking up a coin from a table; Activities of Daily Living (ADL) 1:Dressing, including putting on chappals, shoes, etc.; ADL2:Walking across a room; ADL3:Bathing; ADL4:Eating; ADL5:Getting in or out of bed; ADL6:Using the toilet, including getting up and down; ADL7:Preparing a hot meal (cooking and serving); ADL8:Shopping for groceries; ADL9:Making telephone calls; ADL10:Taking medications; ADL11:Doing work around the house or garden; ADL12:Managing money, such as paying bills and keeping track of expenses; ADL13:Getting around or finding address in unfamiliar place.

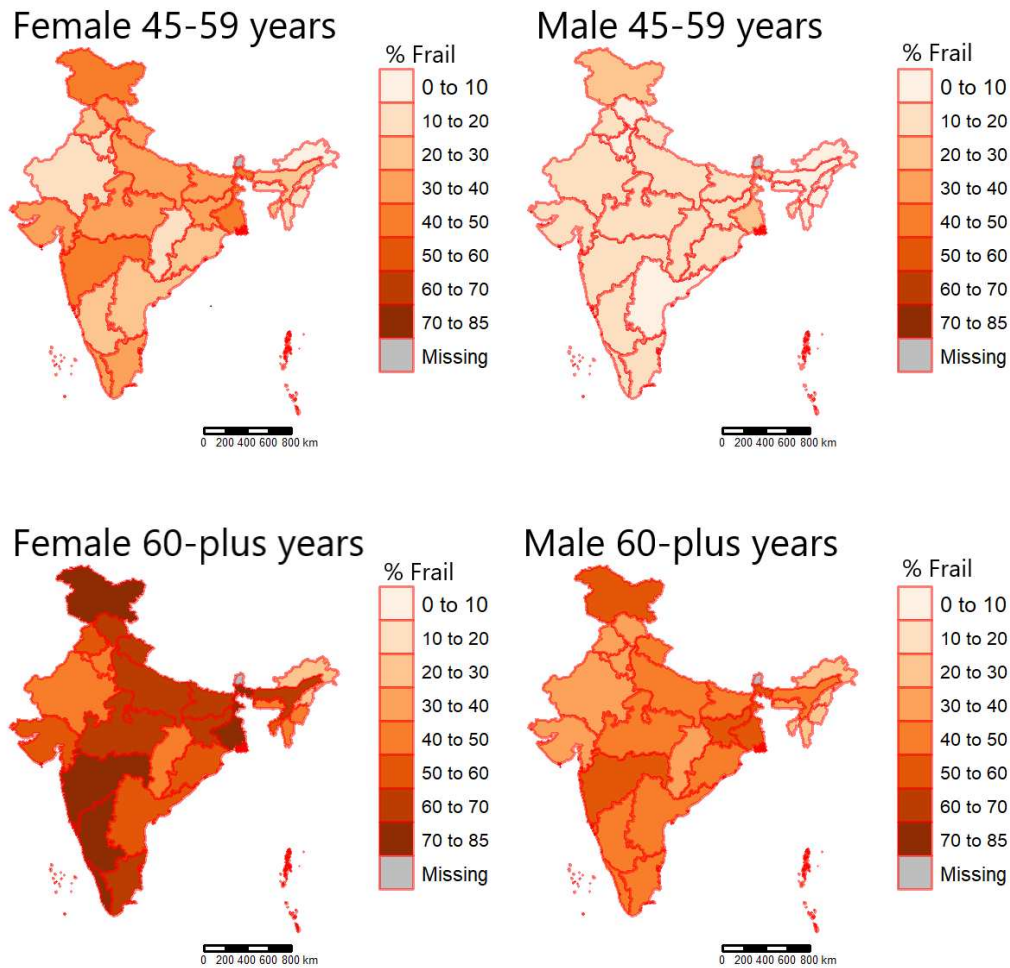

**S4 Fig. Prevalence of frailty across states, in middle-aged and elderly men and women.** Individuals with frailty index > 0.21 were considered as frail. Prevalence estimates are weighted, using state-level individual sampling weights provided in data.

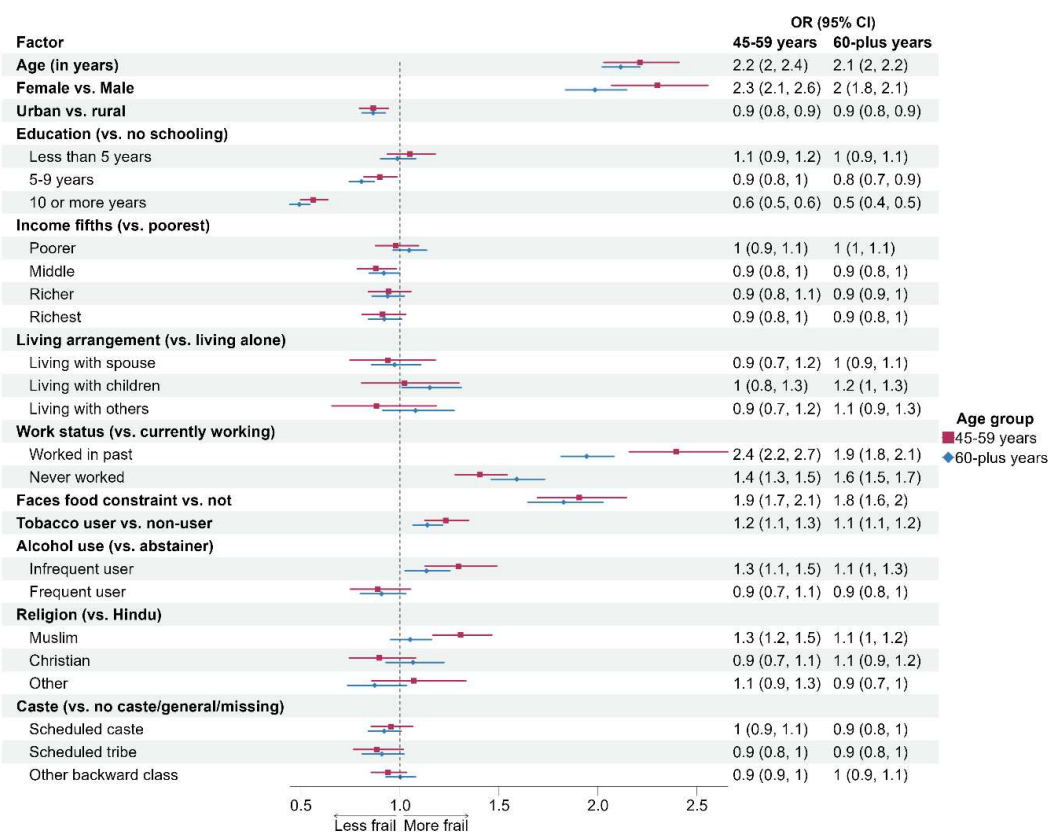

**S5 Fig. Forest plot of adjusted odds ratios (95% CI) for frailty, by participants' background characteristics, using income as the economic indicator.** Annual per capita household income is used as the economic indicator, instead of monthly per capita consumption expenditure. Per capita household income is computed by aggregating income from all sources (agricultural and non-agricultural business, wage/salary, pension and transfers) and dividing by the number of household members.
